# Supplementary material for: Intramolecular chaperone-assisted dual-anchoring activation (ICDA): a suitable preorganization for electrophilic halocyclization
Source: Royal Society of Chemistry journal article supplement (doi:10.1039/d4sc00581c), 2024-01-01
Supplement: d4sc00581c2.xlsx [file d4sc00581c2.xlsx]

## Sheet: Sheet1
	Energy of neutral specie (Hartree)	ZPE of neutral specie (Hartree)	ΔE' (vibrational) of neutral specie (KJ/mol)	Energy of halogenated specie (Hartree)	ZPE of halogenated specie (Hartree)	ΔE' (vibrational) of halogenated specie (KJ/mol)	Energy of neutral specie (kcal/mol)	Energy of halogenated specie (kcal/mol)	ZPE of neutral specie (kcal/mol)	ZPE of halogenated specie (kcal/mol)	ΔE' (vibrational) of neutral specie (kcal/mol)	ΔE' (vibrational) of halogenated specie (kcal/mol)	ΔE (electronic) (kcal/mol)	ΔZPE (kcal/mol)	ΔE' (vibrational) (kcal/mol)	Energy of Cl/Br ion (Hartree)	Halenium Affinity (kcal/mol)
HalA(Cl) of α-methylstyrene in CHCl3	-348.915	0.16193	126.42	-808.903	0.165703	133.856	-218948	-507594	101.613	103.98	30.2151	31.9924	-288646	2.36759	1.77736	-459.724	162.82
HalA(Cl) of TCCA in CHCl3	-1424.67	0.045752	66.9281	-1884.65	0.049276	74.3646	-893992	-1.18264e+06	28.7098	30.9212	15.9962	17.7736	-288646	2.21134	1.77737	-459.724	162.633
HalA(Cl) of 1a-extendedconformer in CHCl3	-576.781	0.206068	171.038	-1036.77	0.210325	178.475	-361935	-650585	129.31	131.981	40.8792	42.6565	-288650	2.67131	1.77736	-459.724	165.926
HalA(Br) of 1a-extendedconformer in CHCl3	-576.781	0.206068	171.038	-3147.83	0.21098	178.475	-361935	-1.97529e+06	129.31	132.392	40.8792	42.6565	-1.61336e+06	3.08233	1.77737	-2570.82	139.9
HalA(Br) of 1a-extendedconformer in DCE	-576.781	0.206026	171.038	-3147.84	0.210677	178.475	-361936	-1.9753e+06	129.283	132.202	40.8792	42.6566	-1.61336e+06	2.91855	1.77738	-2570.83	139.368
HalA(Cl) of 1a-coiledconformer in CHCl3	-576.765	0.204325	171.039	-1036.77	0.210325	178.475	-361925	-650585	128.216	131.981	40.8792	42.6565	-288660	3.76506	1.77734	-459.724	174.7
HalA(Br) of 1a-coiledconformer in CHCl3	-576.765	0.204325	171.039	-3147.83	0.21098	178.475	-361925	-1.97529e+06	128.216	132.392	40.8792	42.6565	-1.61337e+06	4.17608	1.77735	-2570.82	148.674
HalA(Br) of 1a-coiledconformer in DCE	-576.765	0.20425	171.038	-3147.84	0.210677	178.475	-361926	-1.9753e+06	128.169	132.202	40.8792	42.6566	-1.61337e+06	4.033	1.77738	-2570.83	148.128
HalA(Br) of active_1a in CHCl3	-576.754	0.204241	171.039	-3147.83	0.21098	178.475	-361919	-1.97529e+06	128.163	132.392	40.8792	42.6565	-1.61338e+06	4.22879	1.77735	-2570.82	155.442
HalA(Br) of active_1a in DCE	-576.755	0.204096	171.039	-3147.84	0.210677	178.475	-361919	-1.9753e+06	128.072	132.202	40.8792	42.6566	-1.61338e+06	4.12964	1.77737	-2570.83	154.683
HalA(Br) of anion of NBS in CHCl3	-360.13	0.07914	66.9281	-2931.24	0.081405	74.3646	-225985	-1.83938e+06	49.6611	51.0824	15.9962	17.7736	-1.61339e+06	1.42131	1.77736	-2570.82	176.143
HalA(Cl) of anion of NCS in CHCl3	-360.13	0.07914	66.9281	-820.17	0.081981	74.3645	-225985	-514665	49.6611	51.4439	15.9962	17.7736	-288680	1.78275	1.77735	-459.724	196.779
HalA(Br) of anion of NBP in CHCl3	-512.546	0.103247	96.6739	-3083.65	0.105323	104.11	-321627	-1.93502e+06	64.7885	66.0912	23.1056	24.883	-1.61339e+06	1.30271	1.77736	-2570.82	173.299
HalA(Cl) of anion of NCP in CHCl3	-512.546	0.103247	96.6739	-972.581	0.105859	104.11	-321627	-610304	64.7885	66.4275	23.1056	24.883	-288676	1.63905	1.77736	-459.724	193.628
HalA(Br) of anion of DBDMH in CHCl3	-3025.41	0.112824	104.11	-5596.5	0.114963	111.547	-1.89847e+06	-3.51186e+06	70.7981	72.1404	24.883	26.6603	-1.61338e+06	1.34224	1.77736	-2570.82	165.336
HalA(Cl) of anion of DCDMH in CHCl3	-914.345	0.113333	104.11	-1374.36	0.116205	111.547	-573760	-862427	71.1175	72.9197	24.883	26.6603	-288666	1.80221	1.77736	-459.724	183.29
HalA(Cl) of anion of BCTC_Cl_TBA in CHCl3	-1294.26	0.615522	498.243	-1754.28	0.616826	505.679	-812160	-1.10083e+06	386.246	387.064	119.083	120.86	-288665	0.818272	1.77731	-459.724	183.245
HalA(Br) of anion of BCTC_Br_TBA in CHCl3	-1294.26	0.615522	498.243	-3865.35	0.616232	505.679	-812160	-2.42555e+06	386.246	386.691	119.083	120.86	-1.61339e+06	0.445532	1.77736	-2570.82	170.229
HalA(Br) of anion of BCTC_Br_TMA in CHCl3	-822.571	0.271019	230.53	-3393.66	0.271338	237.967	-516171	-2.12955e+06	170.067	170.267	55.098	56.8754	-1.61338e+06	0.200176	1.77737	-2570.82	167.624
HalA(Br) of anion of BCTC_Br_TMA in DCE	-822.582	0.269893	230.53	-3393.67	0.271241	237.967	-516178	-2.12956e+06	169.36	170.206	55.098	56.8754	-1.61338e+06	0.845883	1.77741	-2570.83	156.387
HalA(Br) of anion of active_BCTC_Br_TMA in CHCl3	-822.571	0.271019	230.53	-3393.63	0.2694	237.967	-516171	-2.12953e+06	170.067	169.051	55.098	56.8754	-1.61336e+06	-1.01594	1.77736	-2570.82	148.008
HalA(Br) of anion of active_BCTC_Br_TMA in DCE	-822.582	0.269893	230.53	-3393.63	0.269501	237.966	-516178	-2.12954e+06	169.36	169.114	55.098	56.8754	-1.61336e+06	-0.245984	1.77734	-2570.83	137.664
HalA(Cl) of anion of BPO-Cl in CHCl3	-420.281	0.102625	89.2375	-880.287	0.105036	96.6739	-263730	-552388	64.3982	65.9111	21.3283	23.1056	-288658	1.51293	1.77735	-459.724	175.338
HalA(Br) of anion of BPO-Br in CHCl3	-420.281	0.102625	89.2375	-2991.36	0.104634	96.6739	-263730	-1.87711e+06	64.3982	65.6588	21.3283	23.1056	-1.61338e+06	1.26067	1.77735	-2570.82	160.398
HalA(Br) of anion of BPO-Br in DCE	-420.29	0.102606	89.2375	-2991.36	0.104608	96.674	-263736	-1.87711e+06	64.3862	65.6425	21.3283	23.1056	-1.61337e+06	1.25627	1.77737	-2570.83	149.05
