# Supplementary material for: Intramolecular chaperone-assisted dual-anchoring activation (ICDA): a suitable preorganization for electrophilic halocyclization
Source: Royal Society of Chemistry journal article supplement (doi:10.1039/d4sc00581c), 2024-01-01
Supplement: d4sc00581c3.pdf [file d4sc00581c3.pdf]

## NMR Spectra of Products

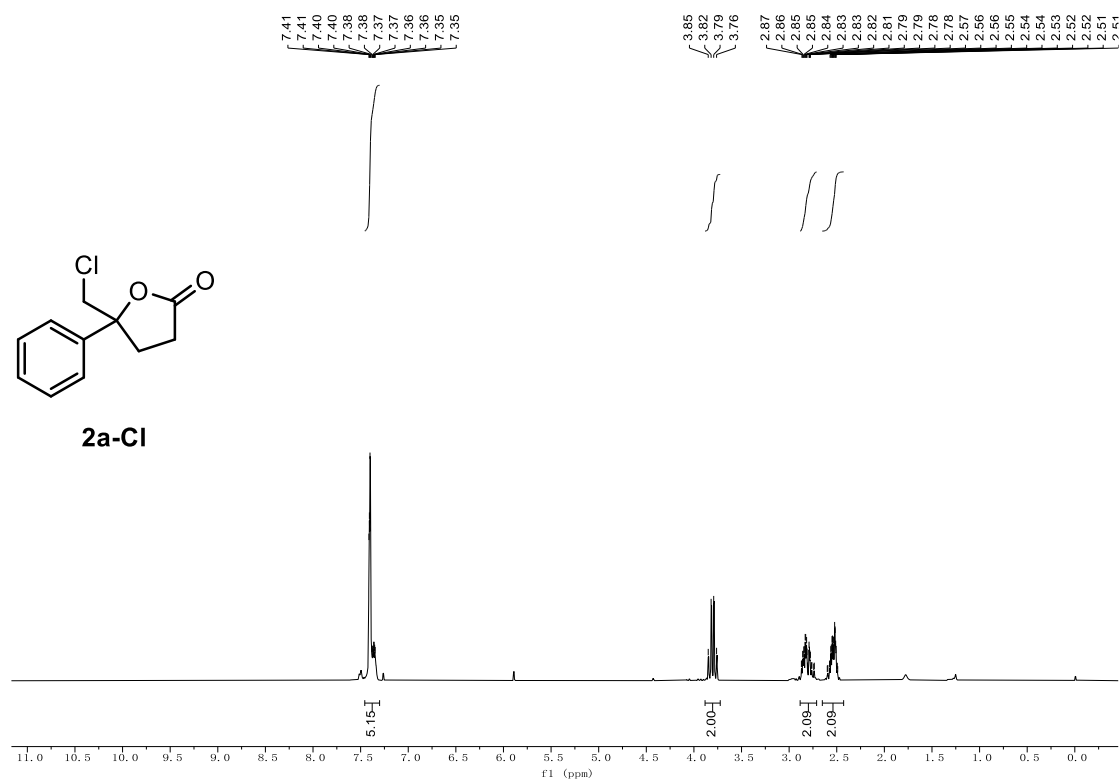

Figure S31. <sup>1</sup>H NMR of 5-(chloromethyl)-5-phenyldihydrofuran-2(3H)-one (2a-Cl)

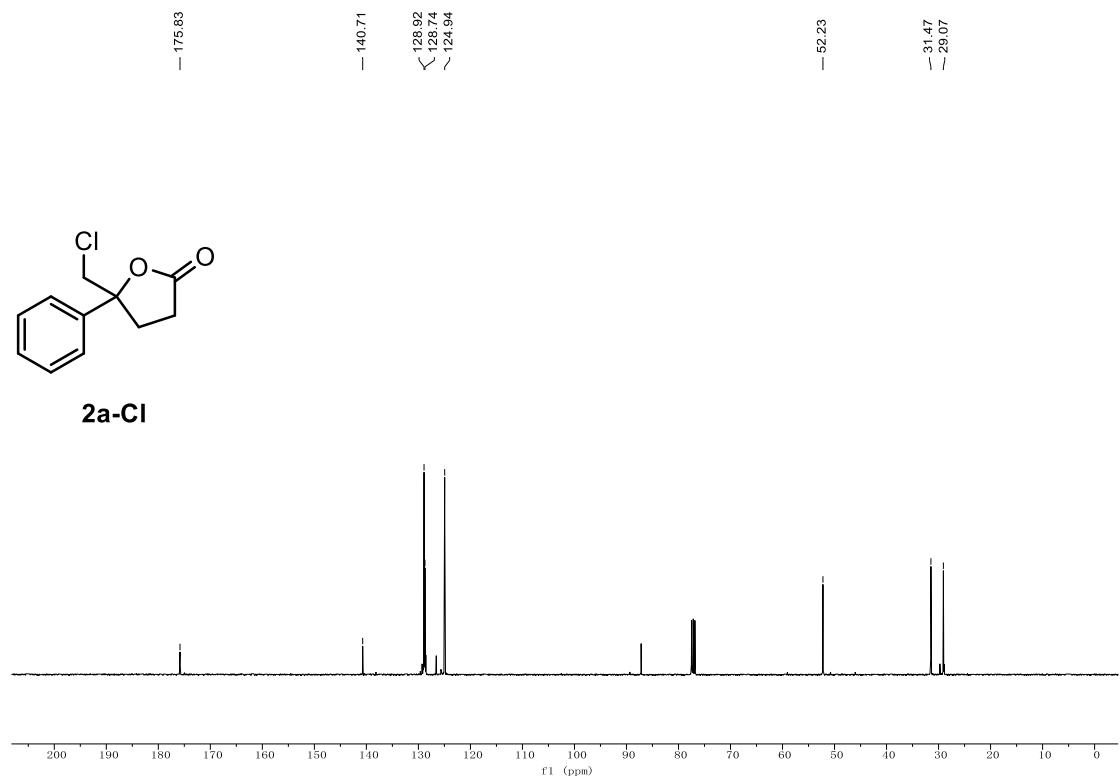

Figure S32. <sup>13</sup>C NMR of 5-(chloromethyl)-5-phenyldihydrofuran-2(3H)-one (2a-Cl)

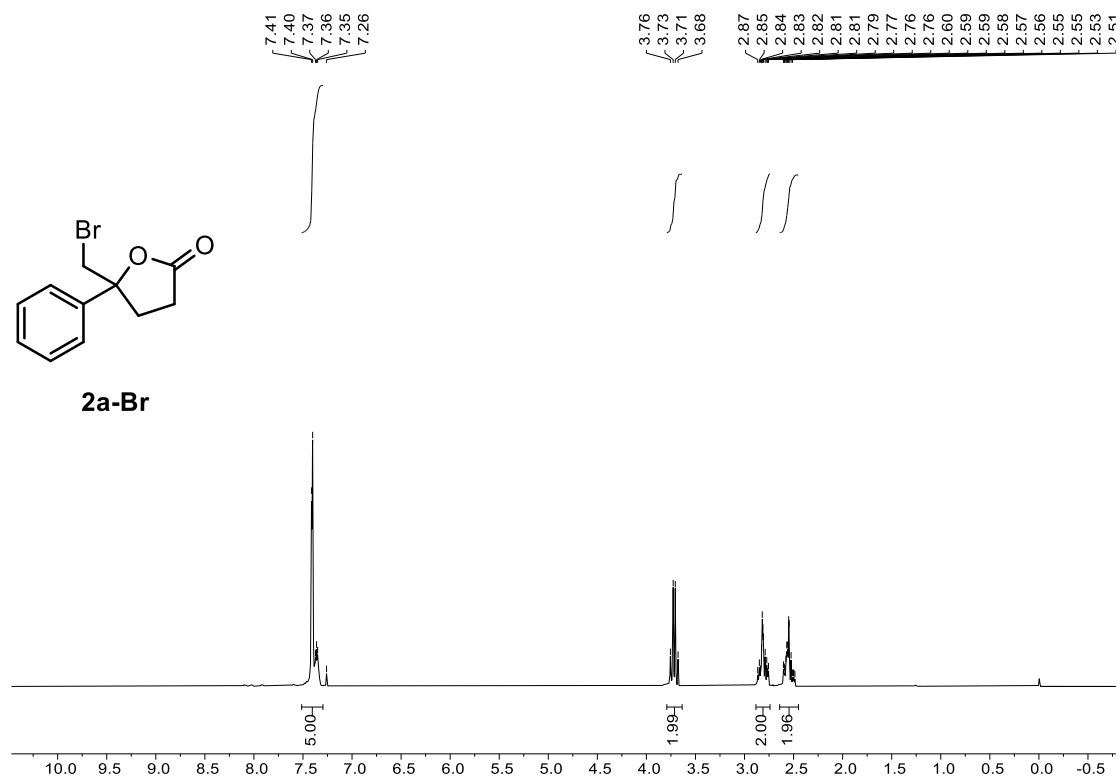

Figure S33. <sup>1</sup>H NMR of 5-(bromomethyl)-5-phenyldihydrofuran-2(3H)-one (**2a-Br**)

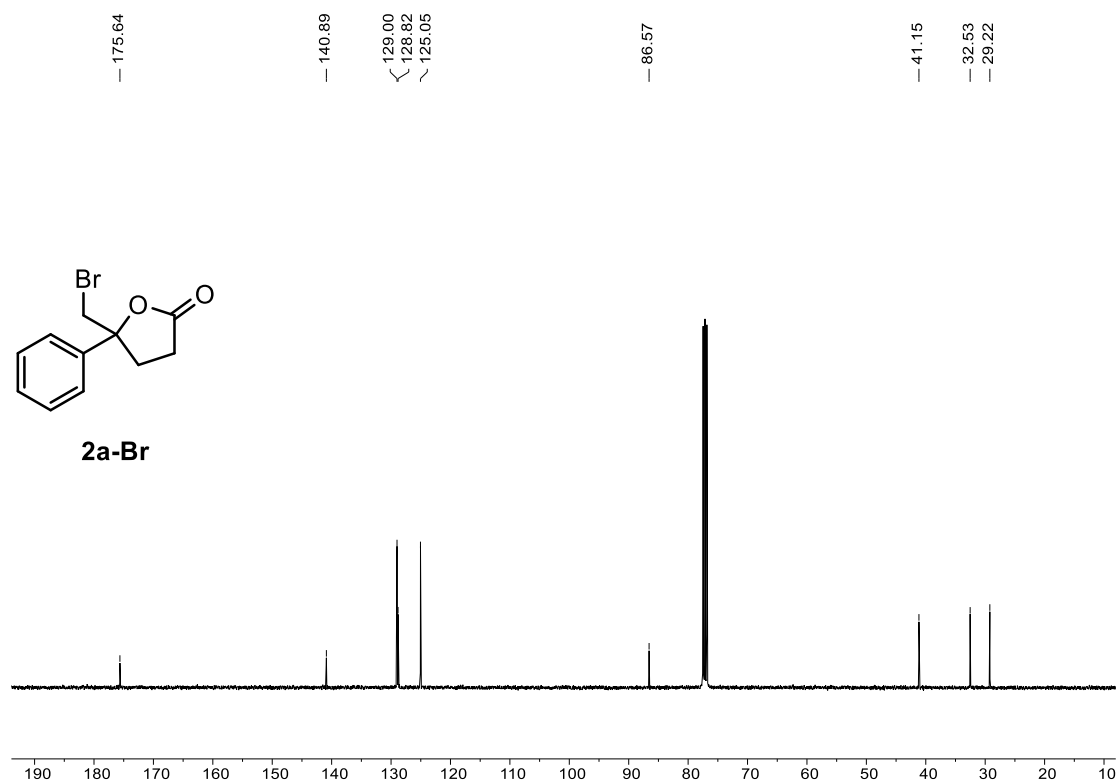

Figure S34. <sup>13</sup>C NMR of 5-(bromomethyl)-5-phenyldihydrofuran-2(3H)-one (**2a-Br**)

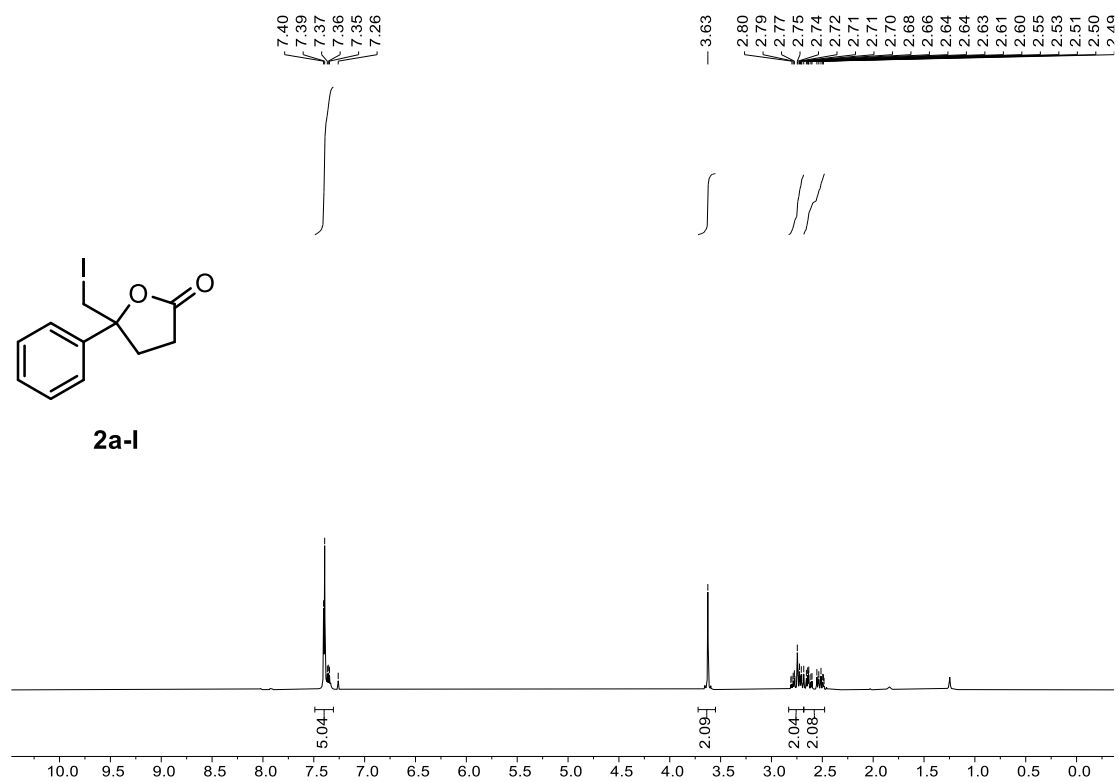

Figure S35. <sup>1</sup>H NMR of 5-(iodomethyl)-5-phenyldihydrofuran-2(3H)-one (**2a-I**)

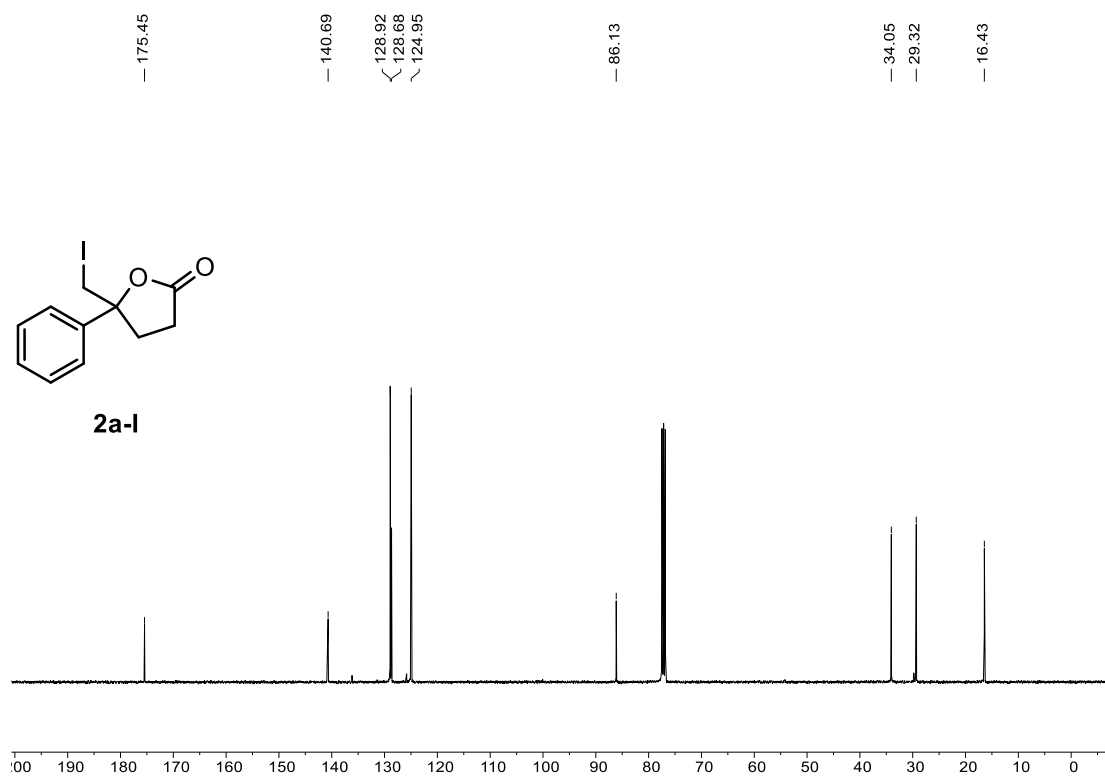

Figure S36. <sup>13</sup>C NMR of 5-(iodomethyl)-5-phenyldihydrofuran-2(3H)-one (**2a-I**)

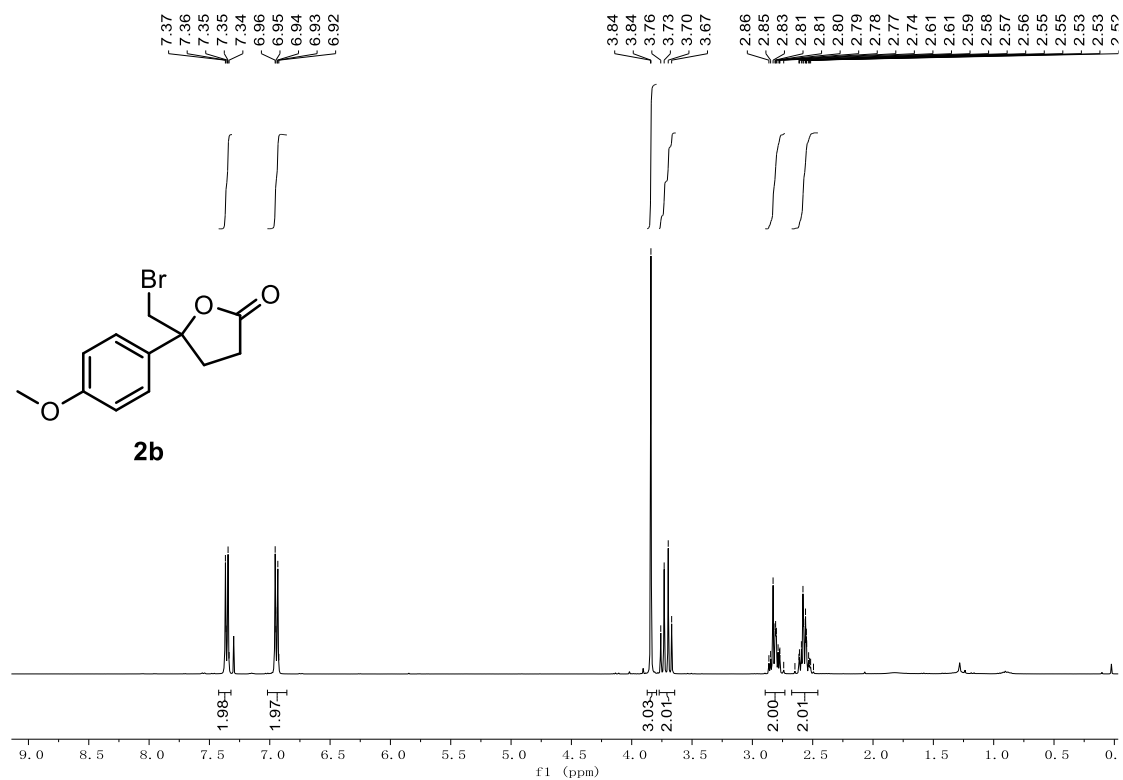

**Figure S37.** <sup>1</sup>H NMR of 5-(bromomethyl)-5-(4-methoxyphenyl)dihydrofuran-2(3*H*)-one (**2b**)

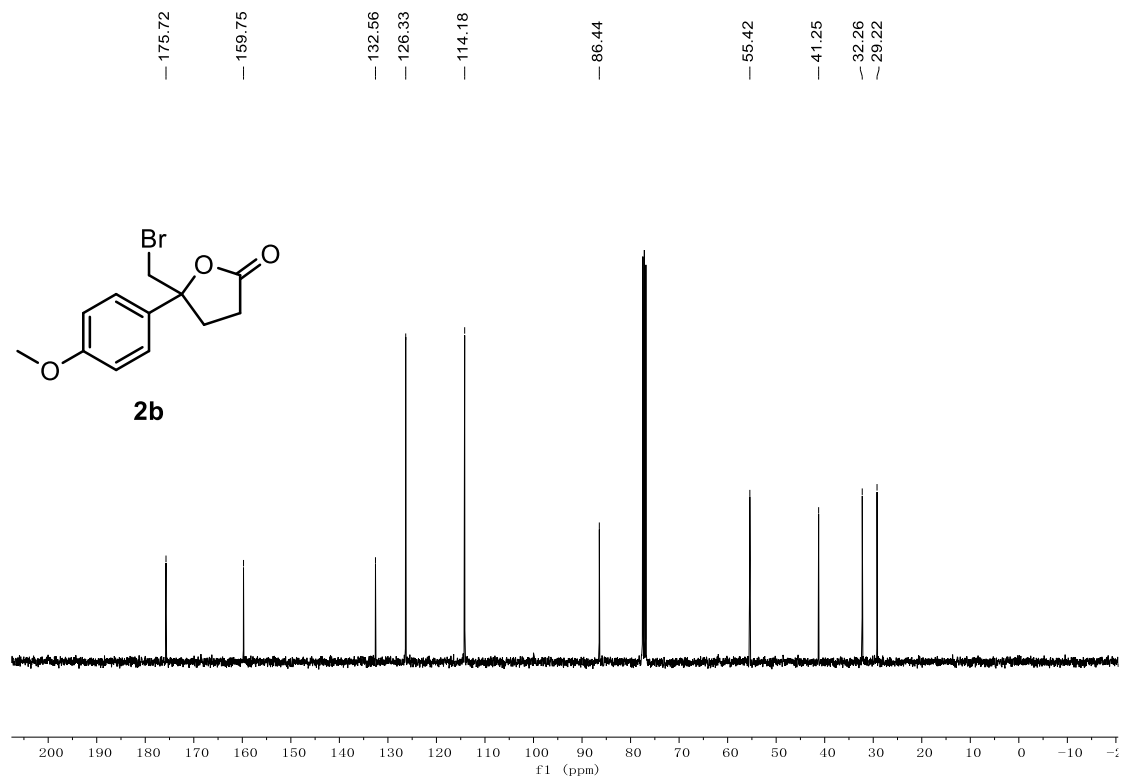

**Figure S38.** <sup>13</sup>C NMR of 5-(bromomethyl)-5-(4-methoxyphenyl)dihydrofuran-2(3*H*)-one (**2b**)

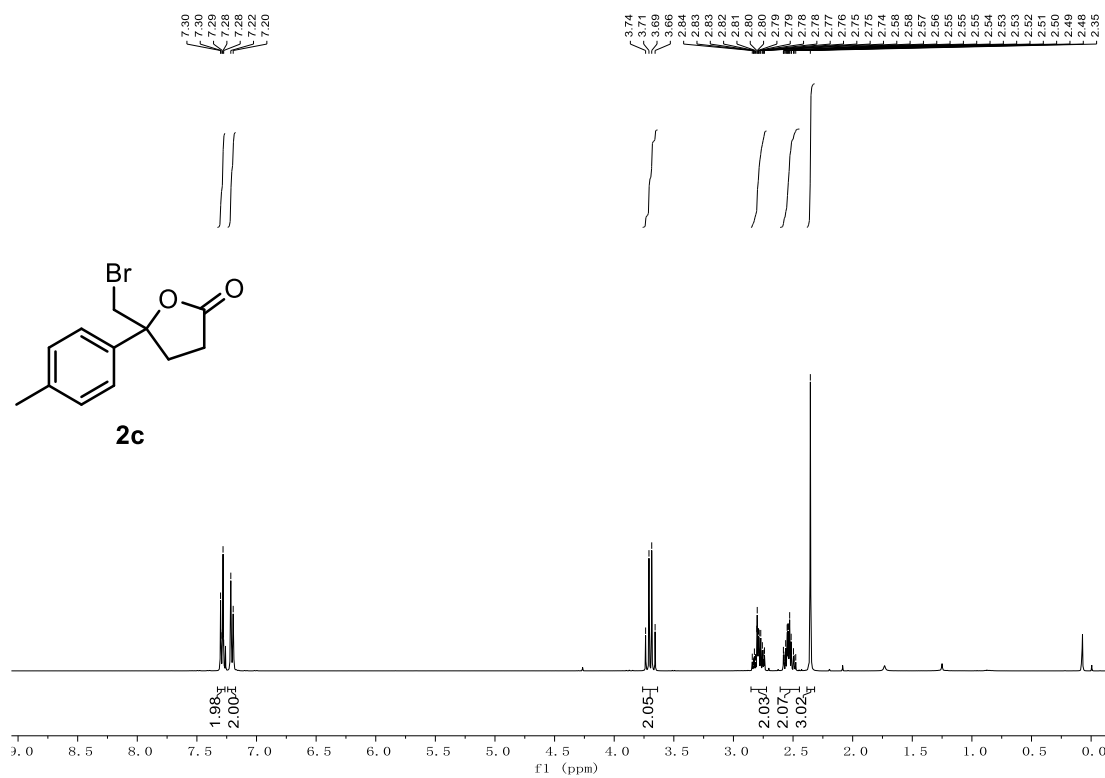

**Figure S39.** <sup>1</sup>H NMR of 5-(bromomethyl)-5-(p-tolyl)dihydrofuran-2(3H)-one (**2c**)

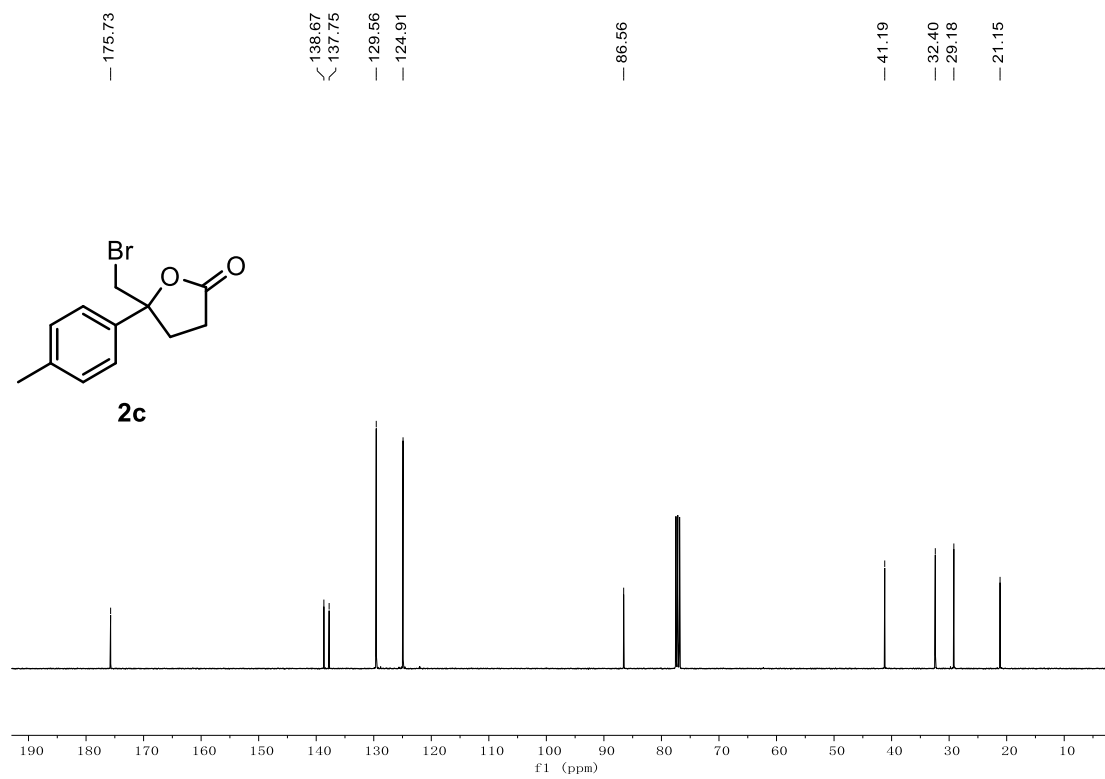

**Figure S40.** <sup>13</sup>C NMR of 5-(bromomethyl)-5-(p-tolyl)dihydrofuran-2(3H)-one (**2c**)

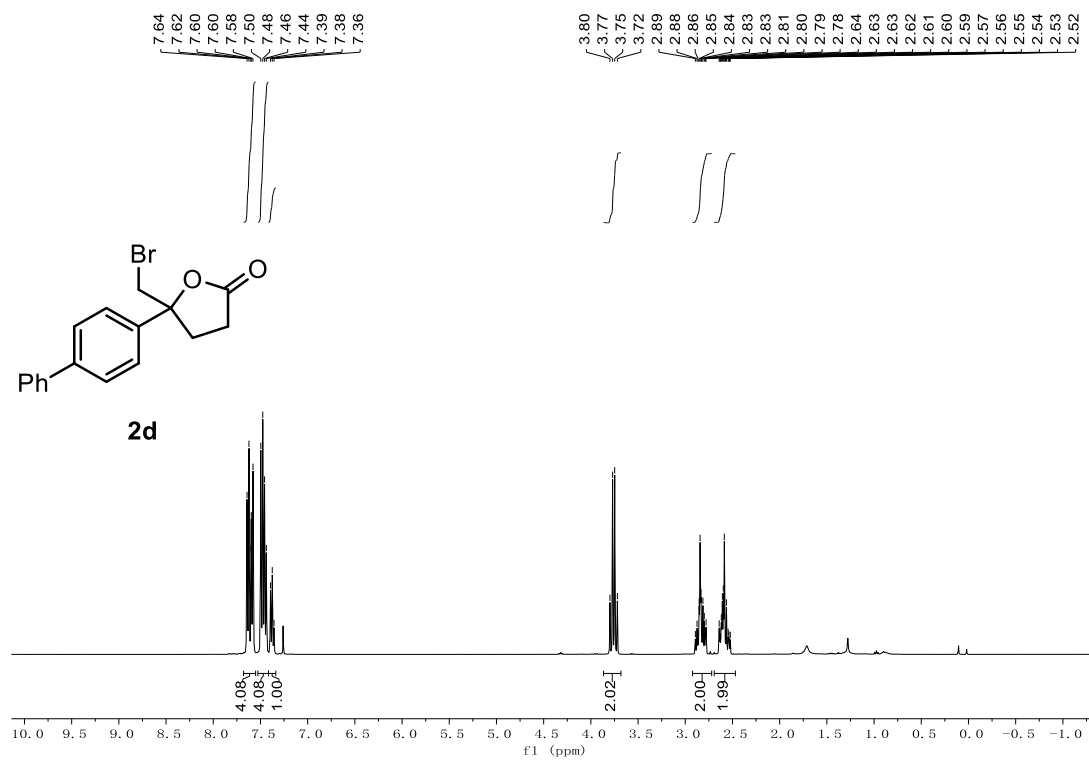

**Figure S41.** <sup>1</sup>H NMR of 5-([1,1'-biphenyl]-4-yl)-5-(bromomethyl)dihydrofuran-2(3*H*)-one (**2d**)

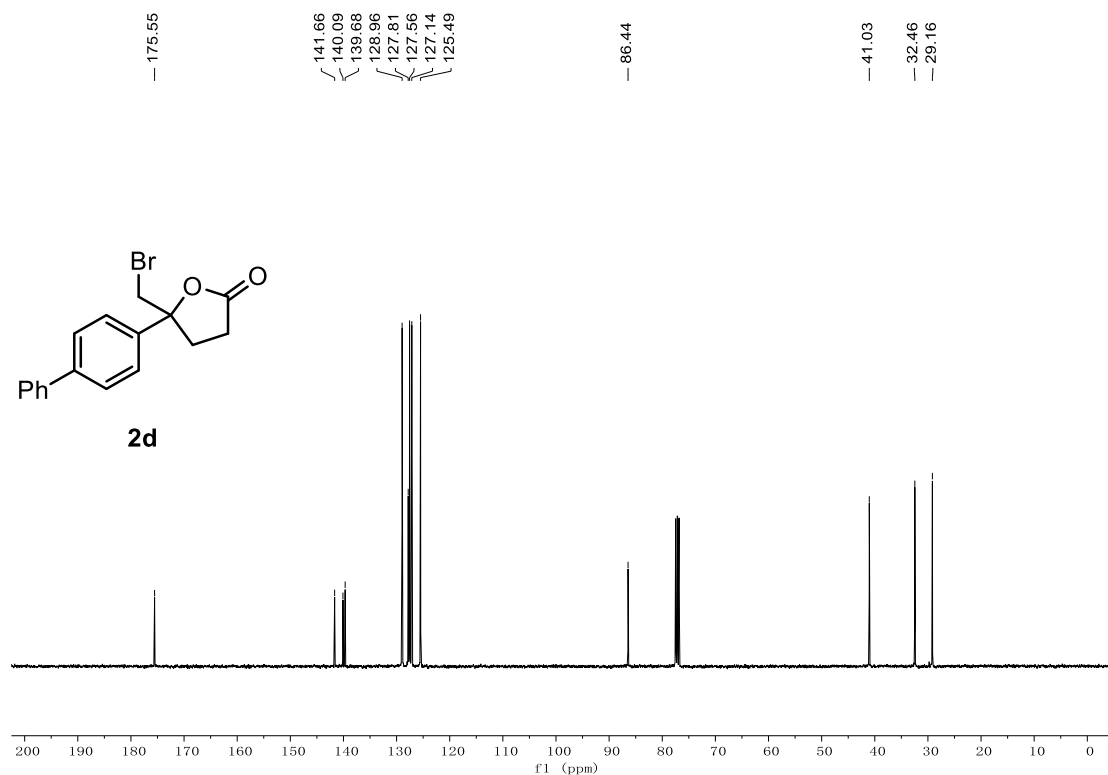

**Figure S42.** <sup>13</sup>C NMR of 5-([1,1'-biphenyl]-4-yl)-5-(bromomethyl)dihydrofuran-2(3*H*)-one (**2d**)

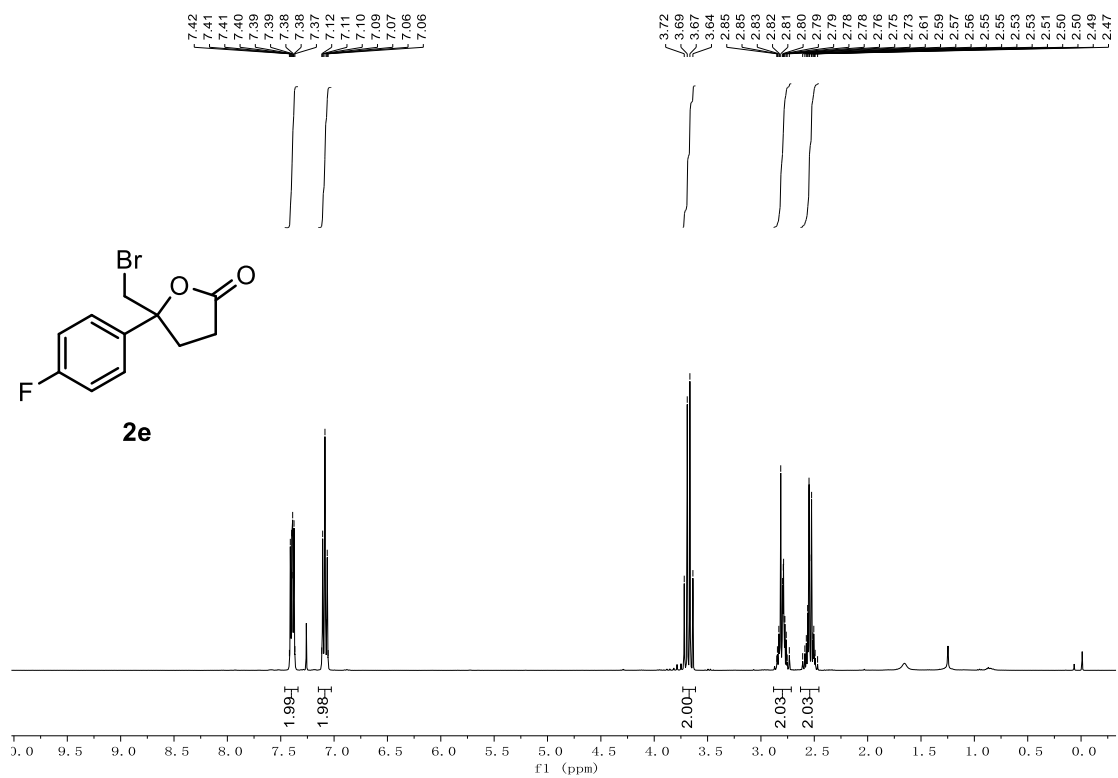

**Figure S43.** <sup>1</sup>H NMR of 5-(bromomethyl)-5-(4-fluorophenyl)dihydrofuran-2(3H)-one (**2e**)

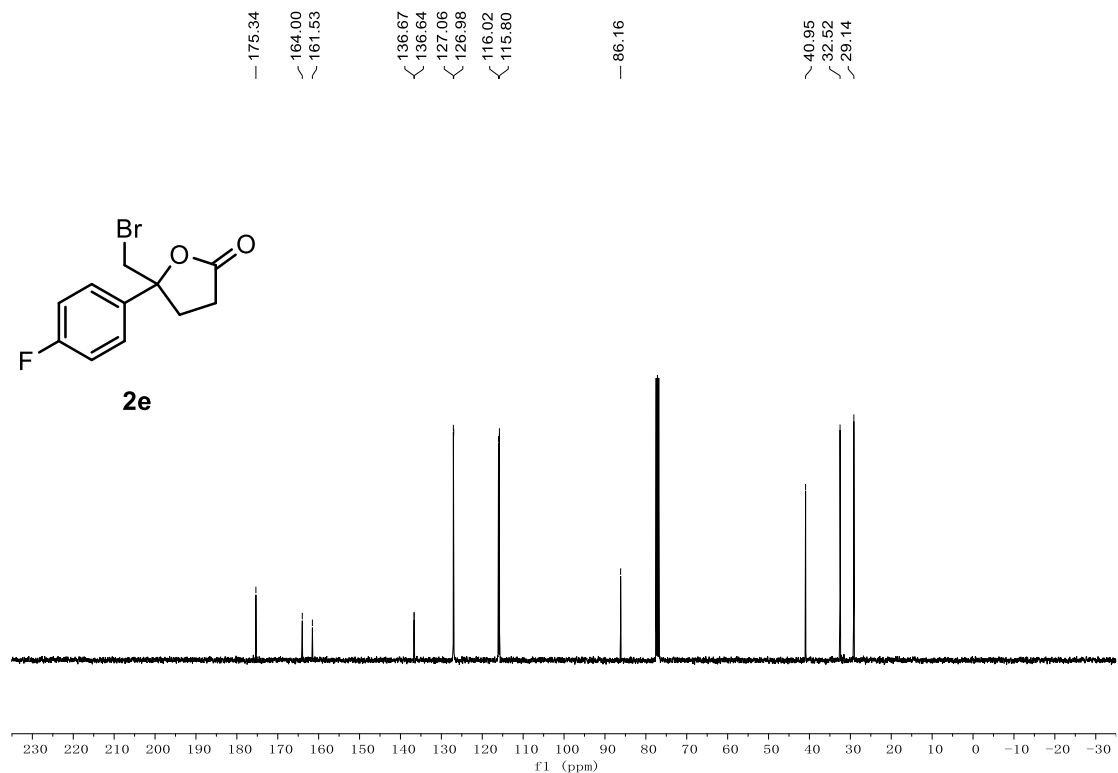

**Figure S44.** <sup>13</sup>C NMR of 5-(bromomethyl)-5-(4-fluorophenyl)dihydrofuran-2(3H)-one (**2e**)

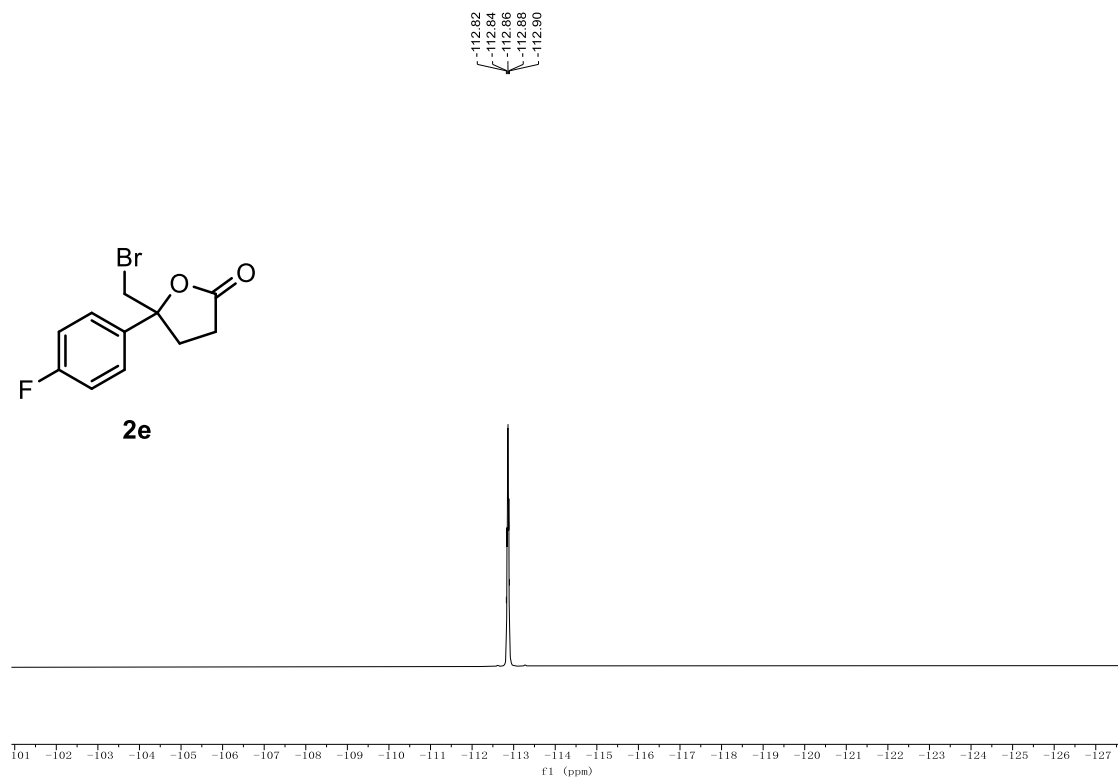

Figure S45.  $^{19}\text{F}$  NMR of 5-(bromomethyl)-5-(4-fluorophenyl)dihydrofuran-2(3H)-one (**2e**)

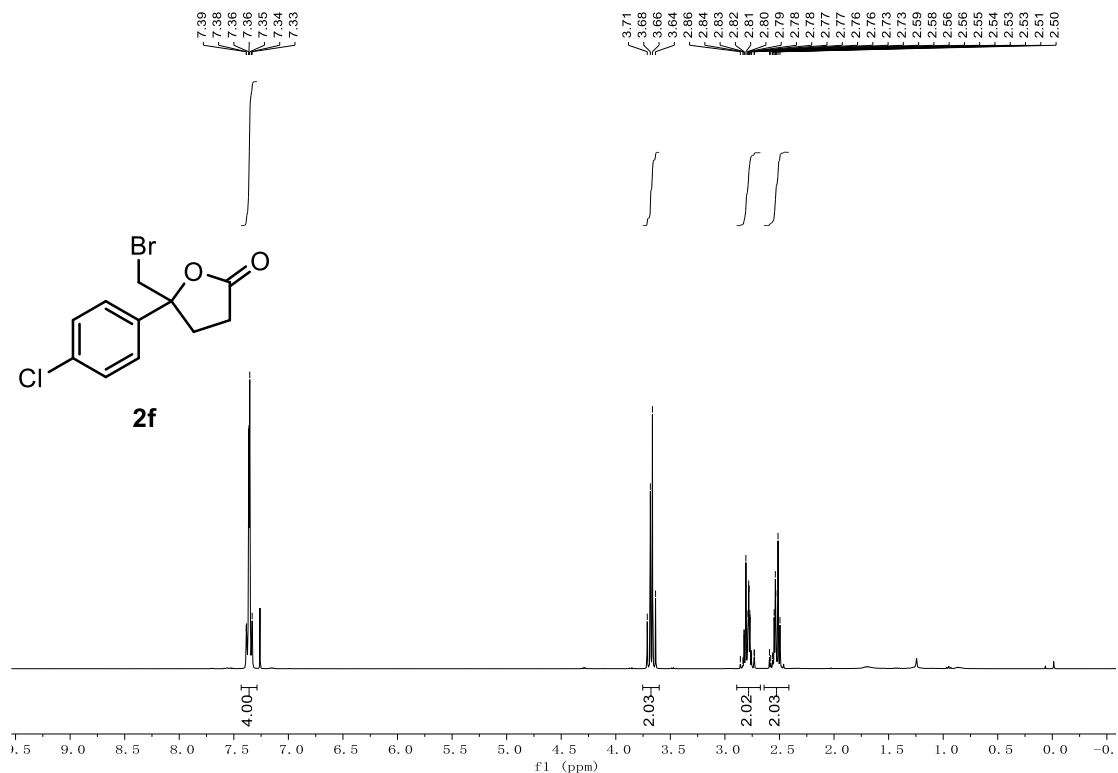

Figure S46.  $^1\text{H}$  NMR of 5-(bromomethyl)-5-(4-chlorophenyl)dihydrofuran-2(3H)-one (**2f**)



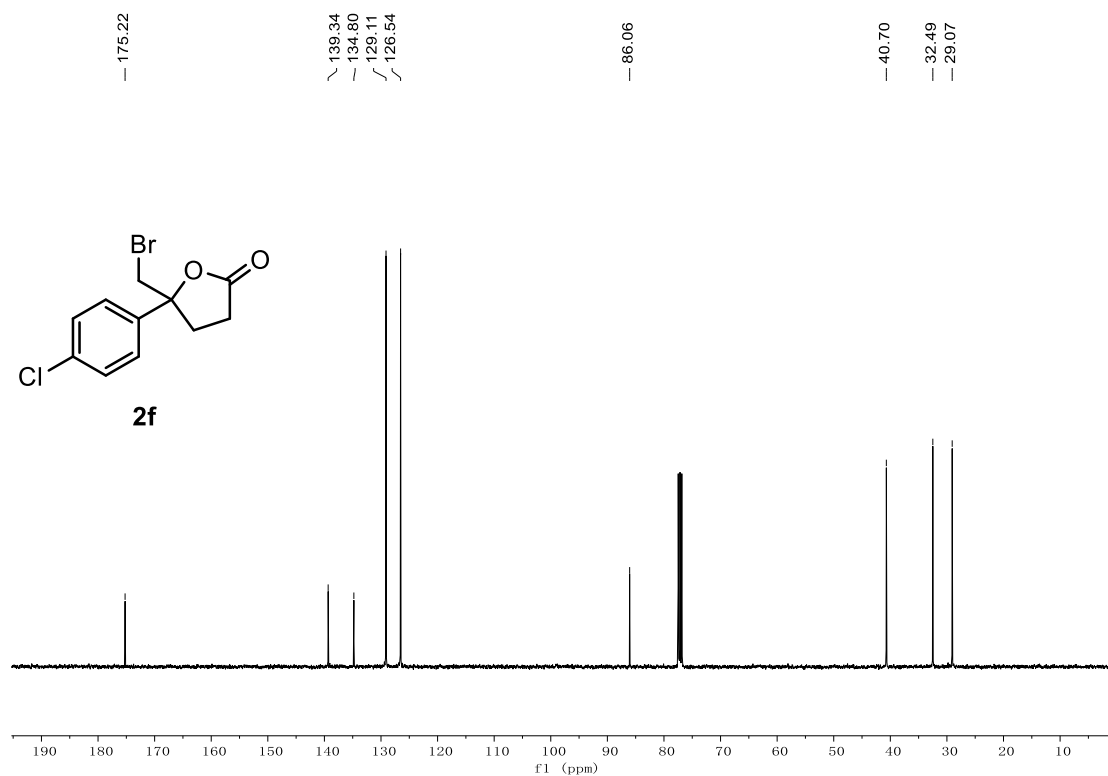

**Figure S47.**  $^{13}\text{C}$  NMR of 5-(bromomethyl)-5-(4-chlorophenyl)dihydrofuran-2(3H)-one (**2f**)

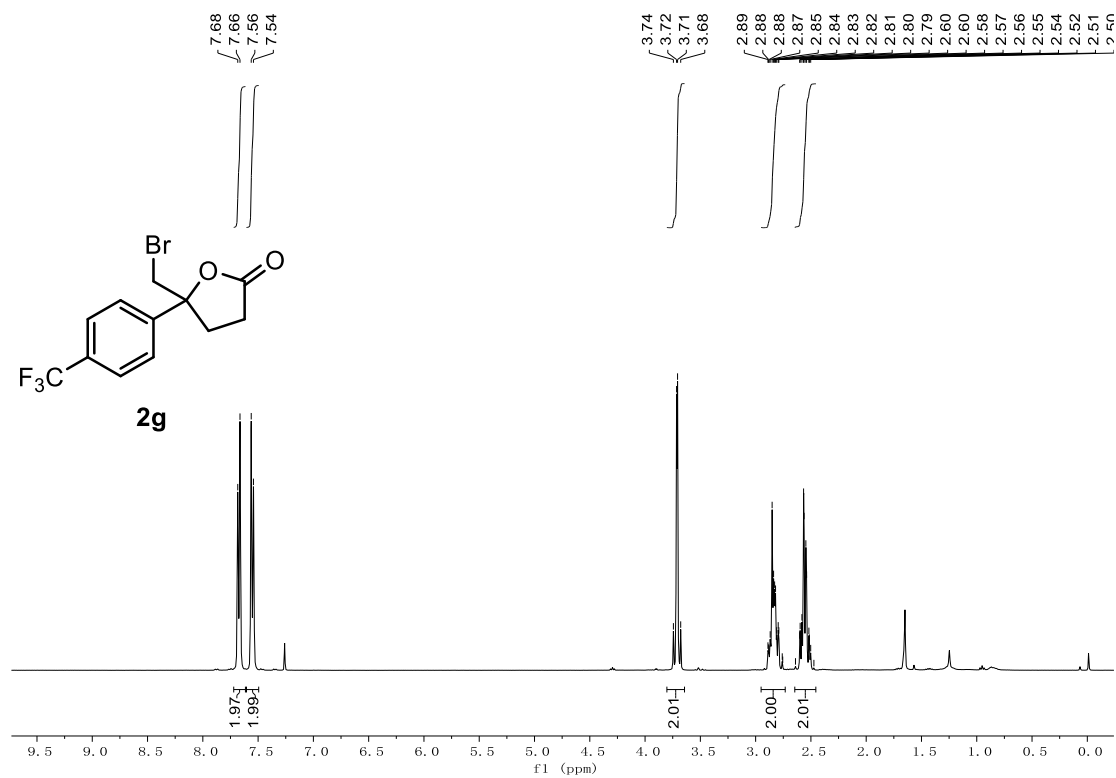

**Figure S48.**  $^1\text{H}$  NMR of 5-(bromomethyl)-5-(4-(trifluoromethyl)phenyl)dihydrofuran-2(3H)-one (**2g**)

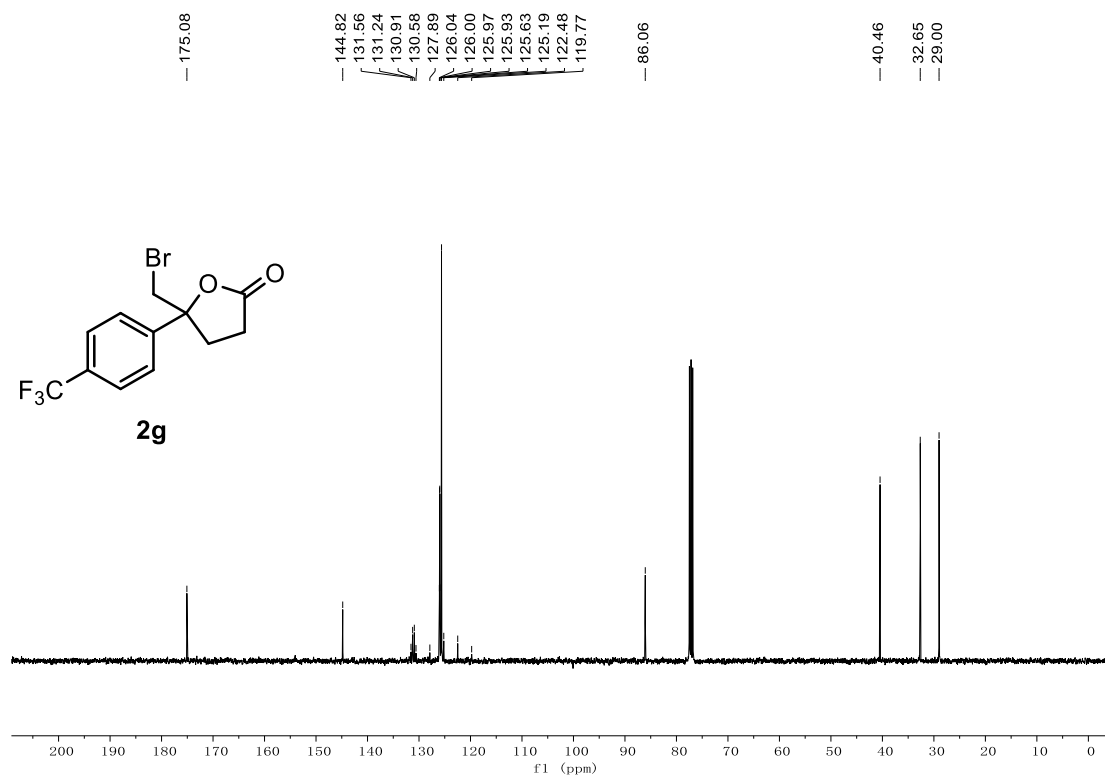

Figure S49. <sup>13</sup>C NMR of 5-(bromomethyl)-5-(4-(trifluoromethyl)phenyl)dihydrofuran-2(3H)-one (**2g**)

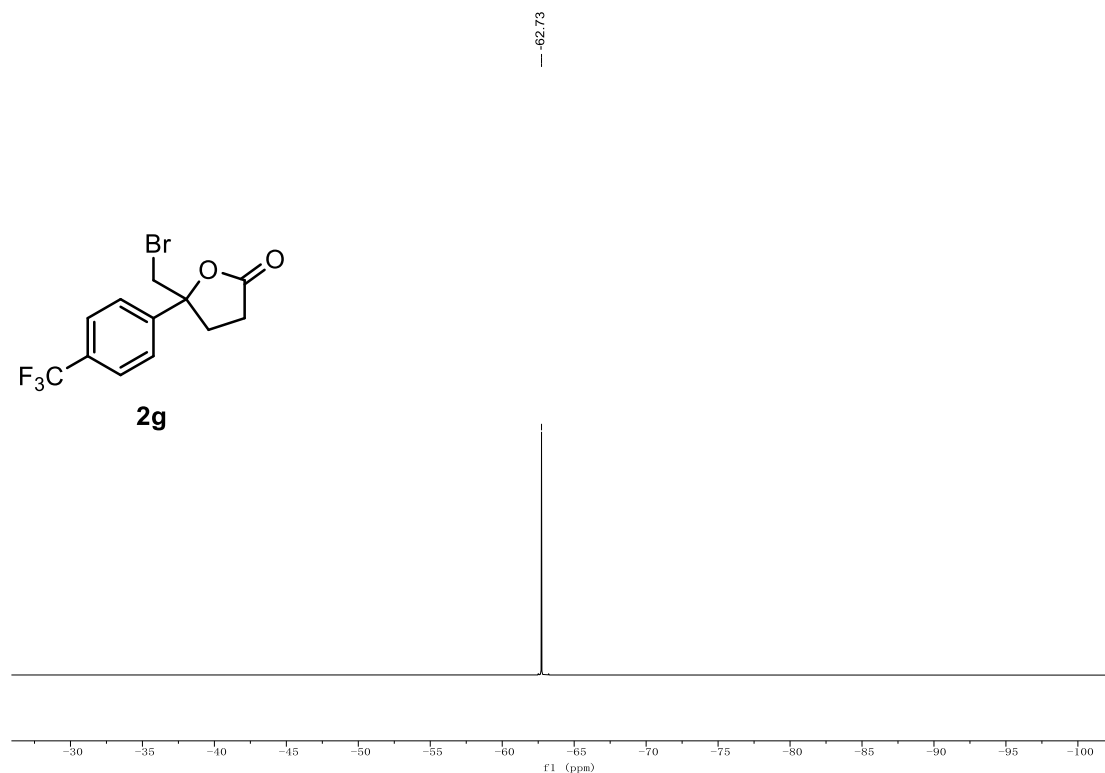

Figure S50. <sup>19</sup>F NMR of 5-(bromomethyl)-5-(4-(trifluoromethyl)phenyl)dihydrofuran-2(3H)-one (**2g**)

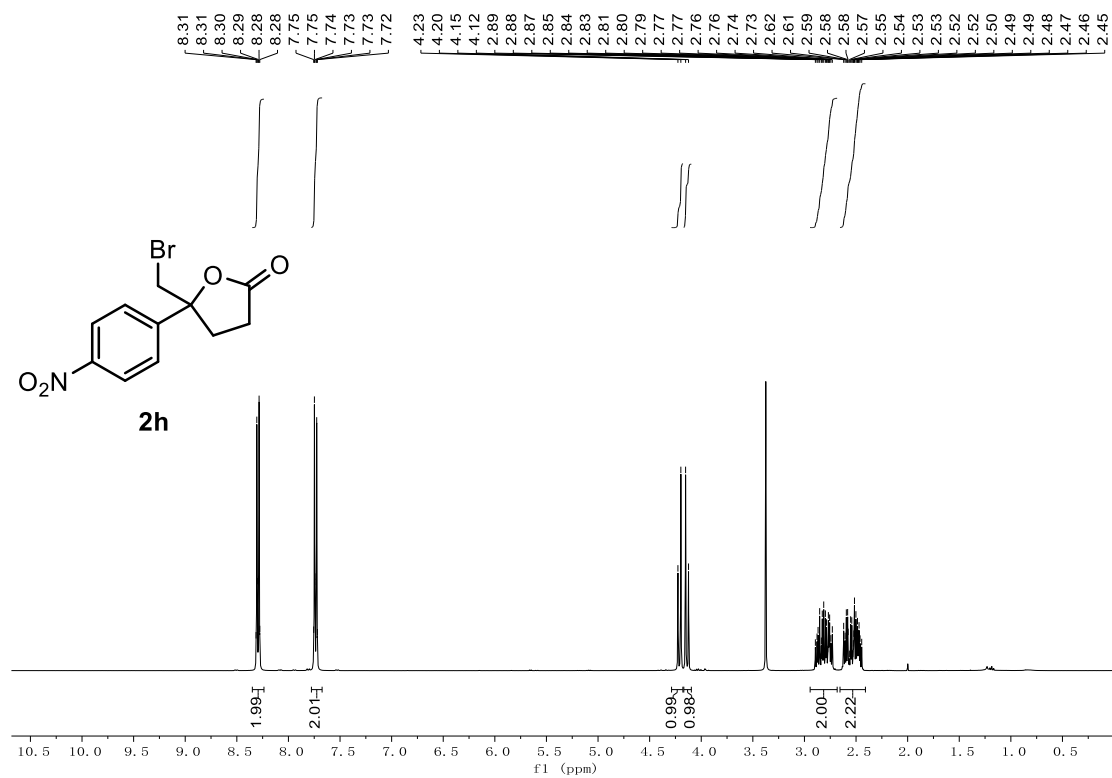

**Figure S51.** <sup>1</sup>H NMR of 5-(bromomethyl)-5-(4-nitrophenyl)dihydrofuran-2(3H)-one (**2h**)

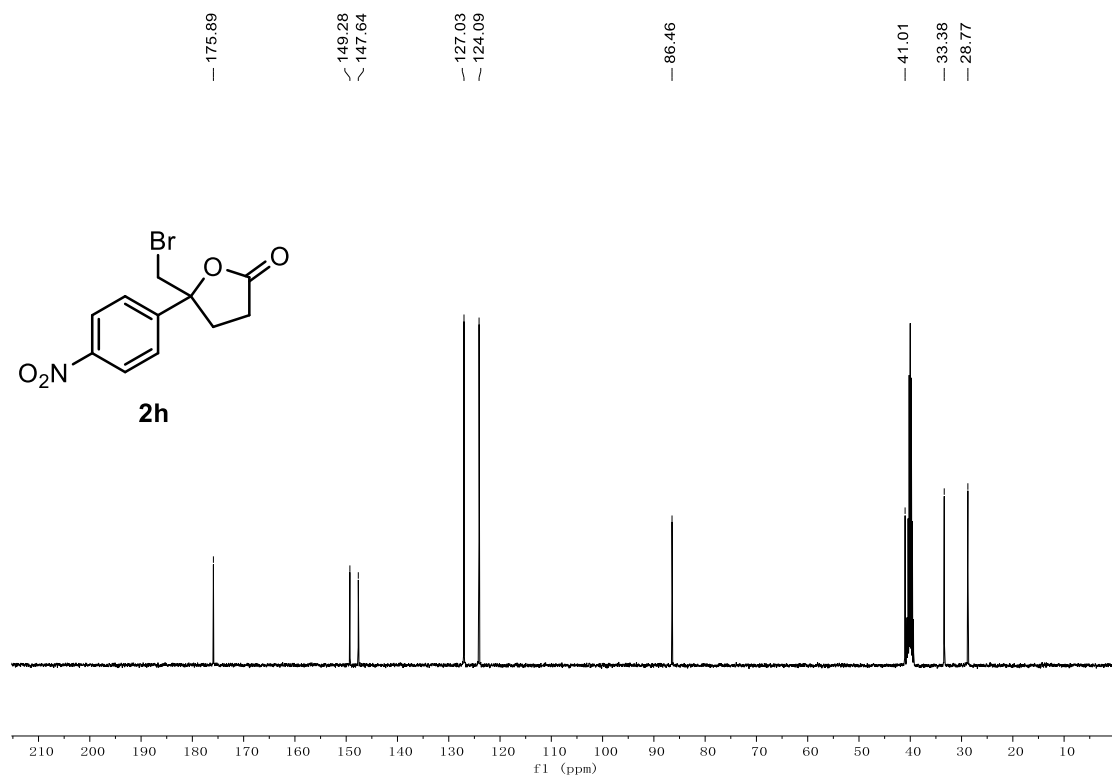

**Figure S52.** <sup>13</sup>C NMR of 5-(bromomethyl)-5-(4-nitrophenyl)dihydrofuran-2(3H)-one (**2h**)

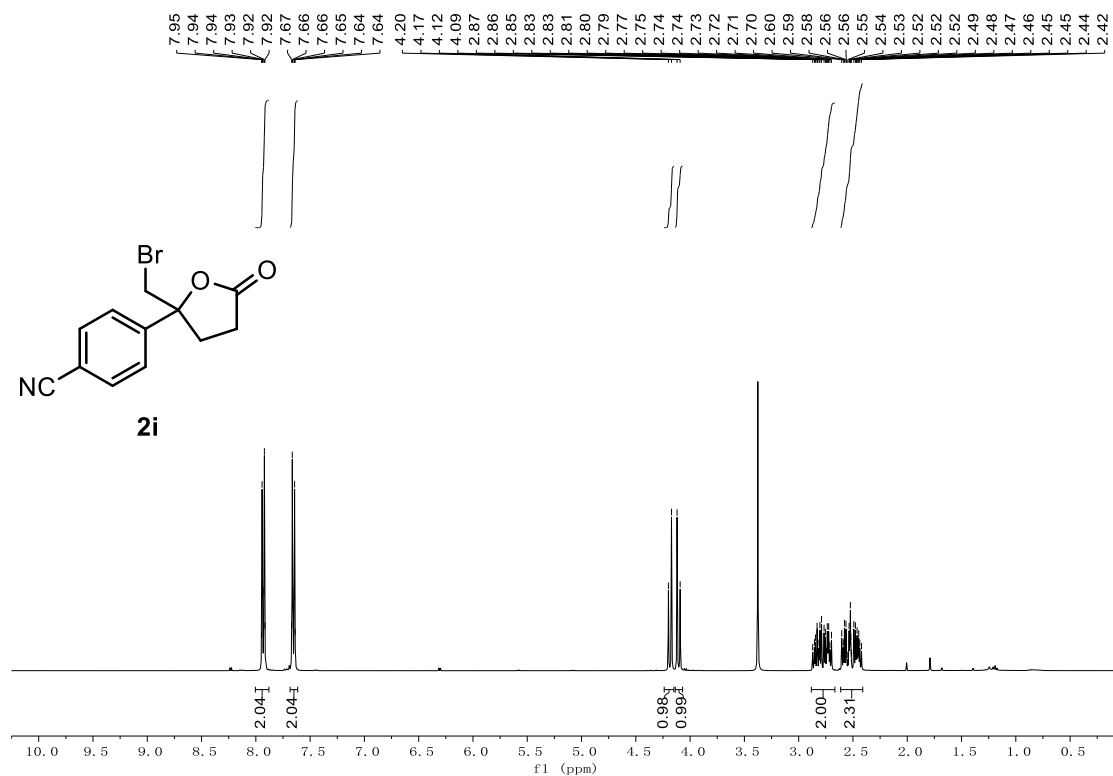

**Figure S53.** <sup>1</sup>H NMR of 4-(2-(bromomethyl)-5-oxotetrahydrofuran-2-yl)benzonitrile (**2i**)

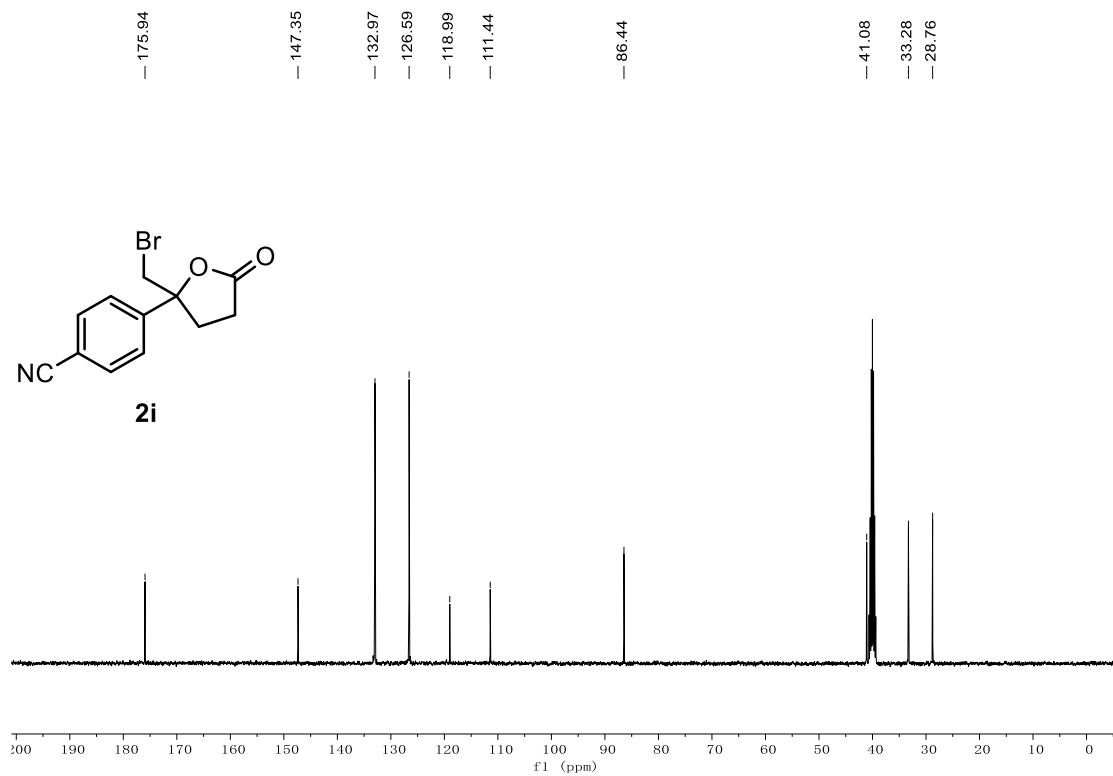

**Figure S54.** <sup>13</sup>C NMR of 4-(2-(bromomethyl)-5-oxotetrahydrofuran-2-yl)benzonitrile (**2i**)

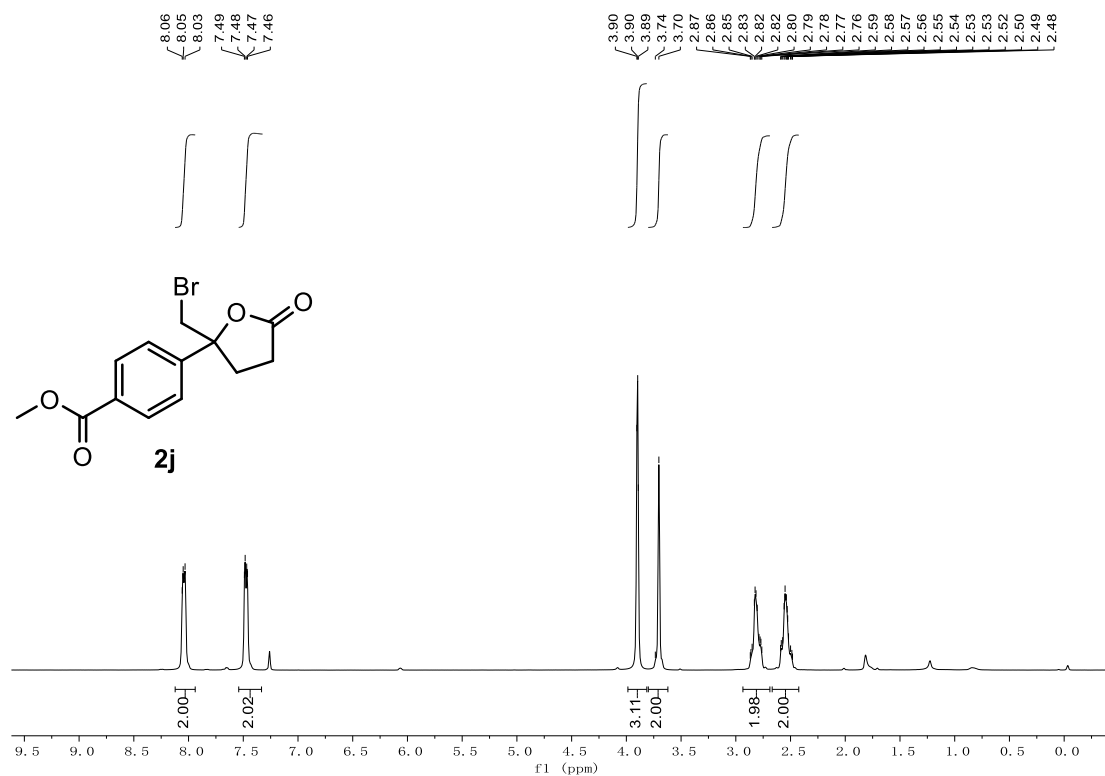

Figure S55. <sup>1</sup>H NMR of methyl 4-(2-(bromomethyl)-5-oxotetrahydrofuran-2-yl) benzoate (**2j**)

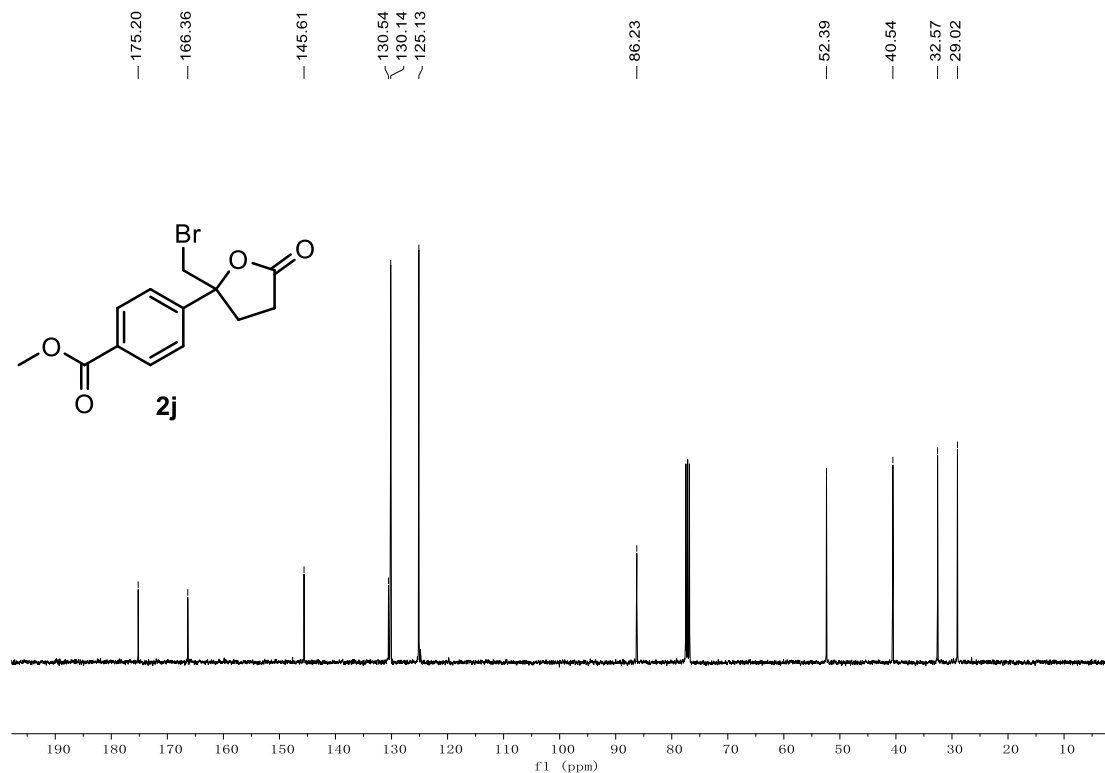

Figure S56. <sup>13</sup>C NMR of methyl 4-(2-(bromomethyl)-5-oxotetrahydrofuran-2-yl) benzoate (**2j**)

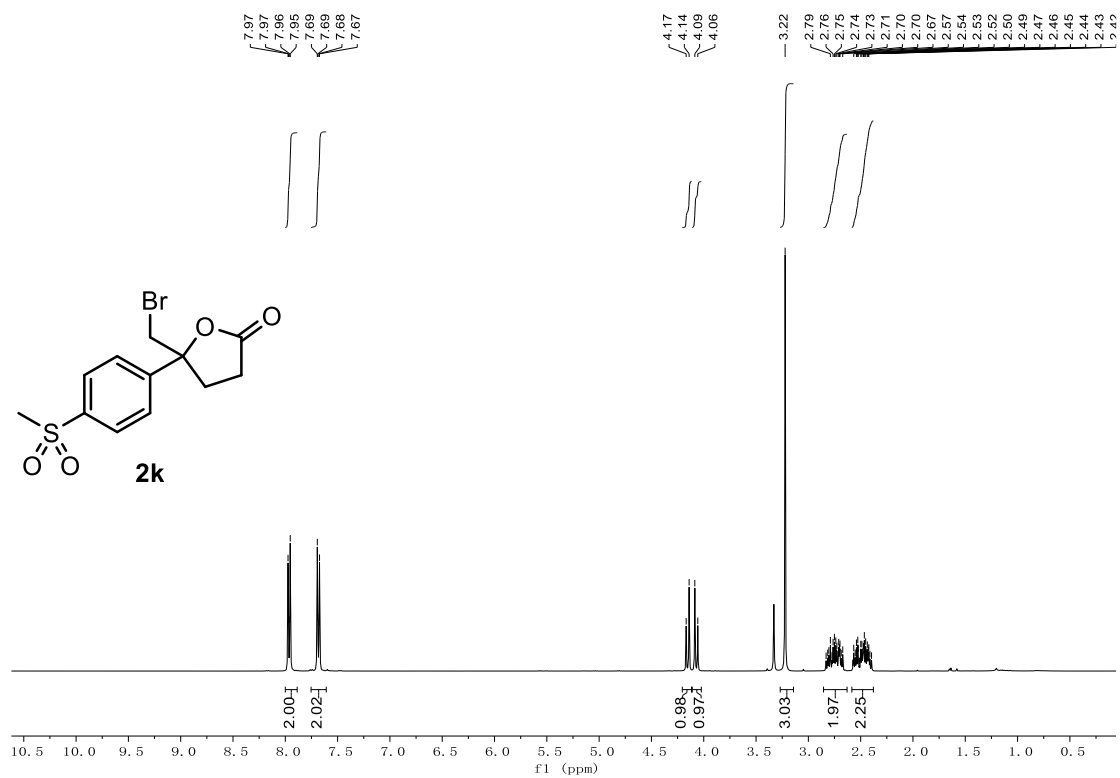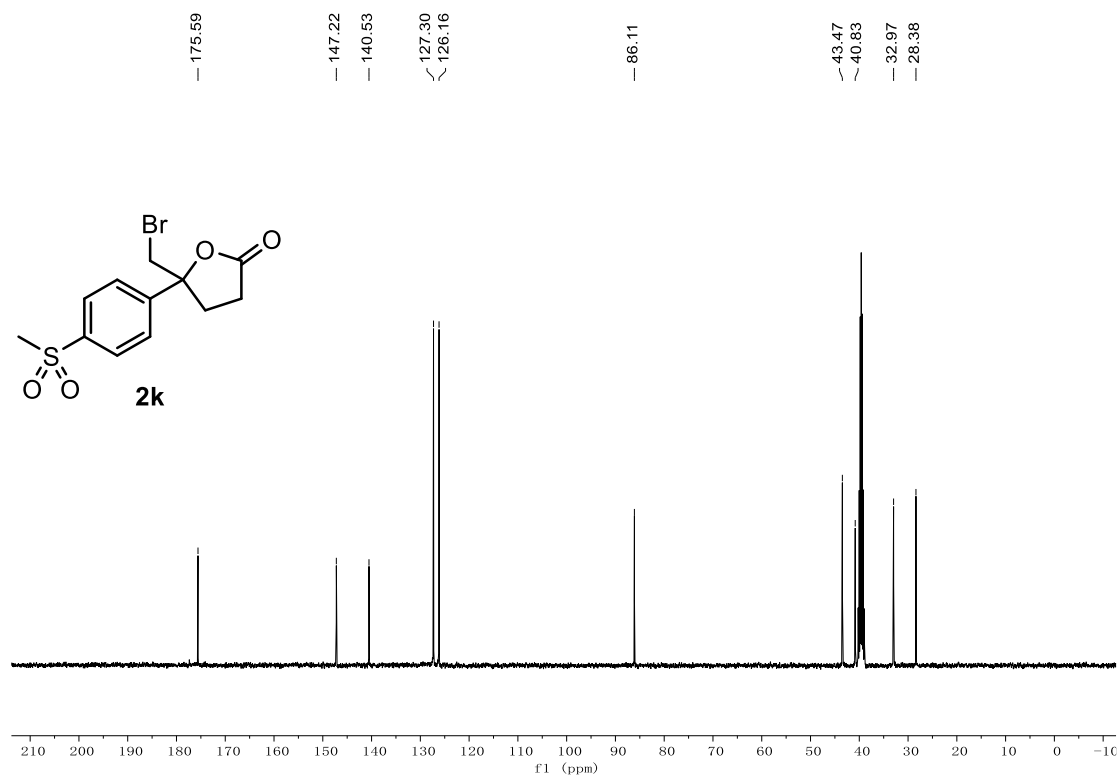

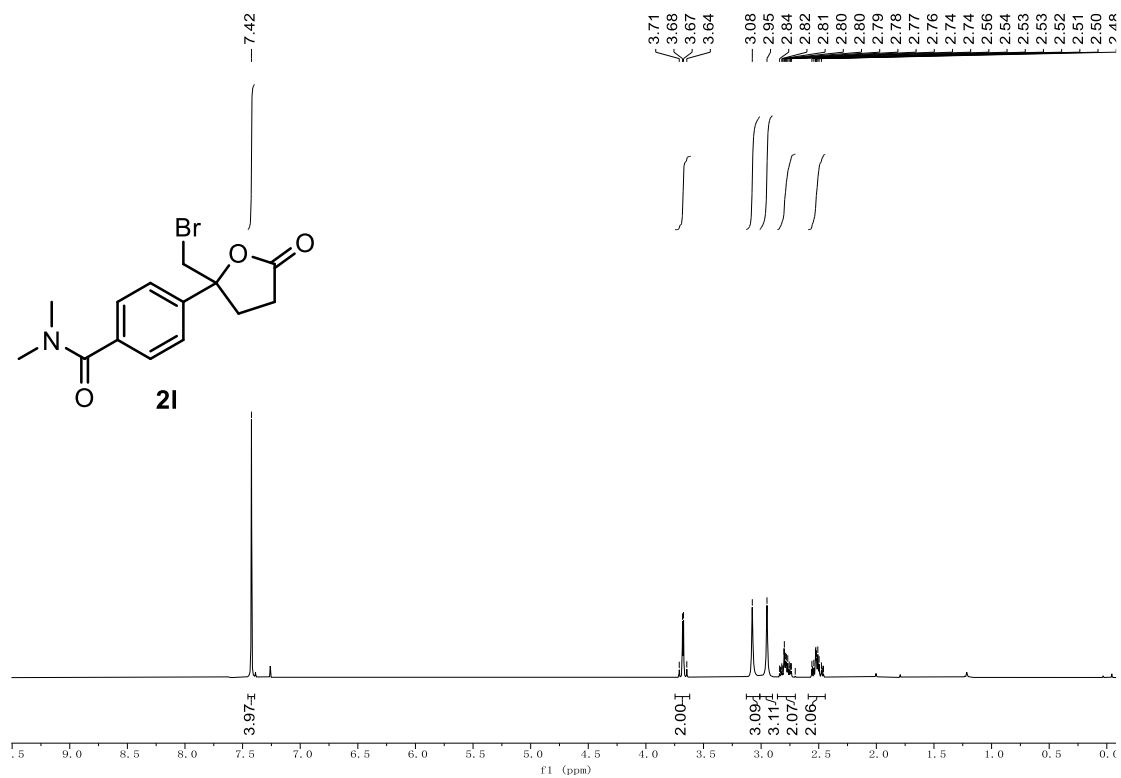

Figure S59. <sup>1</sup>H NMR of 4-(2-(bromomethyl)-5-oxotetrahydrofuran-2-yl)-*N,N*-dimethylbenzamide (**2I**)

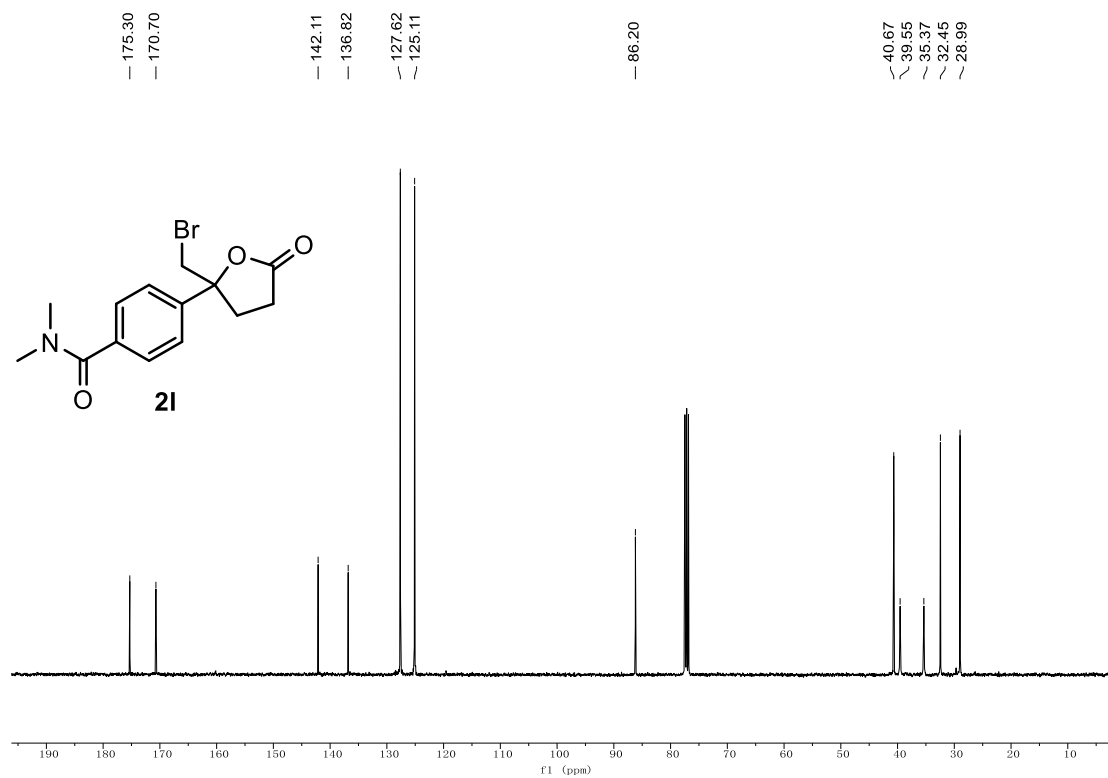

Figure S60. <sup>13</sup>C NMR of 4-(2-(bromomethyl)-5-oxotetrahydrofuran-2-yl)-*N,N*-dimethylbenzamide (**2I**)

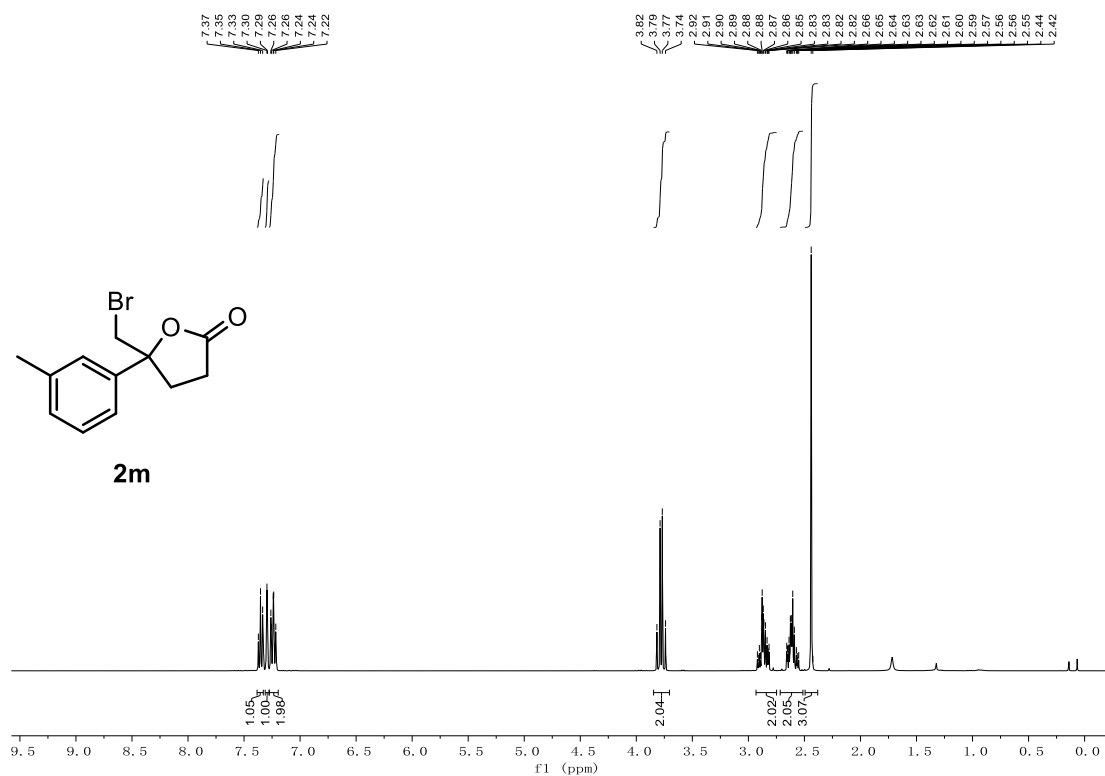

**Figure S61.**  $^1\text{H}$  NMR of 5-(bromomethyl)-5-(m-tolyl)dihydrofuran-2(3H)-one (**2m**)

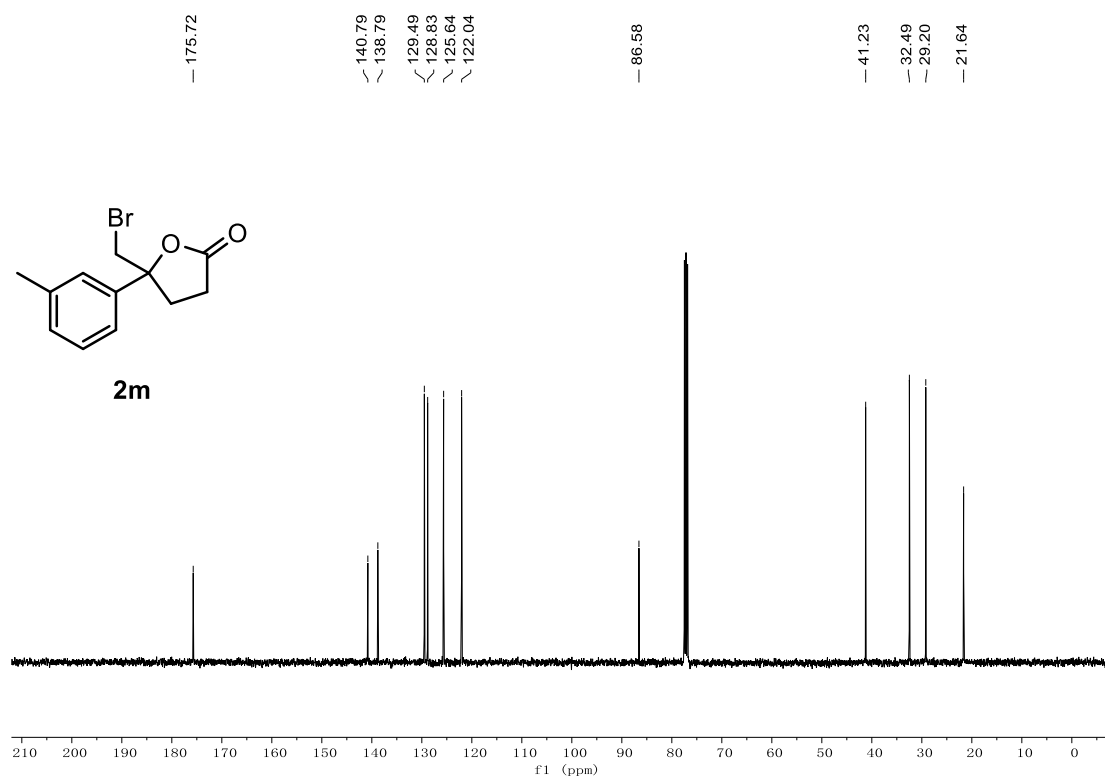

**Figure S62.**  $^{13}\text{C}$  NMR of 5-(bromomethyl)-5-(m-tolyl)dihydrofuran-2(3H)-one (**2m**)



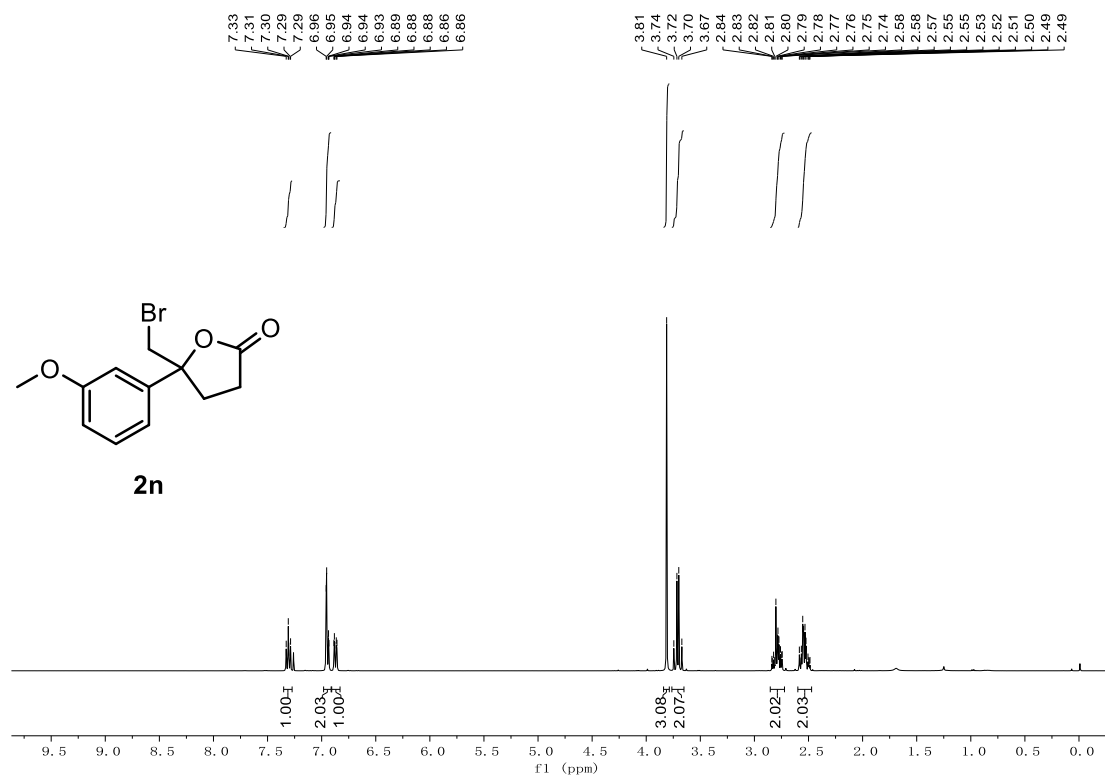

**Figure S63.** <sup>1</sup>H NMR of 5-(bromomethyl)-5-(3-methoxyphenyl)dihydrofuran-2(3H)-one (**2n**)

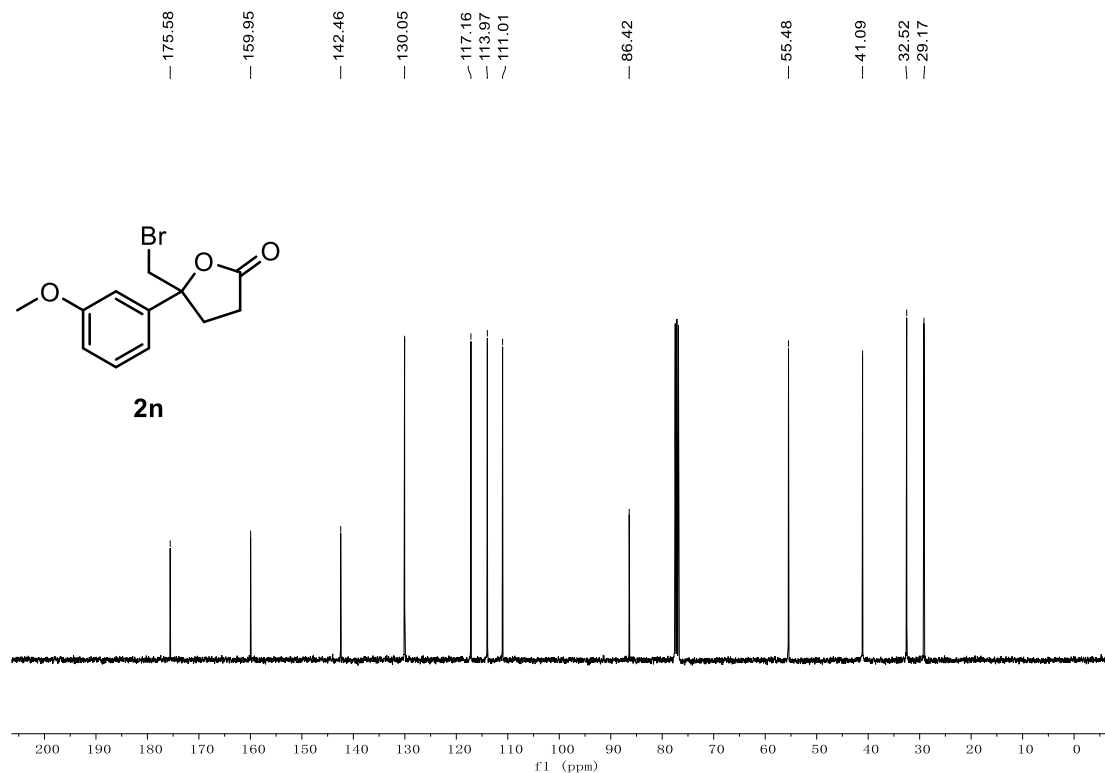

**Figure S64.** <sup>13</sup>C NMR of 5-(bromomethyl)-5-(3-methoxyphenyl)dihydrofuran-2(3H)-one (**2n**)

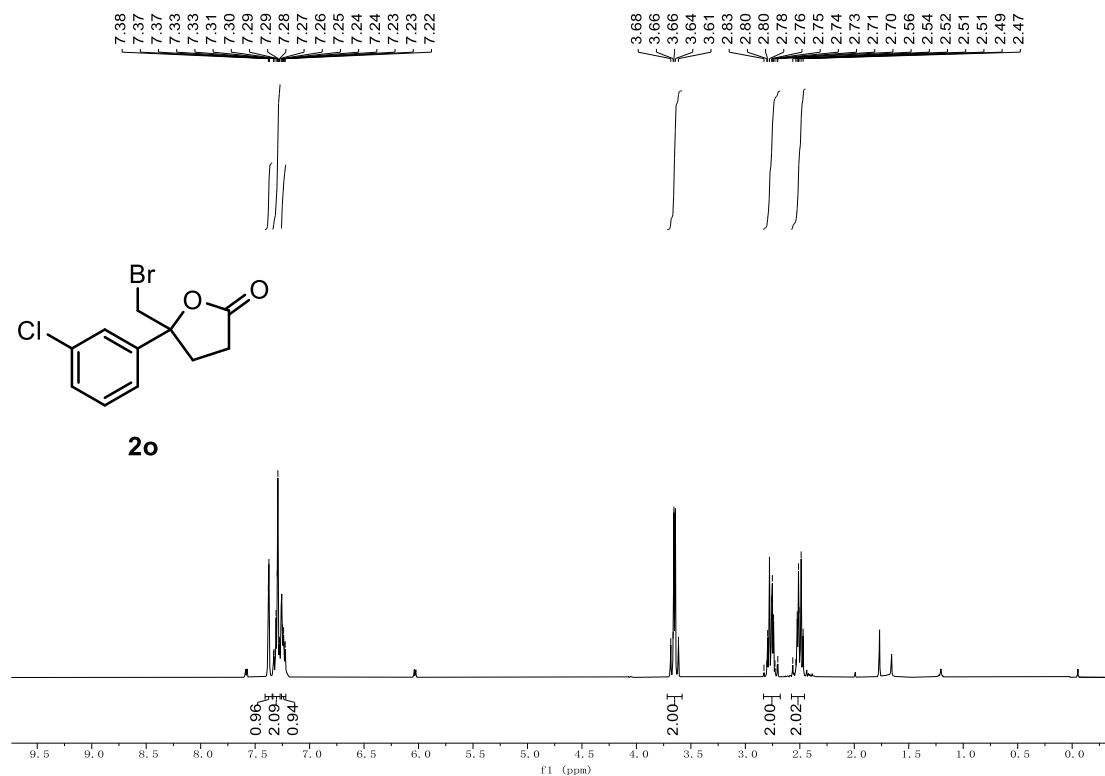

**Figure S65.**  $^1\text{H}$  NMR of 5-(bromomethyl)-5-(3-chlorophenyl)dihydrofuran-2(3H)-one (**2o**)

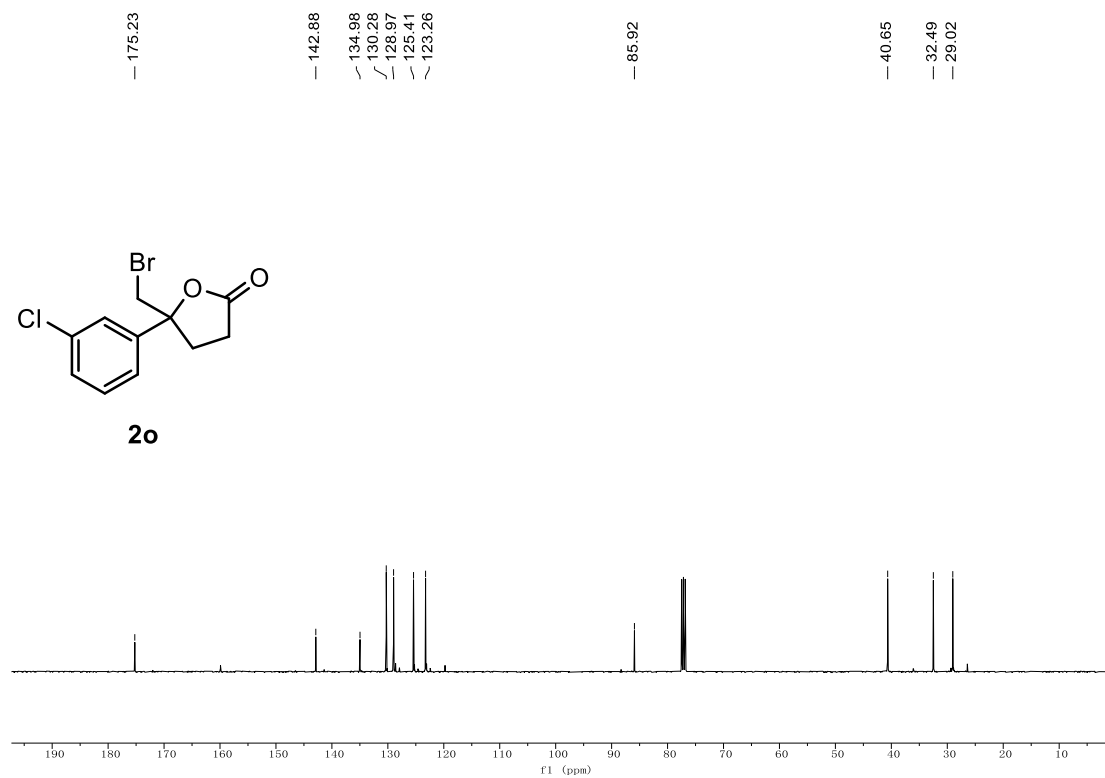

**Figure S66.**  $^{13}\text{C}$  NMR of 5-(bromomethyl)-5-(3-chlorophenyl)dihydrofuran-2(3H)-one (**2o**)

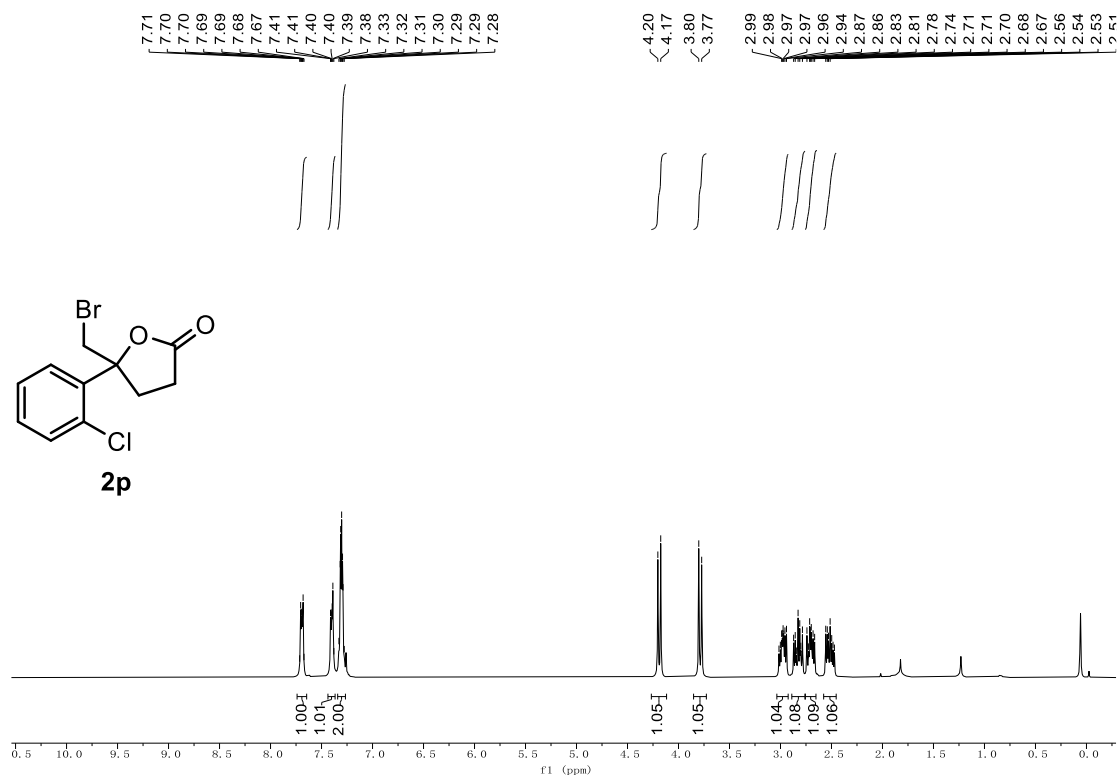

**Figure S67.** <sup>1</sup>H NMR of 5-(bromomethyl)-5-(2-chlorophenyl)dihydrofuran-2(3H)-one (**2p**)

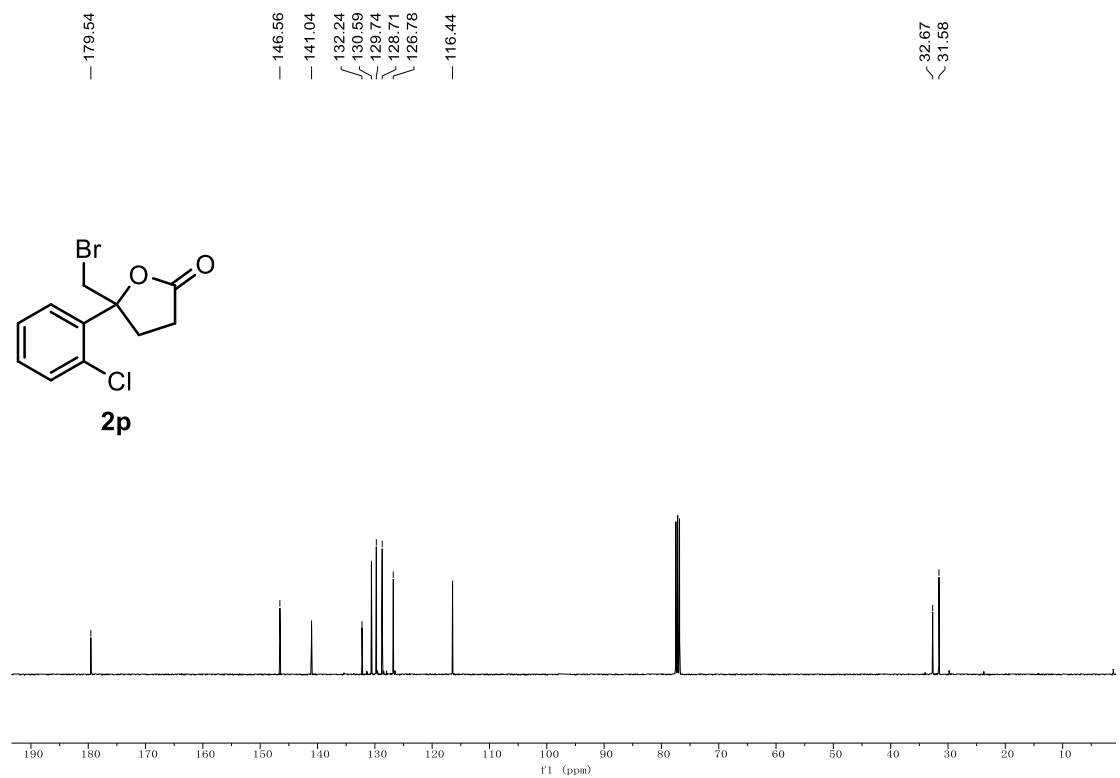

**Figure S68.** <sup>13</sup>C NMR of 5-(bromomethyl)-5-(2-chlorophenyl)dihydrofuran-2(3H)-one (**2p**)

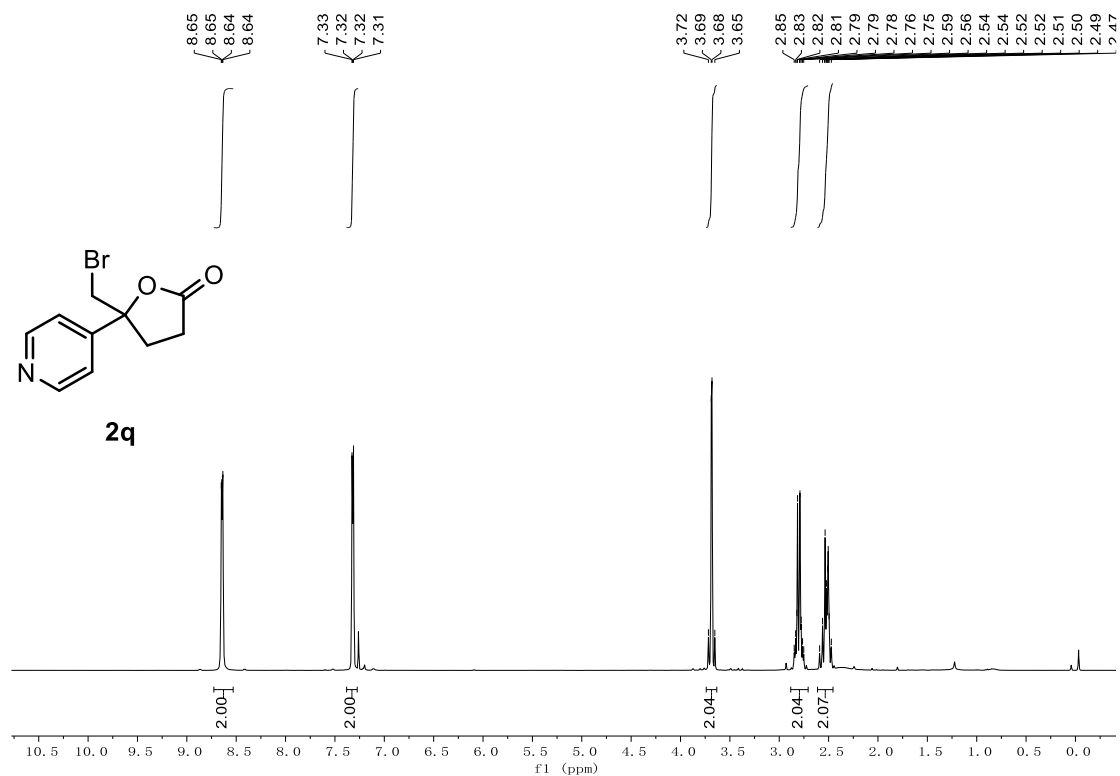

**Figure S69.** <sup>1</sup>H NMR of 5-(bromomethyl)-5-(pyridin-4-yl)dihydrofuran-2(3H)-one (**2q**)

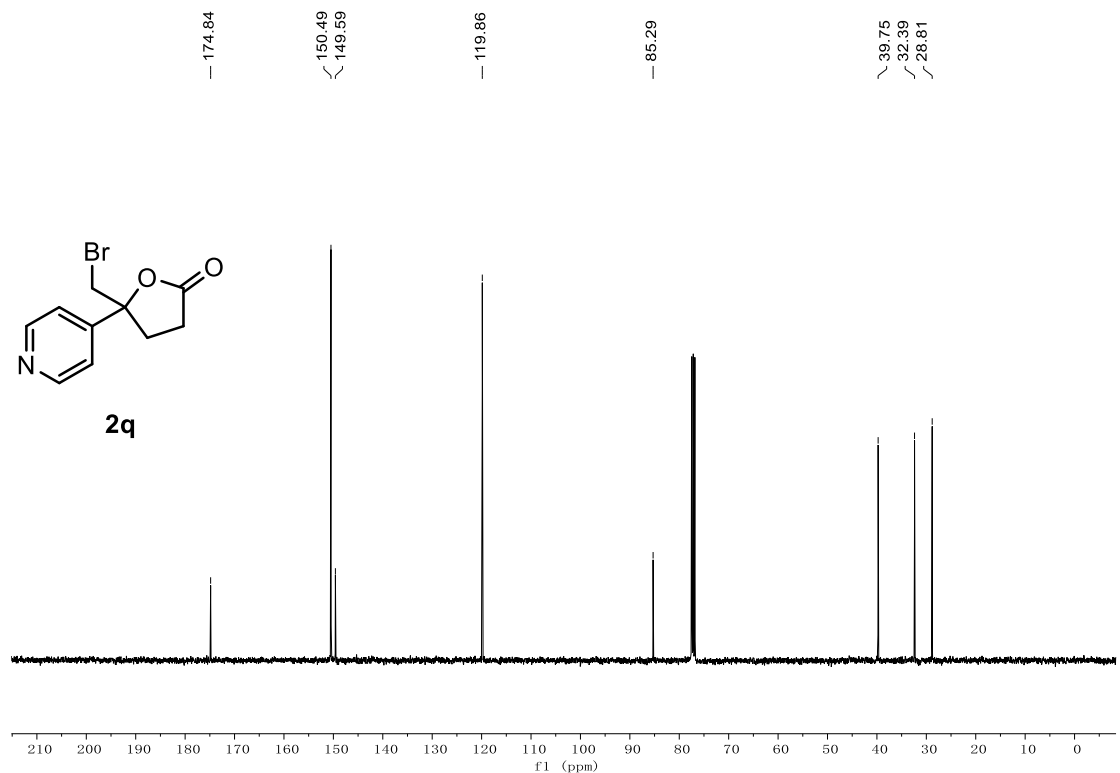

**Figure S70.** <sup>13</sup>C NMR of 5-(bromomethyl)-5-(pyridin-4-yl)dihydrofuran-2(3H)-one (**2q**)

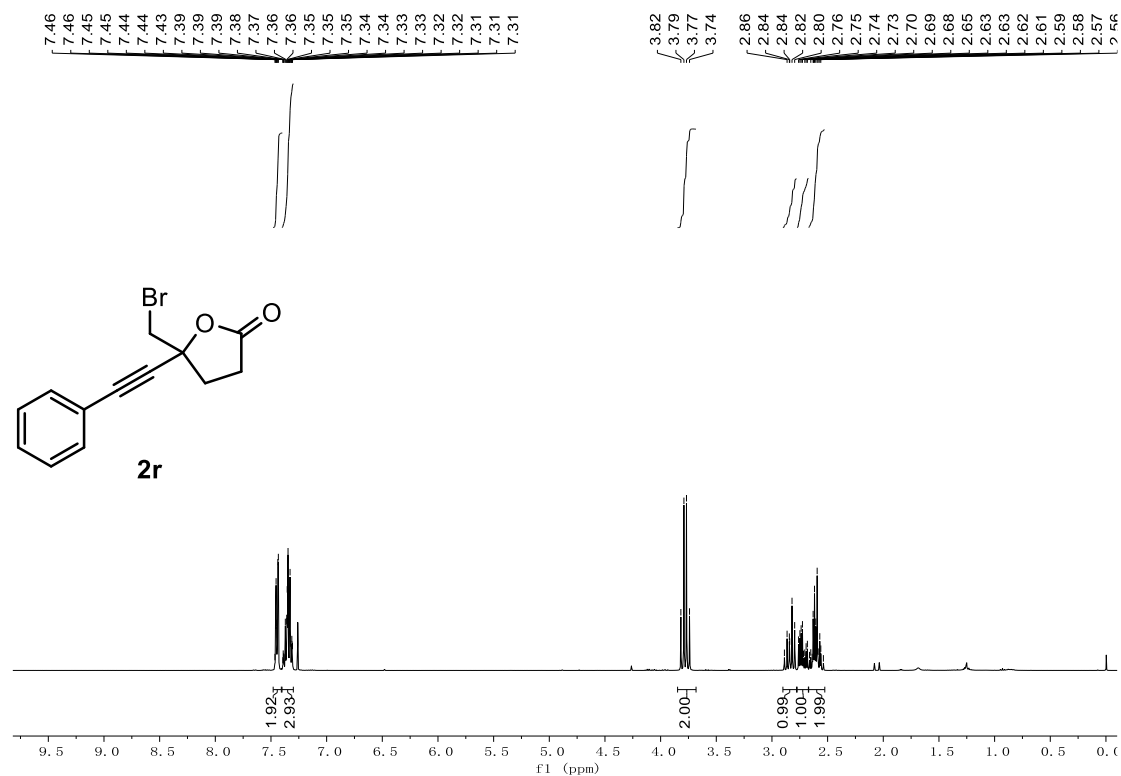

**Figure S71.** <sup>1</sup>H NMR of 5-(bromomethyl)-5-(phenylethynyl)dihydrofuran-2(3H)-one (**2r**)

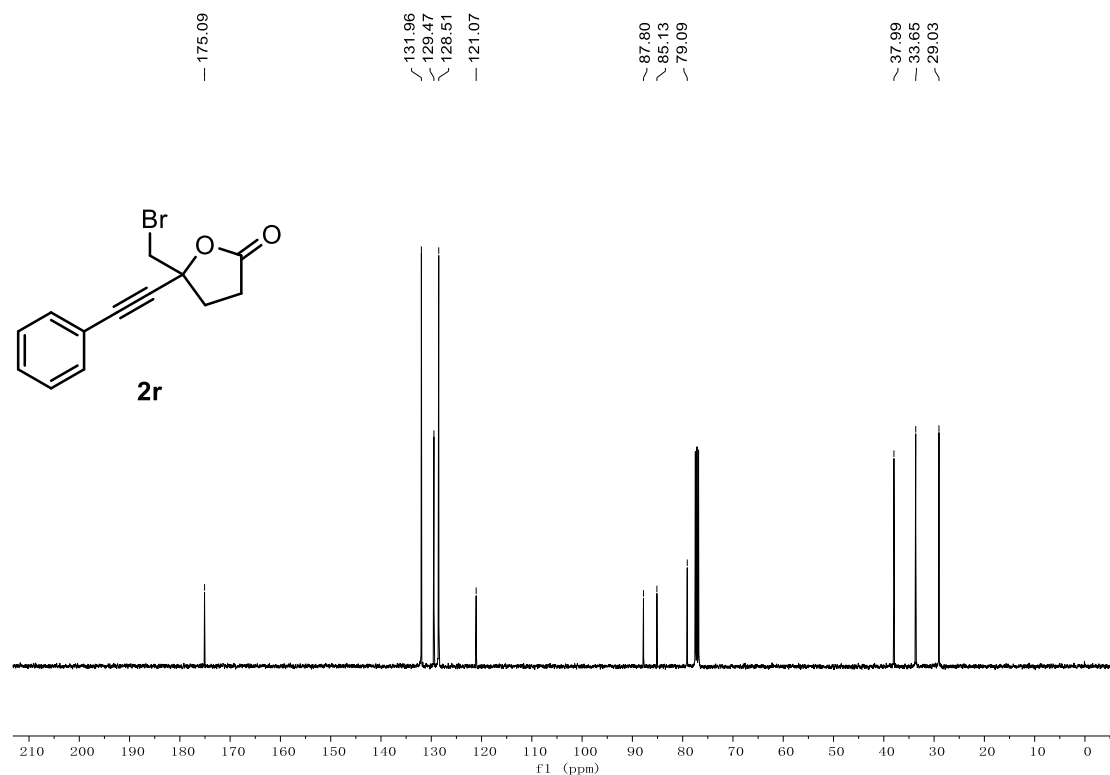

**Figure S72.** <sup>13</sup>C NMR of 5-(bromomethyl)-5-(phenylethynyl)dihydrofuran-2(3H)-one (**2r**)

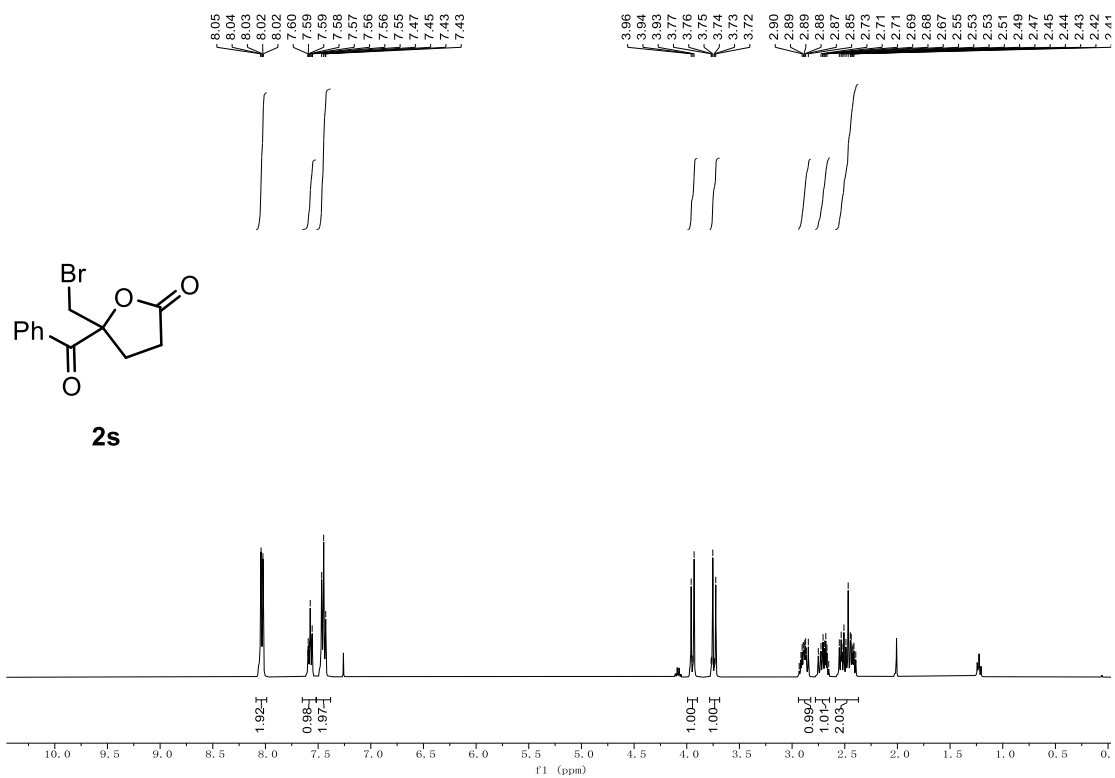

Figure S73. <sup>1</sup>H NMR of 5-benzoyl-5-(bromomethyl)dihydrofuran-2(3H)-one (**2s**)

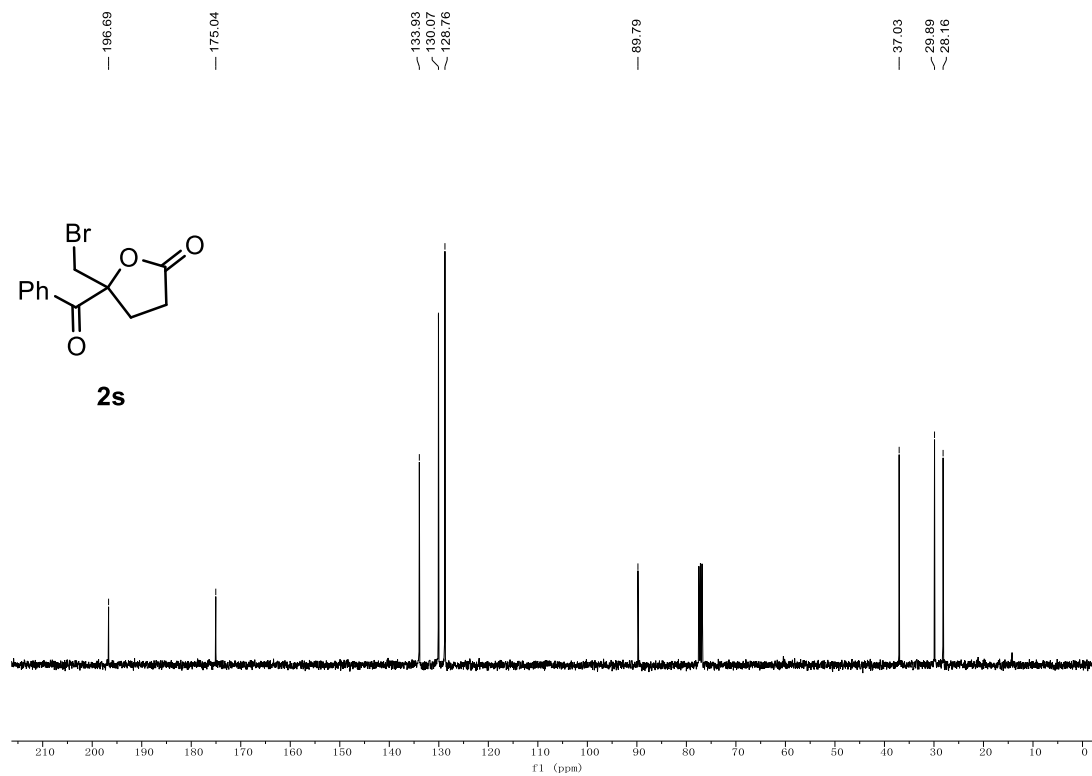

Figure S74. <sup>13</sup>C NMR of 5-benzoyl-5-(bromomethyl)dihydrofuran-2(3H)-one (**2s**)

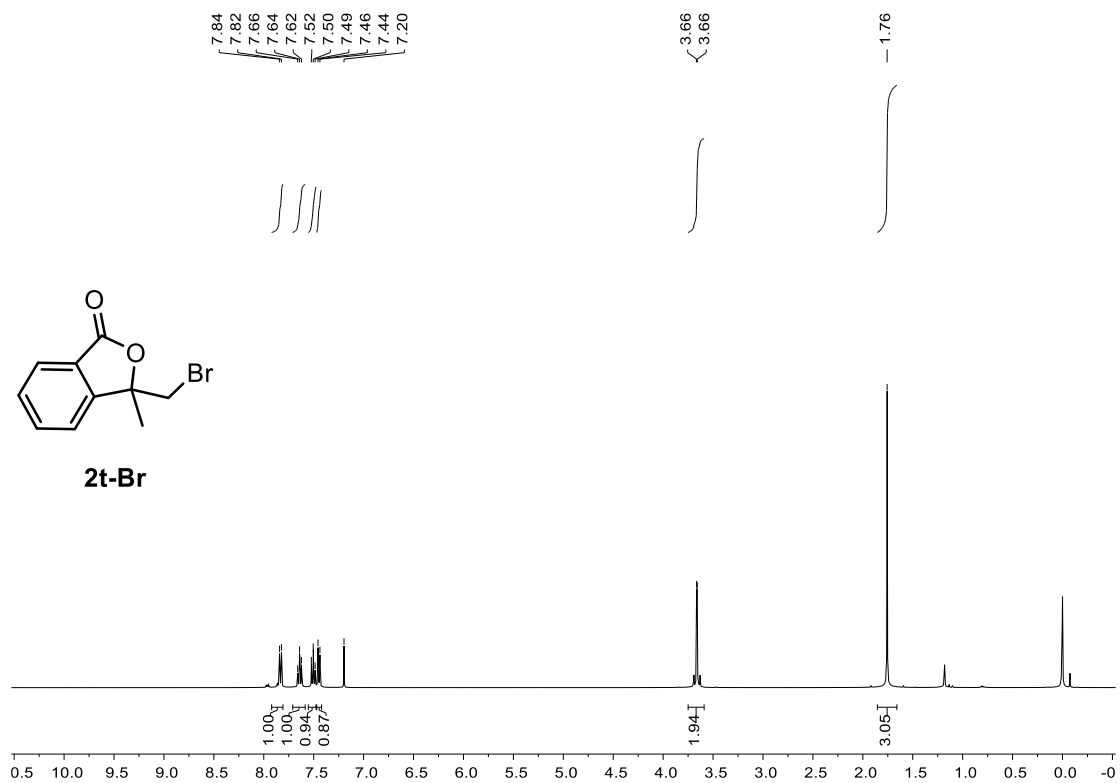

Figure S75. <sup>1</sup>H NMR of 3-(bromomethyl)-3-methylisobenzofuran-1(3H)-one (**2t-Br**)

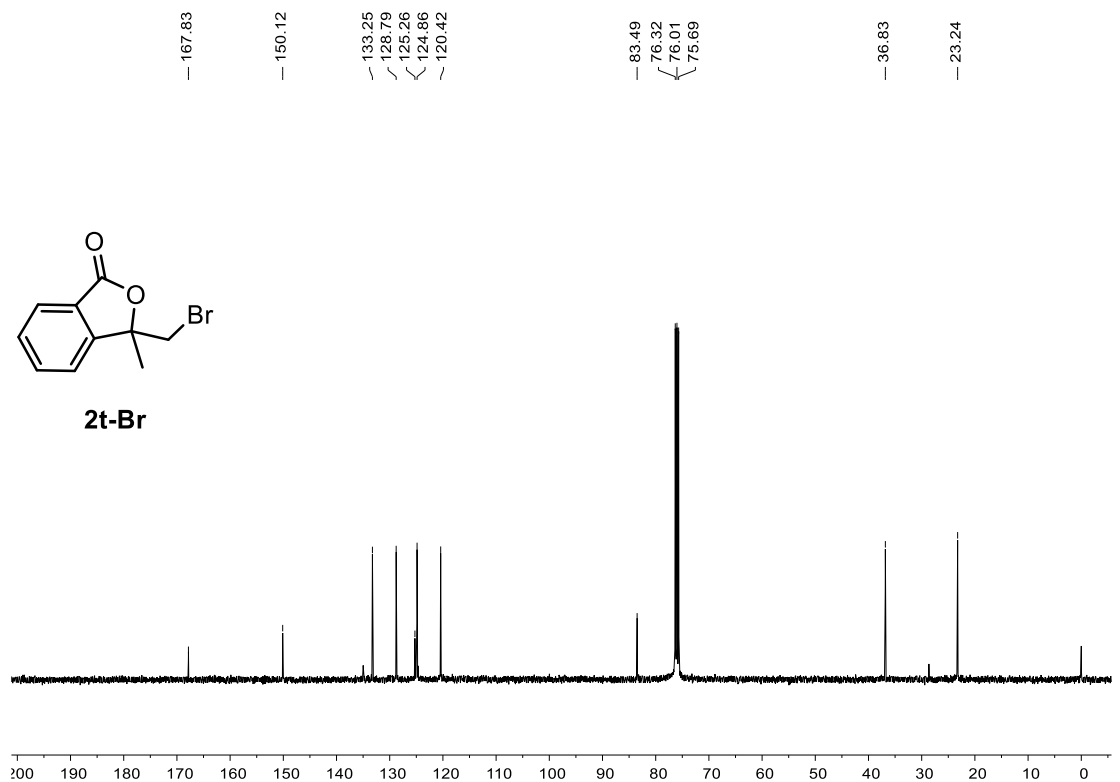

Figure S76. <sup>13</sup>C NMR of 3-(bromomethyl)-3-methylisobenzofuran-1(3H)-one (**2t-Br**)

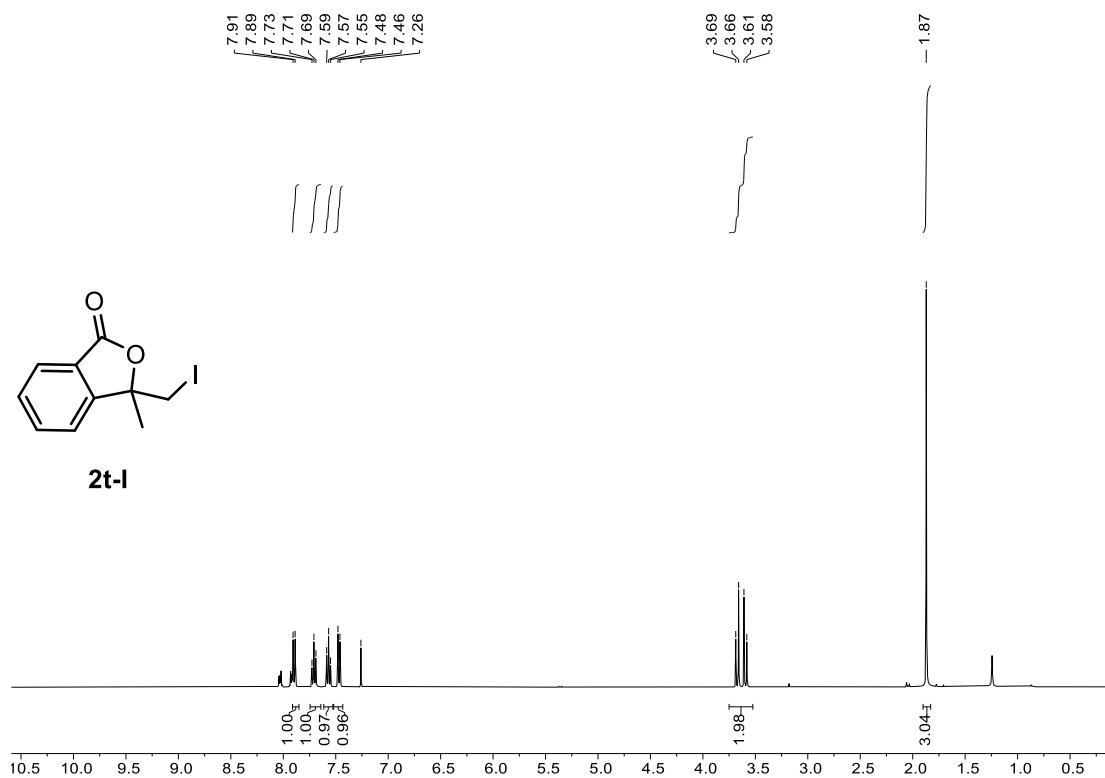

**Figure S77.** <sup>1</sup>H NMR of 3-(bromomethyl)-3-methylisobenzofuran-1(3H)-one (**2t-I**)

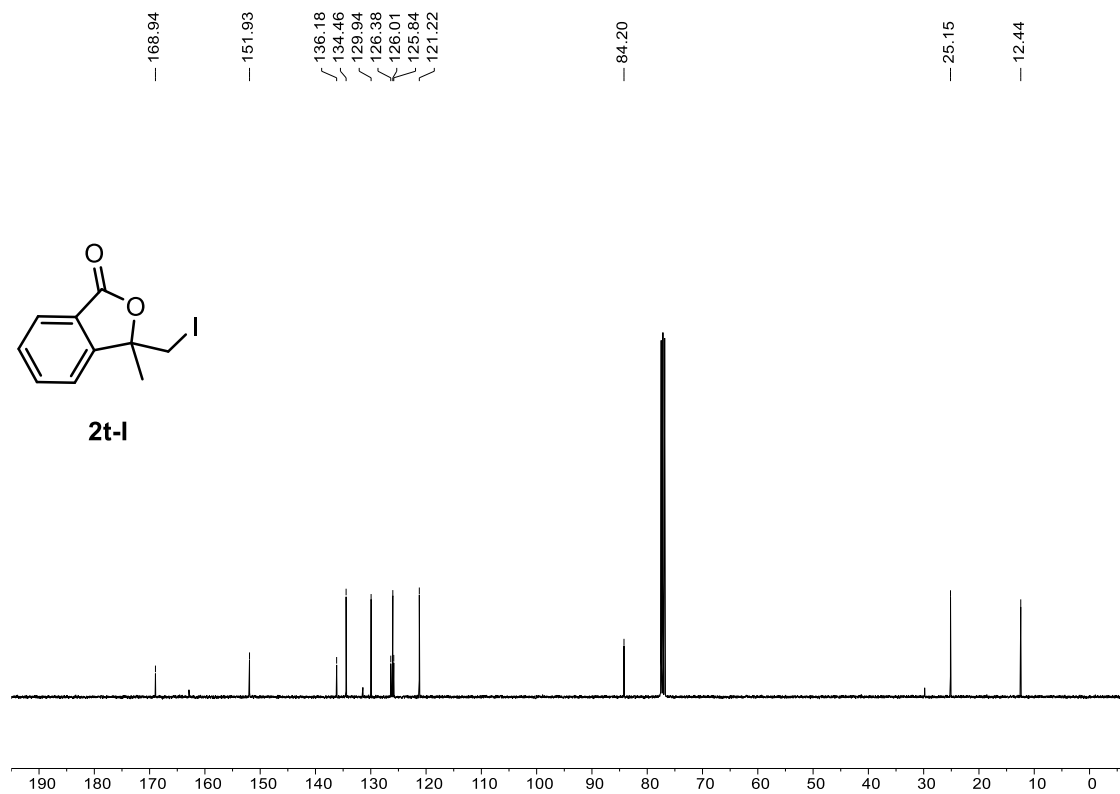

**Figure S78.** <sup>13</sup>C NMR of 3-(bromomethyl)-3-methylisobenzofuran-1(3H)-one (**2t-I**)



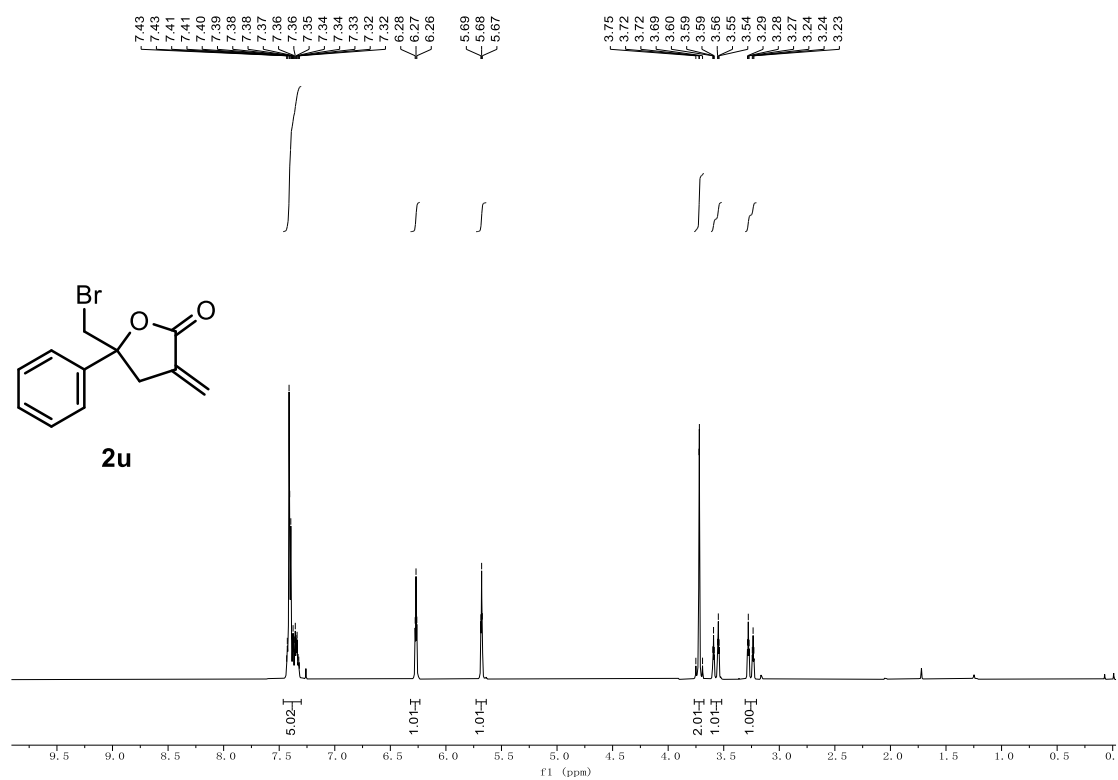

**Figure S79.** <sup>1</sup>H NMR of 5-(bromomethyl)-3-methylene-5-phenyldihydrofuran-2(3H)-one (**2u**)

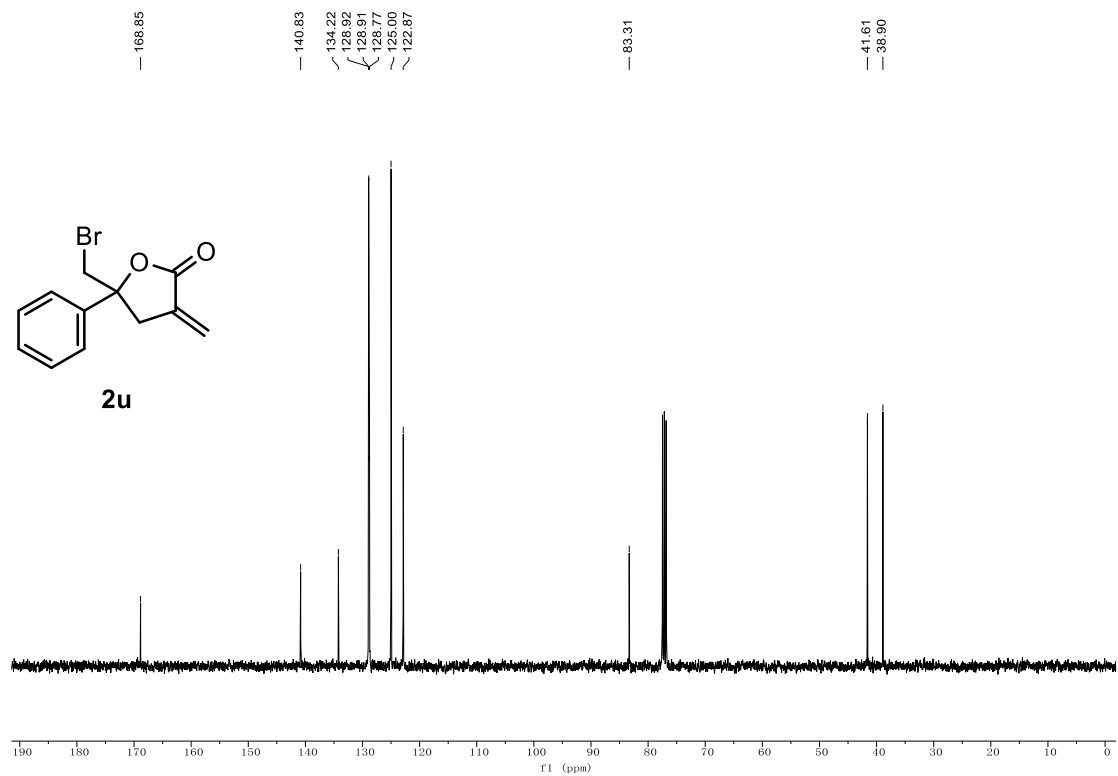

**Figure S80.** <sup>13</sup>C NMR of 5-(bromomethyl)-3-methylene-5-phenyldihydrofuran-2(3H)-one (**2u**)

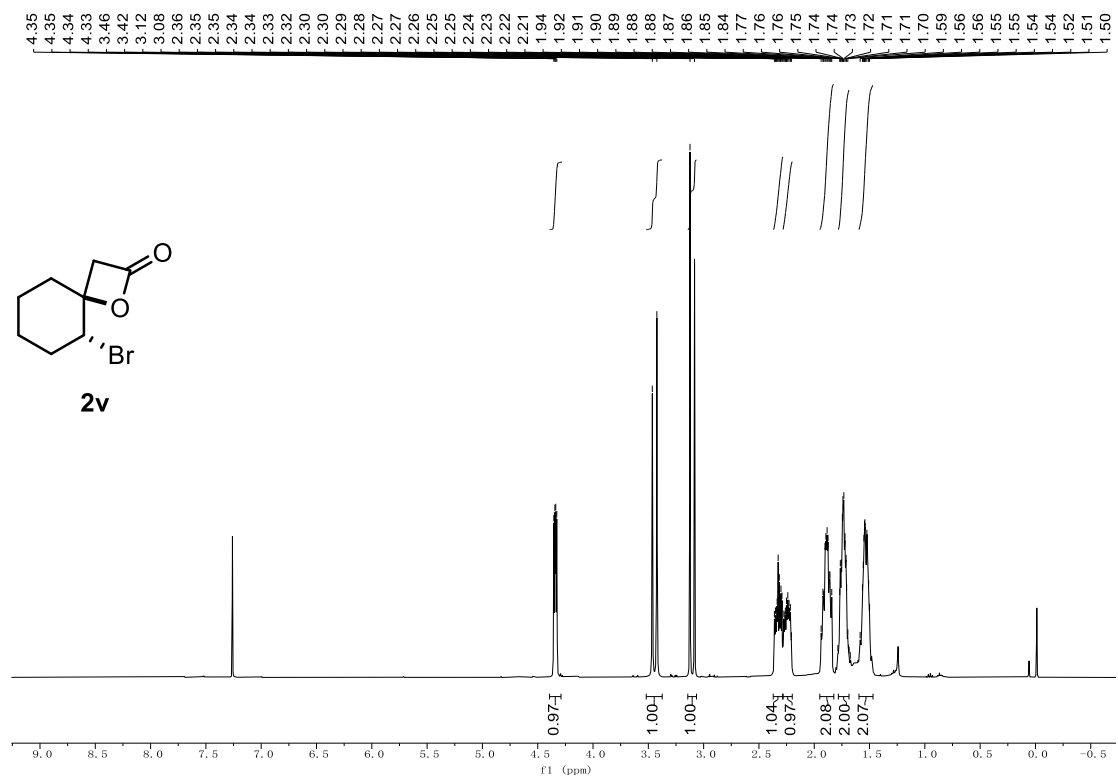

Figure S81. <sup>1</sup>H NMR of 5-bromo-1-oxaspiro[3.5]nonan-2-one (2v)

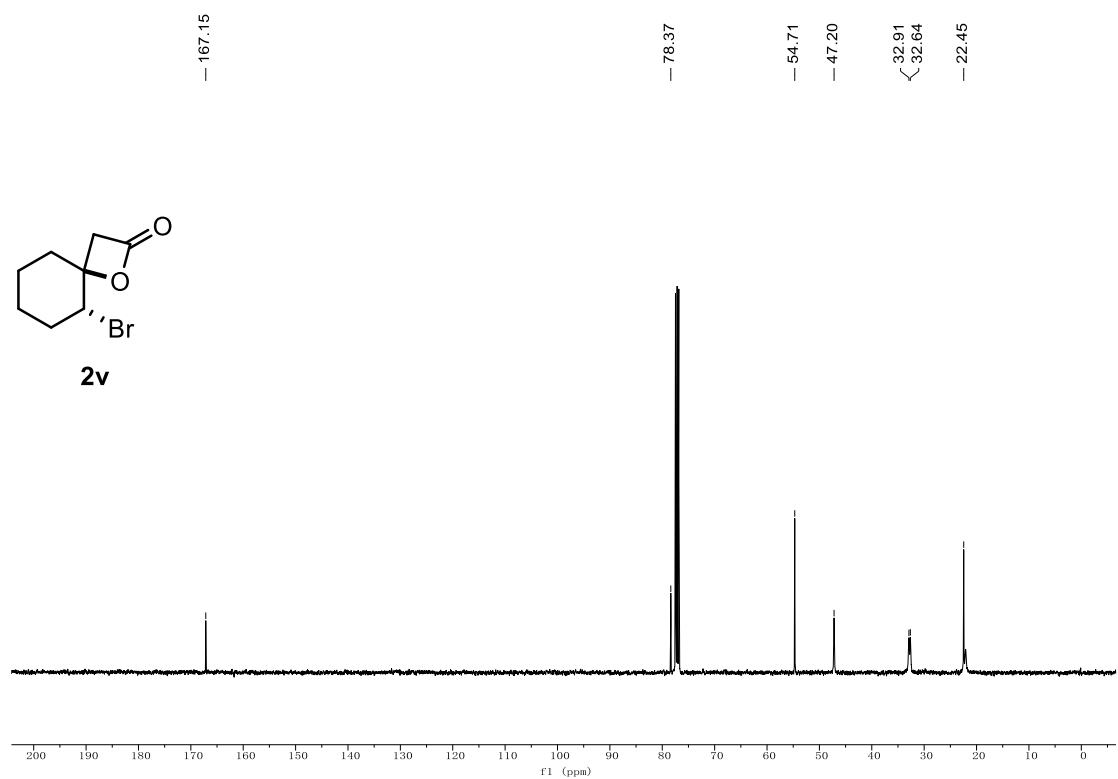

Figure S82. <sup>13</sup>C NMR of 5-bromo-1-oxaspiro[3.5]nonan-2-one (2v)

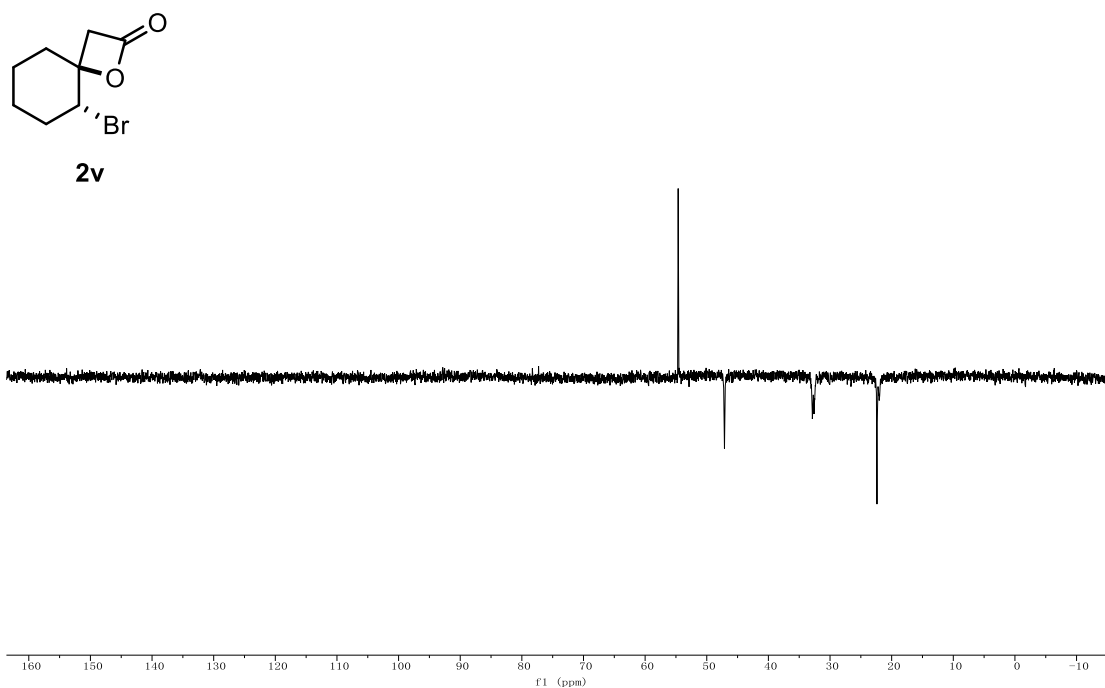

Figure S83. DEPT 135 of 5-bromo-1-oxaspiro[3.5]nonan-2-one (**2v**)

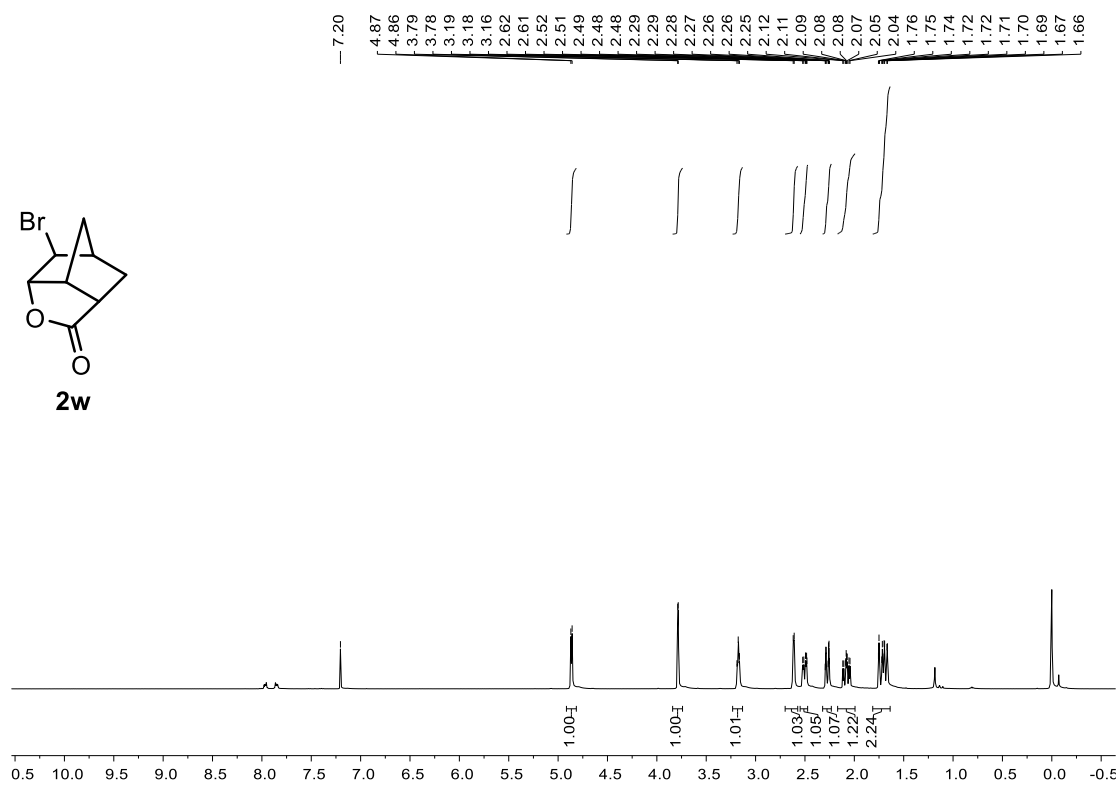

Figure S84.  $^1\text{H}$  NMR of 6-bromohexahydro-2H-3,5-methanocyclopenta[b]furan-2-one (**2w**)

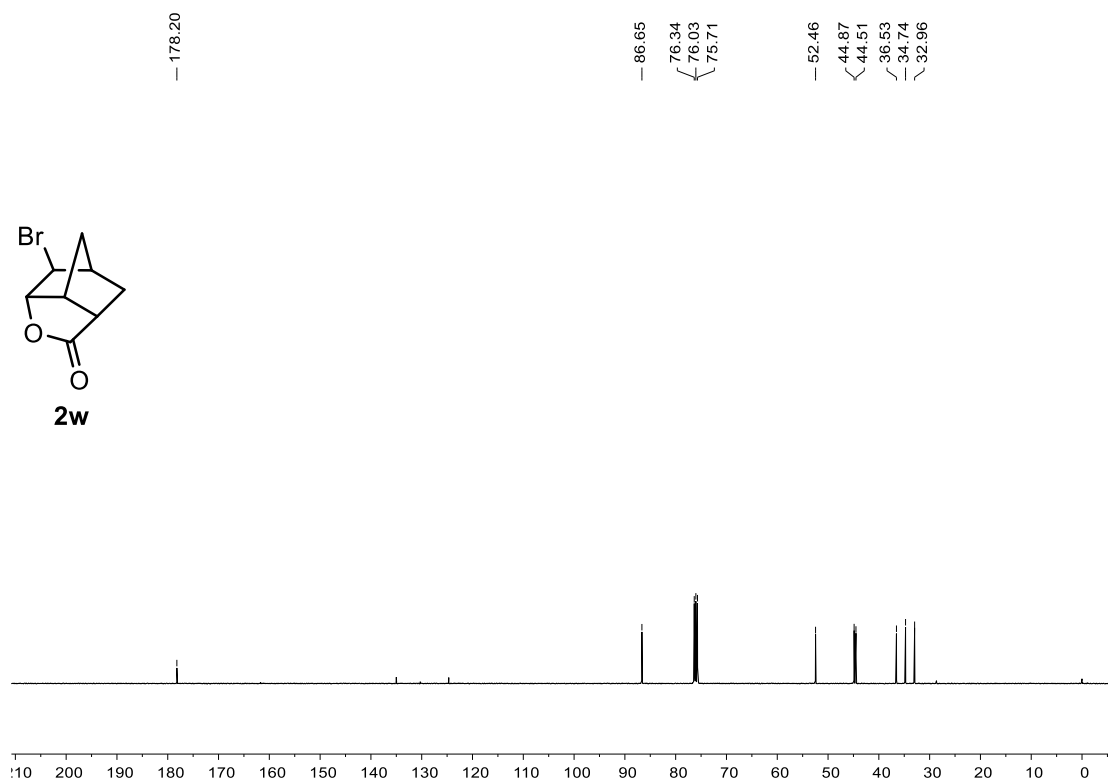

Figure S85. <sup>13</sup>C NMR of 6-bromohexahydro-2*H*-3,5-methanocyclopenta[*b*]furan-2-one (**2w**)

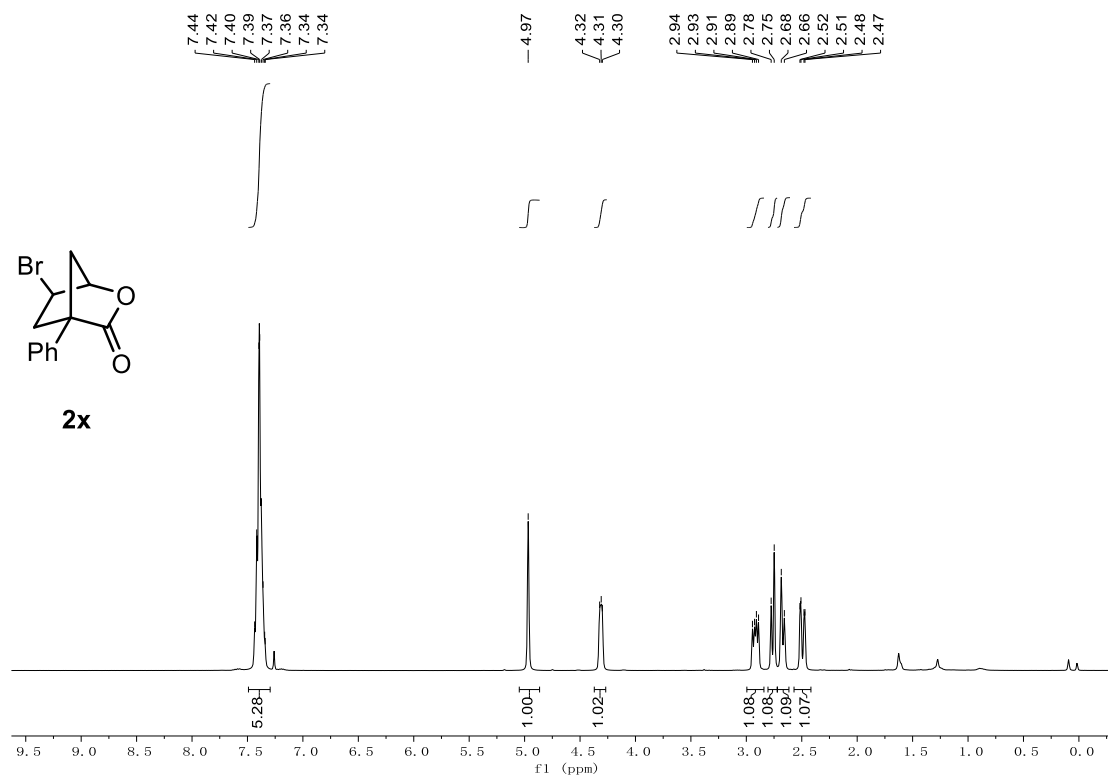

Figure S86. <sup>1</sup>H NMR of 6-bromo-4-phenyl-2-oxabicyclo[2.2.1]heptan-3-one (**2x**)

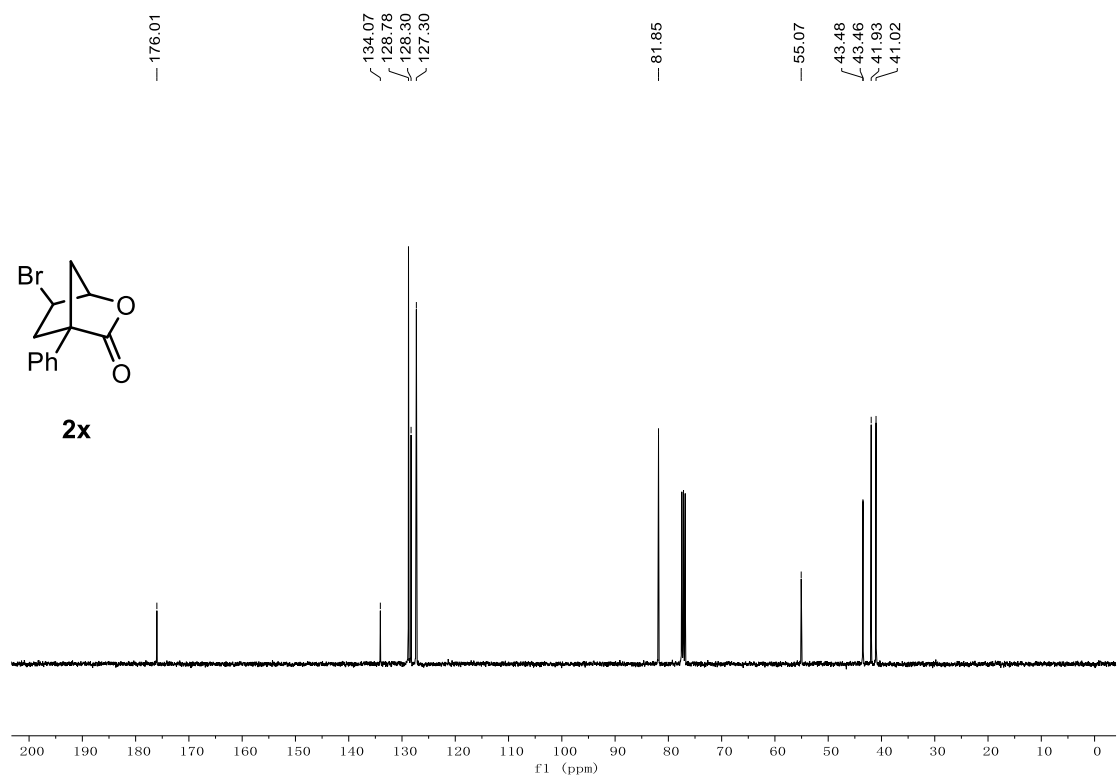

Figure S87.  $^{13}\text{C}$  NMR of 6-bromo-4-phenyl-2-oxabicyclo[2.2.1]heptan-3-one (**2x**)

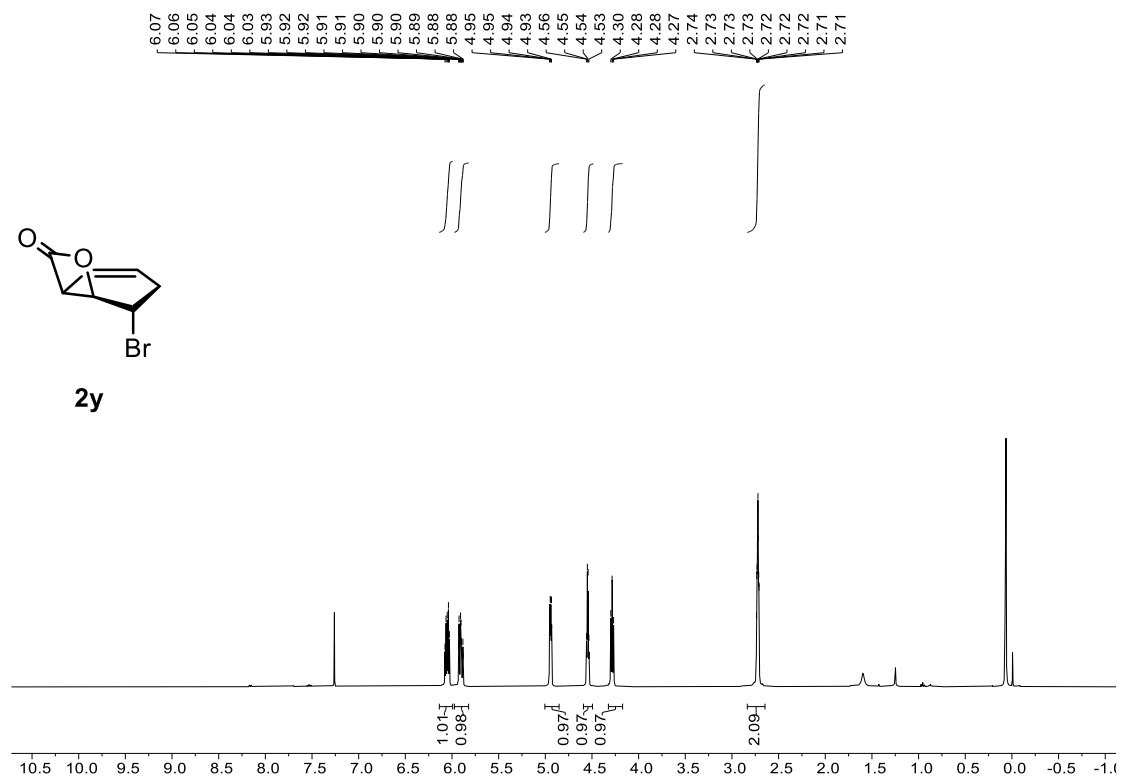

Figure S88.  $^1\text{H}$  NMR of 5-bromo-7-oxabicyclo[4.2.0]oct-2-en-8-one (**2y**)

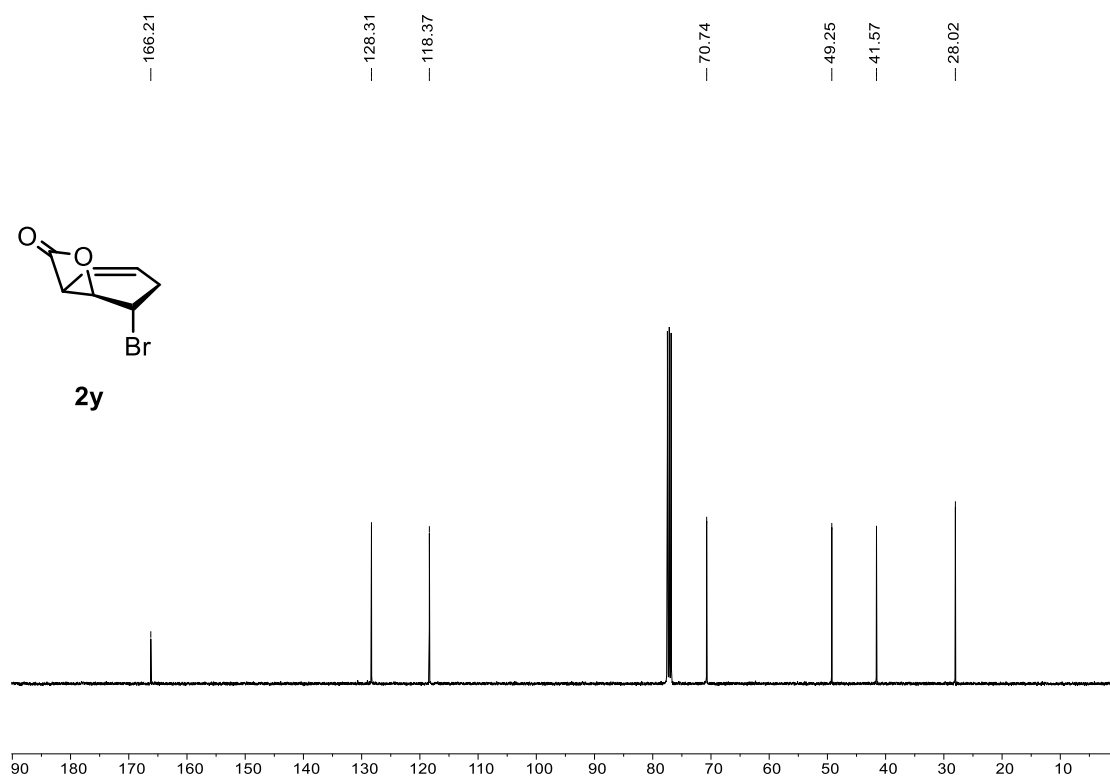

Figure S89.  $^{13}\text{C}$  NMR of 5-bromo-7-oxabicyclo[4.2.0]oct-2-en-8-one (**2y**)

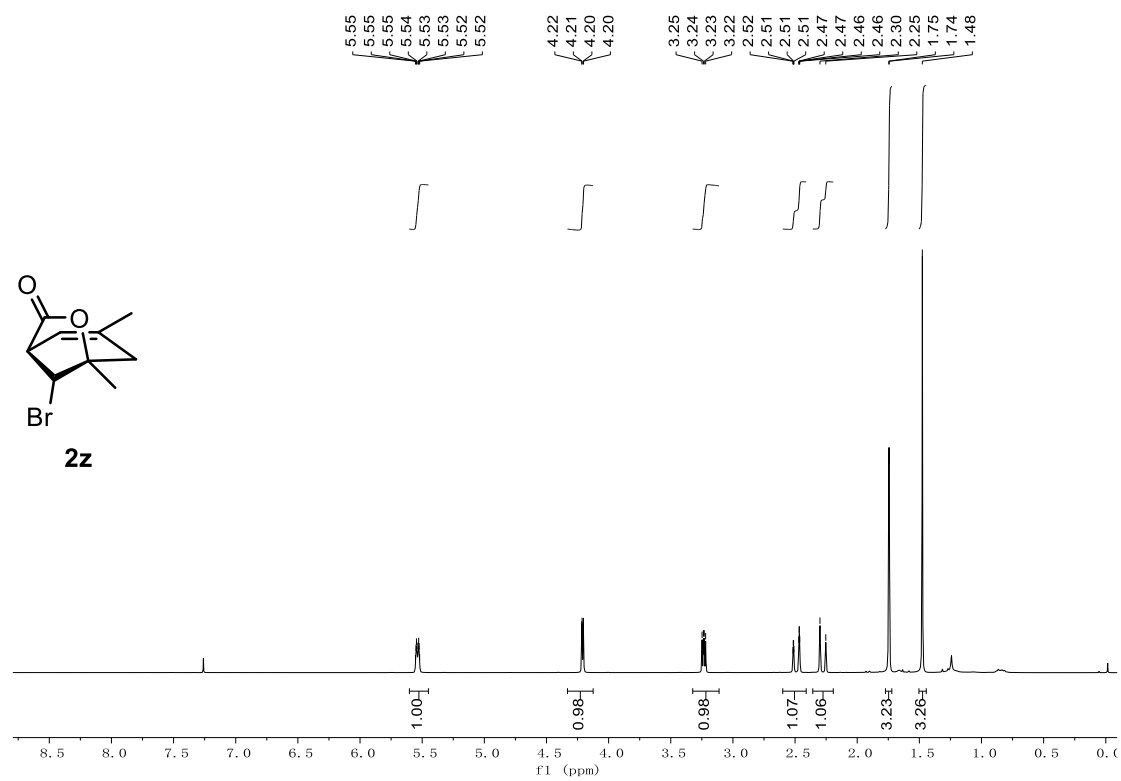

Figure S90.  $^1\text{H}$  NMR of 8-bromo-3,5-dimethyl-6-oxabicyclo[3.2.1]oct-2-en-7-one (**2z**)

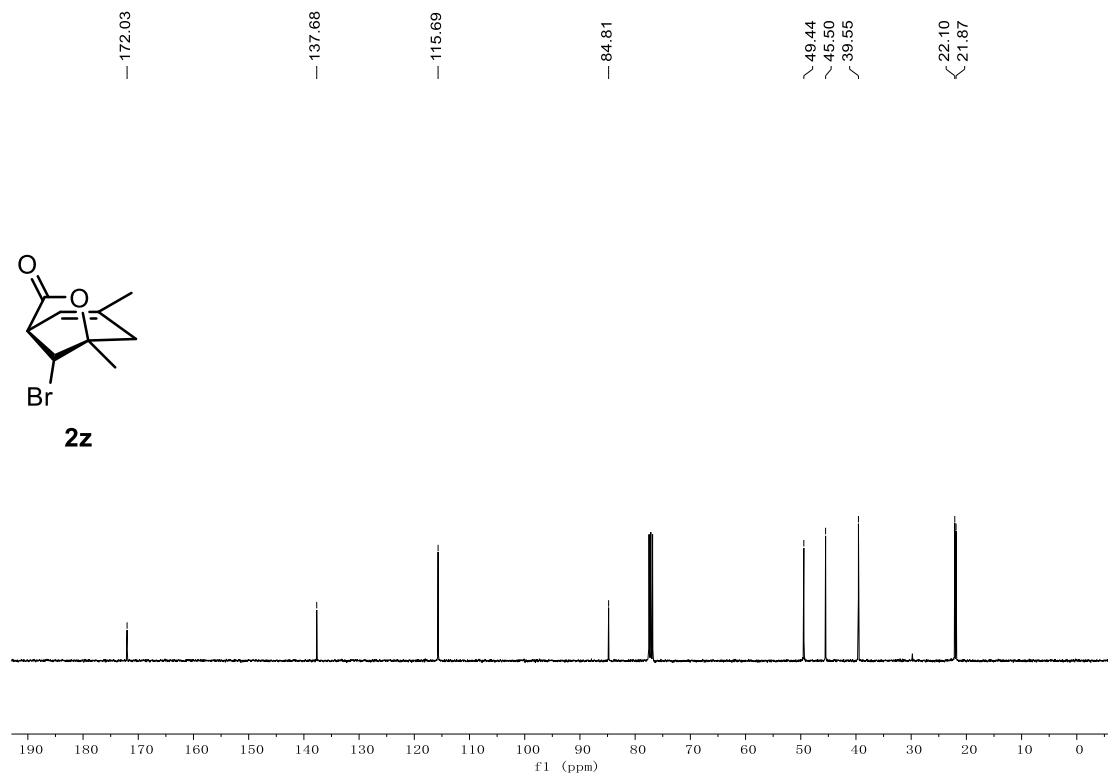

Figure S91.  $^{13}\text{C}$  NMR of 8-bromo-3,5-dimethyl-6-oxabicyclo[3.2.1]oct-2-en-7-one (**2z**)

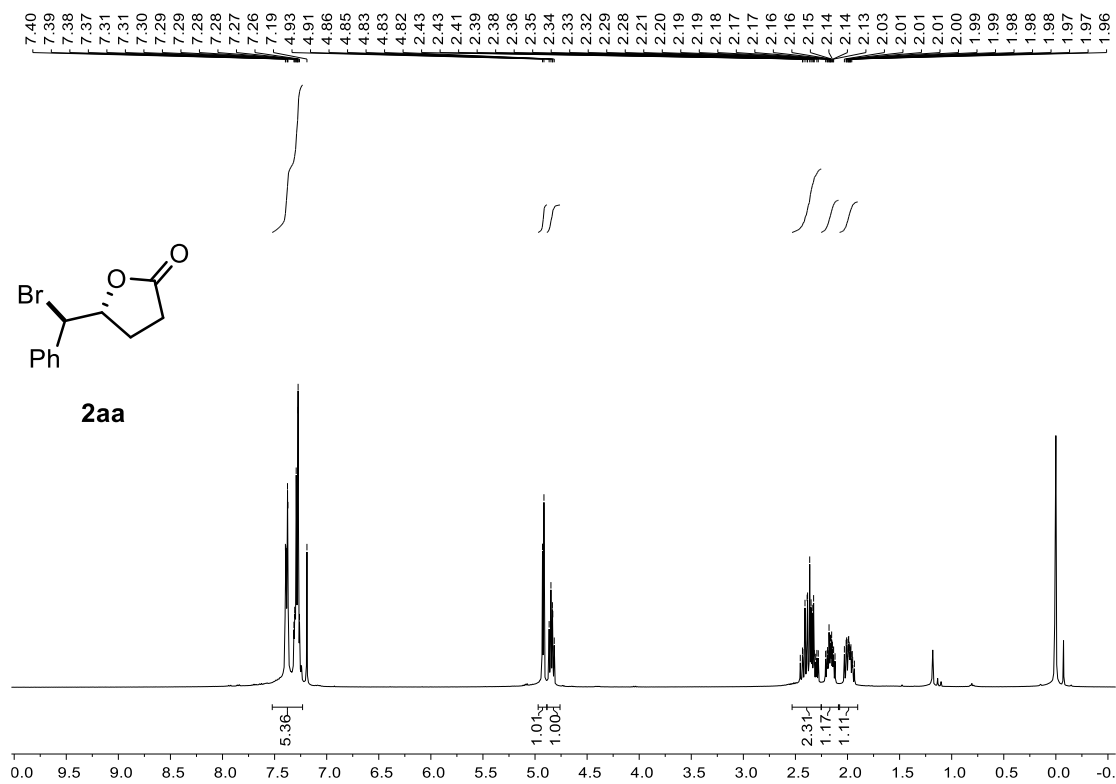

Figure S92.  $^1\text{H}$  NMR of 5-(bromo(phenyl)methyl)dihydrofuran-2(3H)-one (**2aa**)

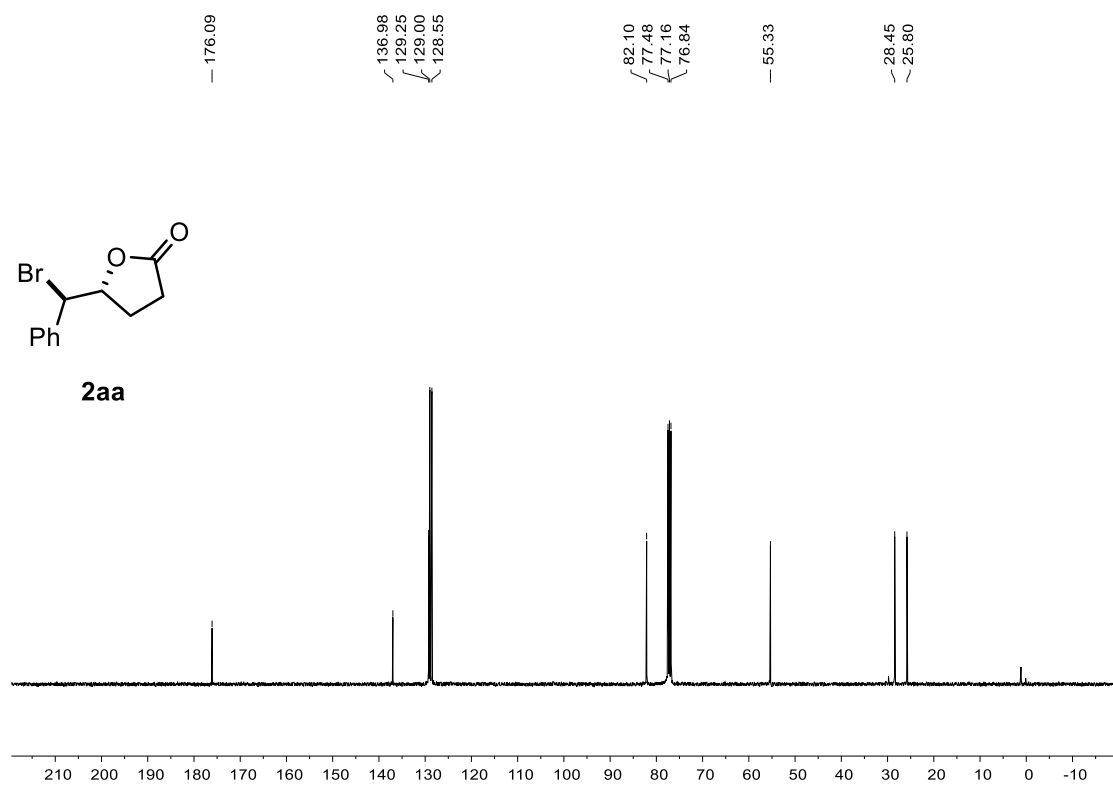

Figure S93. <sup>13</sup>C NMR of 5-(bromo(phenyl)methyl)dihydrofuran-2(3H)-one (2aa)

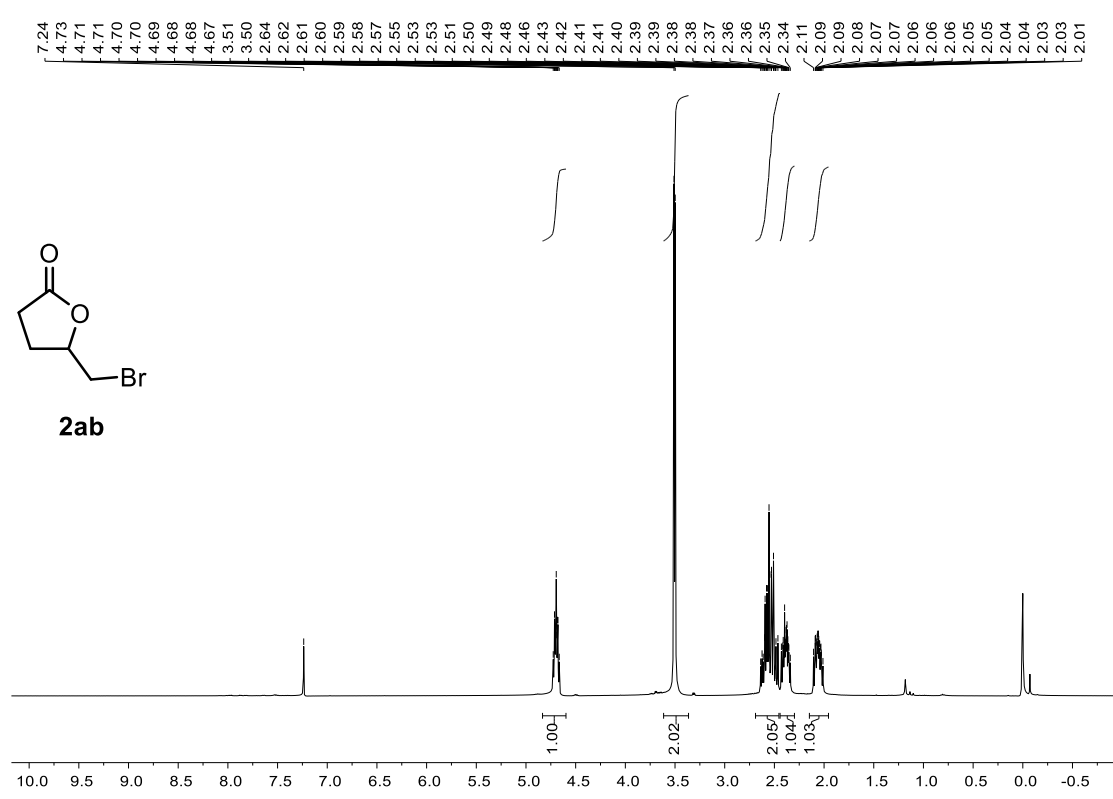

Figure S94. <sup>1</sup>H NMR of 5-(bromomethyl)dihydrofuran-2(3H)-one (2ab)



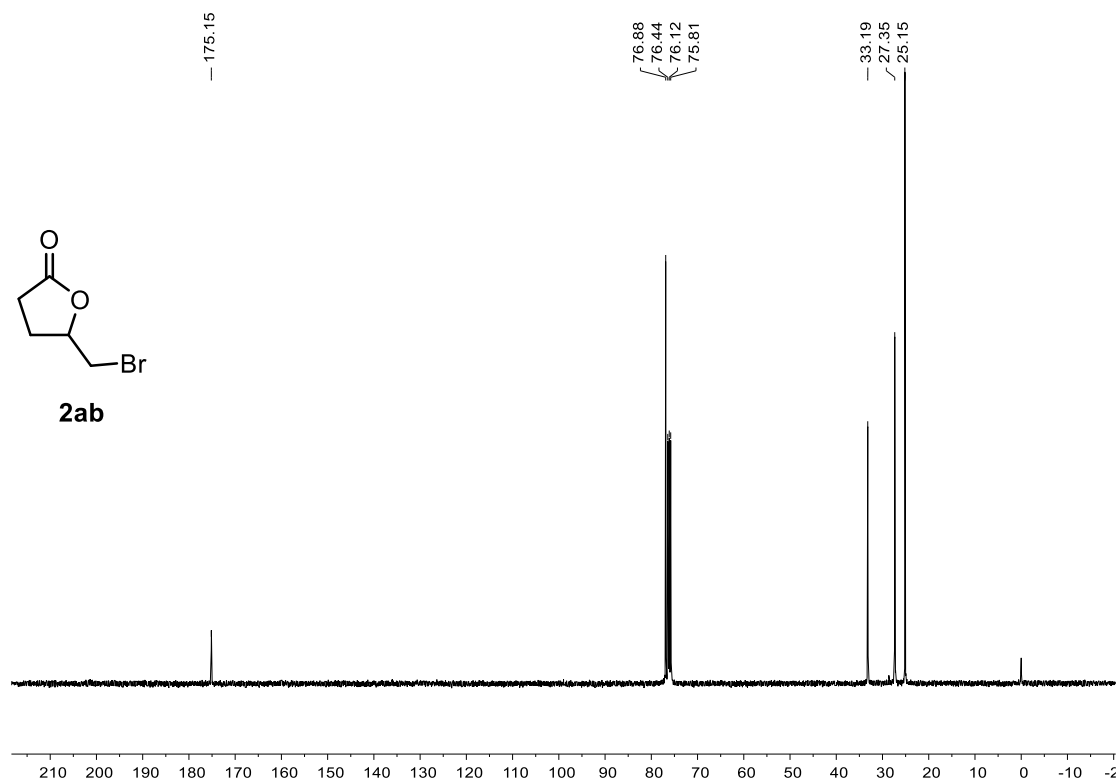

Figure S95.  $^{13}\text{C}$  NMR of 5-(bromomethyl)dihydrofuran-2(3H)-one (**2ab**)

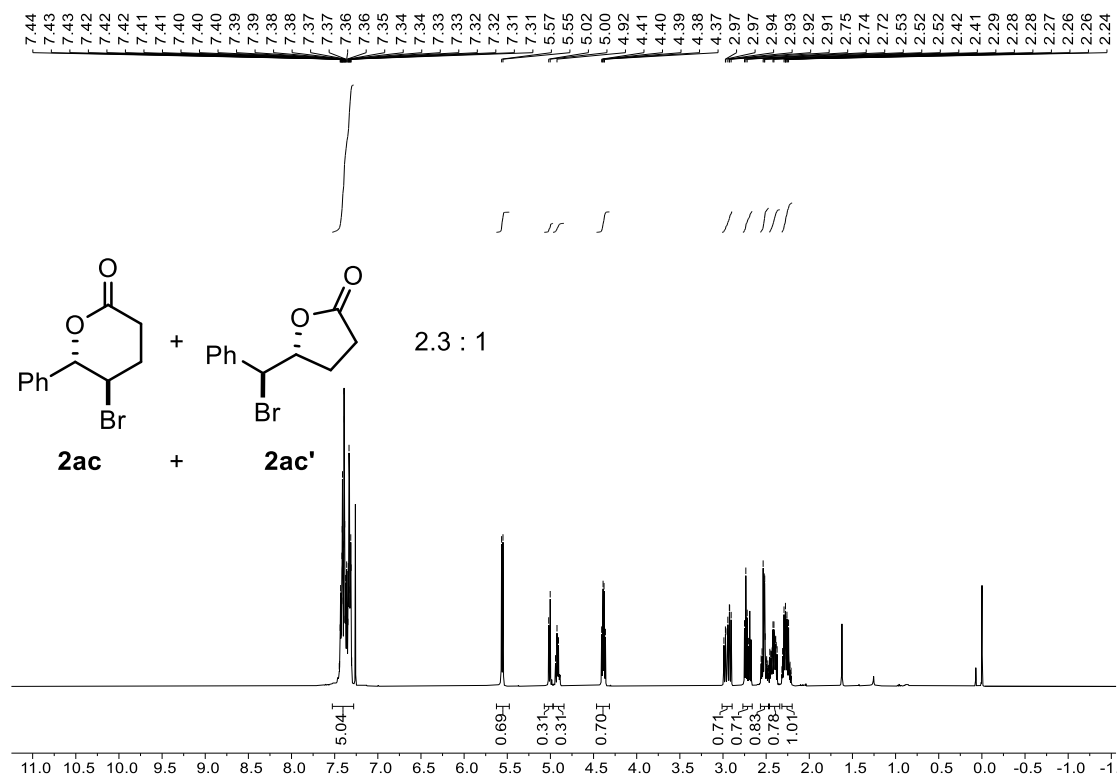

Figure S96.  $^1\text{H}$  NMR of 5-bromo-6-phenyltetrahydro-2H-pyran-2-one (major) (**2ac**) and 5-(bromo(phenyl)methyl)dihydrofuran-2(3H)-one (minor) (**2ac'**)

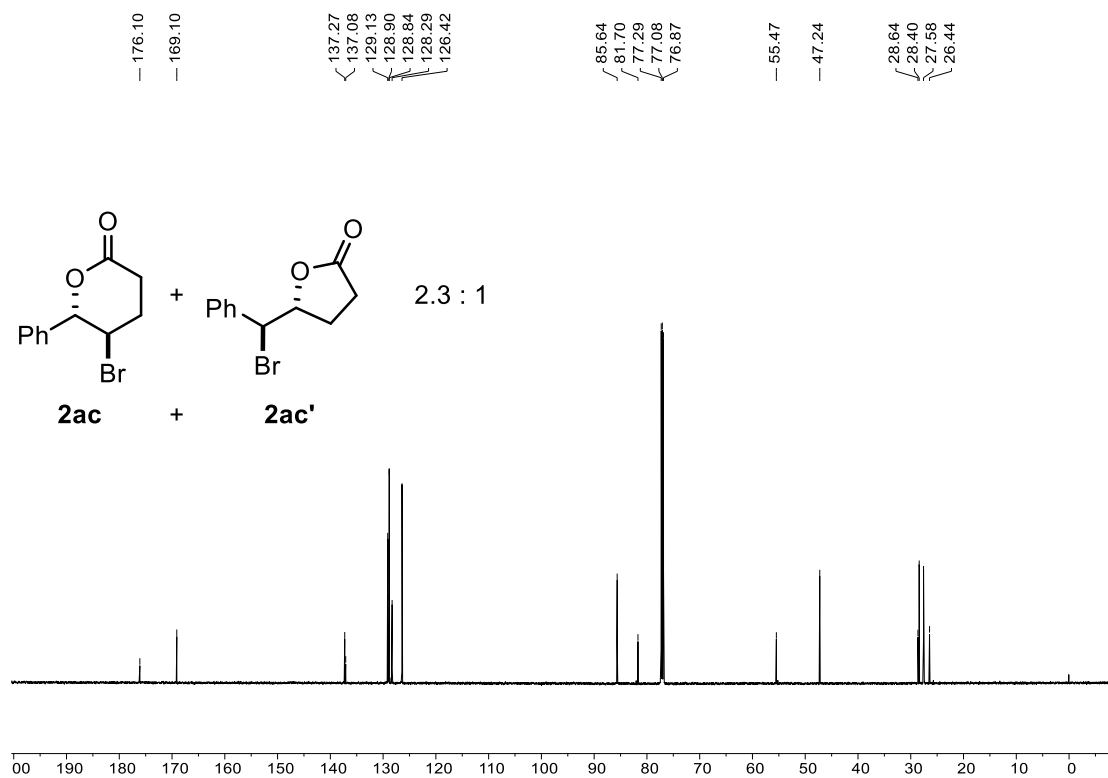

**Figure S97.**  $^{13}\text{C}$  NMR of 5-bromo-6-phenyltetrahydro-2*H*-pyran-2-one (major) (**2ac**) and 5-(bromo(phenyl)methyl)dihydrofuran-2(3*H*)-one (minor) (**2ac'**)

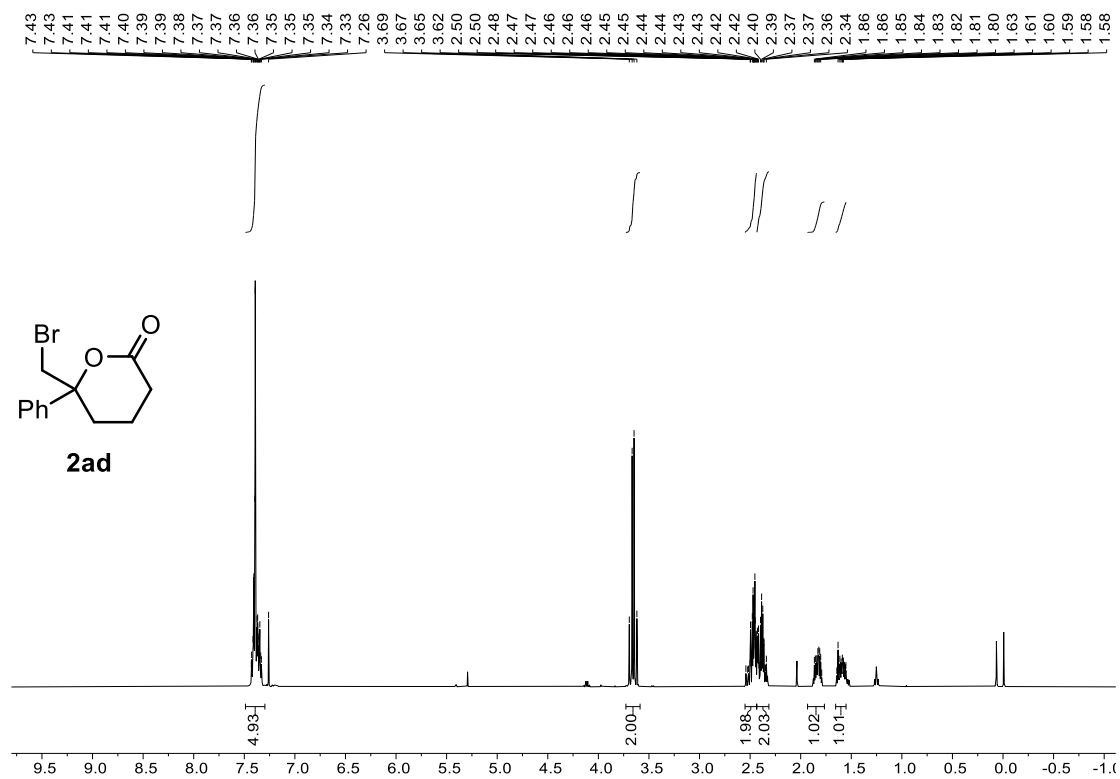

**Figure S98.**  $^1\text{H}$  NMR of 6-(bromomethyl)-6-(4-bromophenyl)tetrahydro-2*H*-pyran-2-one (**2ad**)

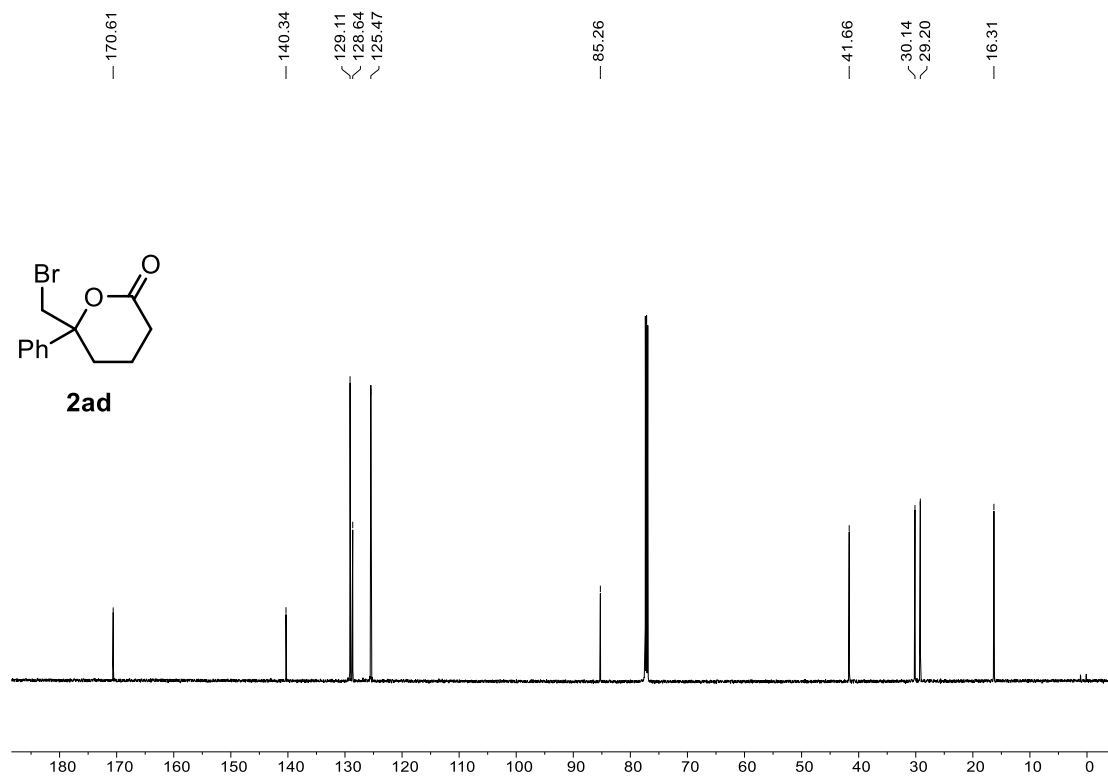

Figure S99.  $^{13}\text{C}$  NMR of 6-(bromomethyl)-6-(4-bromophenyl)tetrahydro-2H-pyran-2-one (**2ad**)

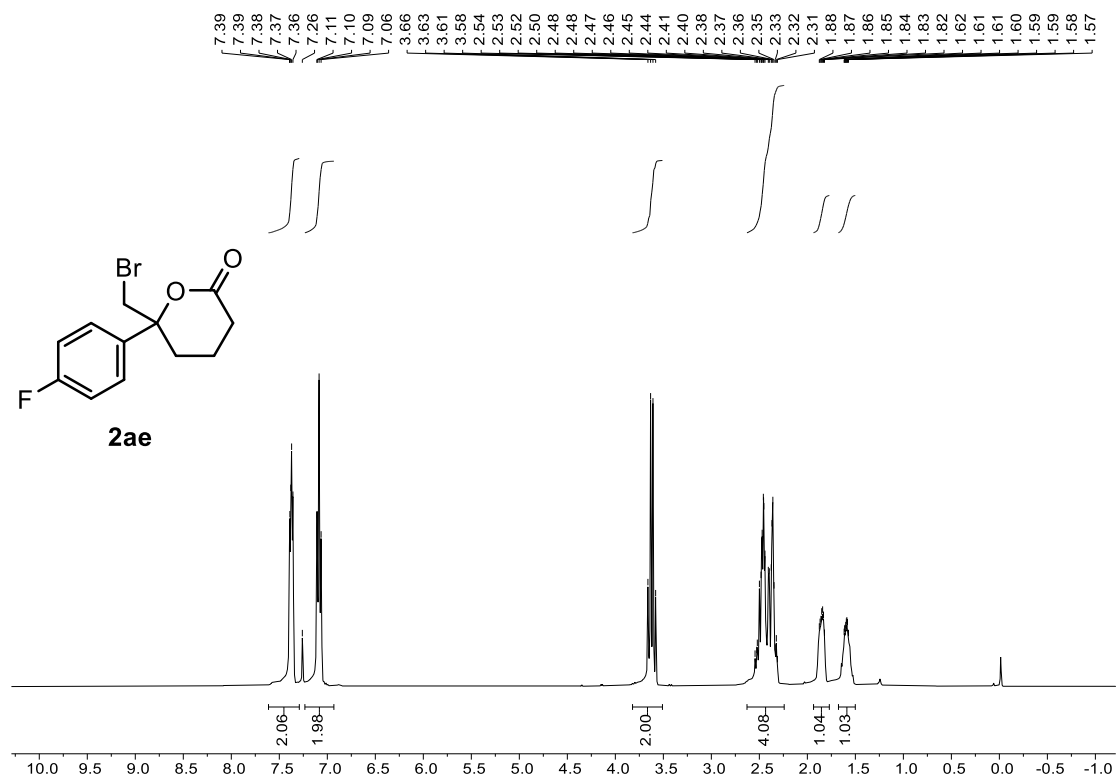

Figure S100.  $^1\text{H}$  NMR of 6-(bromomethyl)-6-(4-fluorophenyl)tetrahydro-2H-pyran-2-one (**2ae**)

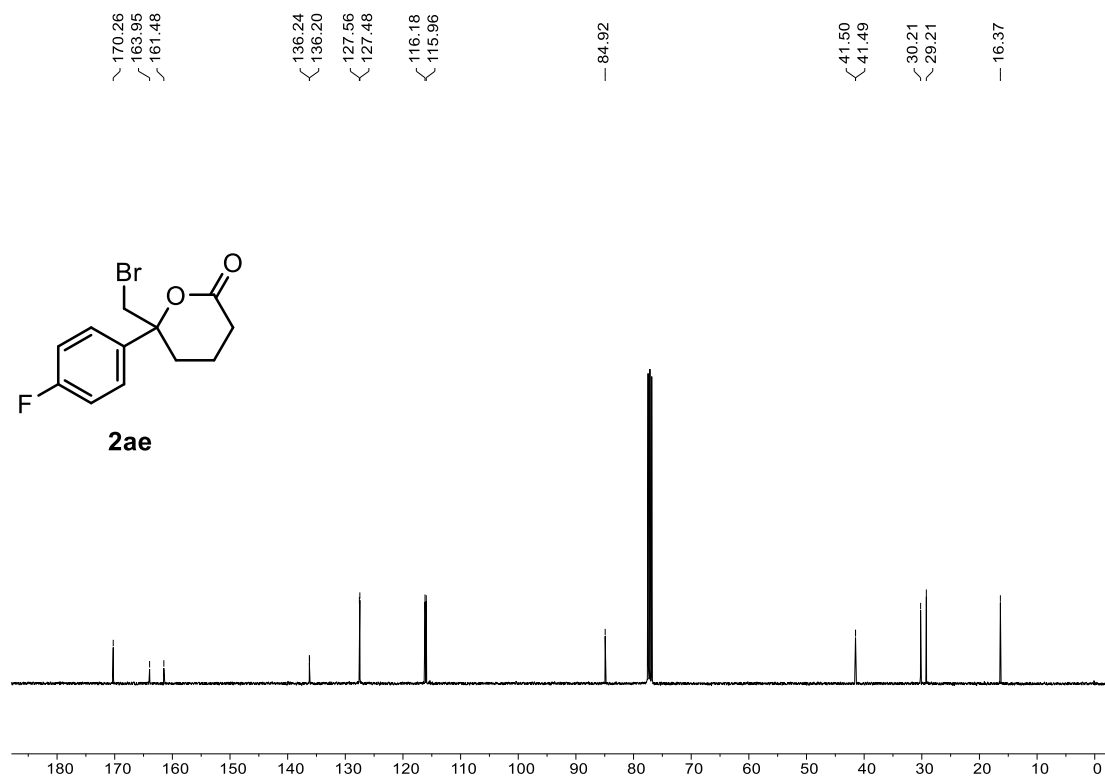

**Figure S101.**  $^{13}\text{C}$  NMR of 6-(bromomethyl)-6-(4-fluorophenyl)tetrahydro-2H-pyran-2-one (**2ae**)

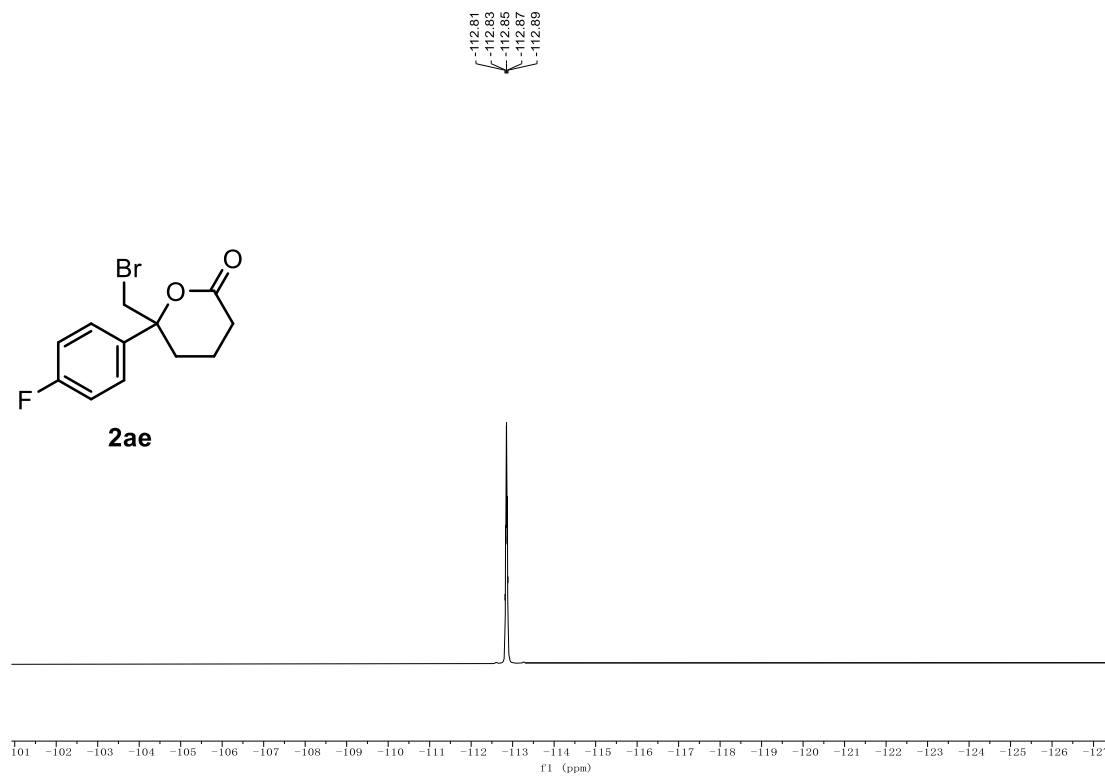

**Figure S102.**  $^{19}\text{F}$  NMR of 6-(bromomethyl)-6-(4-fluorophenyl)tetrahydro-2H-pyran-2-one (**2ae**)

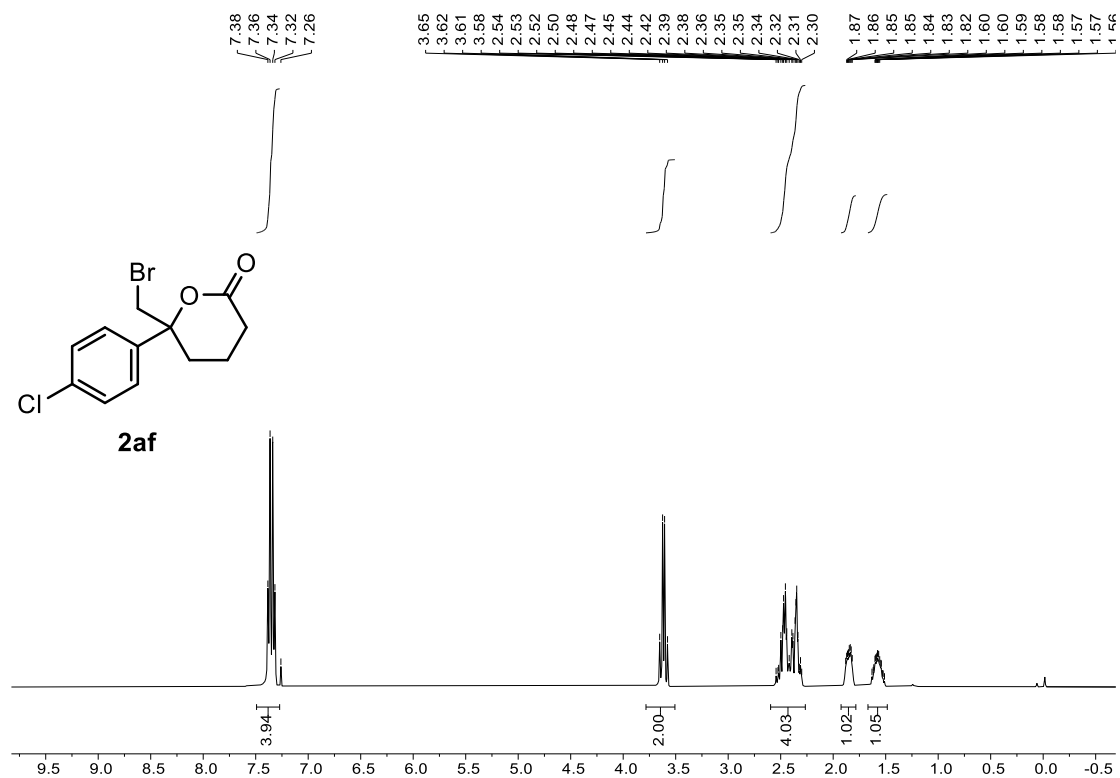

**Figure S103.** <sup>1</sup>H NMR of 6-(bromomethyl)-6-(4-chlorophenyl)tetrahydro-2H-pyran-2-one (**2af**)

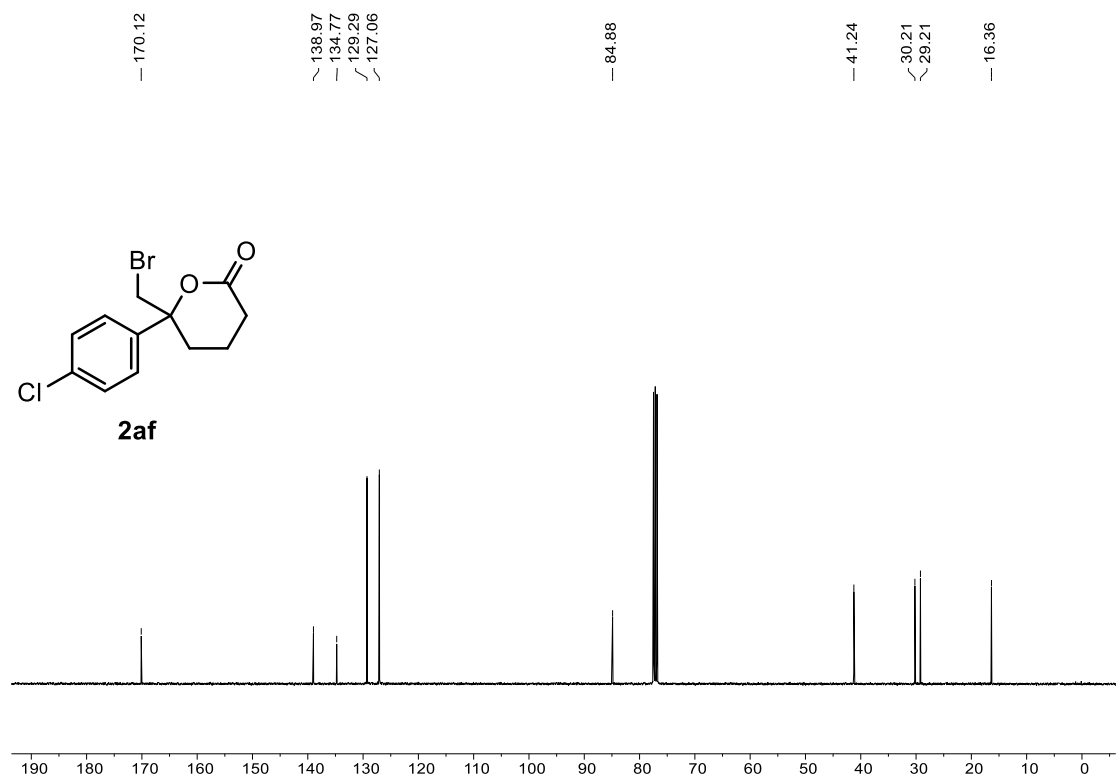

**Figure S104.** <sup>13</sup>C NMR of 6-(bromomethyl)-6-(4-chlorophenyl)tetrahydro-2H-pyran-2-one (**2af**)

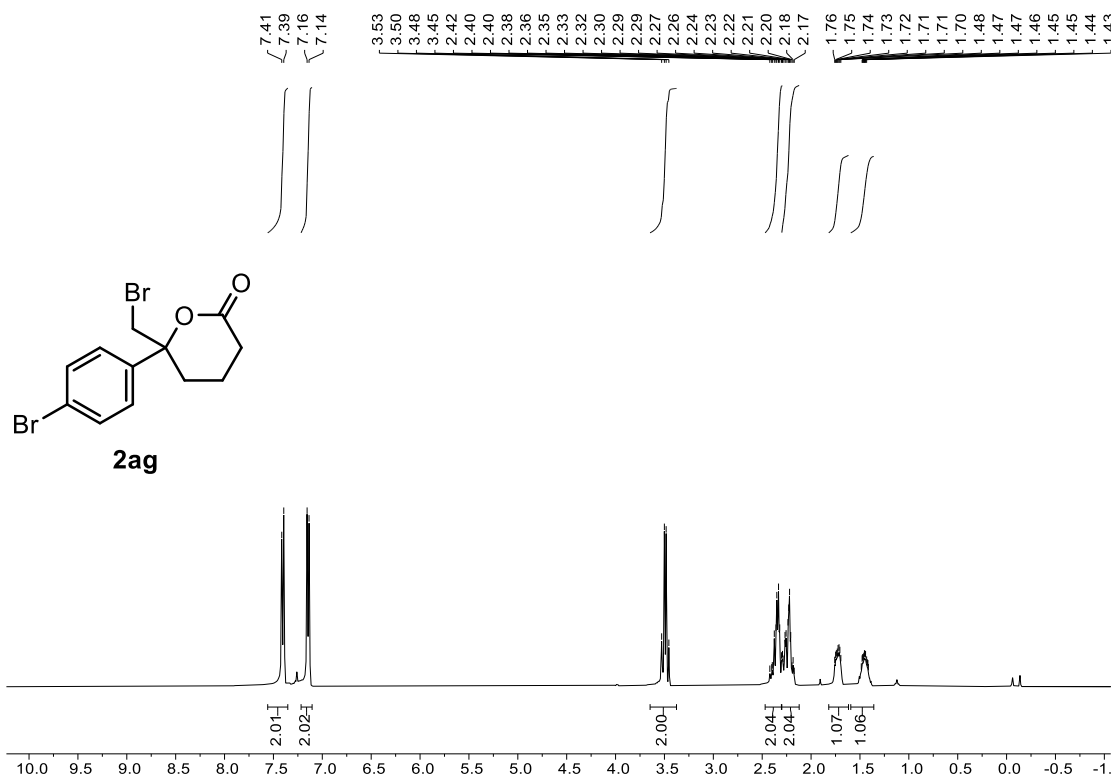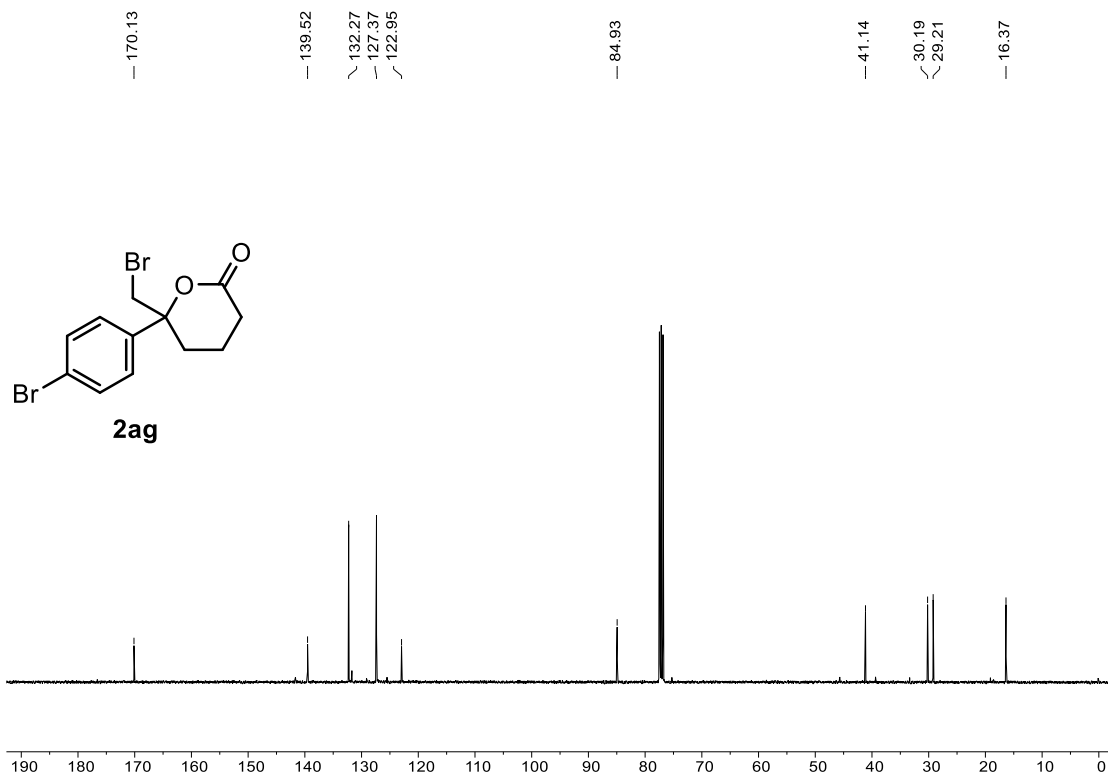

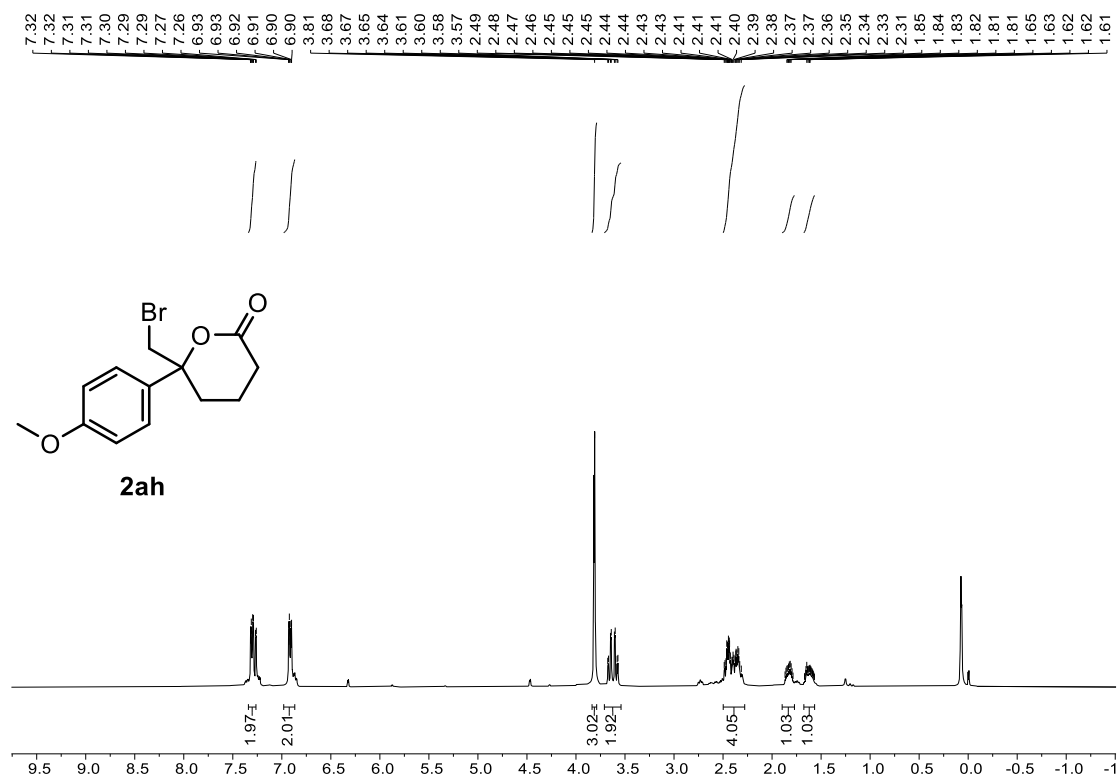

**Figure S107.**  $^1\text{H}$  NMR of 6-(bromomethyl)-6-(4-methoxyphenyl)tetrahydro-2H-pyran-2-one (**2ah**)

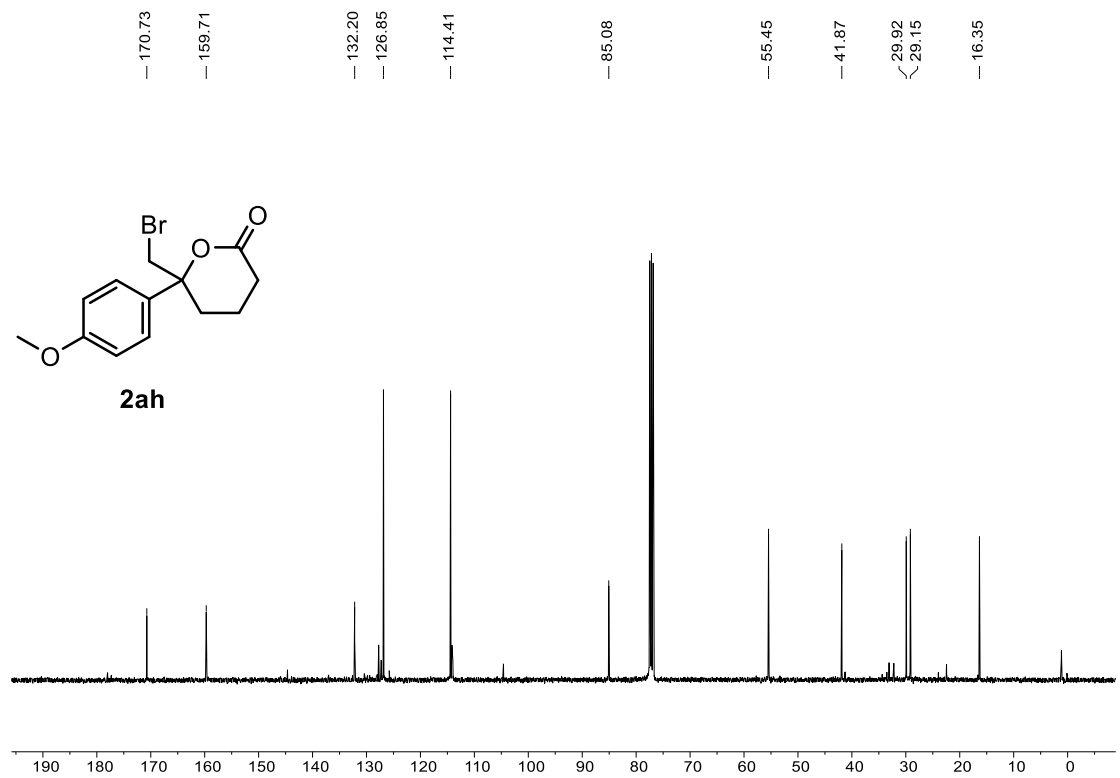

**Figure S108.**  $^{13}\text{C}$  NMR of 6-(bromomethyl)-6-(4-methoxyphenyl)tetrahydro-2H-pyran-2-one (**2ah**)

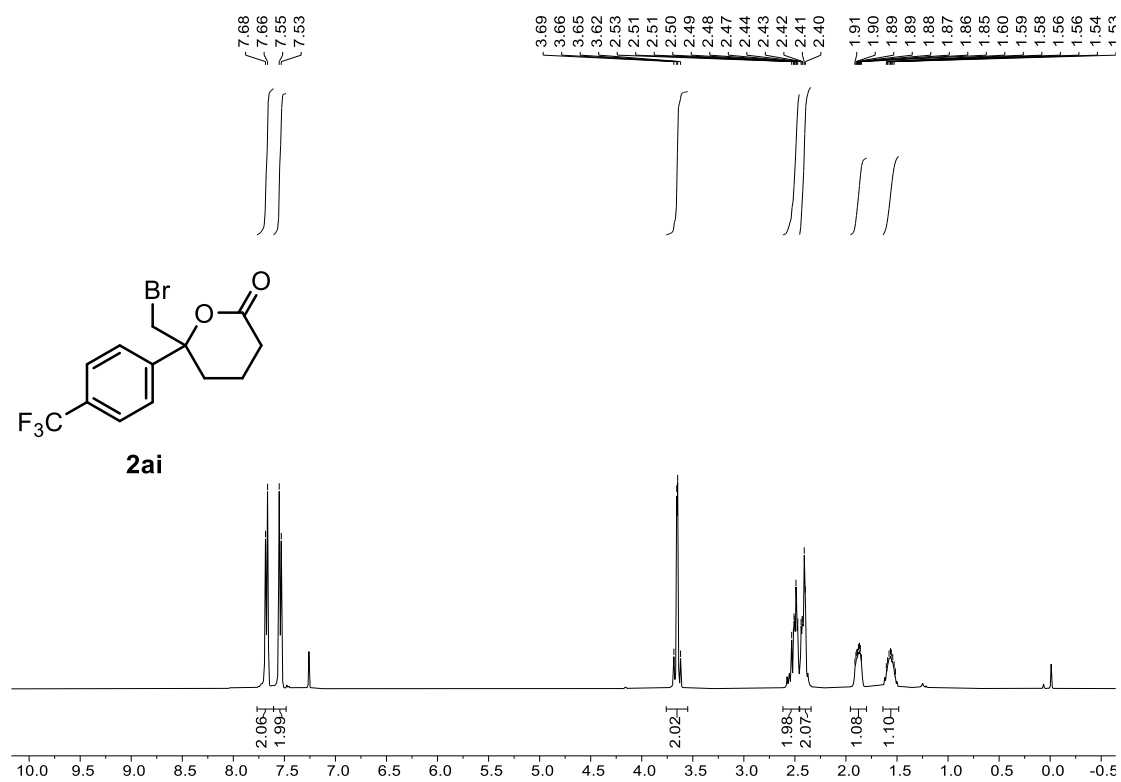

Figure S109. <sup>1</sup>H NMR of 6-(bromomethyl)-6-(4-(trifluoromethyl)phenyl)tetrahydro-2*H*-pyran-2-one (**2ai**)

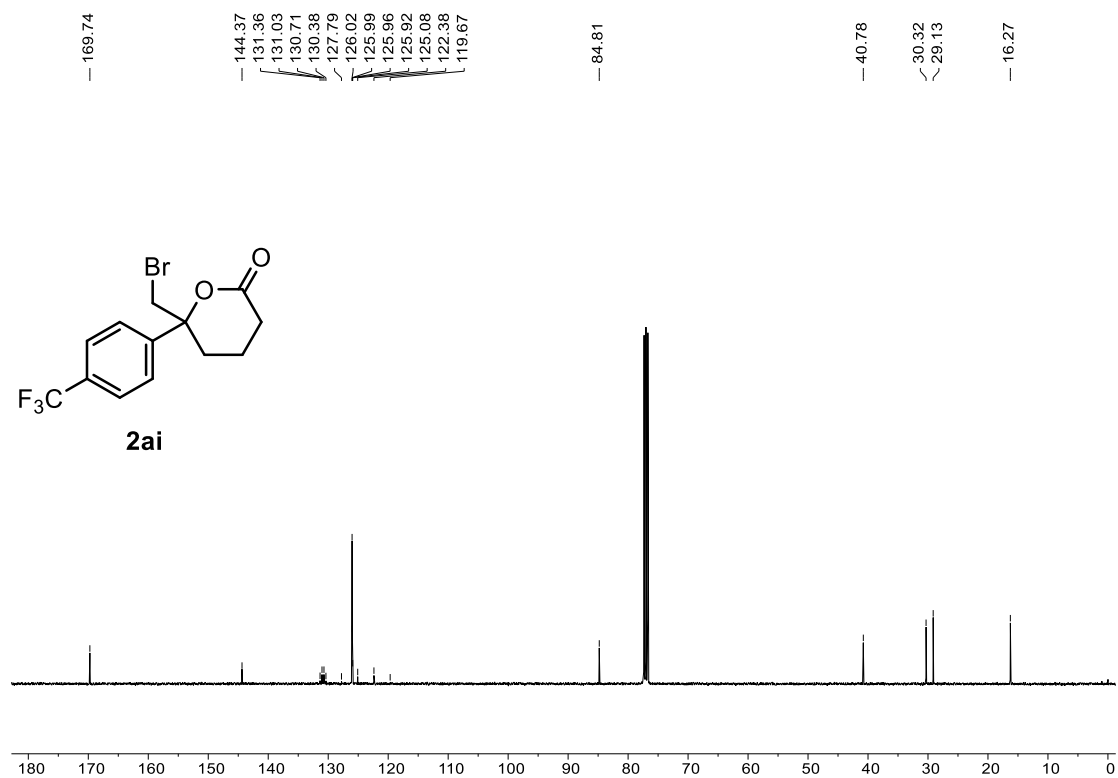

Figure S110. <sup>13</sup>C NMR of 6-(bromomethyl)-6-(4-(trifluoromethyl)phenyl)tetrahydro-2*H*-pyran-2-one (**2ai**)



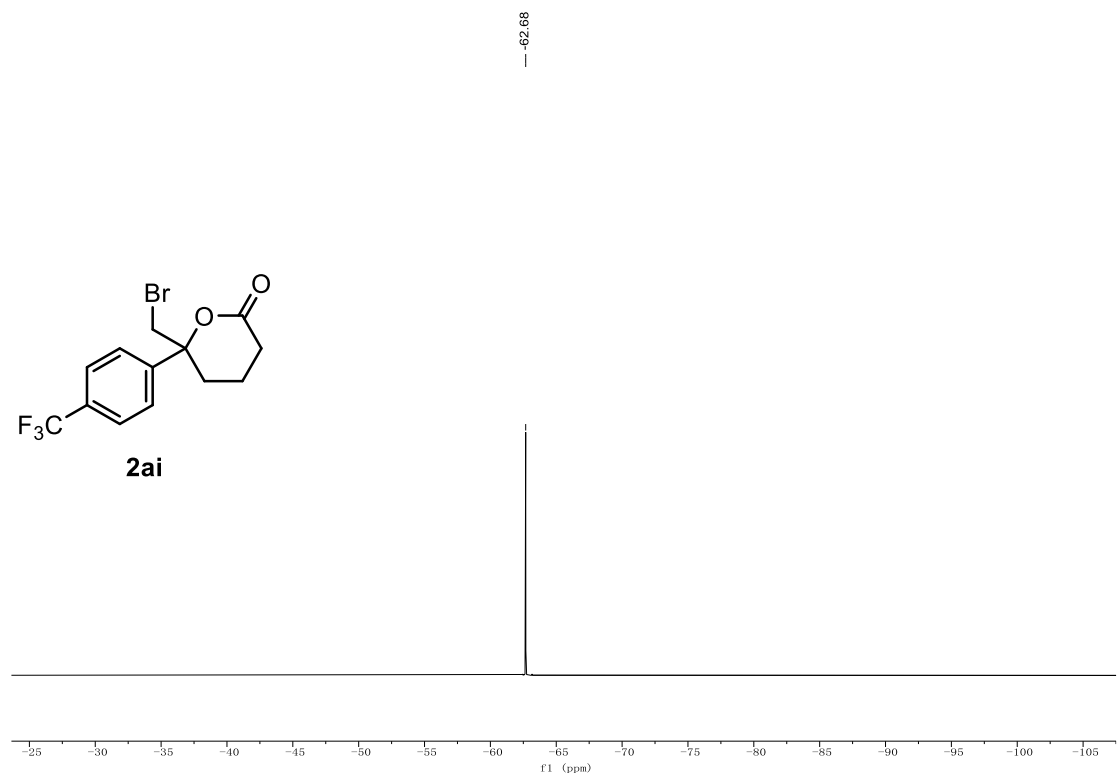

Figure S111. <sup>19</sup>F NMR of 6-(bromomethyl)-6-(4-(trifluoromethyl)phenyl)tetrahydro-2H-pyran-2-one (2ai)

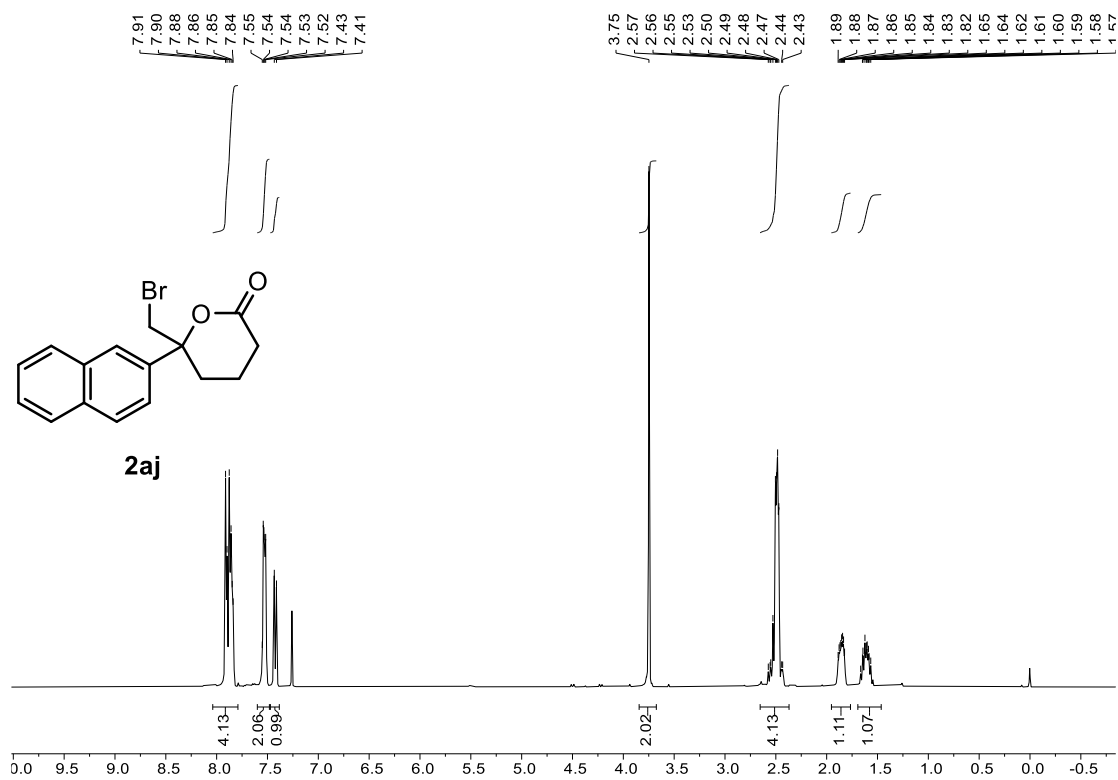

Figure S112. <sup>1</sup>H NMR of 6-(bromomethyl)-6-(naphthalen-2-yl)tetrahydro-2H-pyran-2-one (2aj)

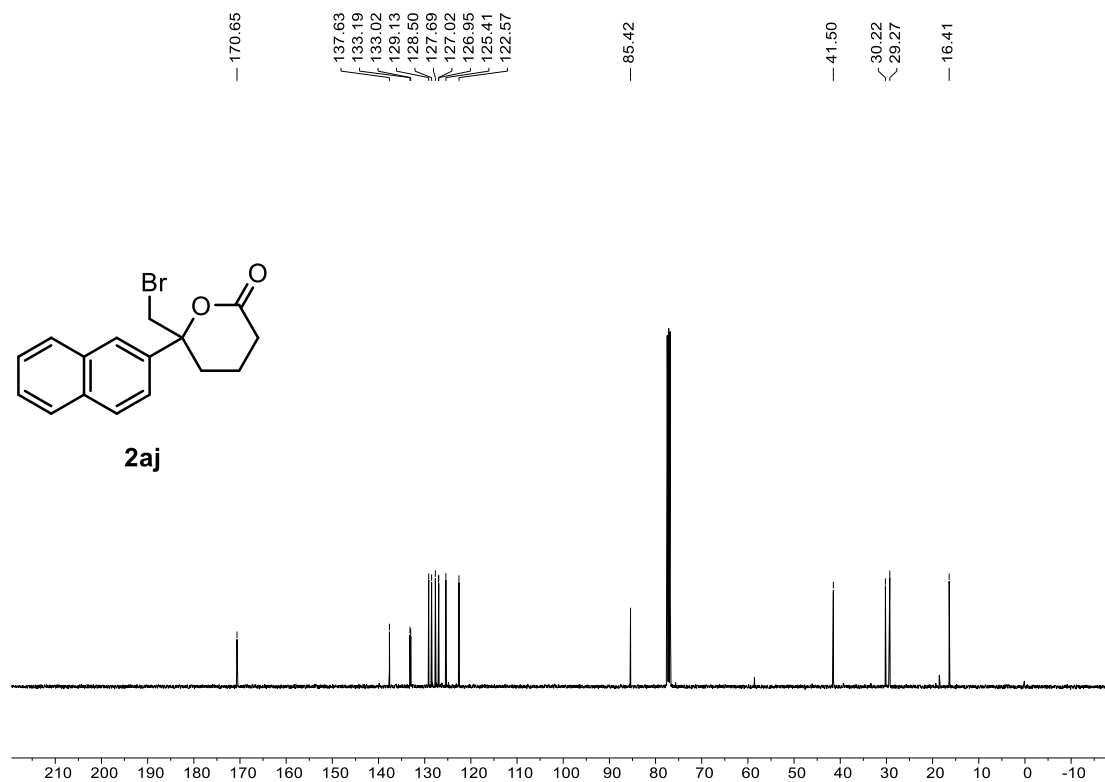

Figure S113. <sup>13</sup>C NMR of 6-(bromomethyl)-6-(naphthalen-2-yl)tetrahydro-2H-pyran-2-one (**2aj**)

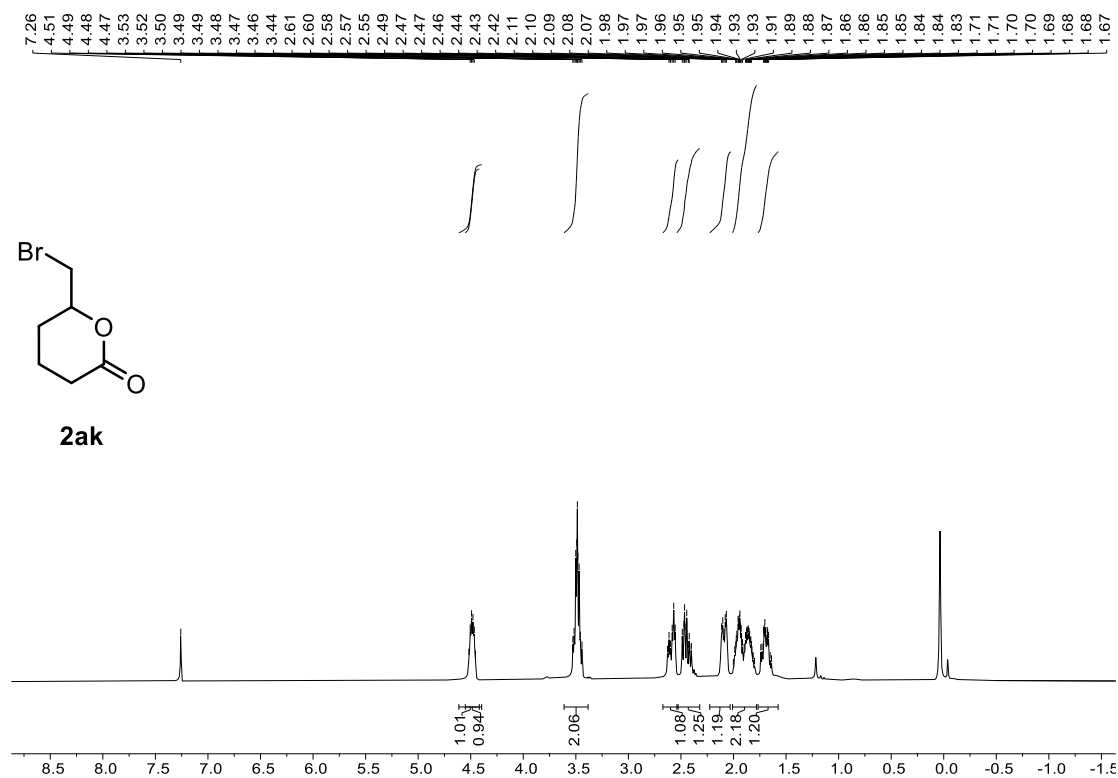

Figure S114. <sup>1</sup>H NMR of 6-(bromomethyl)tetrahydro-2H-pyran-2-one (**2ak**)

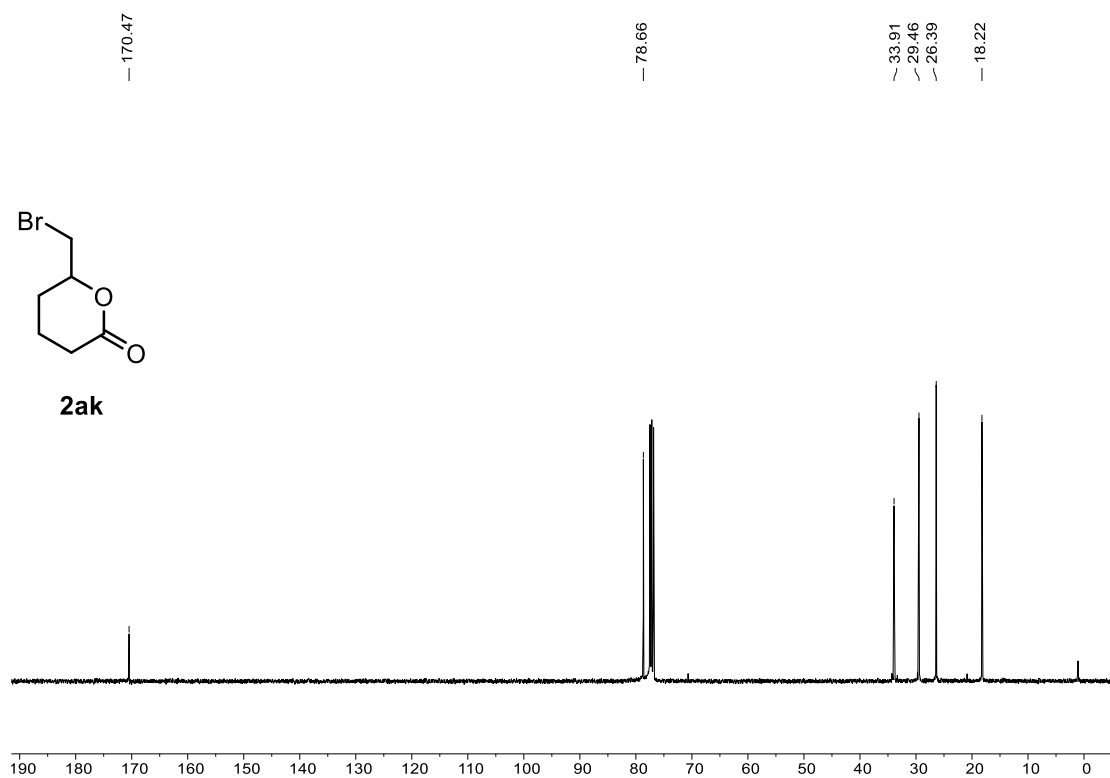

Figure S115. <sup>13</sup>C NMR of 6-(bromomethyl)tetrahydro-2H-pyran-2-one (**2ak**)

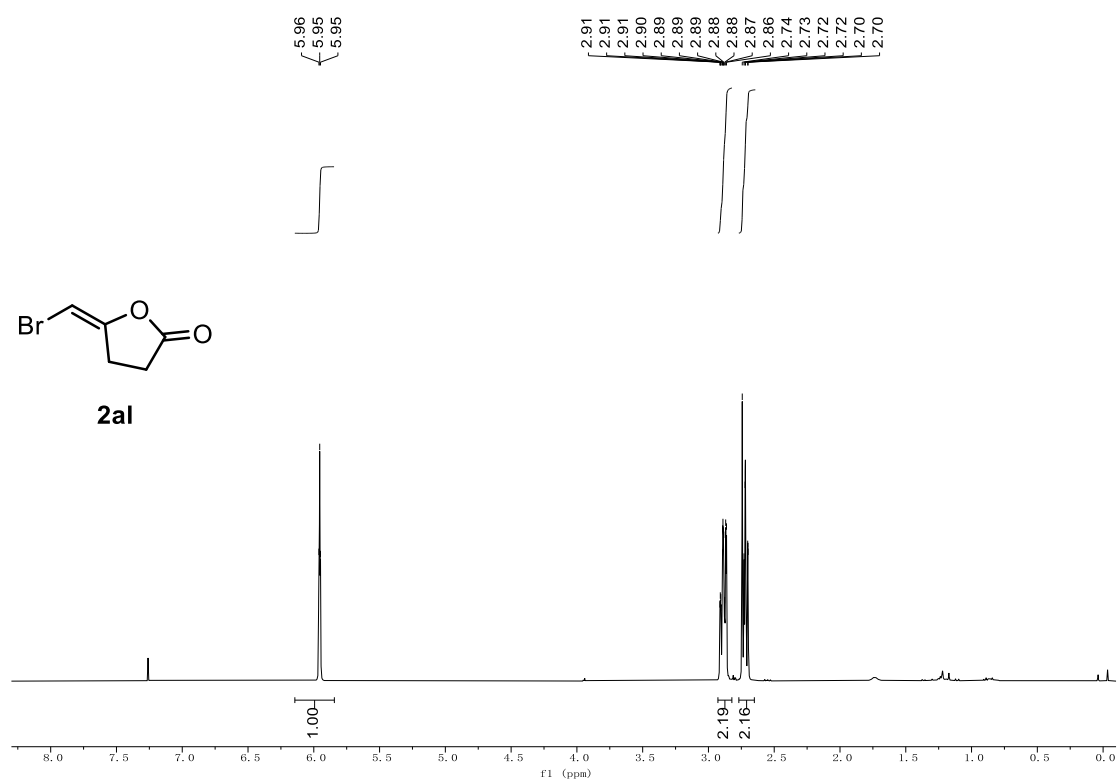

Figure S116. <sup>1</sup>H NMR of (*E*)-5-(Bromomethylene)dihydrofuran-2(3*H*)-one (**2al**)

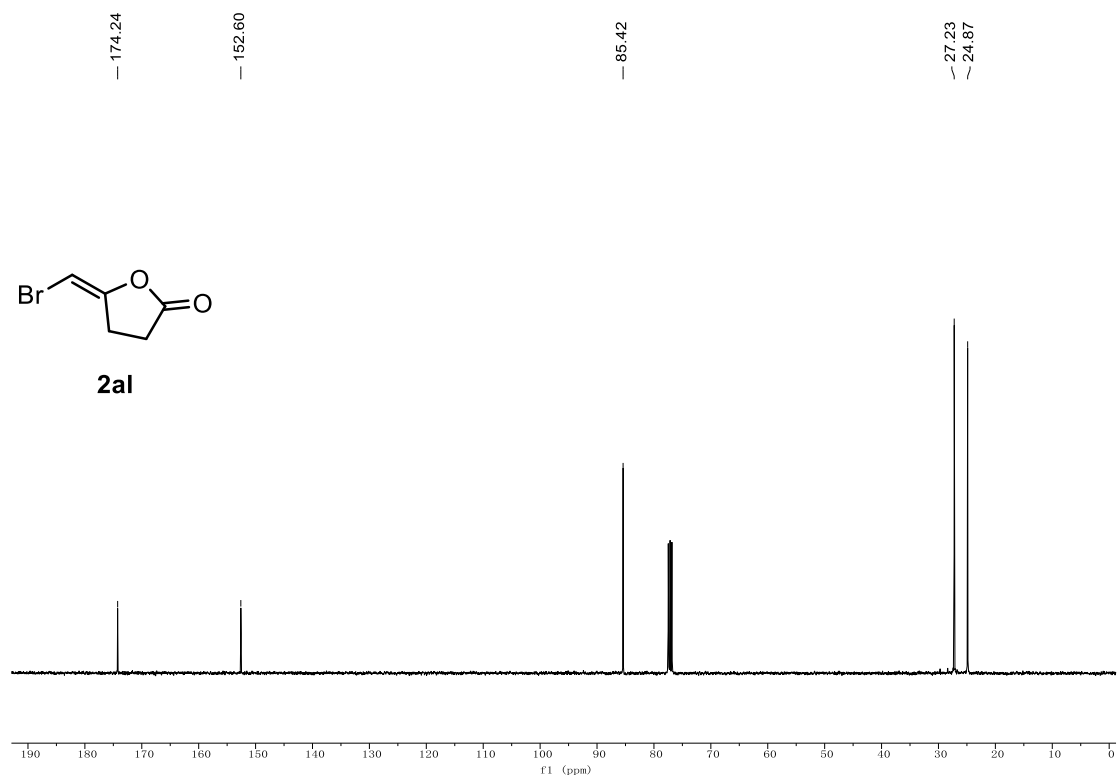

**Figure S117.**  $^{13}\text{C}$  NMR of (*E*)-5-(Bromomethylene)dihydrofuran-2(3*H*)-one (**2a1**)

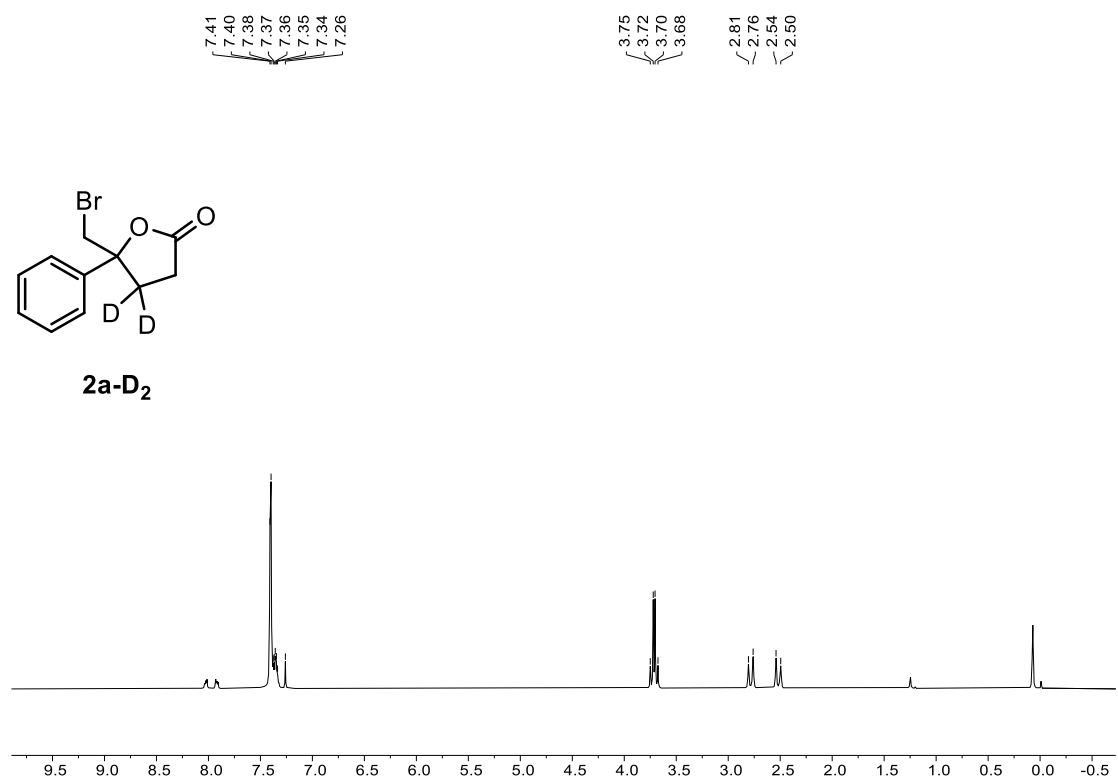

**Figure S118.**  $^1\text{H}$  NMR of 5-(bromomethyl)-5-phenyldihydrofuran-2(3*H*)-one-4,4-*d*<sub>2</sub> (**2a-D<sub>2</sub>**)

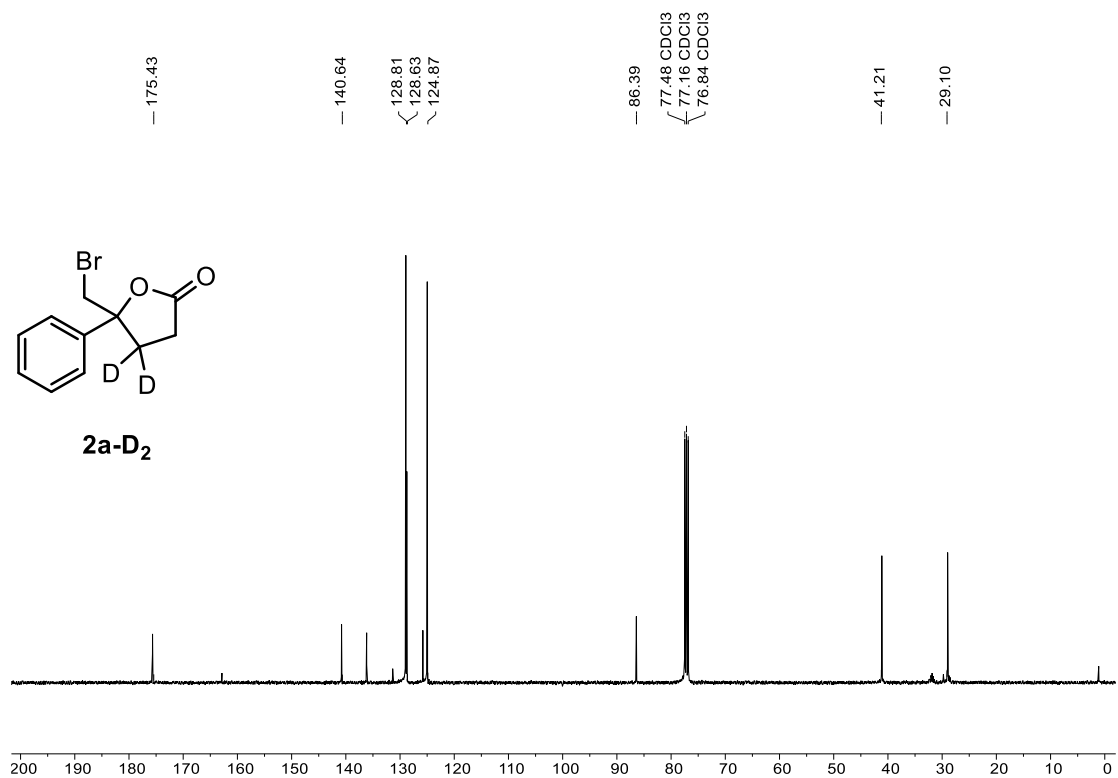

**Figure S119.** <sup>13</sup>C NMR of 5-(bromomethyl)-5-phenyldihydrofuran-2(3H)-one-4,4-d<sub>2</sub> (**2a-D<sub>2</sub>**)

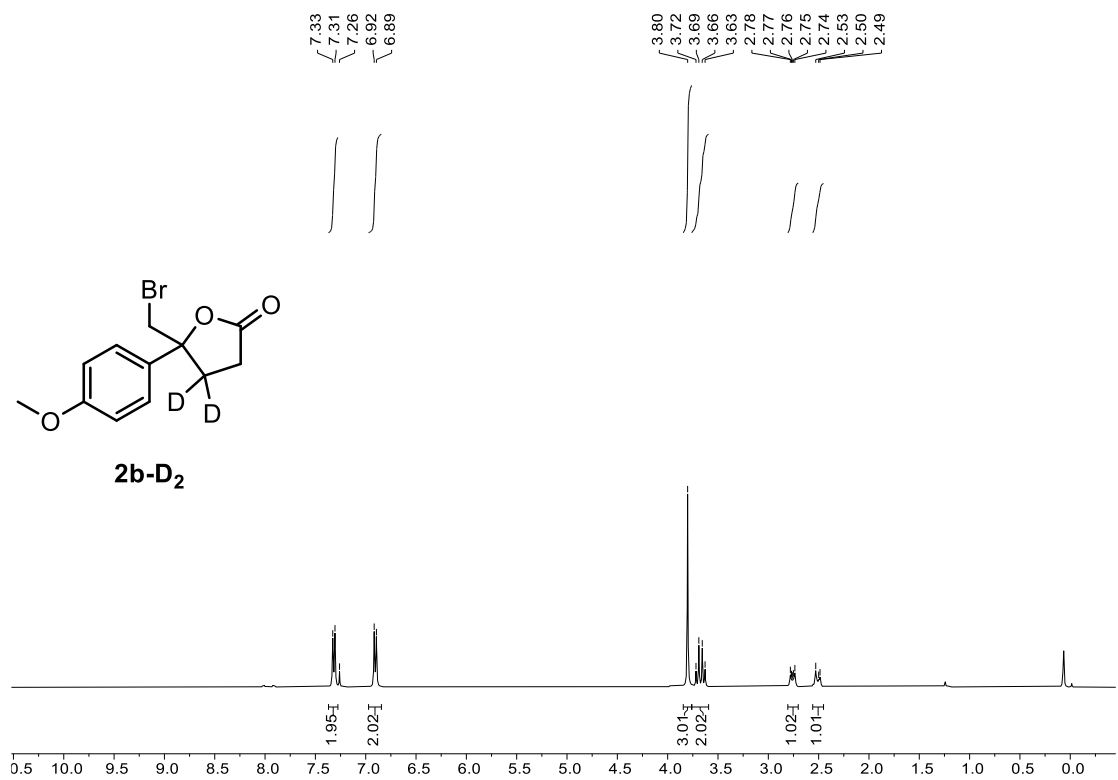

**Figure S120.** <sup>1</sup>H NMR of 5-(bromomethyl)-5-(4-methoxyphenyl)dihydrofuran-2(3H)-one-4,4-d<sub>2</sub> (**2b-D<sub>2</sub>**)

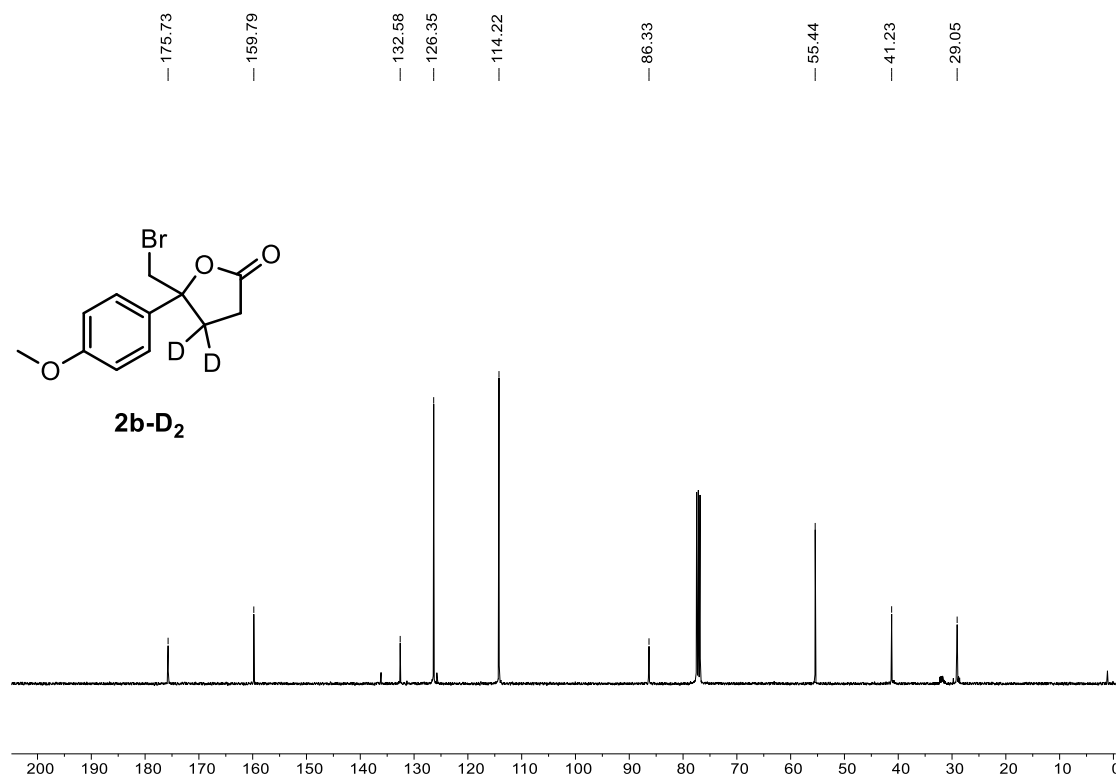

**Figure S121.** <sup>13</sup>C NMR of 5-(bromomethyl)-5-(4-methoxyphenyl)dihydrofuran-2(3*H*)-one-4,4-*d*<sub>2</sub> (**2b-D<sub>2</sub>**)

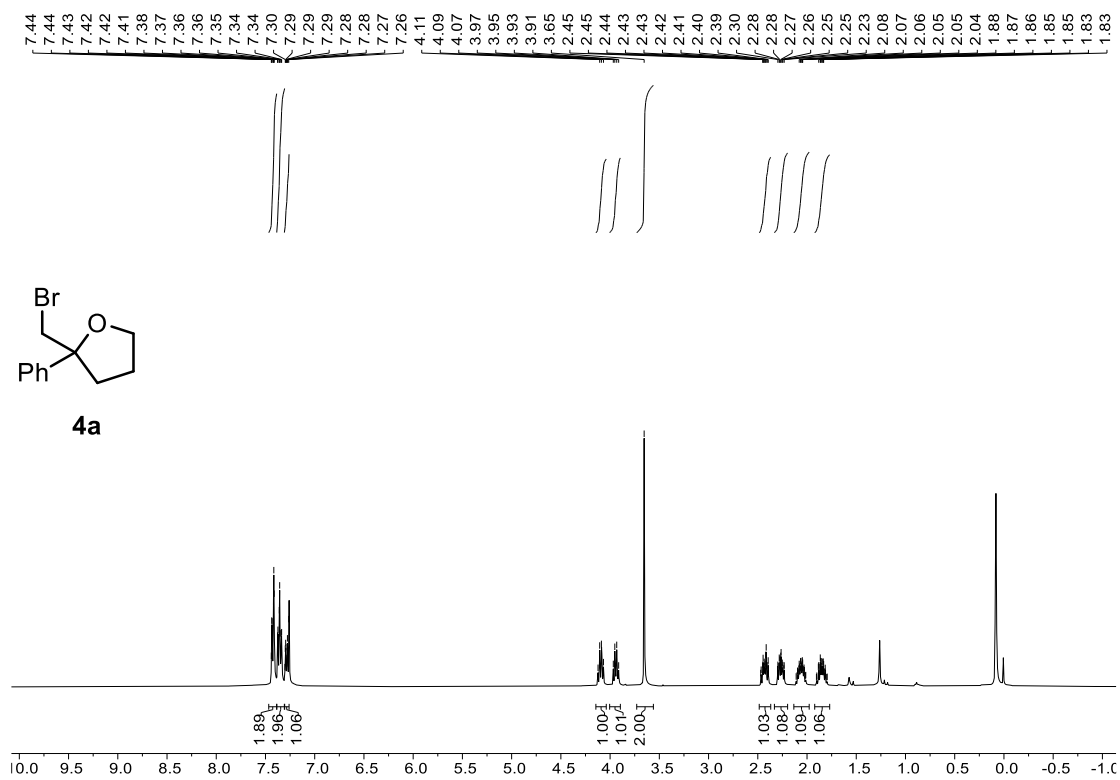

**Figure S122.** <sup>1</sup>H NMR of 2-(bromomethyl)-2-phenyltetrahydrofuran (**4a**)

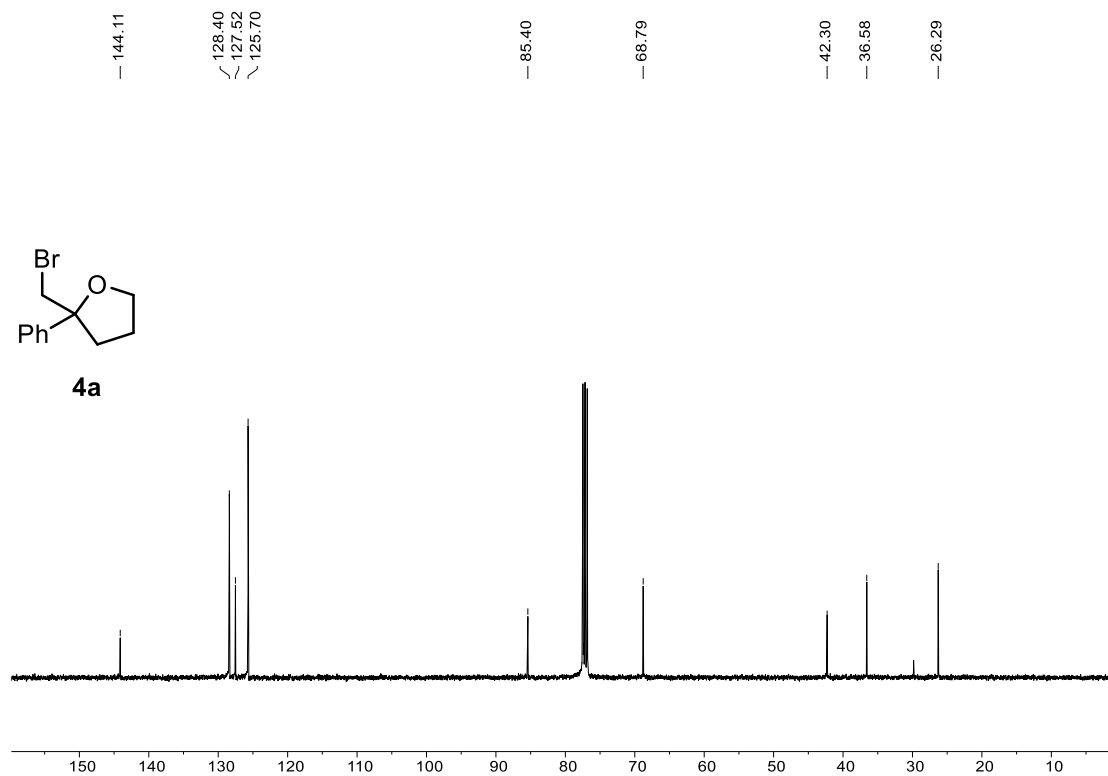

Figure S123.  $^{13}\text{C}$  NMR of 2-(bromomethyl)-2-phenyltetrahydrofuran (**4a**)

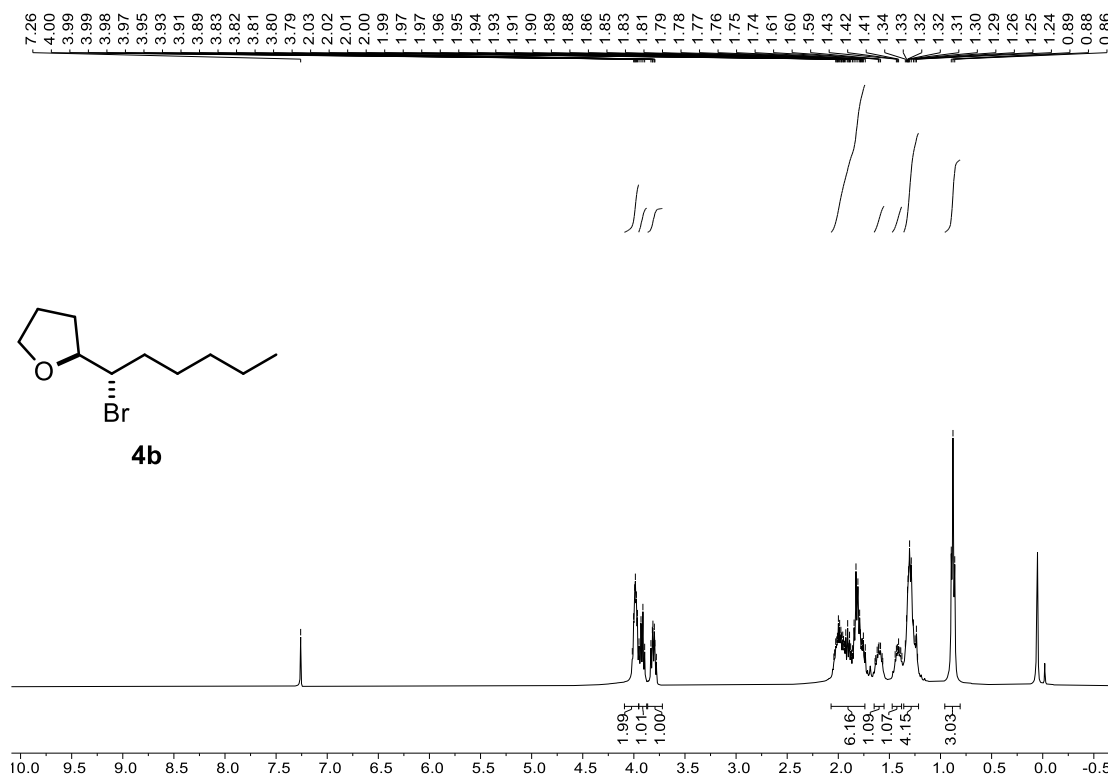

Figure S124.  $^1\text{H}$  NMR of 2-(1-bromohexyl)tetrahydrofuran (**4b**)

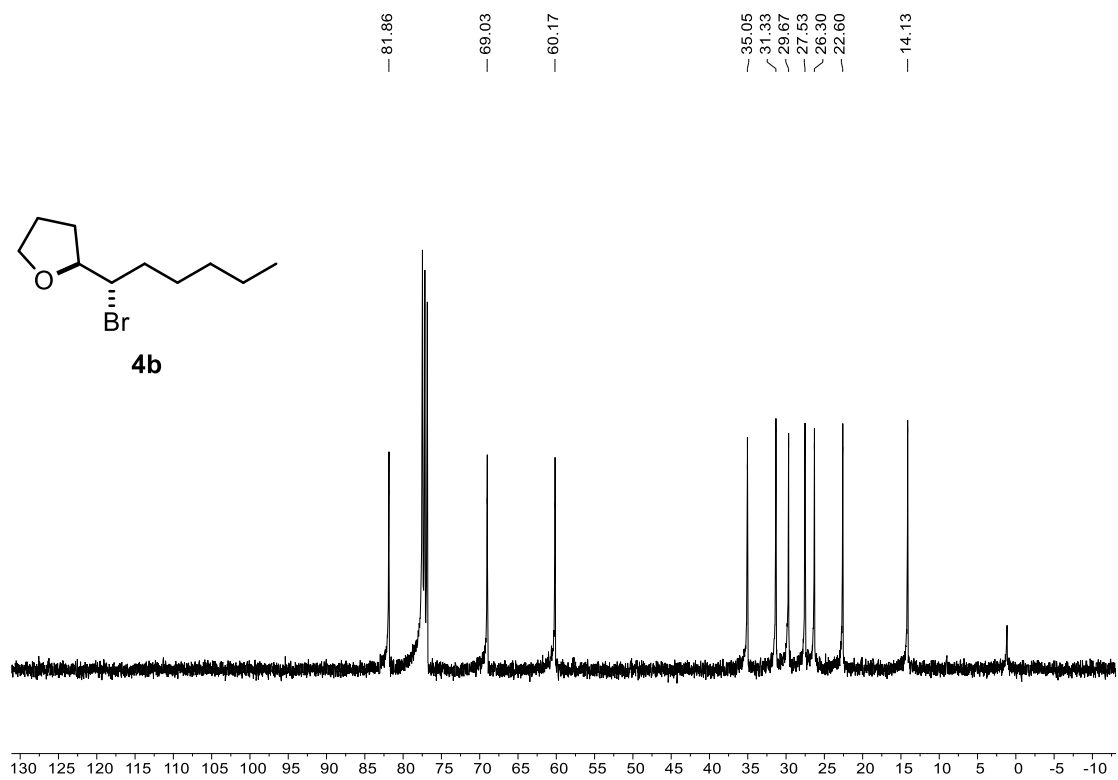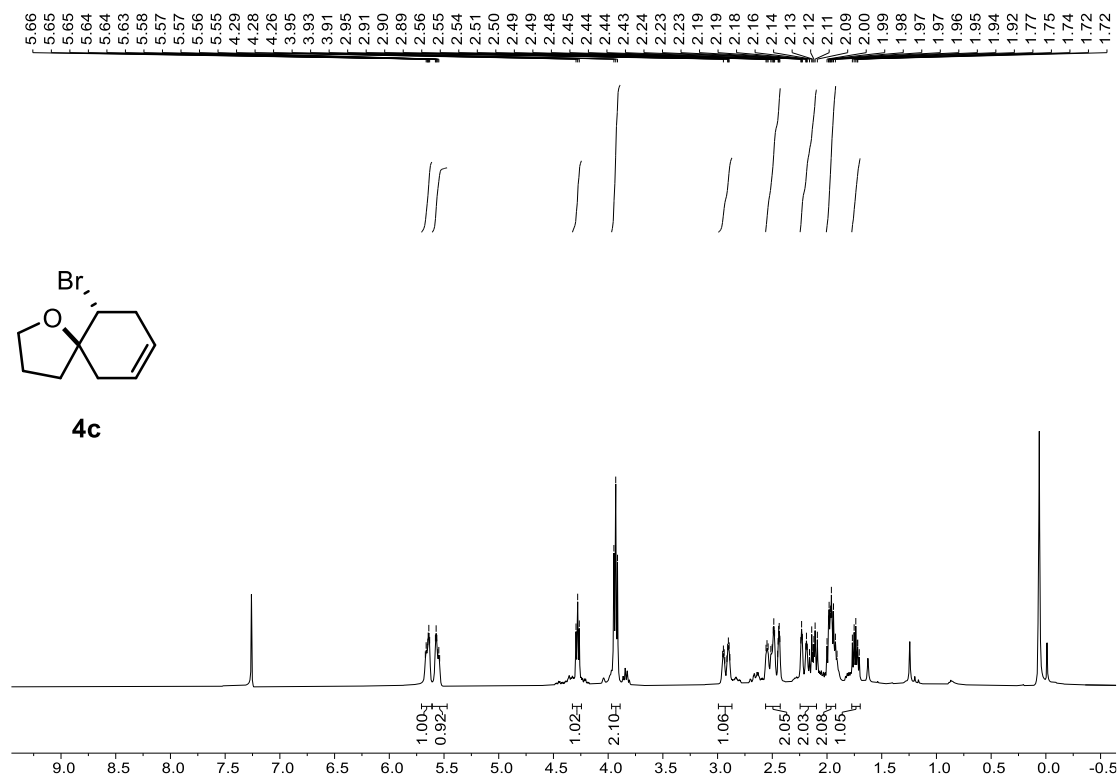



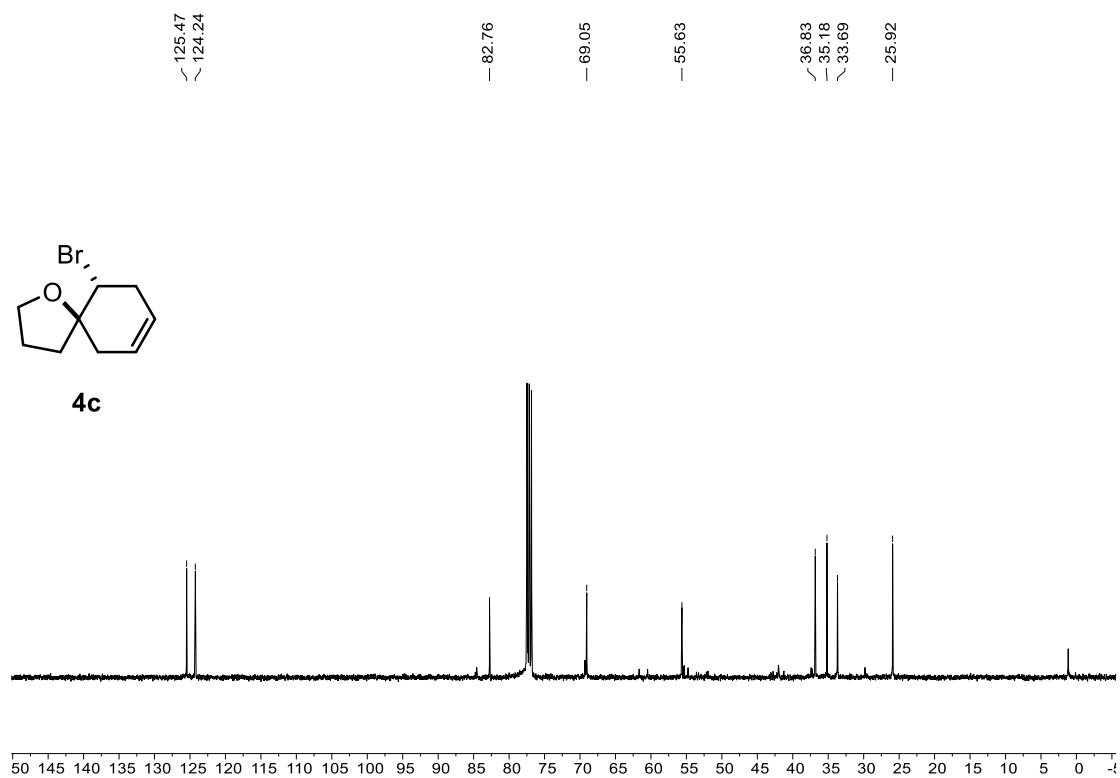

Figure S127. <sup>13</sup>C NMR of (±)-10-bromo-1-oxaspiro[4.5]dec-7-ene (**4c**)

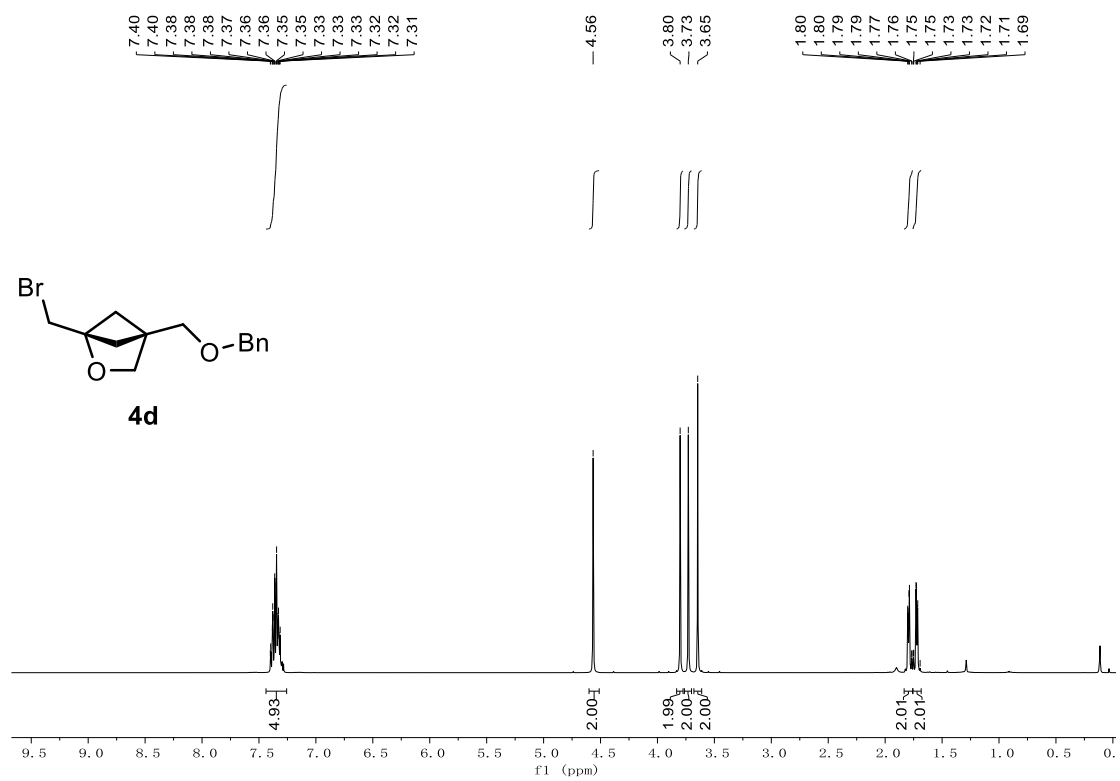

Figure S128. <sup>1</sup>H NMR of 4-((Benzyloxy)methyl)-1-(bromomethyl)-2-oxabicyclo[2.1.1]hexane (**4d**)

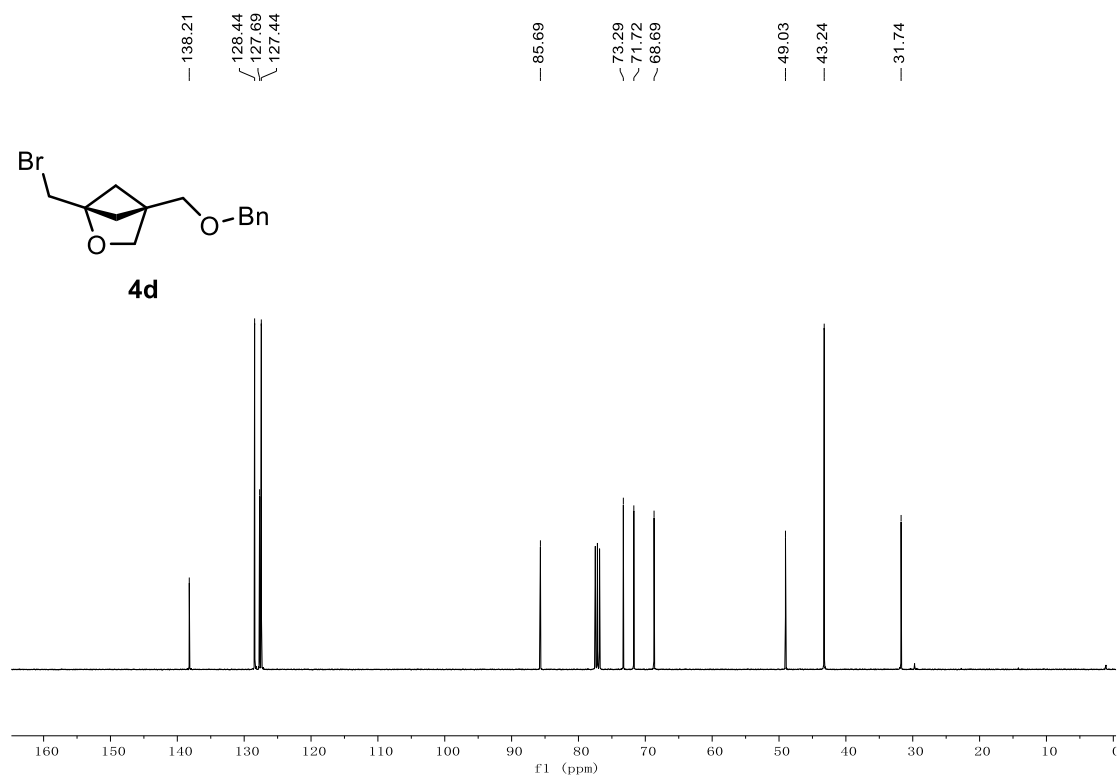

**Figure S129.**  $^{13}\text{C}$  NMR of 4-((Benzyloxy)methyl)-1-(bromomethyl)-2-oxabicyclo[2.1.1]hexane (**4d**)

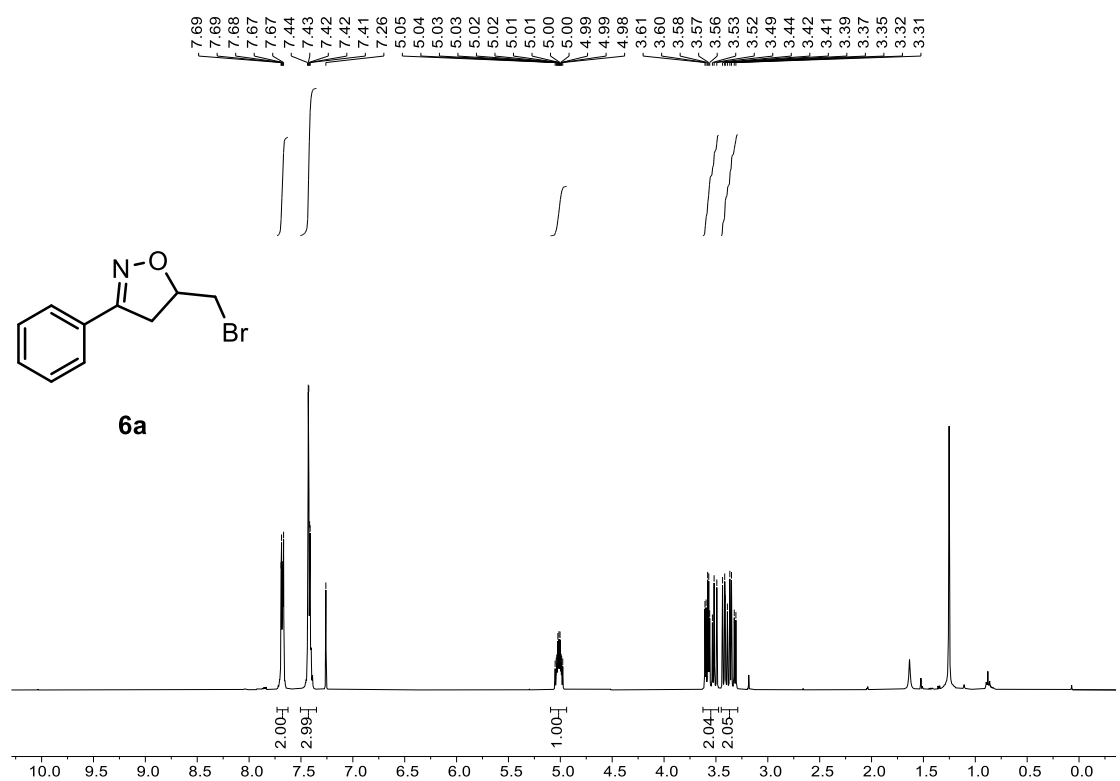

**Figure S130.**  $^1\text{H}$  NMR of 5-(bromomethyl)-3-phenyl-4,5-dihydroisoxazole (**6a**)

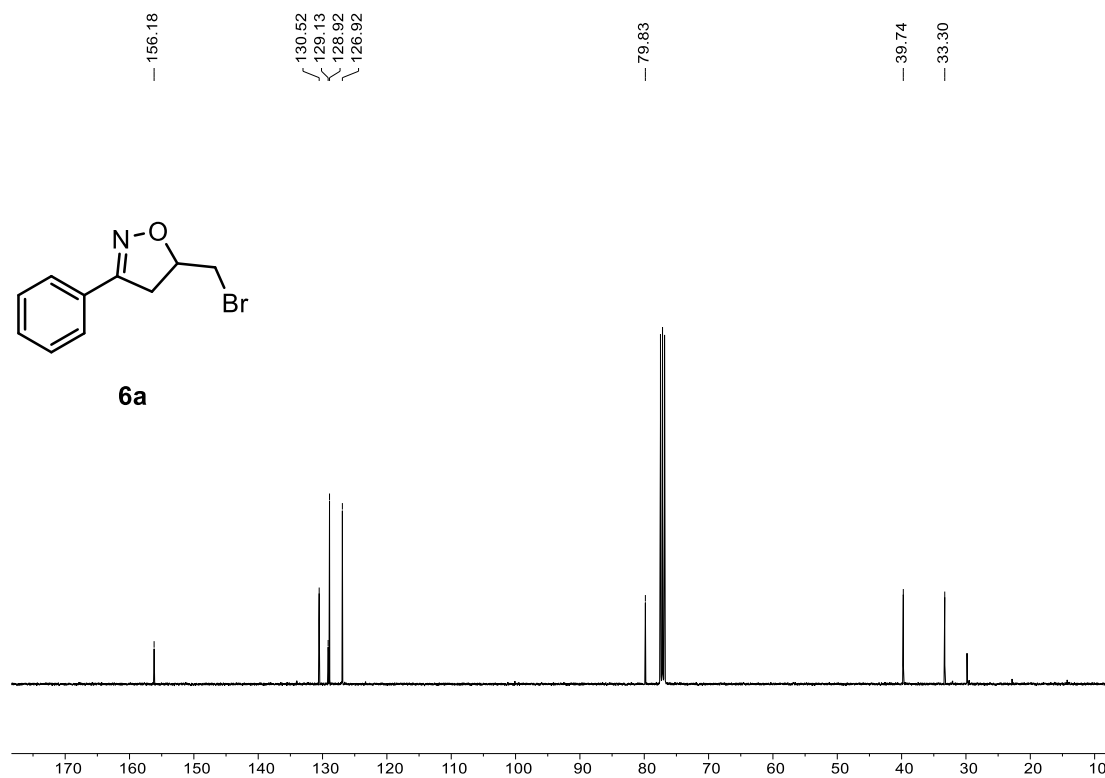

Figure S131. <sup>13</sup>C NMR of 5-(bromomethyl)-3-phenyl-4,5-dihydroisoxazole (**6a**)

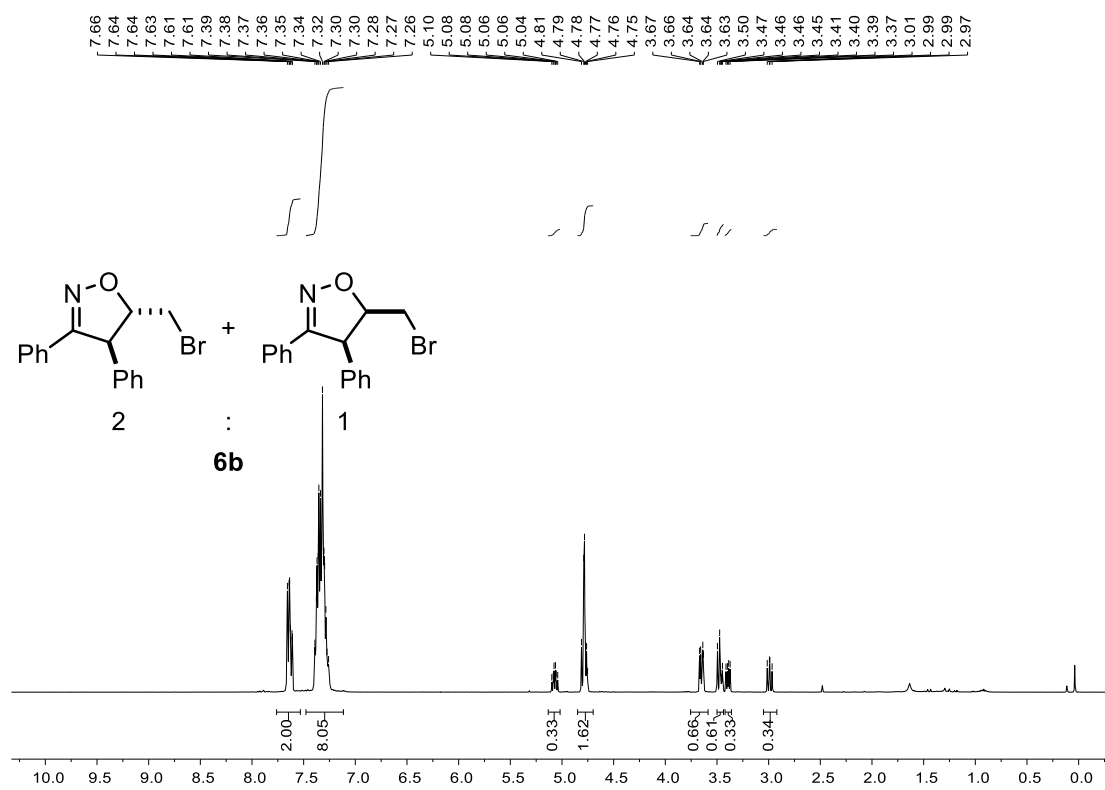

Figure S132. <sup>1</sup>H NMR of 5-(bromomethyl)-3,4-diphenyl-4,5-dihydroisoxazole (**6b**, **6b'**)

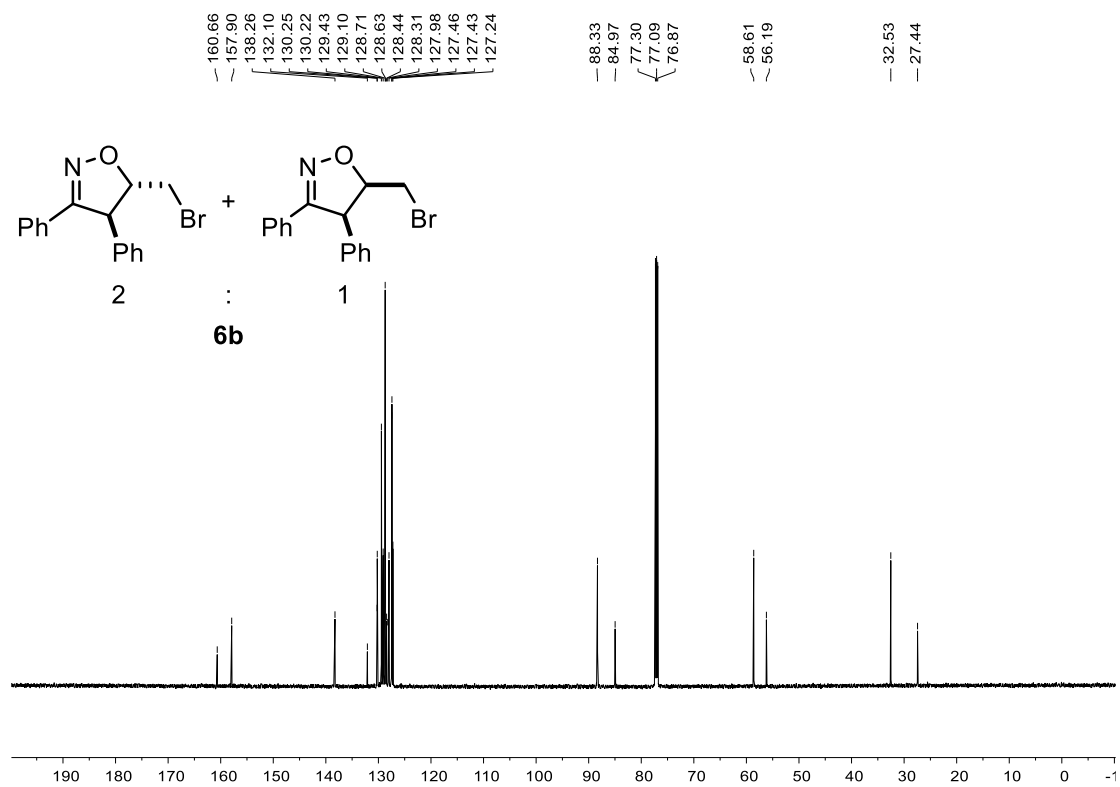

Figure S133. <sup>13</sup>C NMR of 5-(bromomethyl)-3,4-diphenyl-4,5-dihydroisoxazole (**6b**, **6b'**)

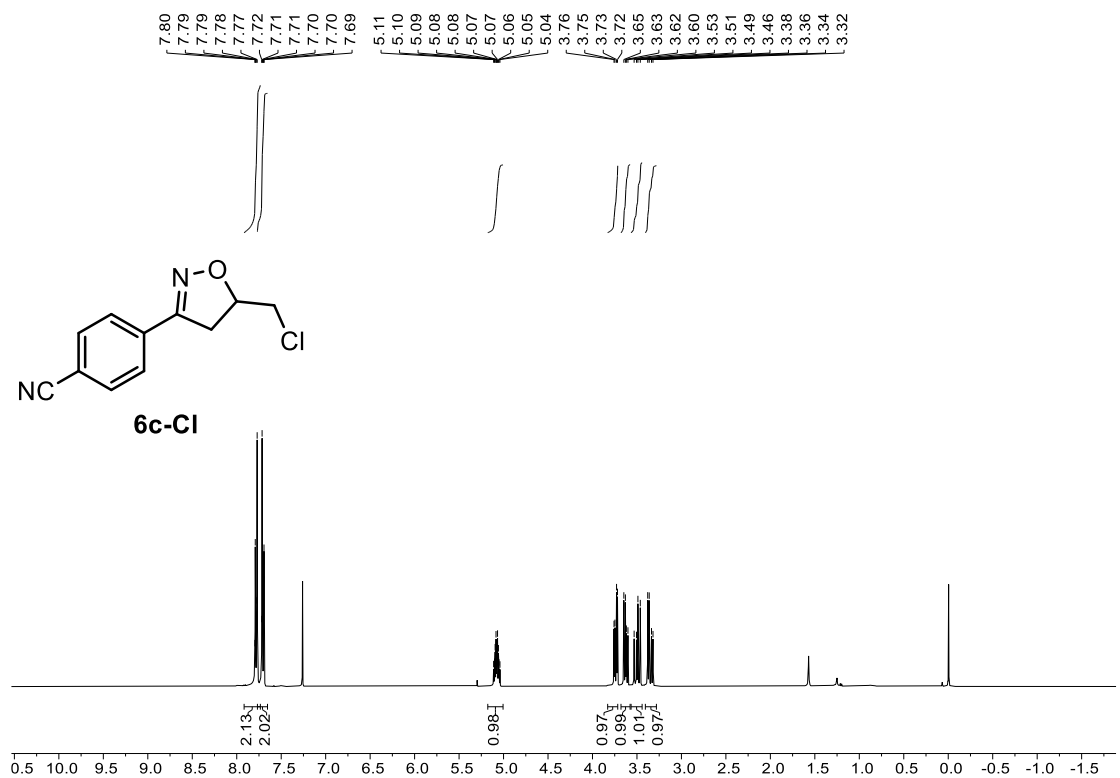

Figure S134. <sup>1</sup>H NMR of 4-(5-(chloromethyl)-4,5-dihydroisoxazol-3-yl)benzonitrile (**6c-Cl**)

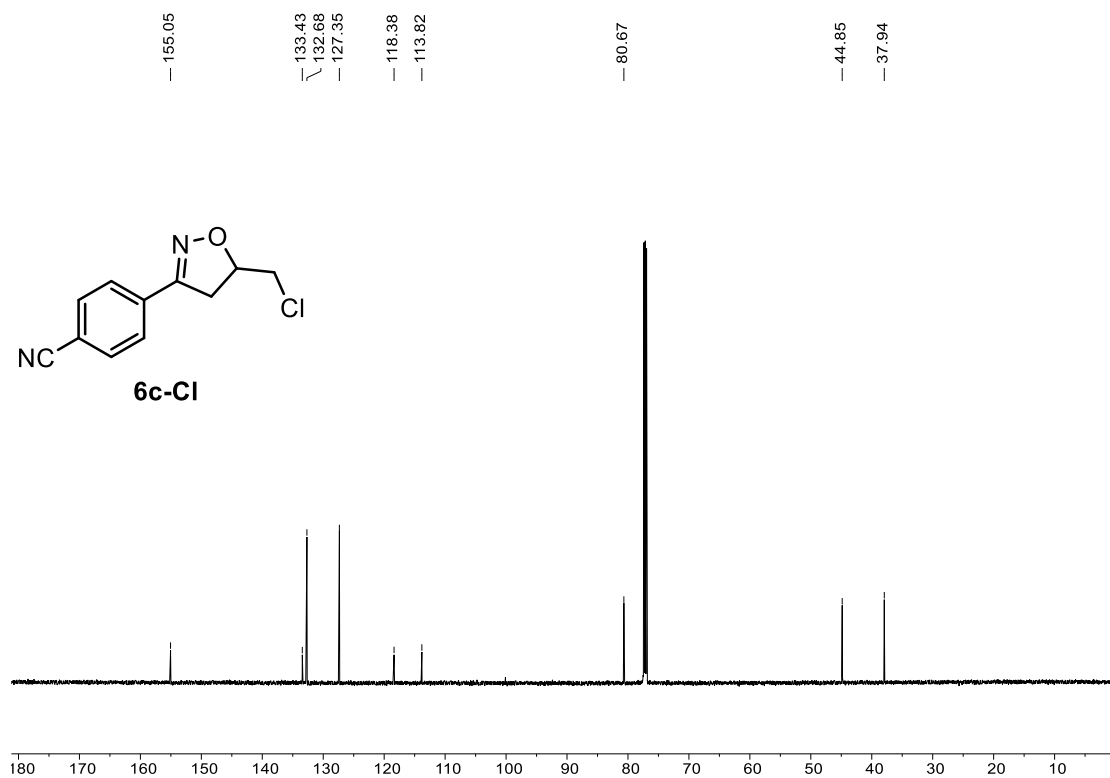

Figure S135.  $^{13}\text{C}$  NMR of 4-(5-(chloromethyl)-4,5-dihydroisoxazol-3-yl)benzonitrile (**6c-Cl**)

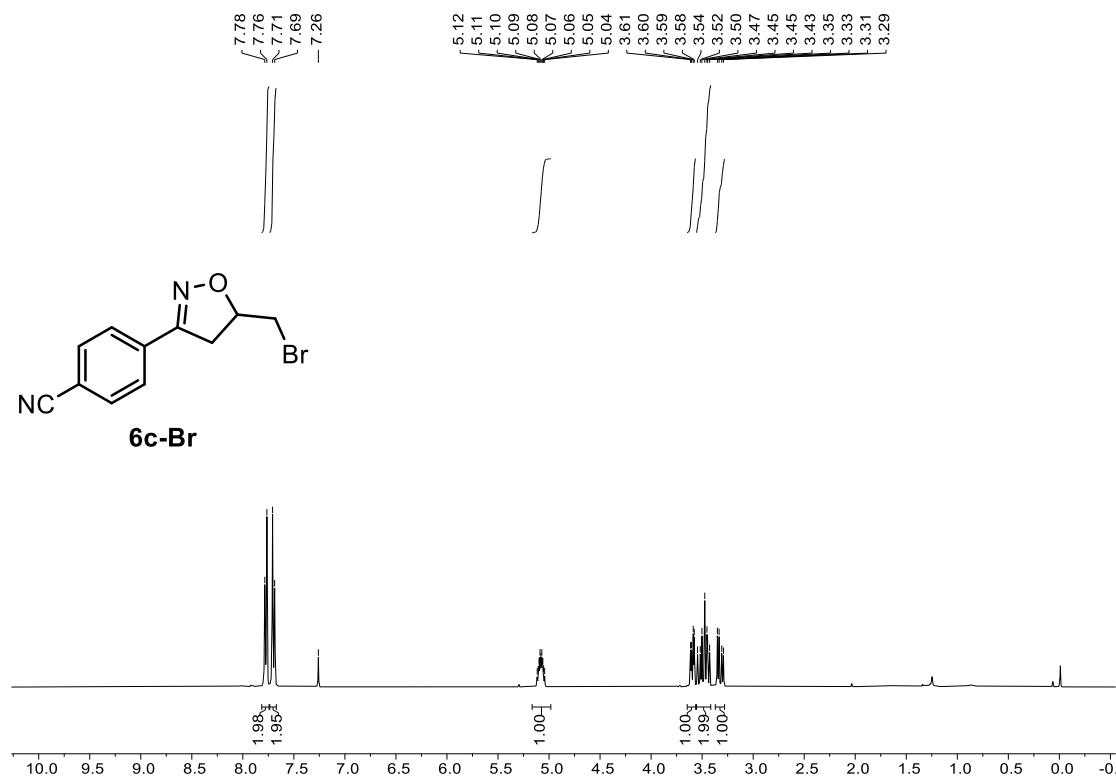

Figure S136.  $^1\text{H}$  NMR of 4-(5-(bromomethyl)-4,5-dihydroisoxazol-3-yl)benzonitrile (**6c-Br**)

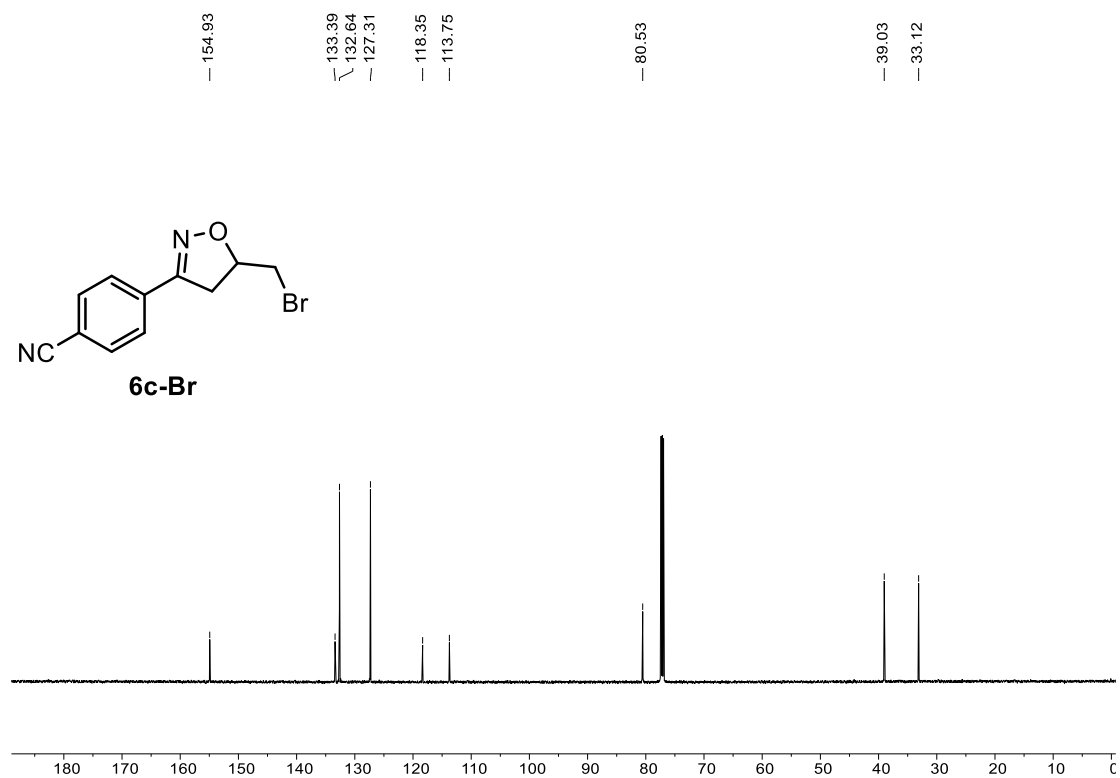

**Figure S137.**  $^{13}\text{C}$  NMR of 4-(5-(bromomethyl)-4,5-dihydroisoxazol-3-yl)benzonitrile (**6c-Br**)

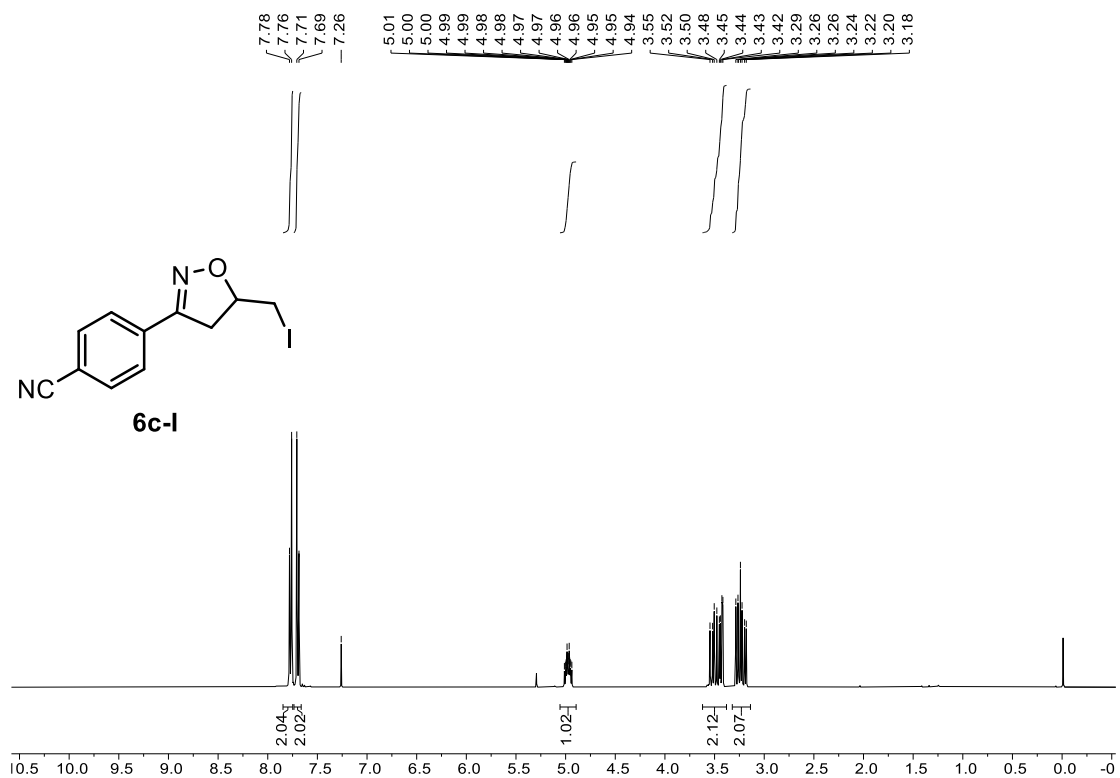

**Figure S138.**  $^1\text{H}$  NMR of 4-(5-(iodomethyl)-4,5-dihydroisoxazol-3-yl)benzonitrile (**6c-I**)

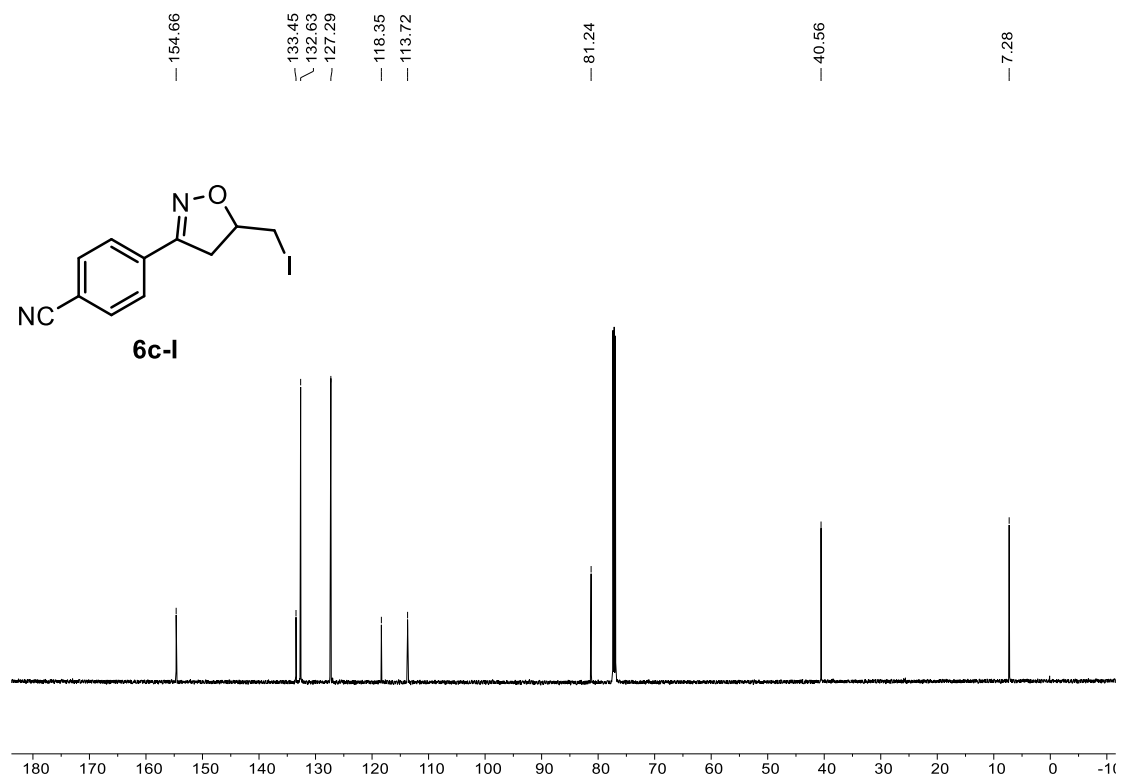

Figure S139.  $^{13}\text{C}$  NMR of 4-(5-(iodomethyl)-4,5-dihydroisoxazol-3-yl)benzonitrile (**6c-I**)

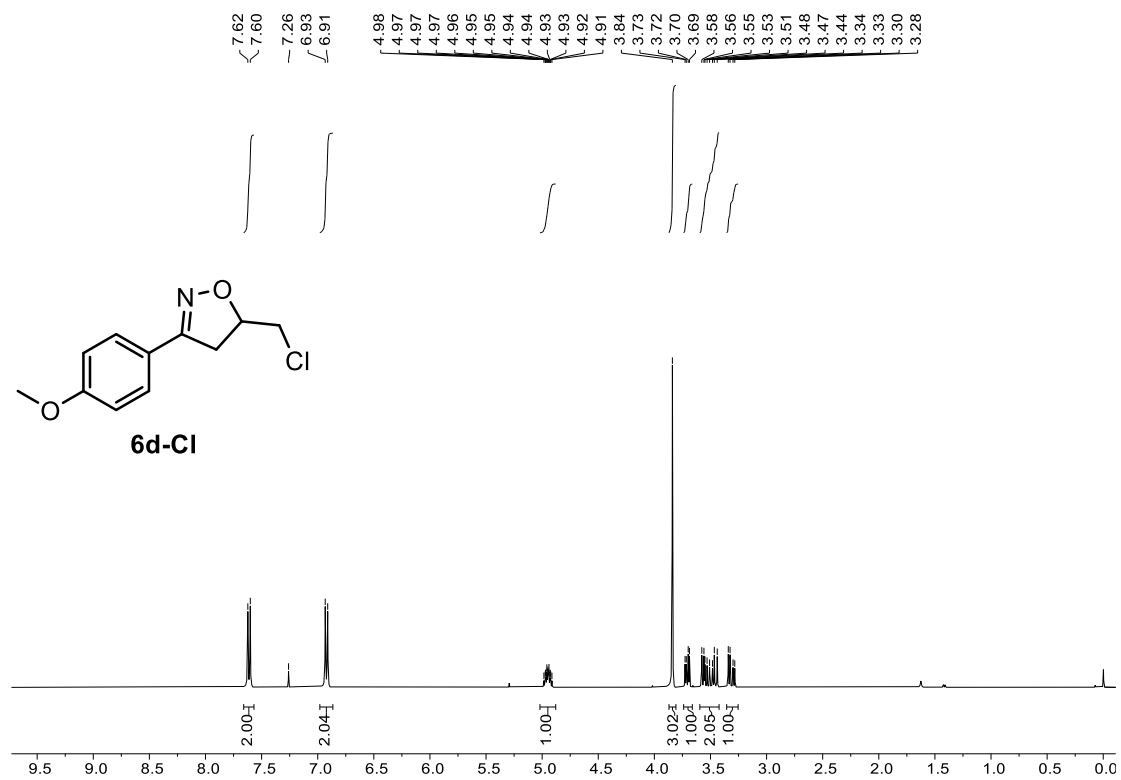

Figure S140.  $^1\text{H}$  NMR of 5-(chloromethyl)-3-(4-methoxyphenyl)-4,5-dihydroisoxazole (**6d-Cl**)

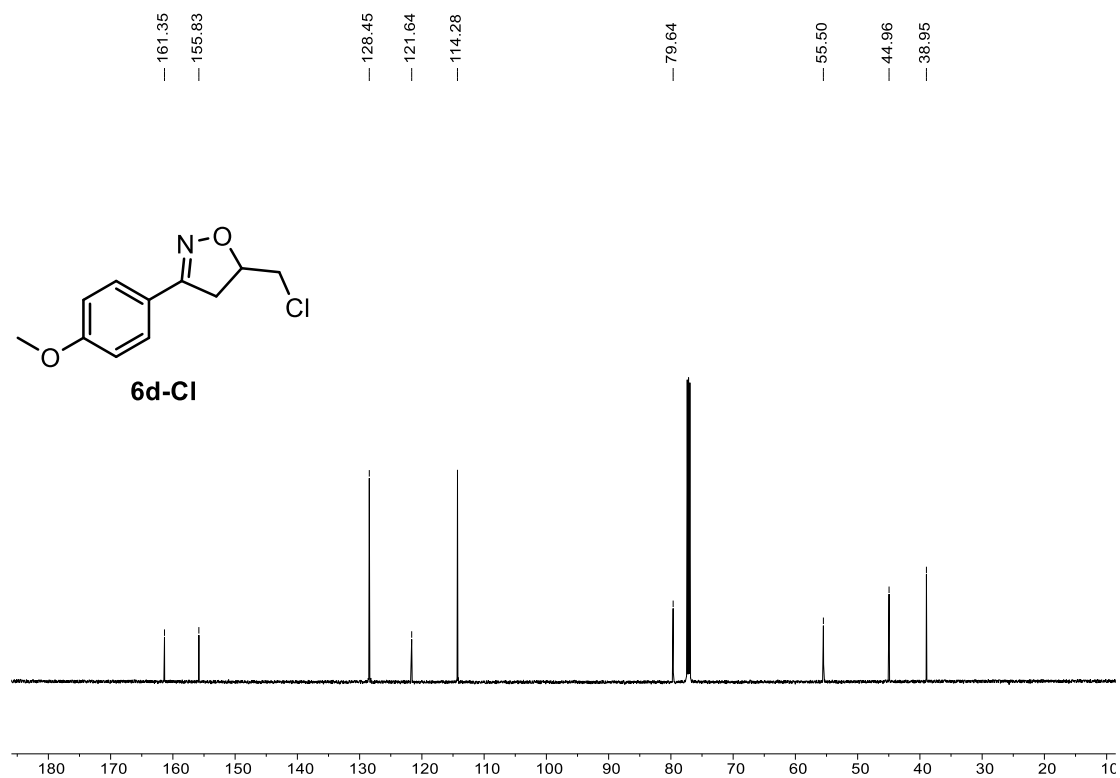

Figure S141.  $^{13}\text{C}$  NMR of 5-(chloromethyl)-3-(4-methoxyphenyl)-4,5-dihydroisoxazole (**6d-Cl**)

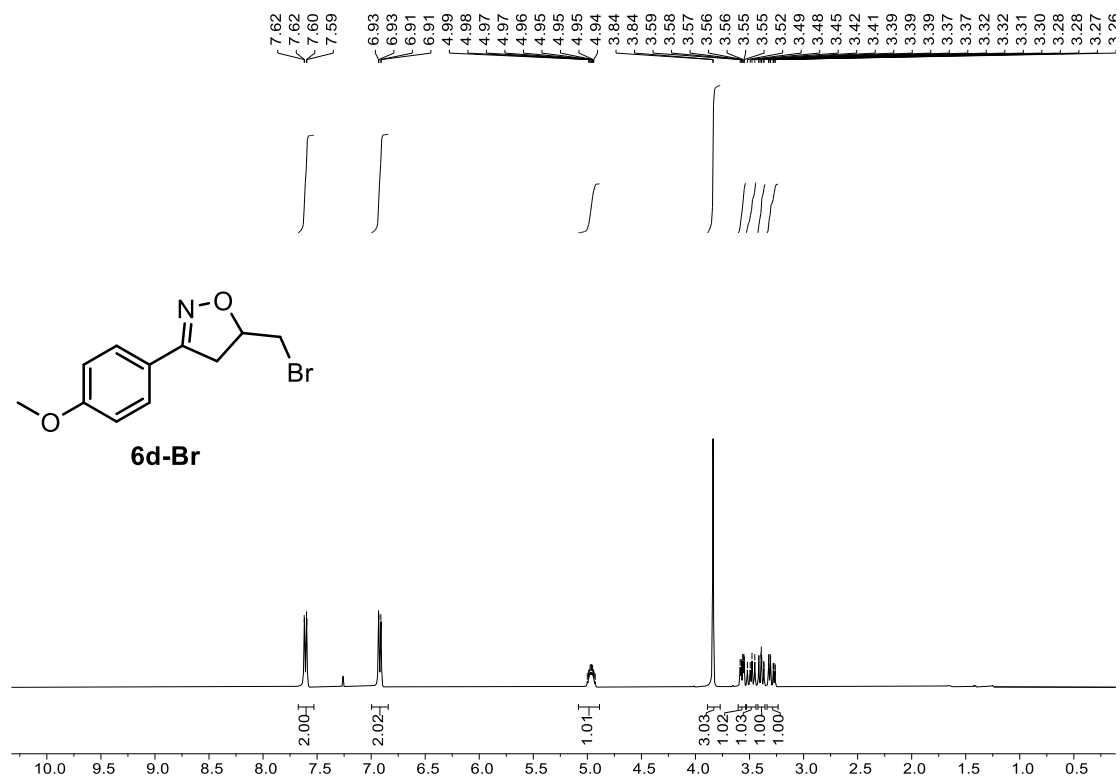

Figure S142.  $^1\text{H}$  NMR of 5-(bromomethyl)-3-(4-methoxyphenyl)-4,5-dihydroisoxazole (**6d-Br**)



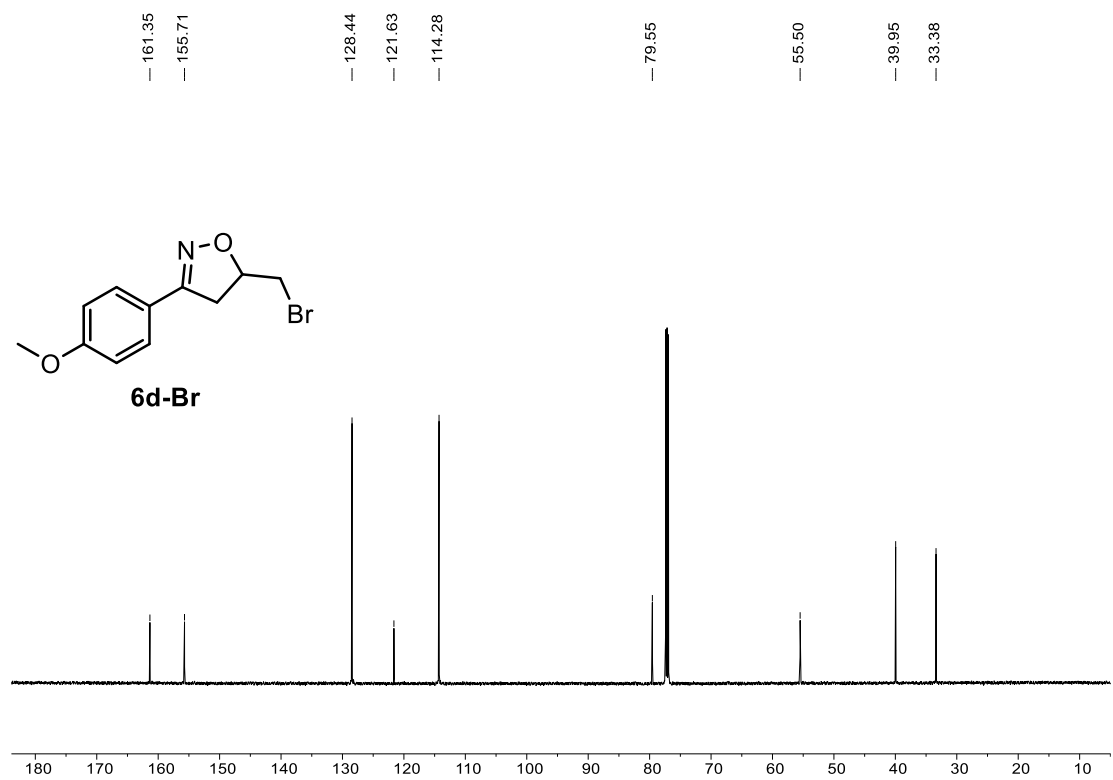

Figure S143.  $^{13}\text{C}$  NMR of 5-(bromomethyl)-3-(4-methoxyphenyl)-4,5-dihydroisoxazole (**6d-Br**)

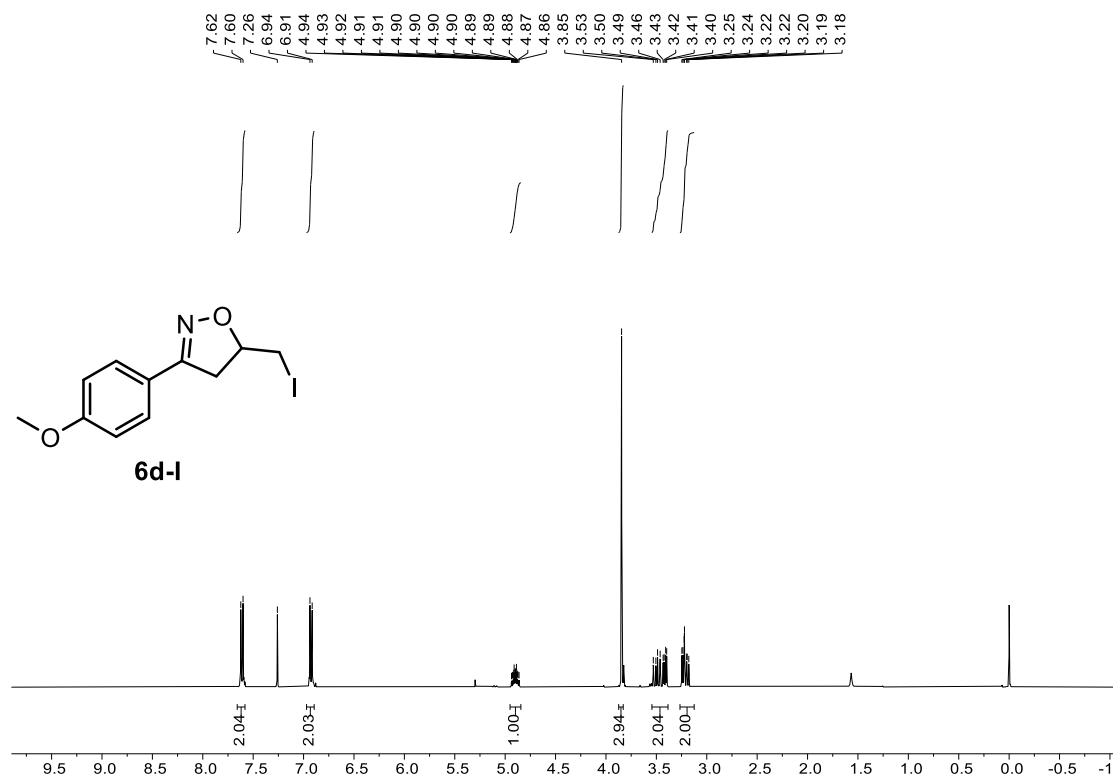

Figure S144.  $^1\text{H}$  NMR of 5-(iodomethyl)-3-(4-methoxyphenyl)-4,5-dihydroisoxazole (**6d-I**)

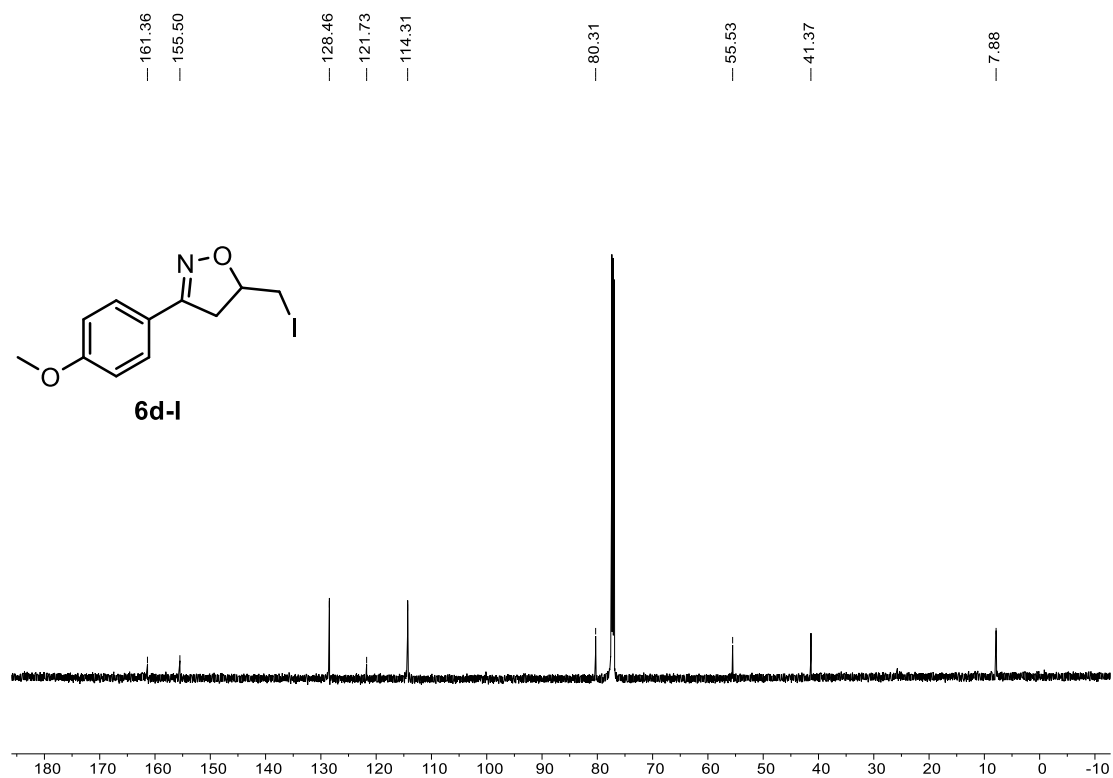

Figure S145. <sup>13</sup>C NMR of 5-(iodomethyl)-3-(4-methoxyphenyl)-4,5-dihydroisoxazole (**6d-I**)

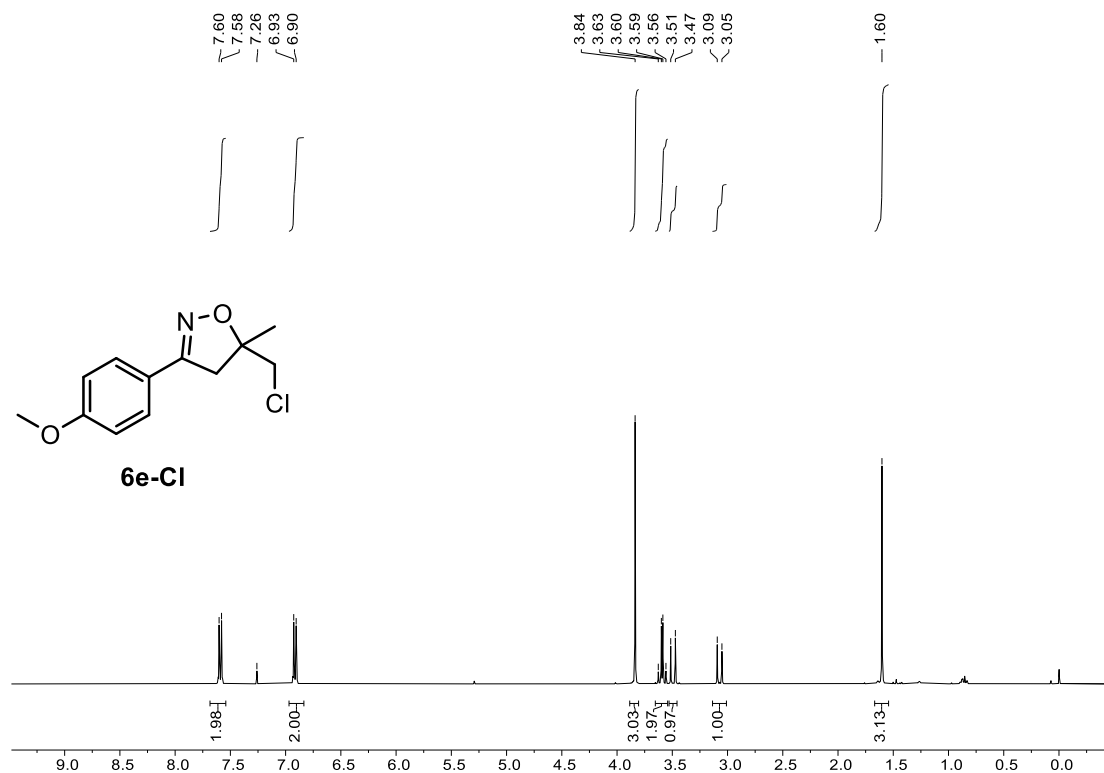

Figure S146. <sup>1</sup>H NMR of 5-(chloromethyl)-3-(4-methoxyphenyl)-5-methyl-4,5-dihydroisoxazole (**6e-Cl**)

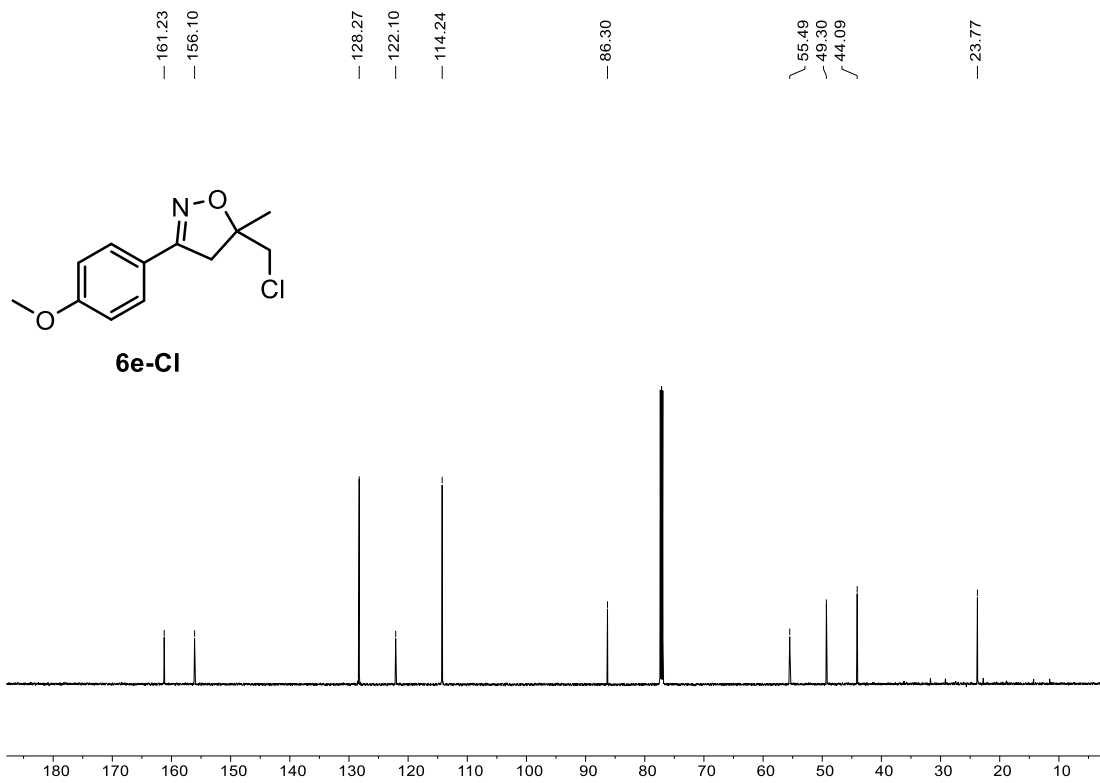

Figure S147. <sup>13</sup>C NMR of 5-(chloromethyl)-3-(4-methoxyphenyl)-5-methyl-4,5-dihydroisoxazole (**6e-Cl**)

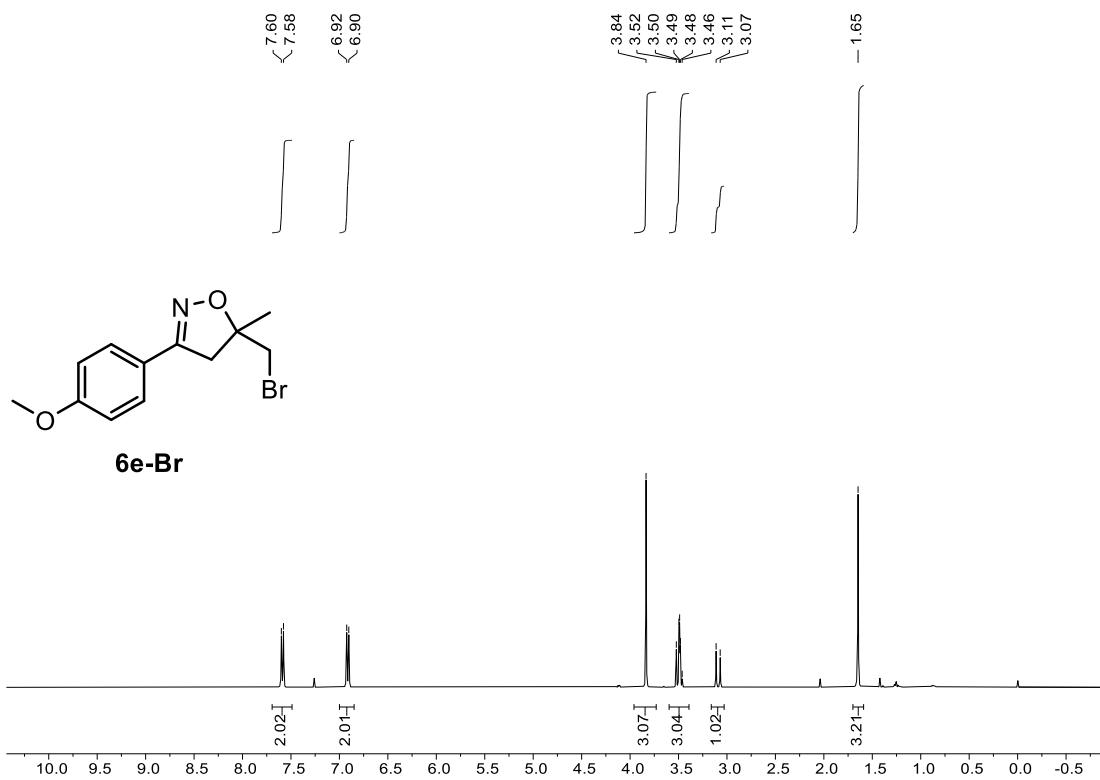

Figure S148. <sup>1</sup>H NMR of 5-(bromomethyl)-3-(4-methoxyphenyl)-5-methyl-4,5-dihydroisoxazole (**6e-Br**)

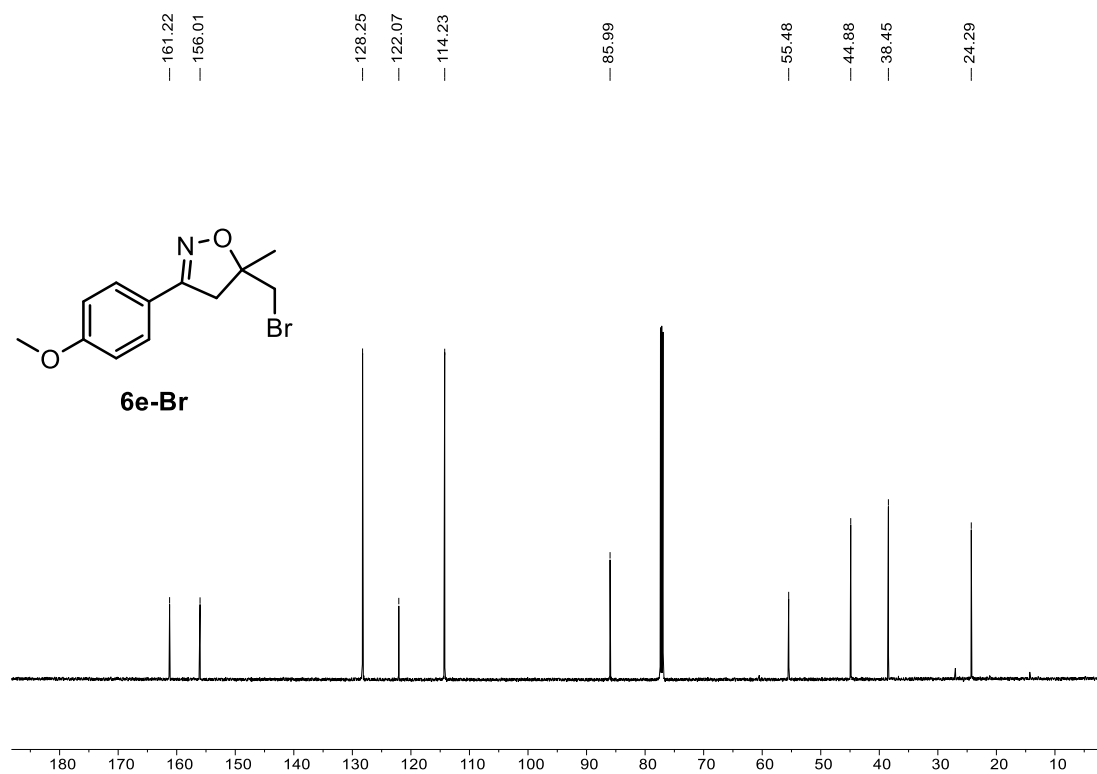

**Figure S149.**  $^{13}\text{C}$  NMR of 5-(bromomethyl)-3-(4-methoxyphenyl)-5-methyl-4,5-dihydroisoxazole (**6e-Br**)

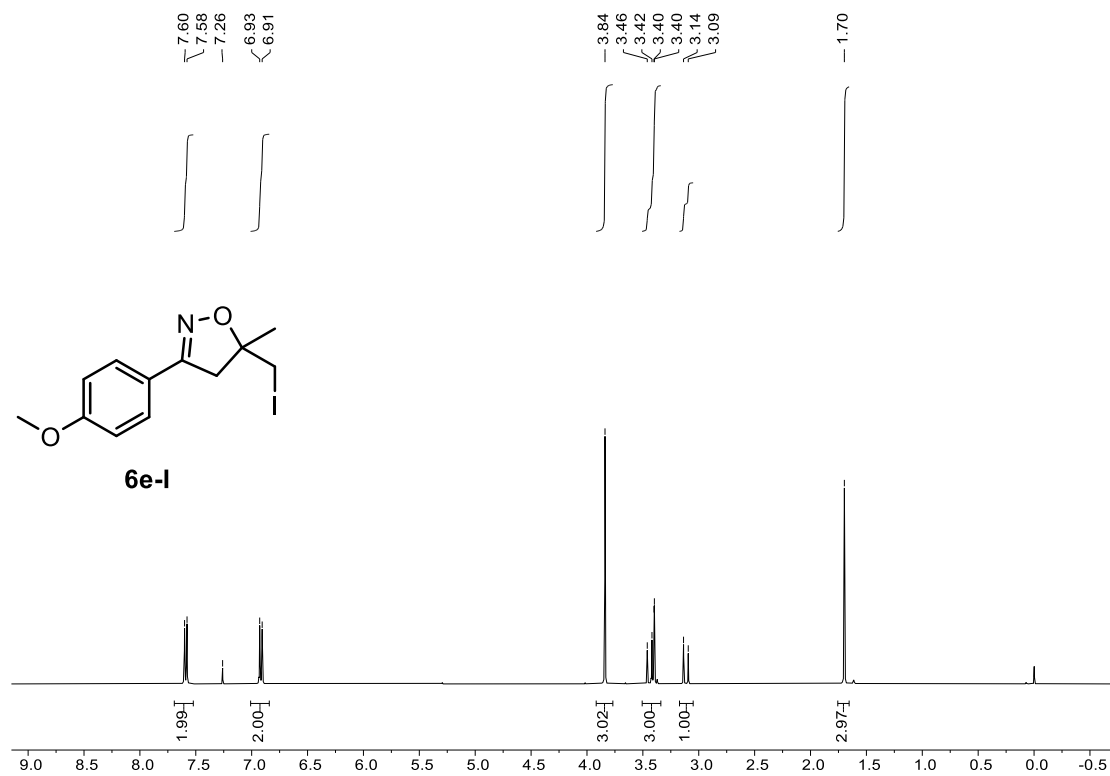

**Figure S150.**  $^1\text{H}$  NMR of 5-(iodomethyl)-3-(4-methoxyphenyl)-5-methyl-4,5-dihydroisoxazole (**6e-I**)

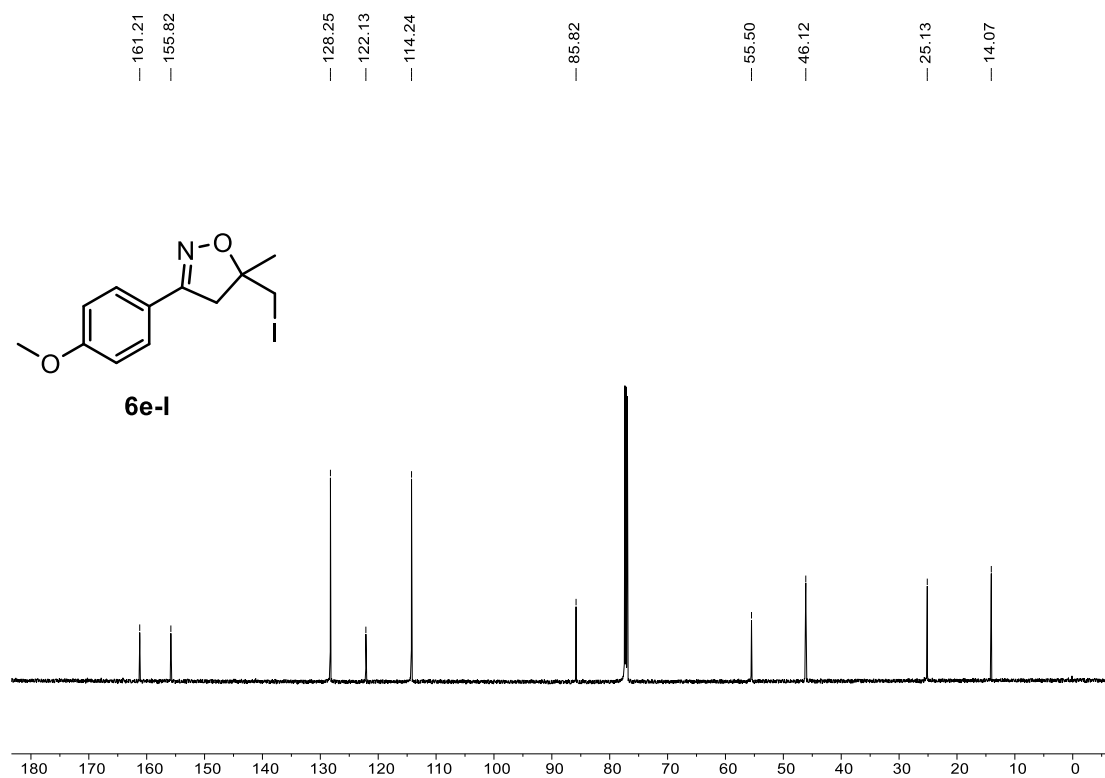

**Figure S151.**  $^{13}\text{C}$  NMR of 5-(iodomethyl)-3-(4-methoxyphenyl)-5-methyl-4,5-dihydroisoxazole (**6e-I**)

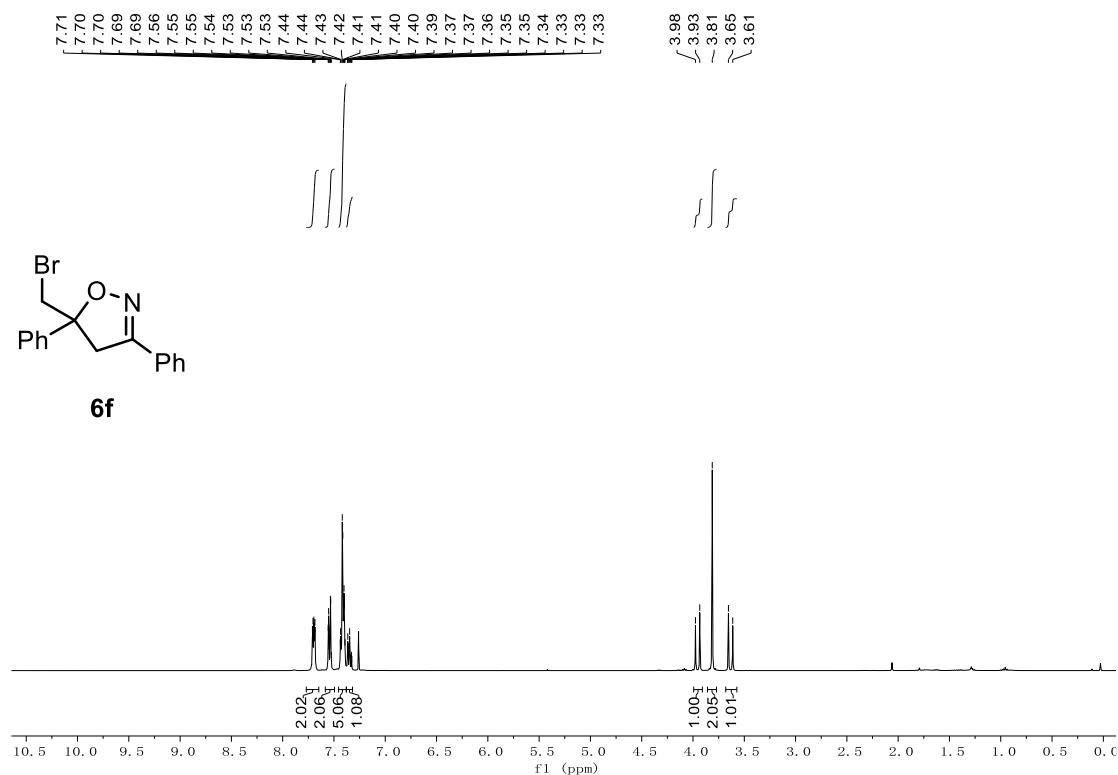

**Figure S152.**  $^1\text{H}$  NMR of 5-(bromomethyl)-3,5-diphenyl-4,5-dihydroisoxazole (**6f**)

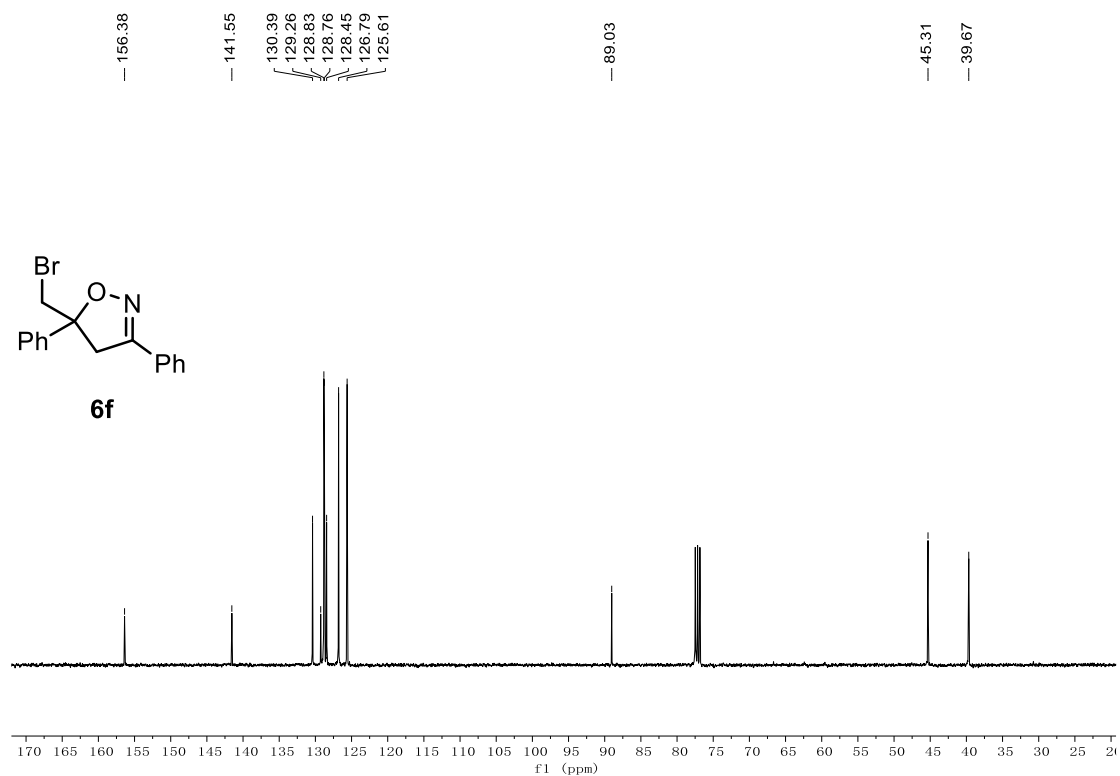

Figure S153. <sup>13</sup>C NMR of 5-(bromomethyl)-3,5-diphenyl-4,5-dihydroisoxazole (**6f**)

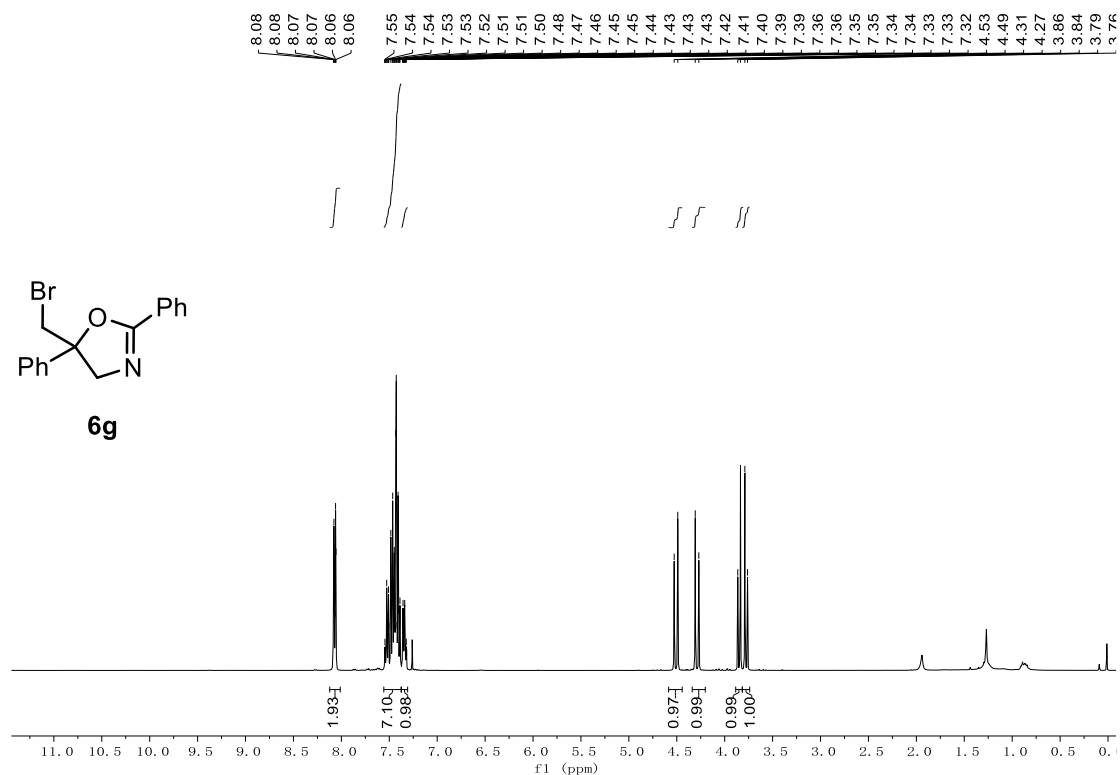

Figure S154. <sup>1</sup>H NMR of 5-(bromomethyl)-2,5-diphenyl-4,5-dihydrooxazole (**6g**)

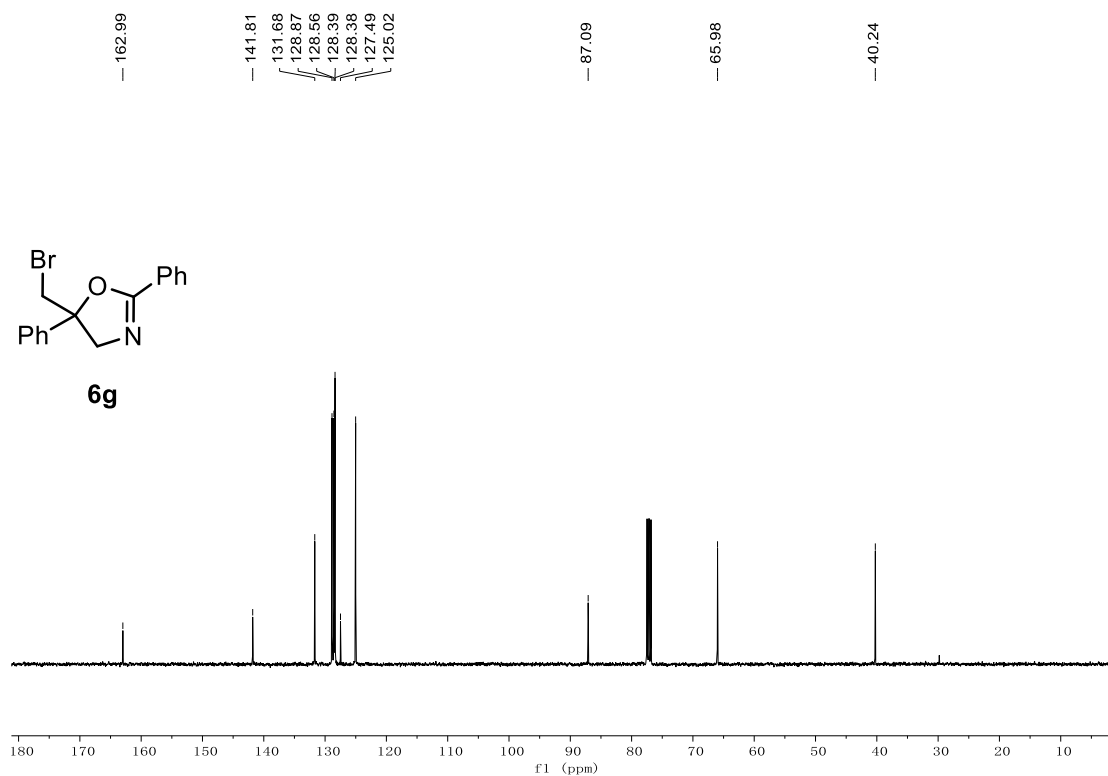

Figure S155. <sup>13</sup>C NMR of 5-(bromomethyl)-2,5-diphenyl-4,5-dihydrooxazole (**6g**)

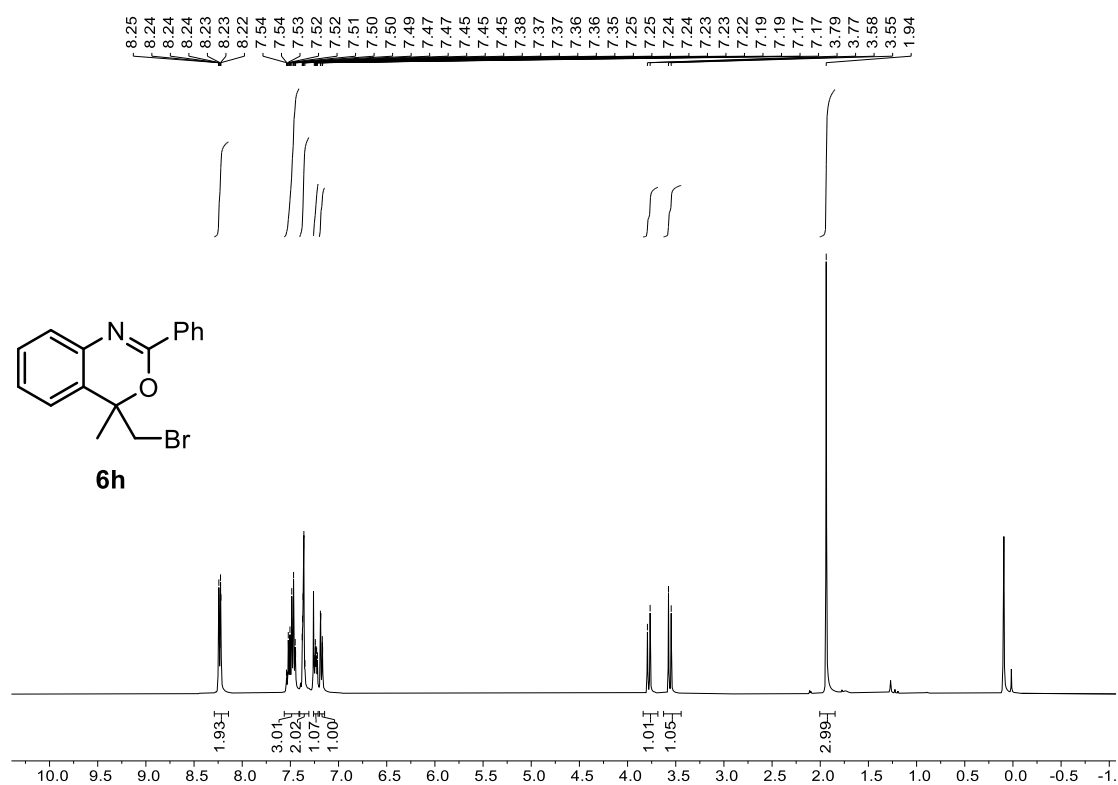

Figure S156. <sup>1</sup>H NMR of 4-(bromomethyl)-4-methyl-2-phenyl-4H-benzo[d][1,3]oxazine (**6h**)

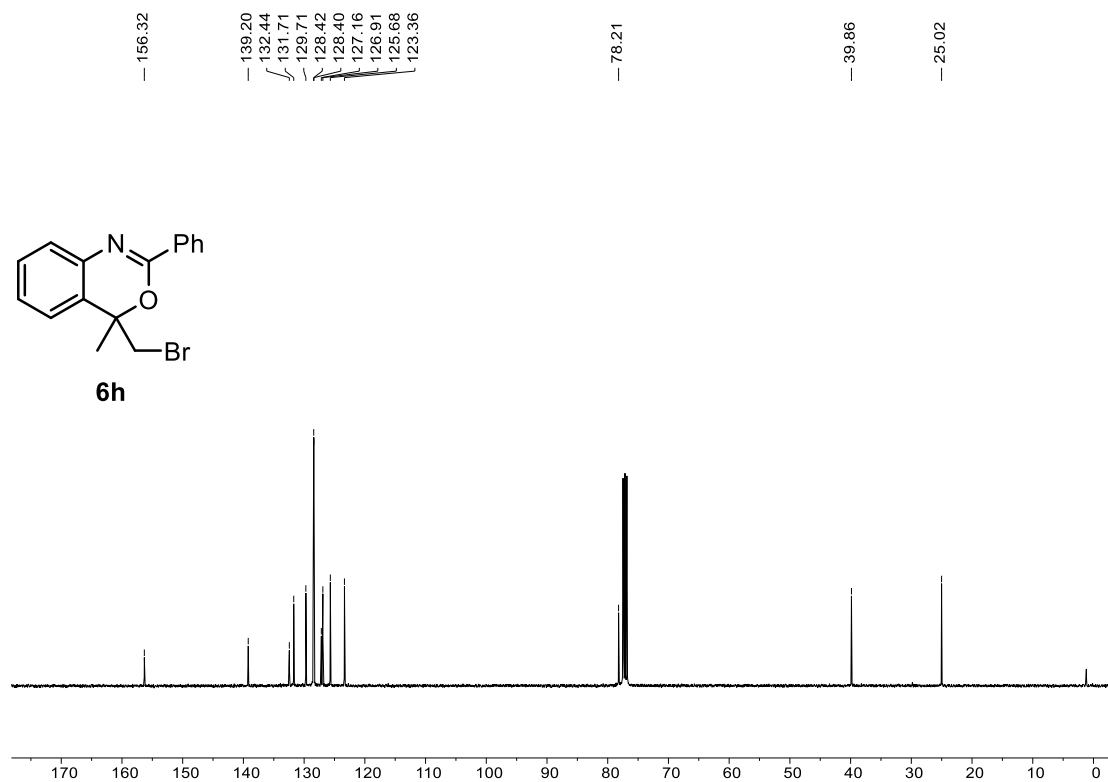

Figure S157. <sup>13</sup>C NMR of 4-(bromomethyl)-4-methyl-2-phenyl-4H-benzo[d][1,3]oxazine (**6h**)

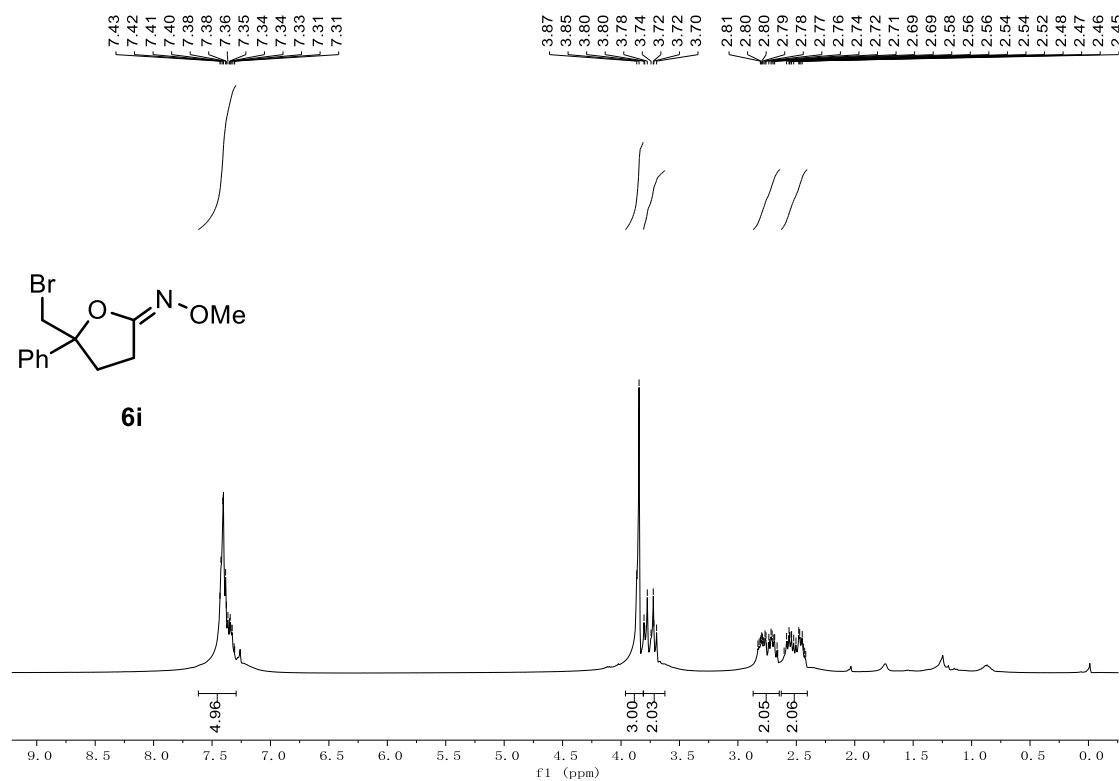

Figure S158. <sup>1</sup>H NMR of 5-(bromomethyl)-5-phenyl-2,3-dihydrofuran-2(3H)-one O-methyl oxime (**6i**)



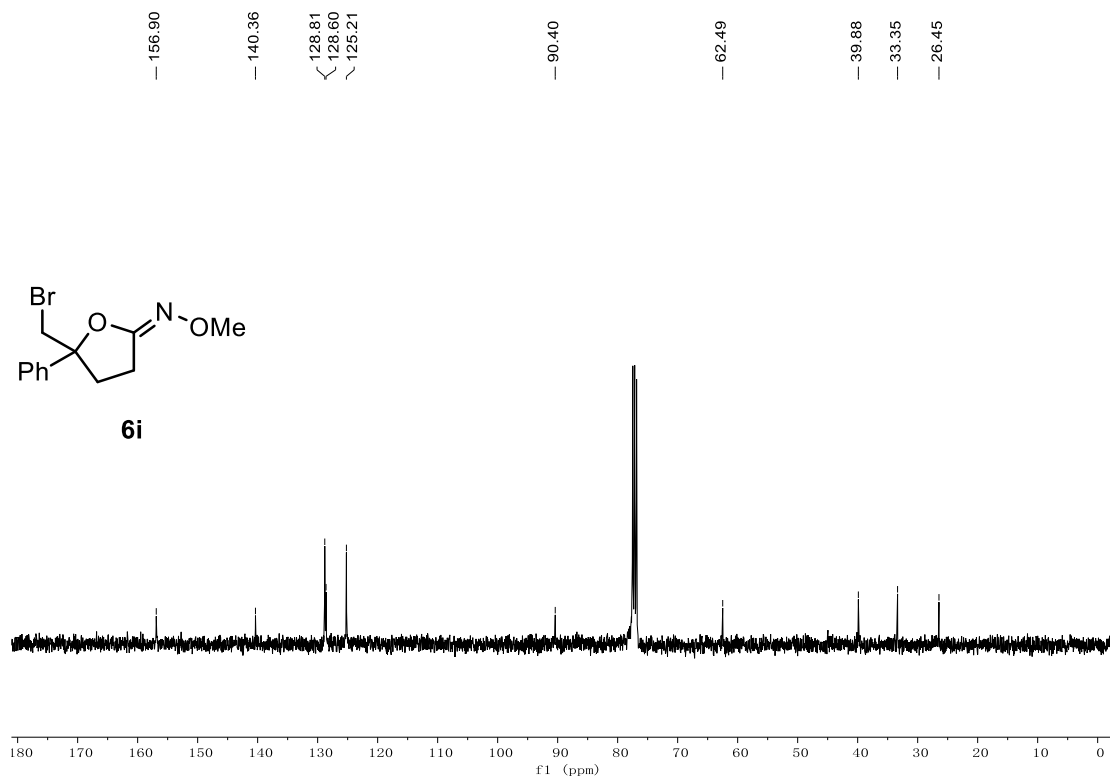

Figure S159. <sup>13</sup>C NMR of 5-(bromomethyl)-5-phenyldihydrofuran-2(3*H*)-one *O*-methyl oxime (**6i**)

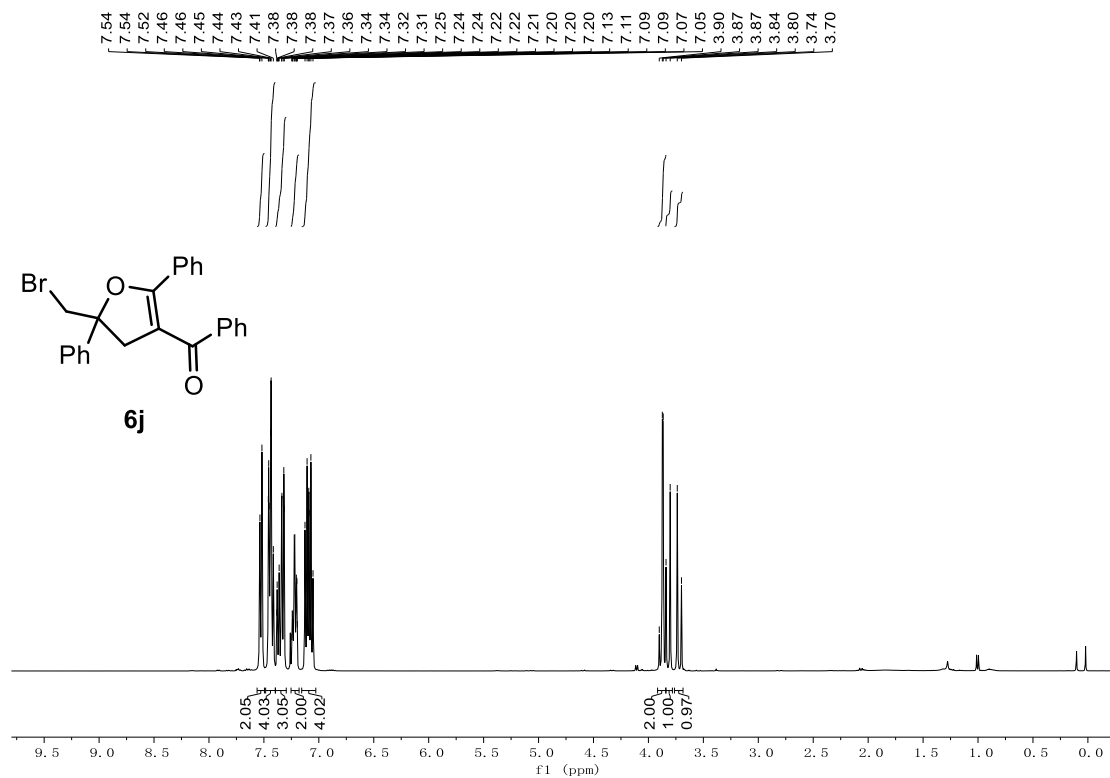

Figure S160. <sup>1</sup>H NMR of (5-(bromomethyl)-2,5-diphenyl-4,5-dihydrofuran-3-yl)(phenyl)methanone (**6j**)

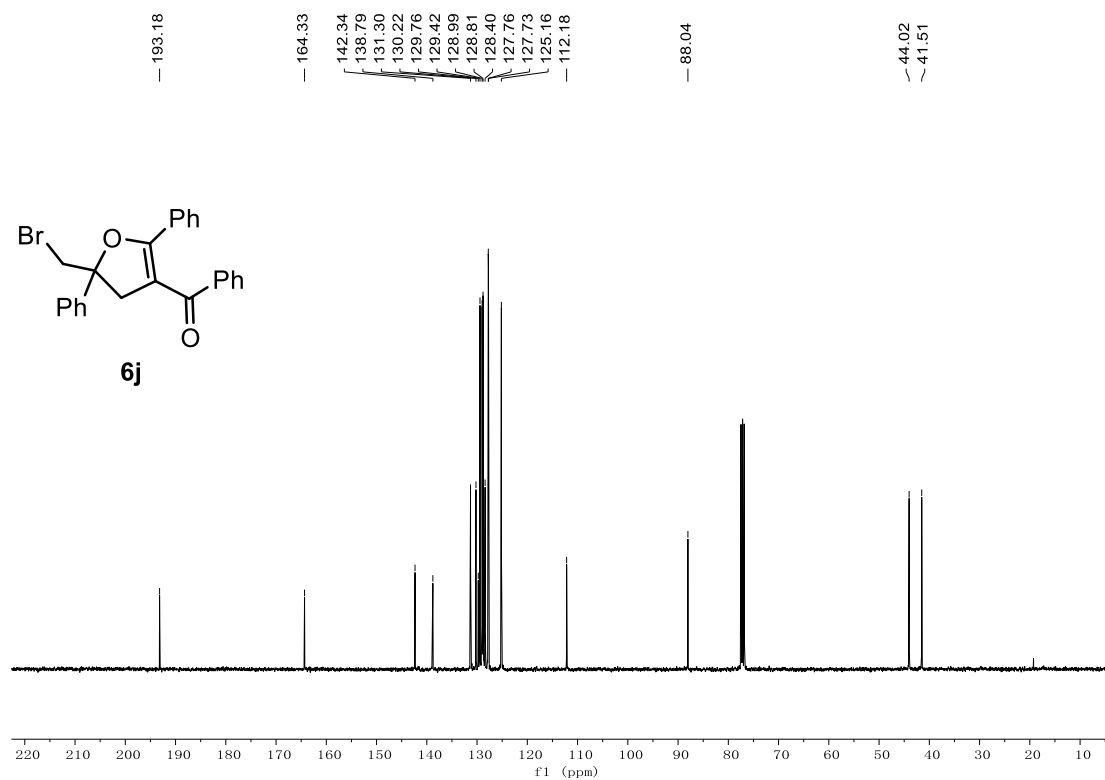

**Figure S161.** <sup>13</sup>C NMR of (5-(bromomethyl)-2,5-diphenyl-4,5-dihydrofuran-3-yl)(phenyl)methanone (**6j**)

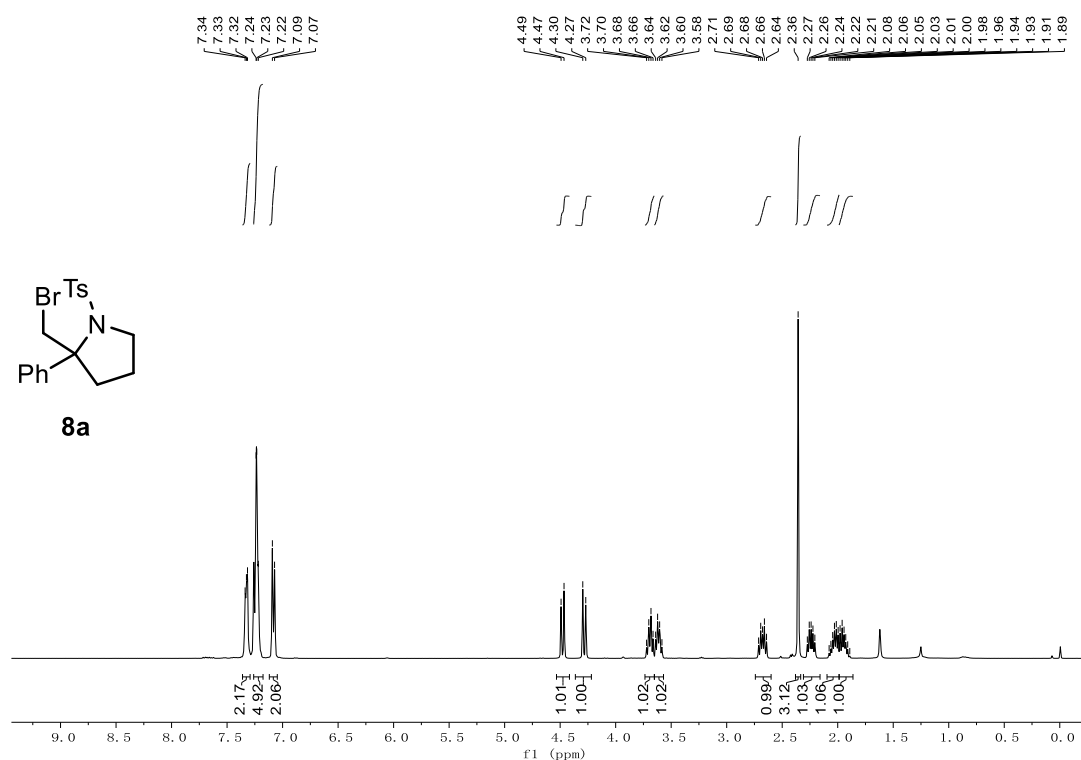

**Figure S162.** <sup>1</sup>H NMR of 2-(bromomethyl)-2-phenyl-1-tosylpyrrolidine (**8a**)

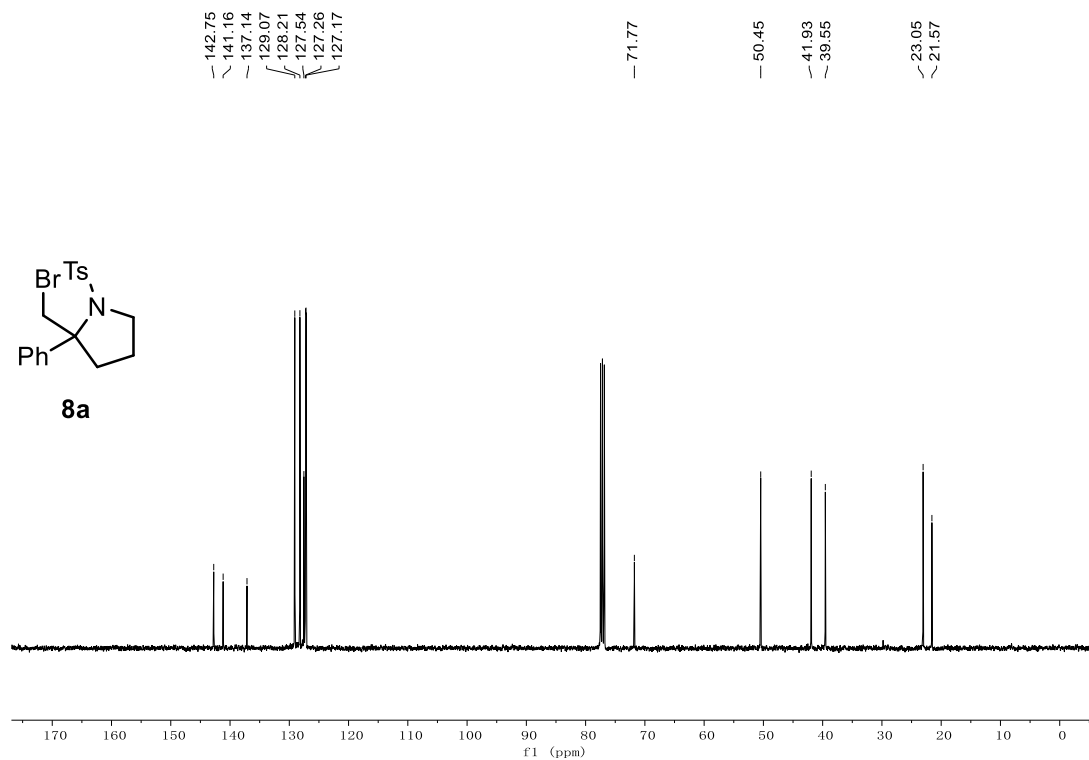

Figure S163.  $^{13}\text{C}$  NMR of 2-(bromomethyl)-2-phenyl-1-tosylpyrrolidine (**8a**)

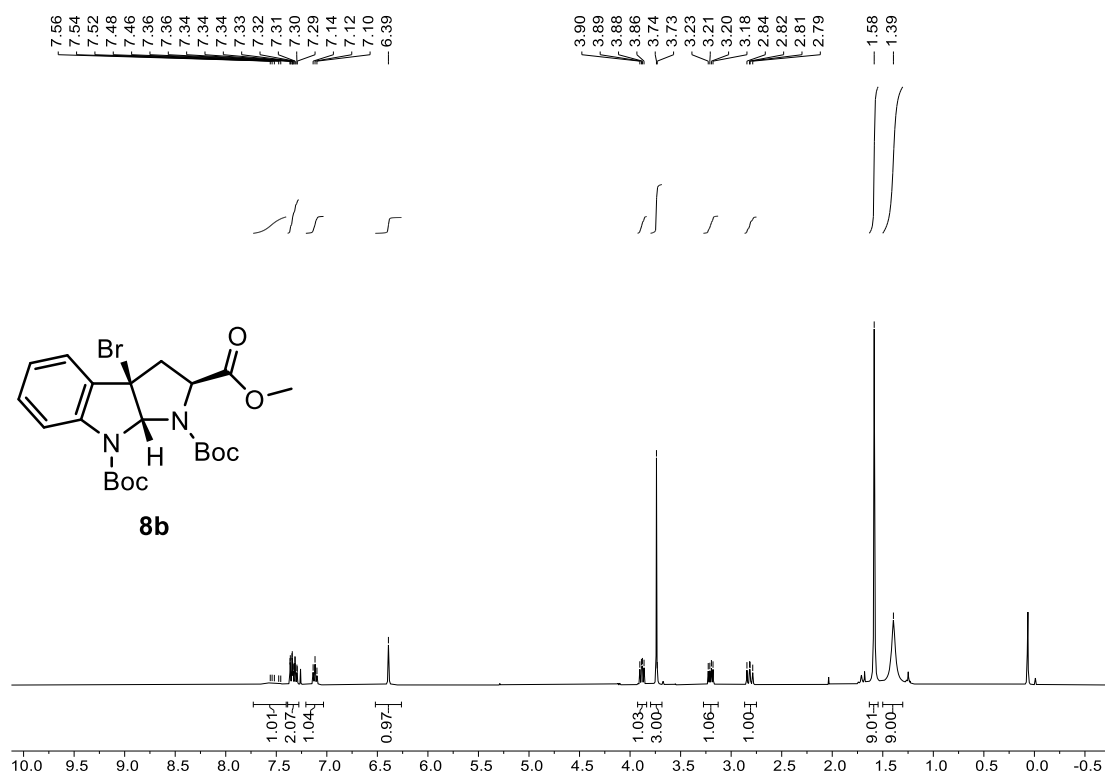

Figure S164.  $^1\text{H}$  NMR of 1,8-di-*tert*-Butyl 2-methyl (2*S*,3*aR*,8*aR*)-3*a*-bromo-2,3,3*a*,8*a*-tetrahydropyrrolo[2,3-*b*]indole-1,2,8-tricarboxylate (**8b**)

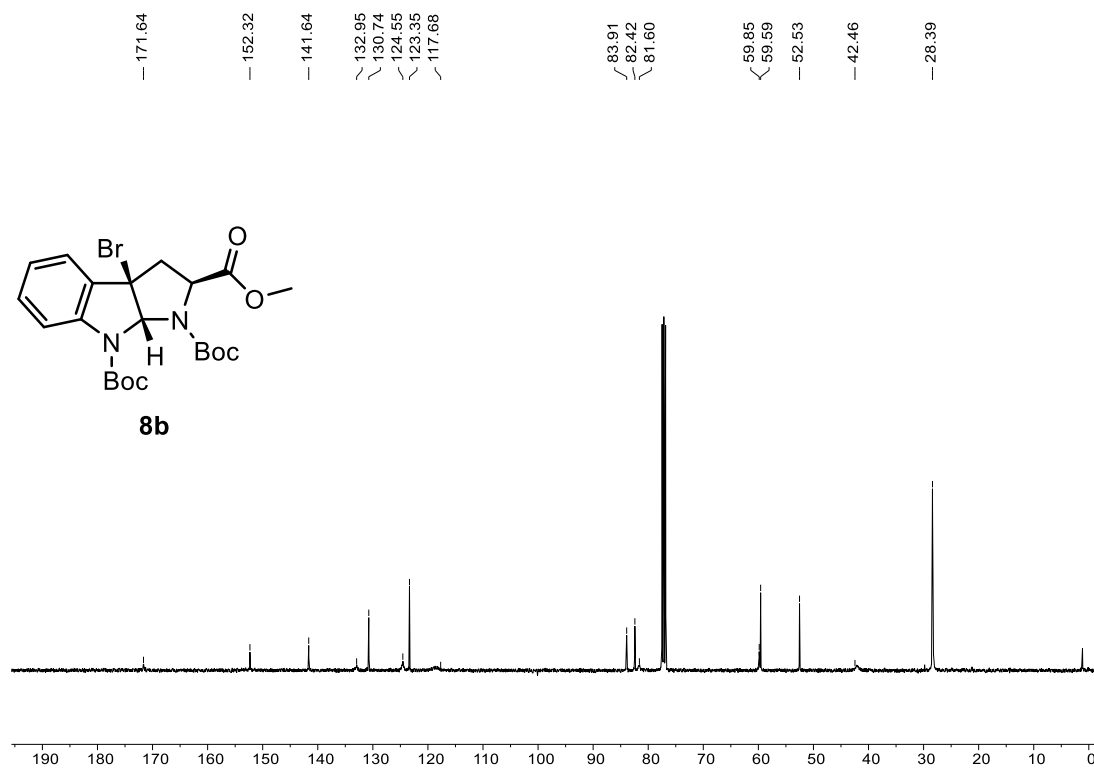

**Figure S165.** <sup>13</sup>C NMR of 1,8-di-*tert*-Butyl 2-methyl (2*S*,3*aR*,8*aR*)-3*a*-bromo-2,3,3*a*,8*a*-tetrahydropyrrolo[2,3-*b*]indole-1,2,8-tricarboxylate (**8b**)

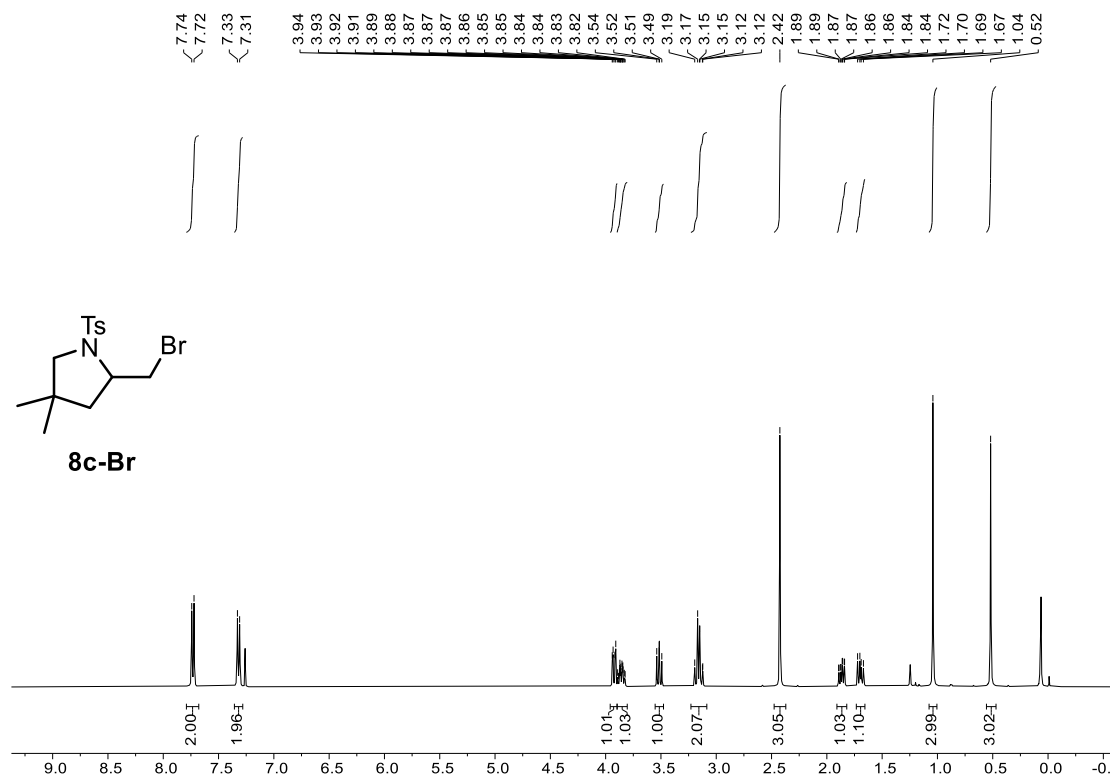

**Figure S166.** <sup>1</sup>H NMR of 2-(bromomethyl)-4,4-dimethyl-1-tosylpyrrolidine (**8c-Br**)

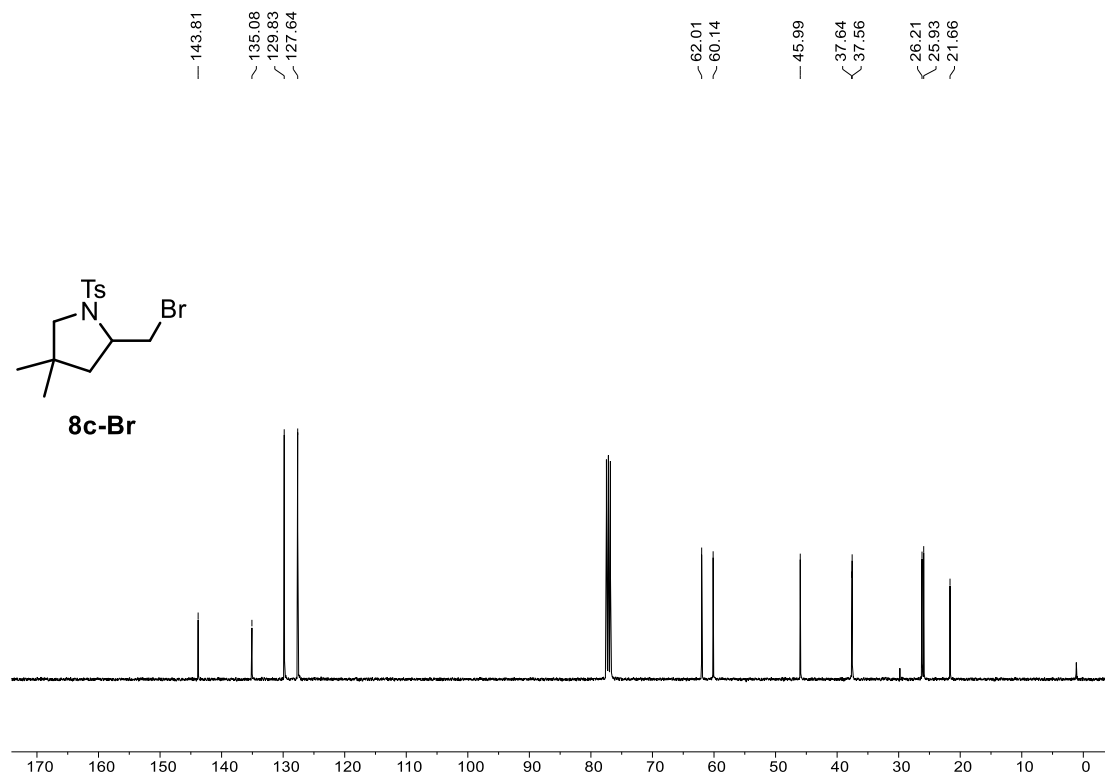

**Figure S167.**  $^{13}\text{C}$  NMR of 2-(bromomethyl)-4,4-dimethyl-1-tosylpyrrolidine (**8c-Br**)

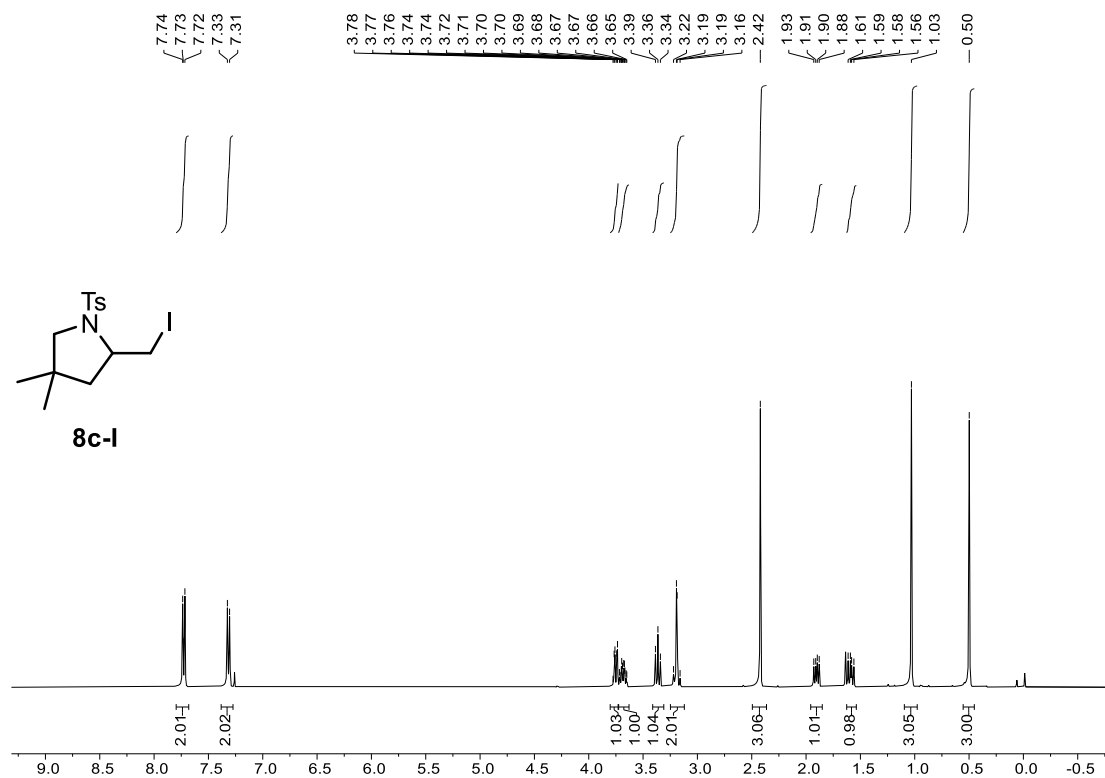

**Figure S168.**  $^1\text{H}$  NMR of 2-(iodomethyl)-4,4-dimethyl-1-tosylpyrrolidine (**8c-I**)

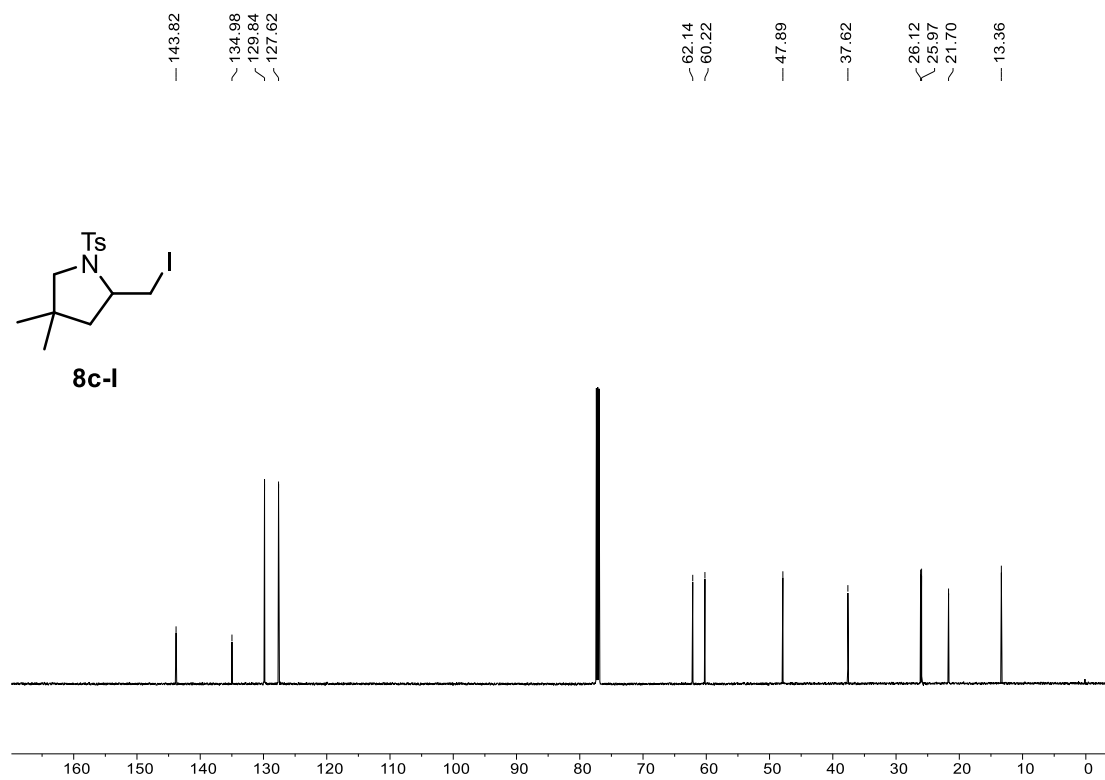

Figure S169. <sup>13</sup>C NMR of 2-(iodomethyl)-4,4-dimethyl-1-tosylpyrrolidine (**8c-I**)

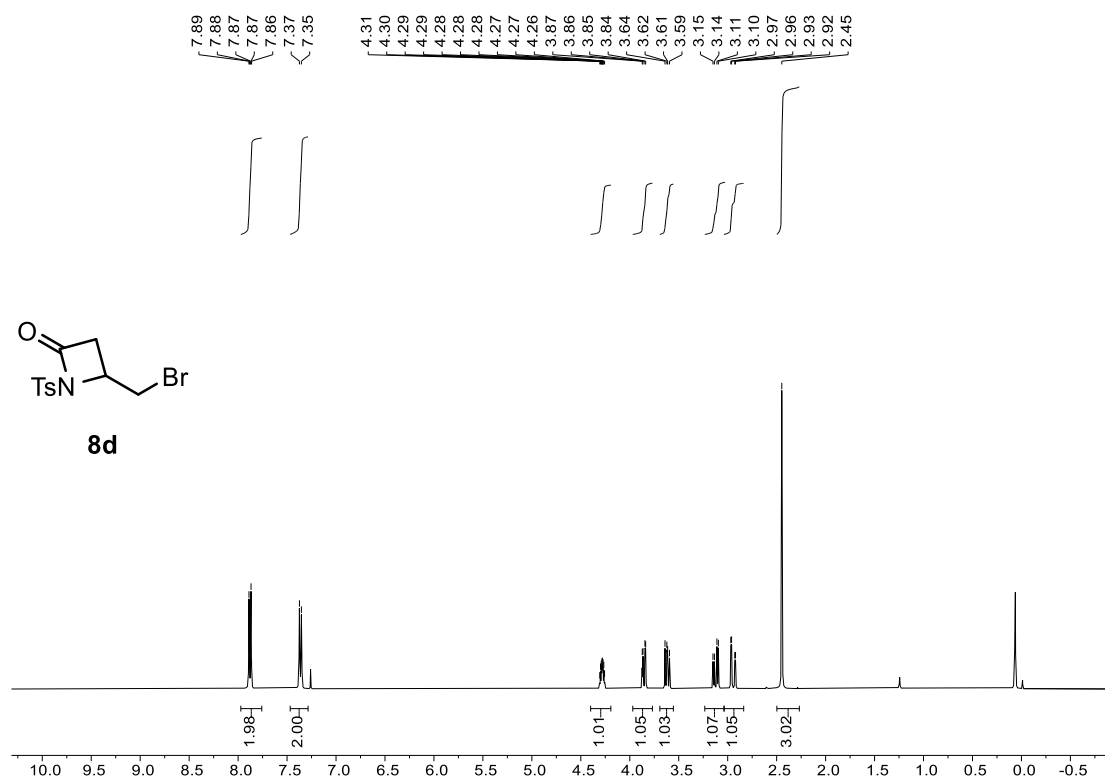

Figure S170. <sup>1</sup>H NMR of 4-(bromomethyl)-1-tosylazetidin-2-one (**8d**)

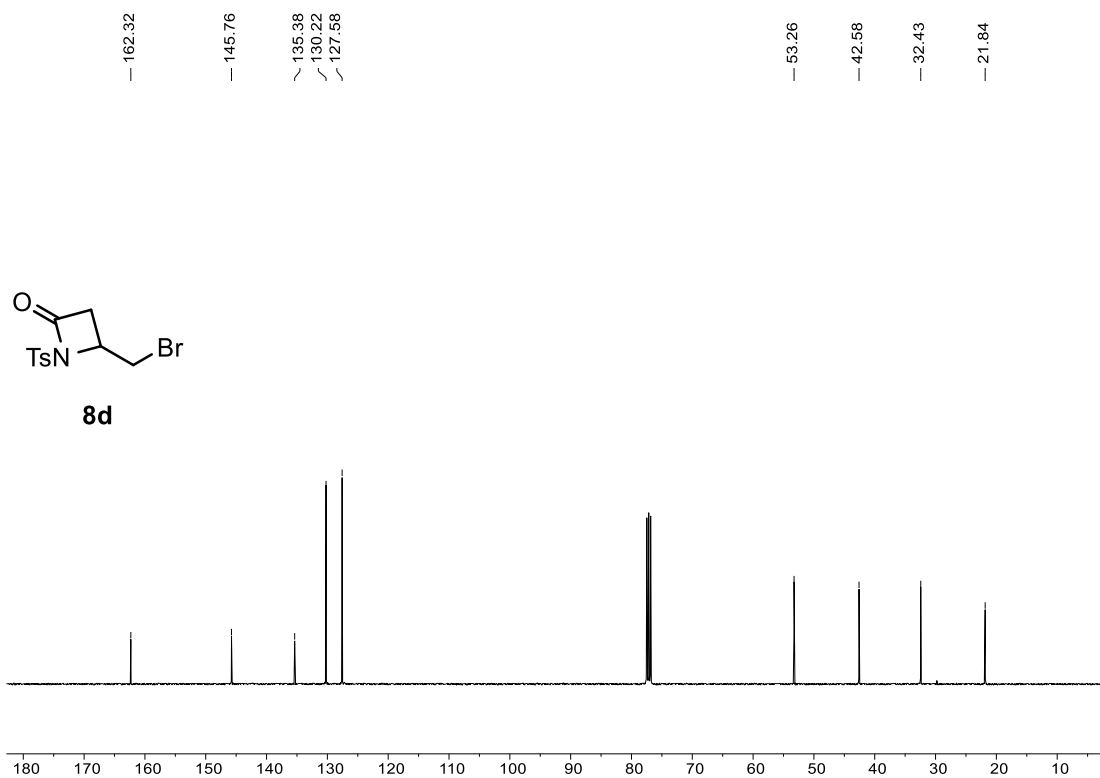

Figure S171.  $^{13}\text{C}$  NMR of 4-(bromomethyl)-1-tosylazetidin-2-one (**8d**)

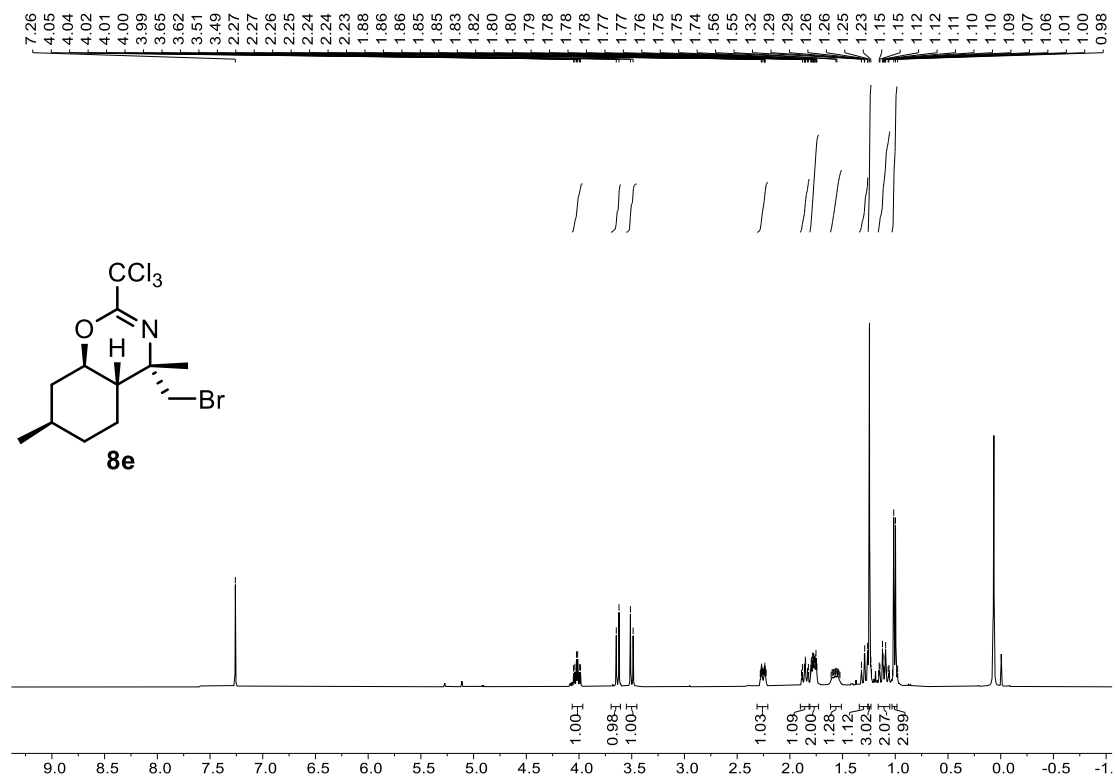

Figure S172.  $^1\text{H}$  NMR of (4*S*,4*aS*,7*R*)-4-(bromomethyl)-4,7-dimethyl-2-(trichloromethyl)-4*a*,5,6,7,8,8*a*-hexahydro-4*H*-benzo[*e*][1,3]oxazine (**8e**)

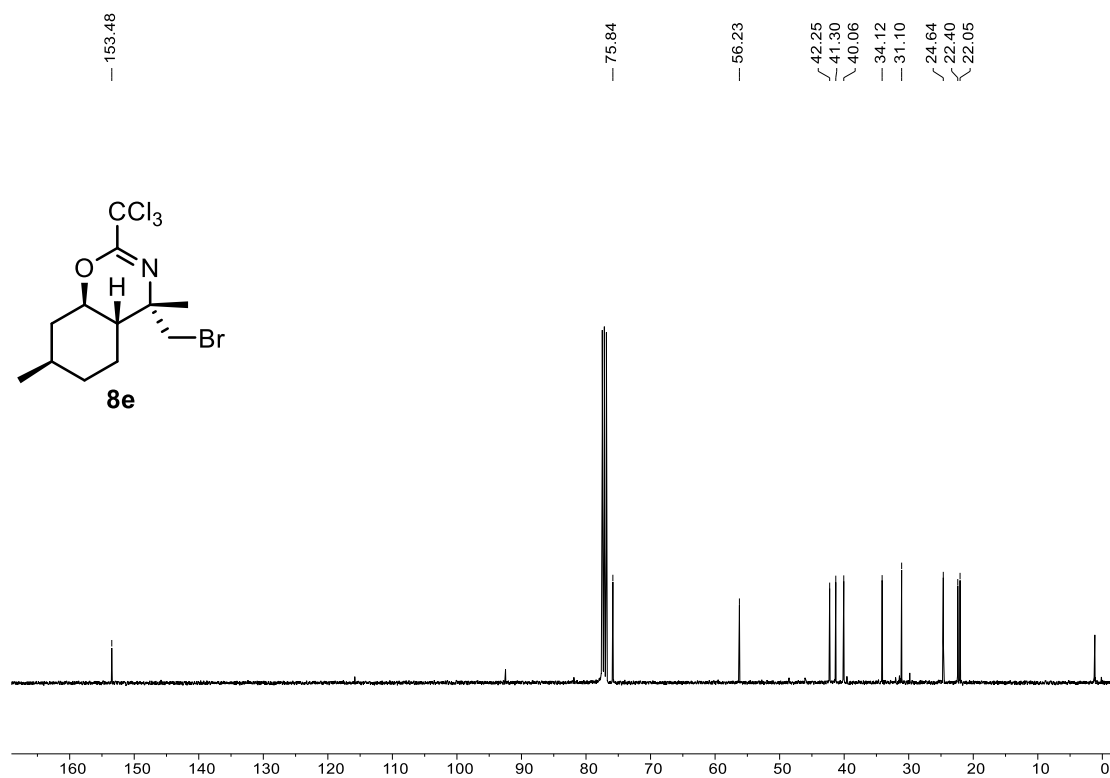

**Figure S173.**  $^{13}\text{C}$  NMR of (4*S*,4*aS*,7*R*)-4-(bromomethyl)-4,7-dimethyl-2-(trichloromethyl)-4*a*,5,6,7,8,8*a*-hexahydro-4*H*-benzo[*e*][1,3]oxazine (**8e**)

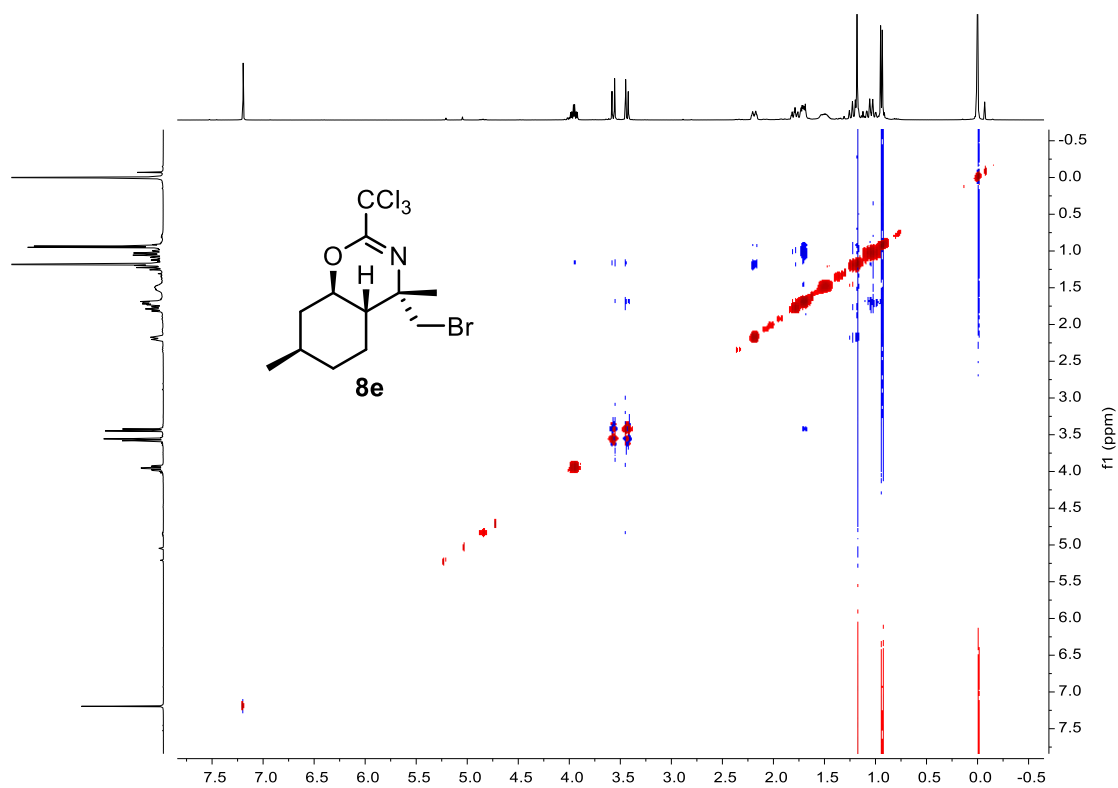

**Figure S174.**  $^1\text{H}$ - $^1\text{H}$  COSY of (4*S*,4*aS*,7*R*)-4-(bromomethyl)-4,7-dimethyl-2-(trichloromethyl)-4*a*,5,6,7,8,8*a*-hexahydro-4*H*-benzo[*e*][1,3]oxazine (**8e**)



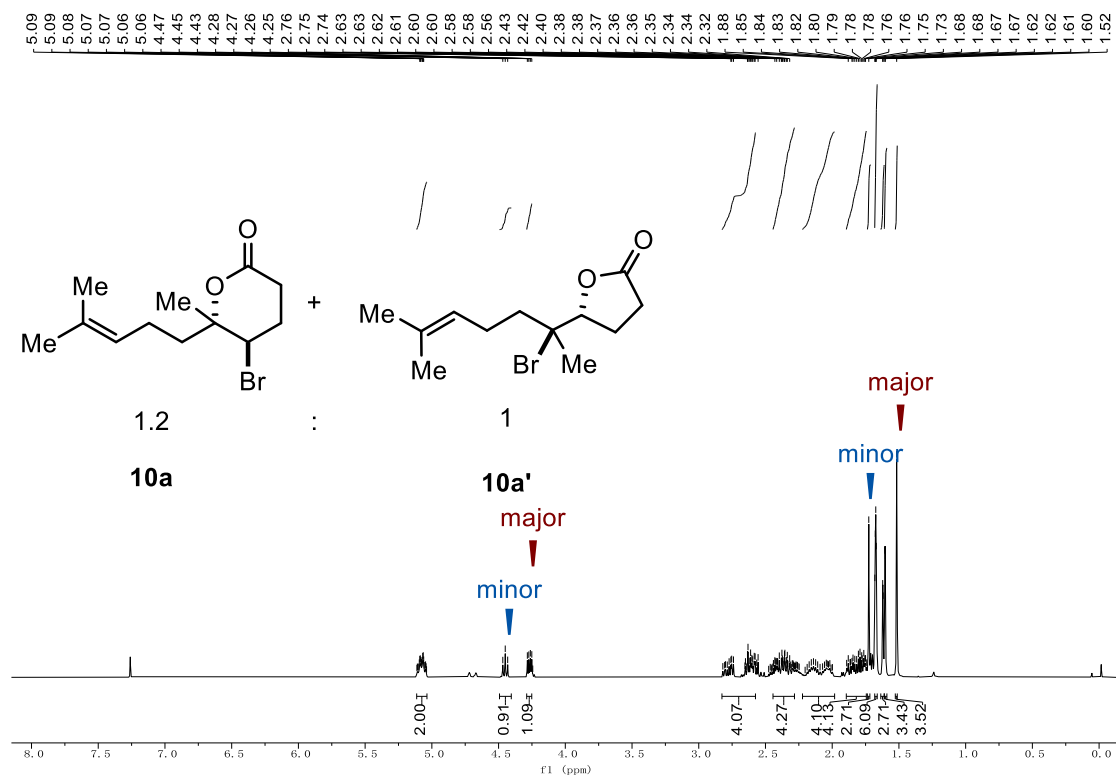

**Figure S175.** <sup>1</sup>H NMR of 5-bromo-6-methyl-6-(4-methylpent-3-en-1-yl)tetrahydro-2H-pyran-2-one (major) (**10a**) and 5-(2-bromo-6-methylhept-5-en-2-yl)dihydrofuran-2(3H)-one (minor) (**10a'**)

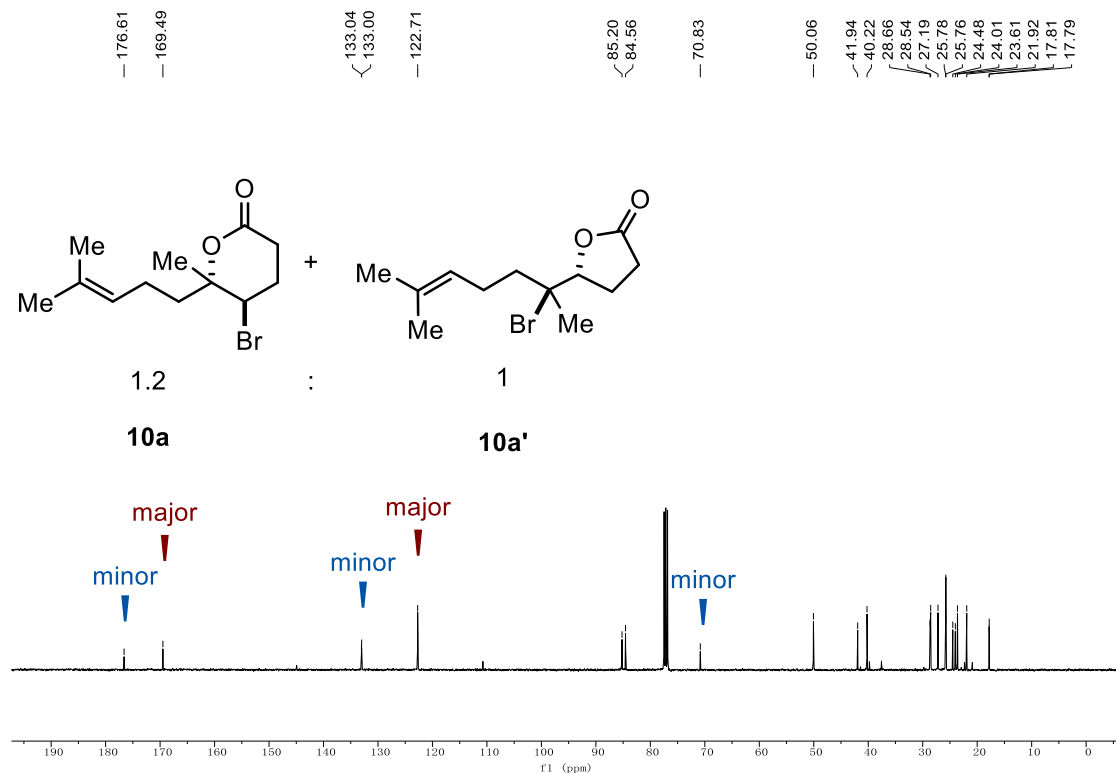

**Figure S176.** <sup>13</sup>C NMR of 5-bromo-6-methyl-6-(4-methylpent-3-en-1-yl)tetrahydro-2H-pyran-2-one (major) (**10a**) and 5-(2-bromo-6-methylhept-5-en-2-yl)dihydrofuran-2(3H)-one (minor) (**10a'**)

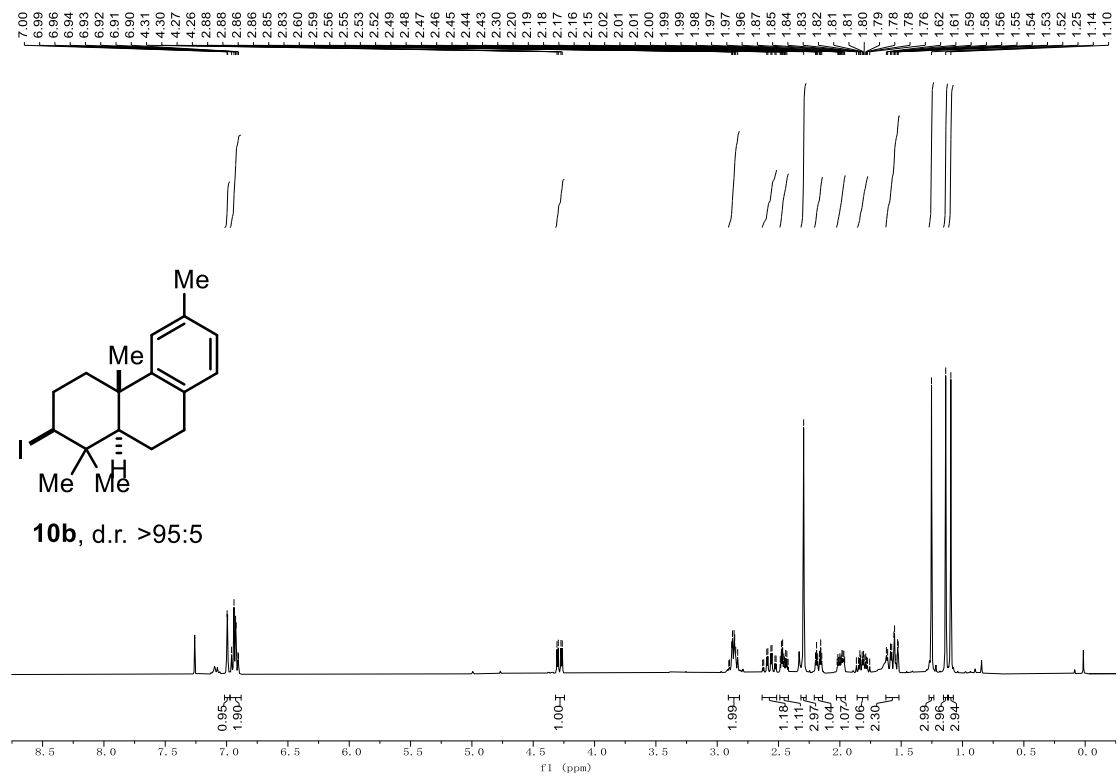

**Figure S177.**  $^1\text{H}$  NMR of 2-iodo-1,1,4a,6-tetramethyl-1,2,3,4,4a,9,10,10a-octahydrophenanthrene (**10b**)

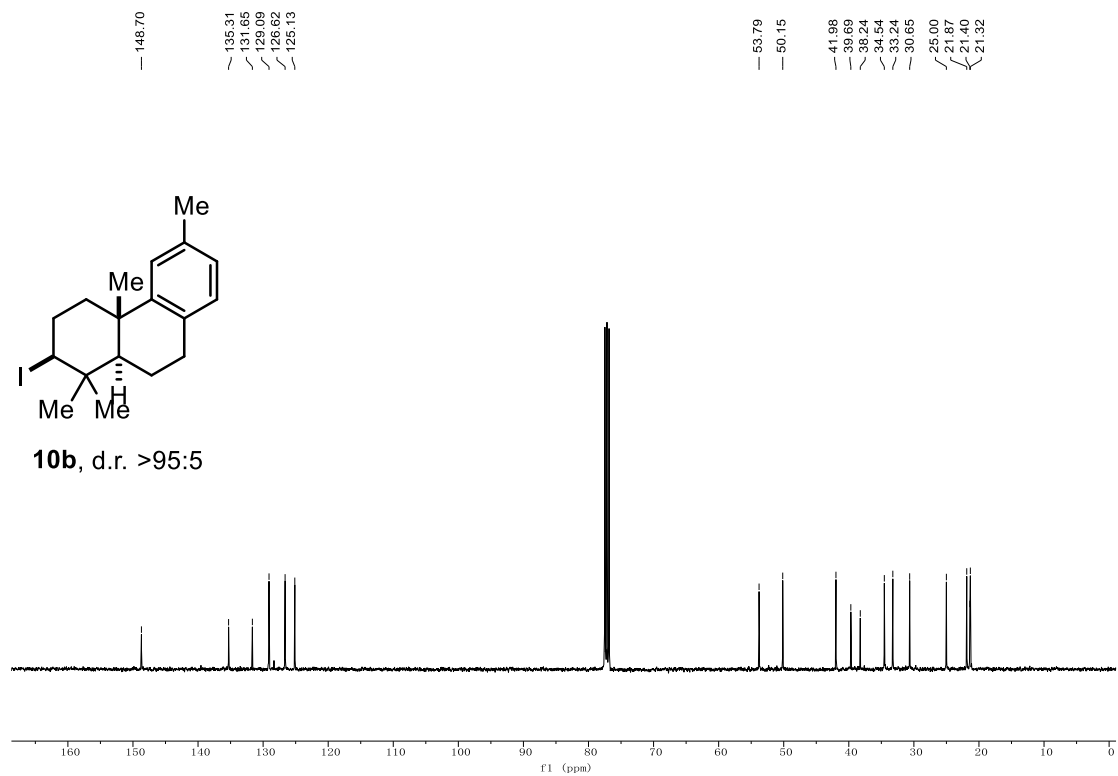

**Figure S178.**  $^{13}\text{C}$  NMR of 2-iodo-1,1,4a,6-tetramethyl-1,2,3,4,4a,9,10,10a-octahydrophenanthrene (**10b**)

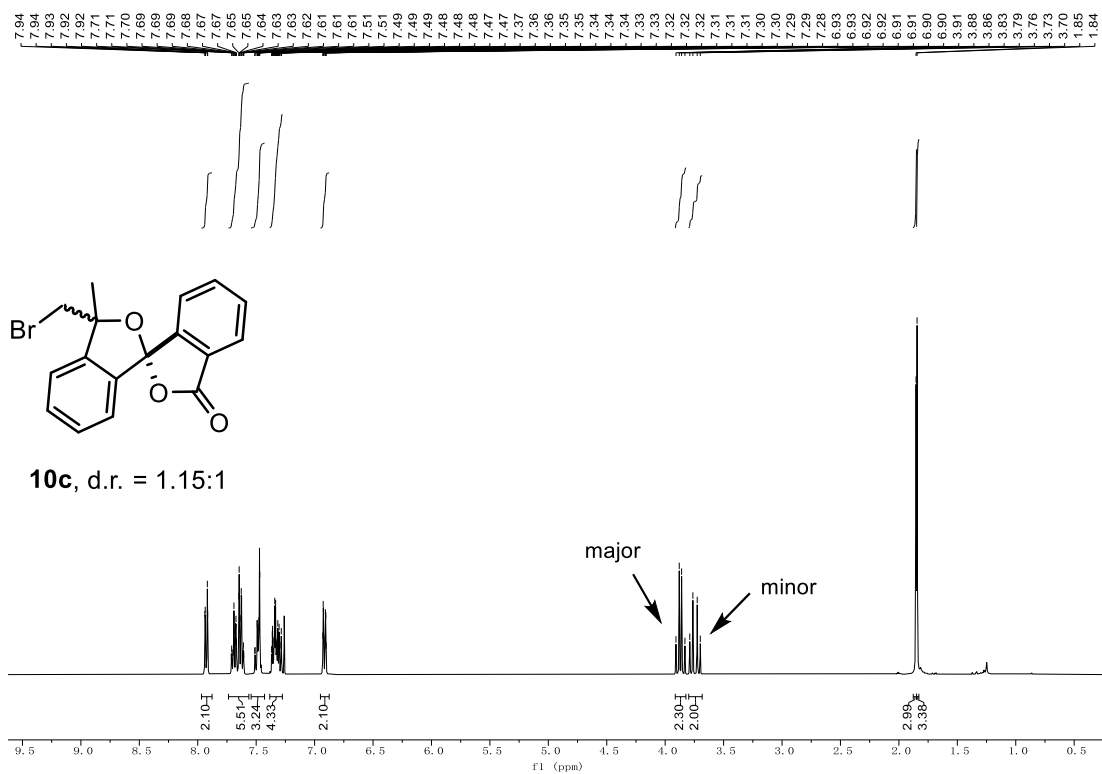

**Figure S179.**  $^1\text{H}$  NMR of 3'-(bromomethyl)-3'-methyl-3*H*,3'*H*-1,1'-spirobi[isobenzofuran]-3-one (**10c**, **10c'**)

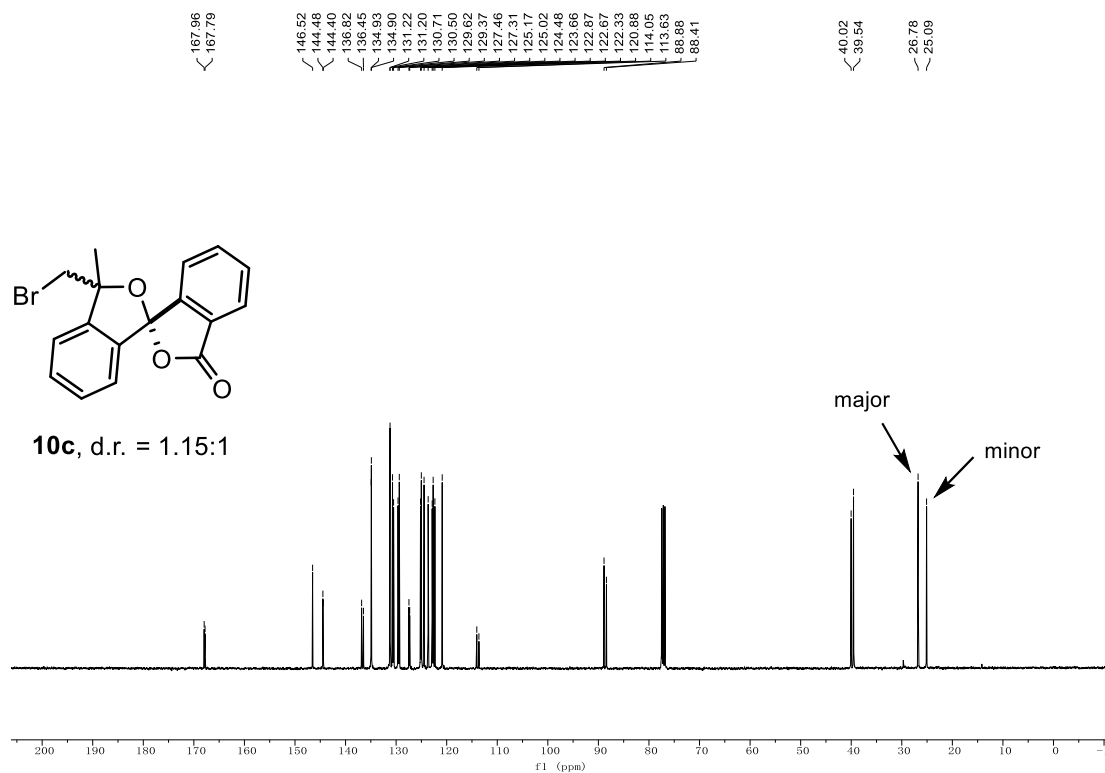

**Figure S180.**  $^{13}\text{C}$  NMR of 3'-(bromomethyl)-3'-methyl-3*H*,3'*H*-1,1'-spirobi[isobenzofuran]-3-one (**10c**, **10c'**)

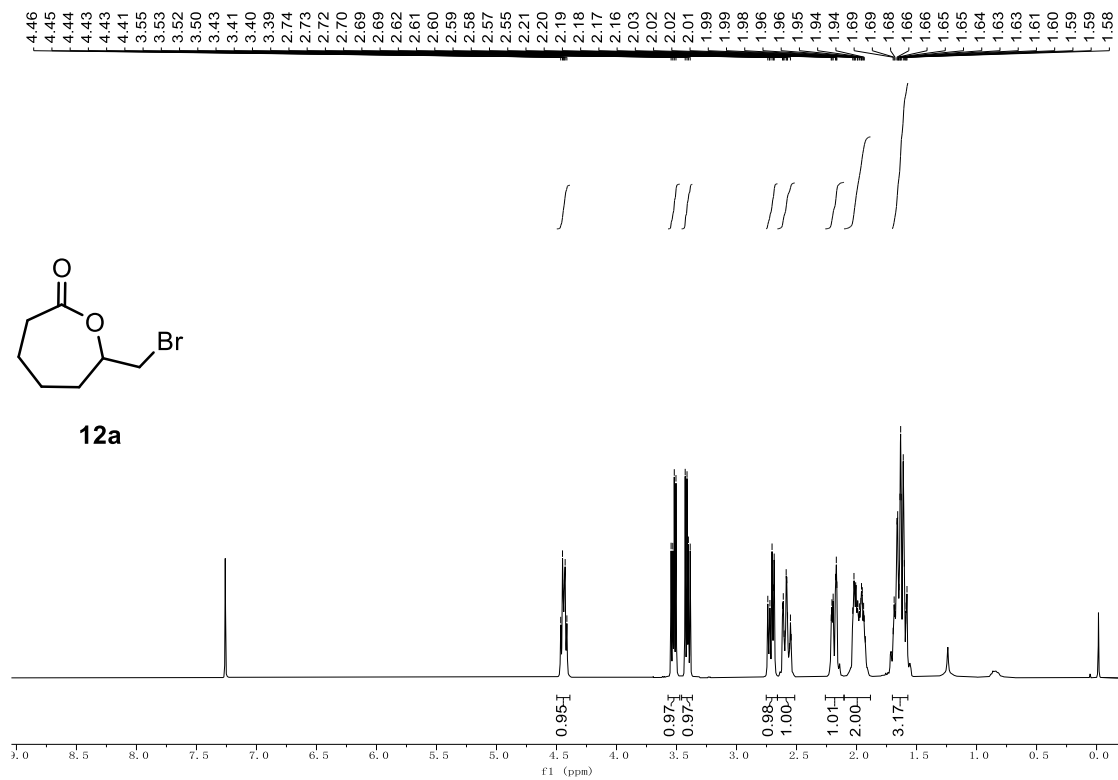

**Figure S181.**  $^1\text{H}$  NMR of 7-(bromomethyl)oxepan-2-one (**12a**)

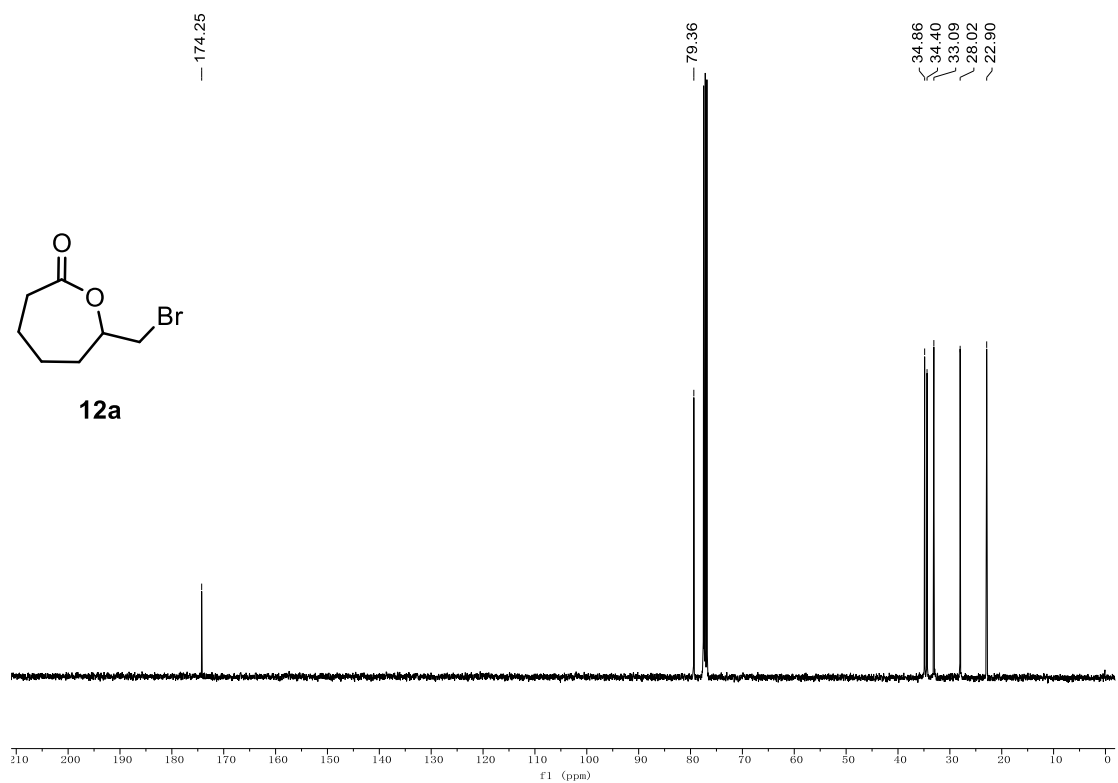

**Figure S182.**  $^{13}\text{C}$  NMR of 7-(bromomethyl)oxepan-2-one (**12a**)

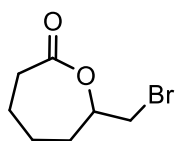

**12a**

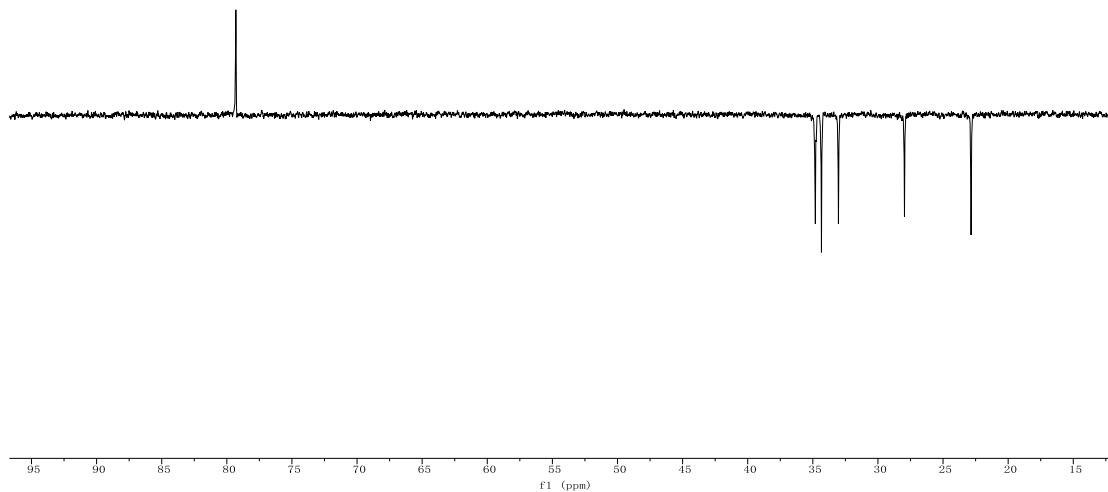

**Figure S183.** DEPT 135 of 7-(bromomethyl)oxepan-2-one (**12a**)

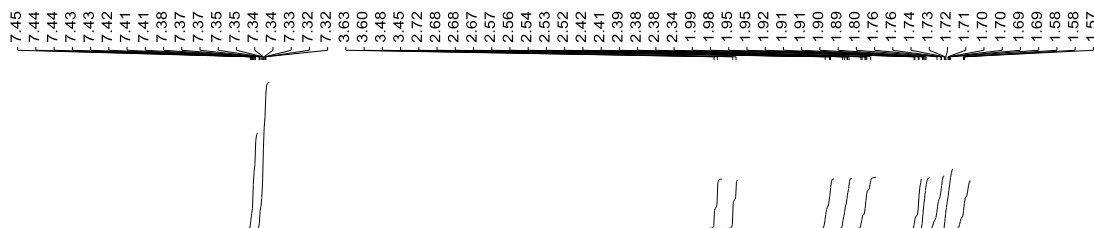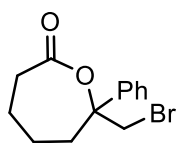

**12b**

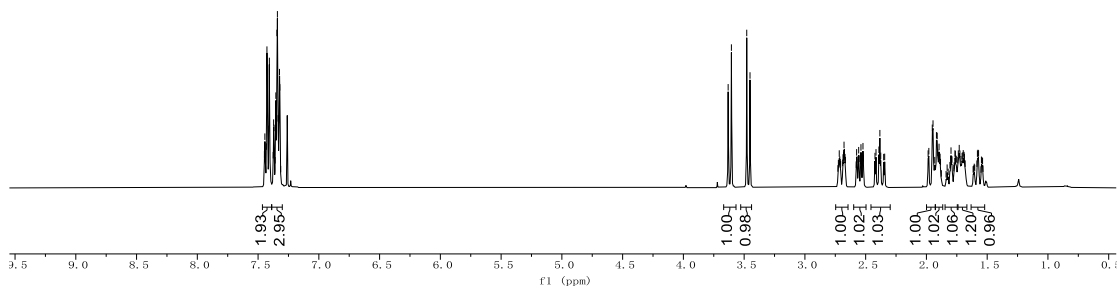

**Figure S184.**  $^1\text{H}$  NMR of 7-(bromomethyl)-7-phenyloxepan-2-one (**12b**)

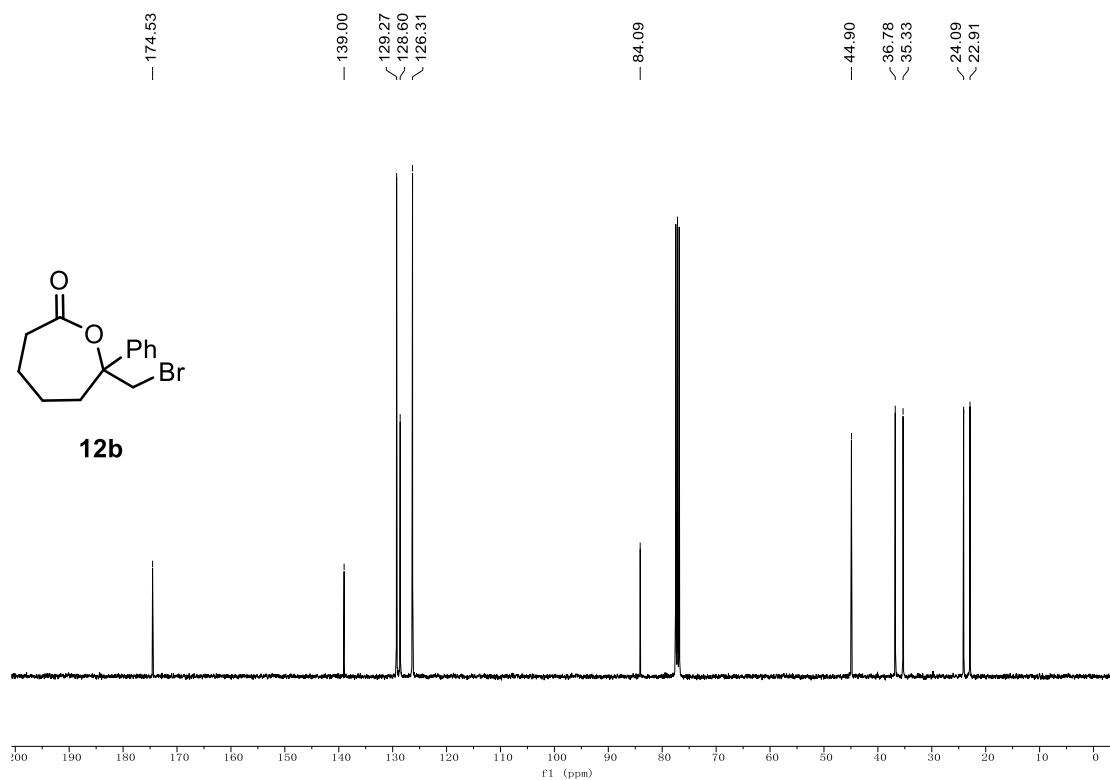

Figure S185. <sup>13</sup>C NMR of 7-(bromomethyl)-7-phenyloxepan-2-one (**12b**)

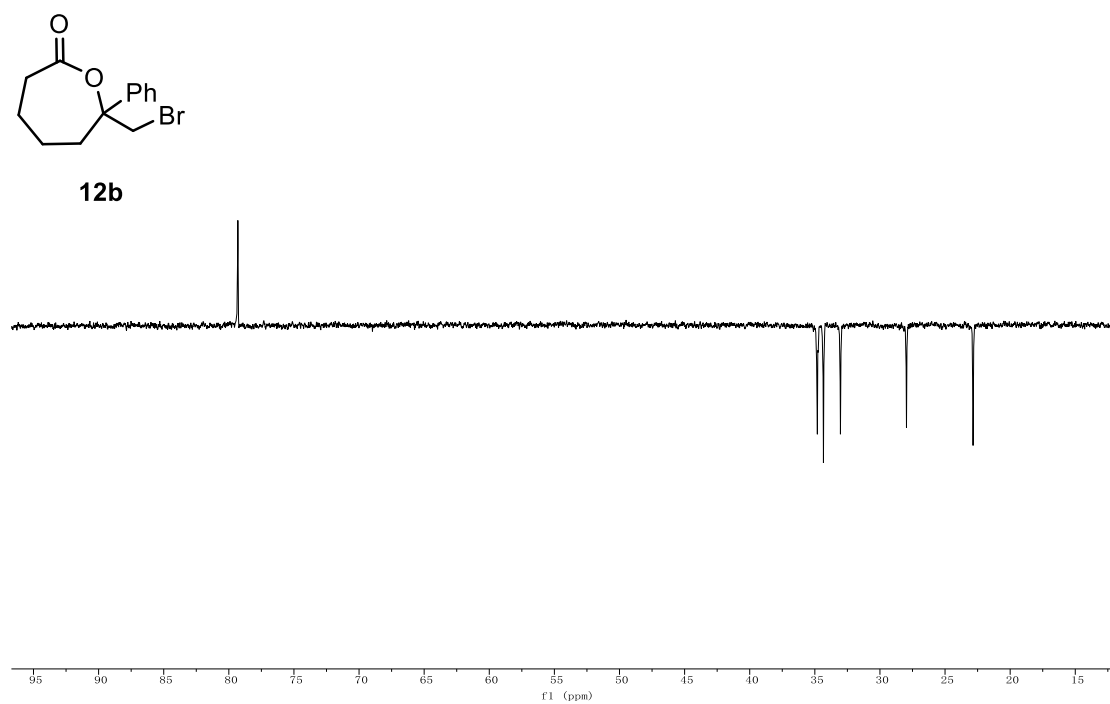

Figure S186. DEPT 135 of 7-(bromomethyl)-7-phenyloxepan-2-one (**12b**)

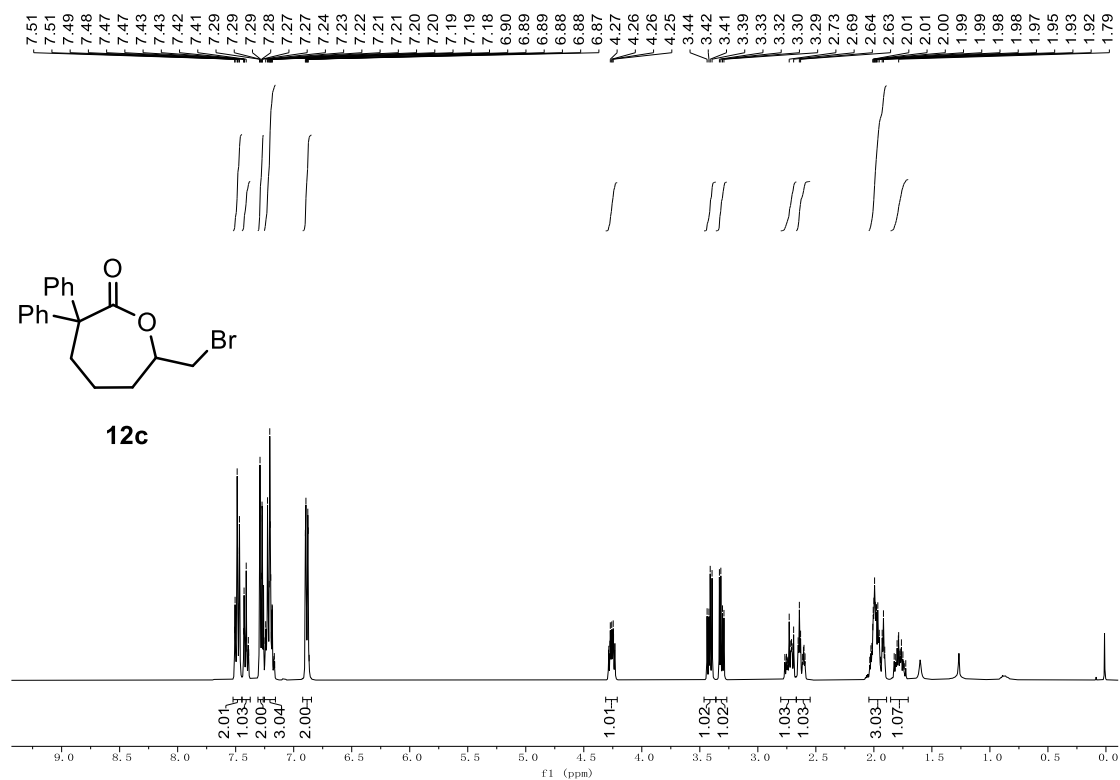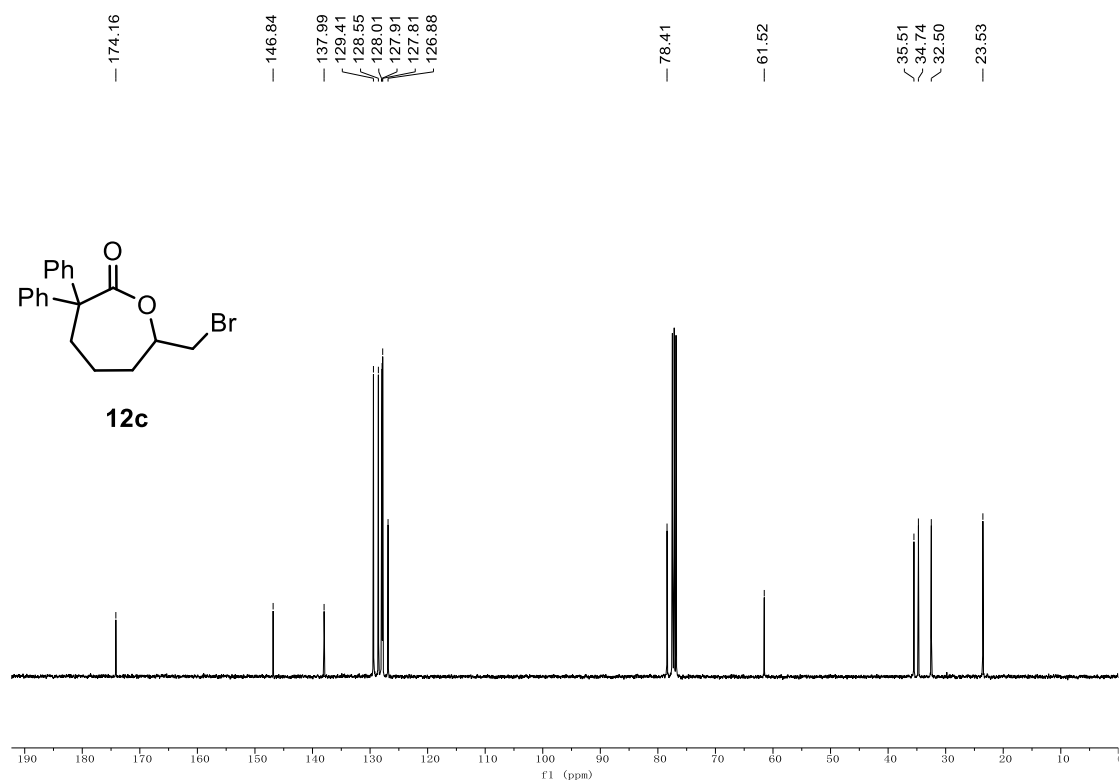

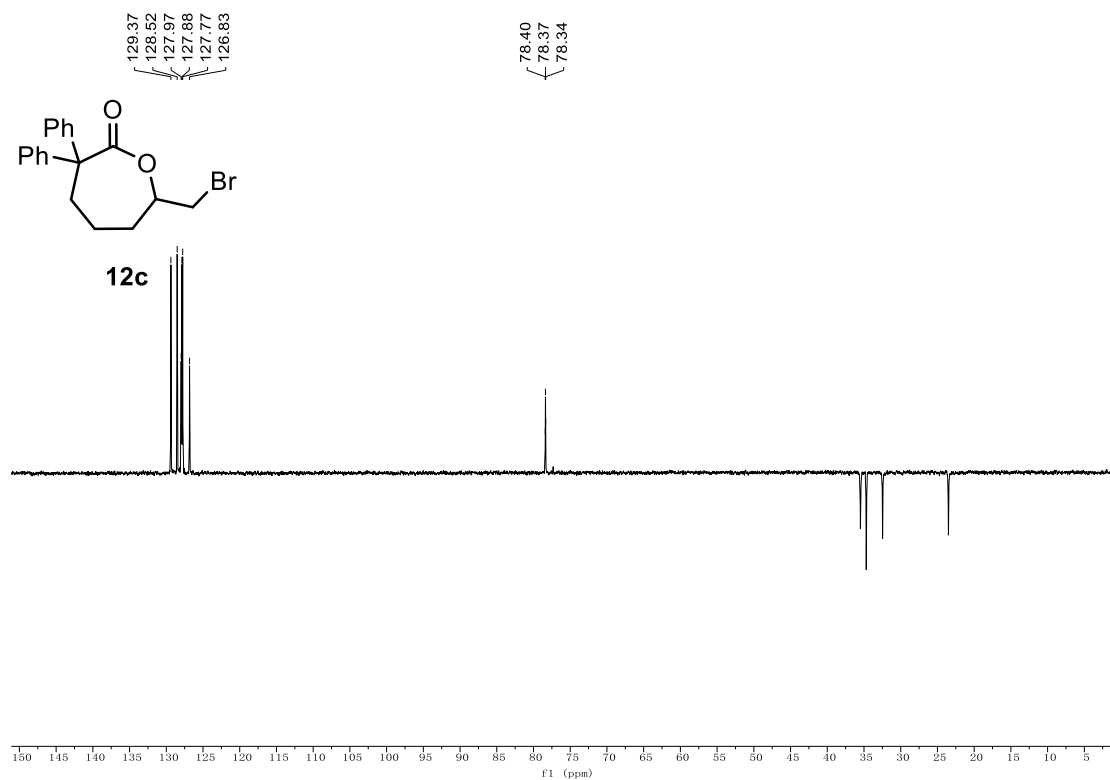

Figure S189. DEPT 135 of 7-(bromomethyl)-3,3-diphenyloxepan-2-one (12c)

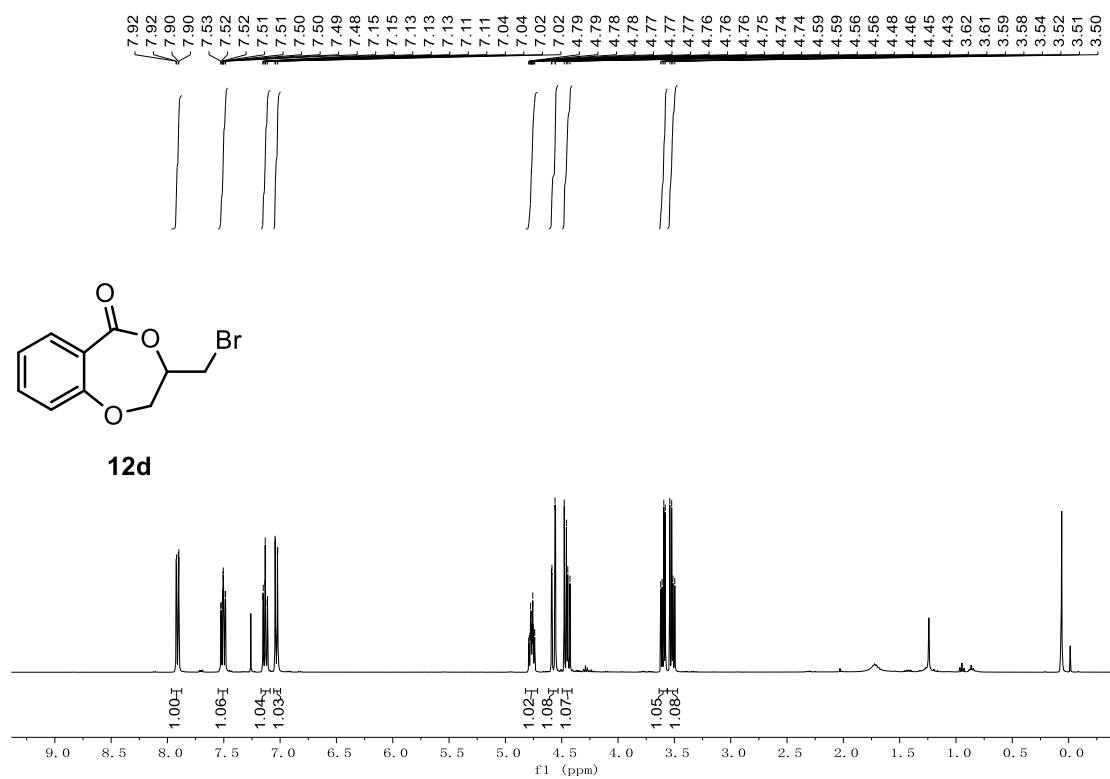

Figure S190. <sup>1</sup>H NMR of 3-(bromomethyl)-2,3-dihydro-5H-benzo[e][1,4]dioxepin-5-one (12d)



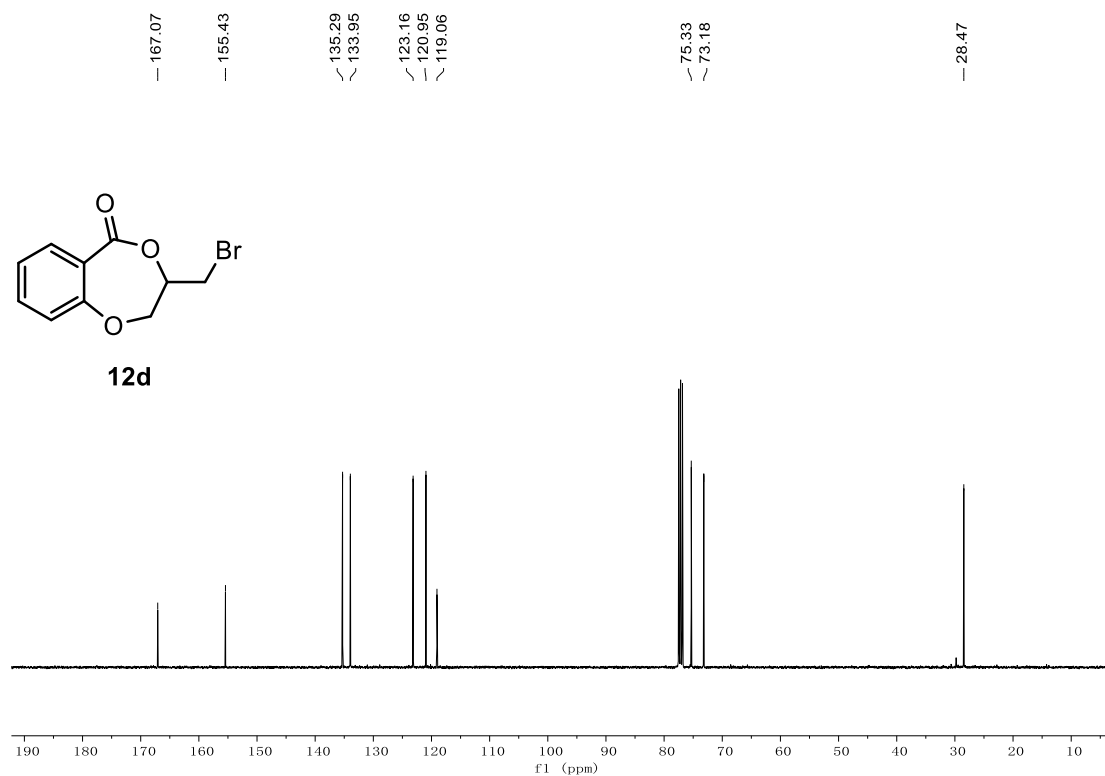

**Figure S191.**  $^{13}\text{C}$  NMR of 3-(bromomethyl)-2,3-dihydro-5*H*-benzo[*e*][1,4]dioxepin-5-one (**12d**)

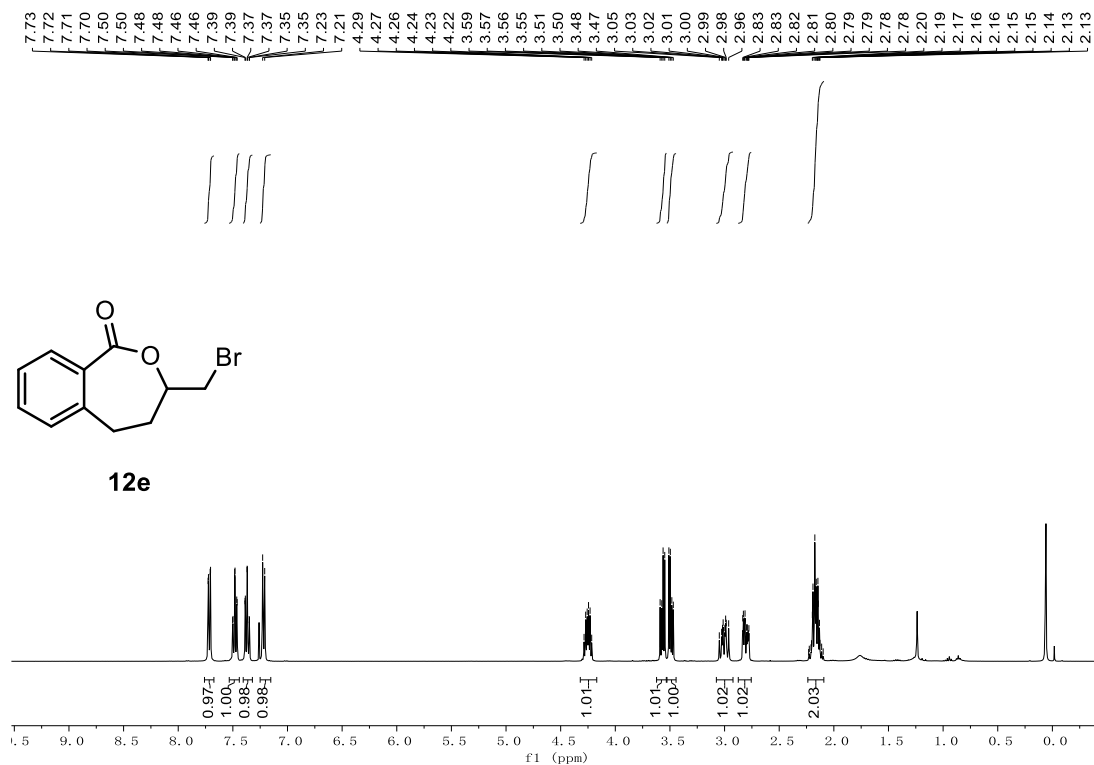

**Figure S192.**  $^1\text{H}$  NMR of 3-(bromomethyl)-4,5-dihydrobenzo[*c*]oxepin-1(3*H*)-one (**12e**)

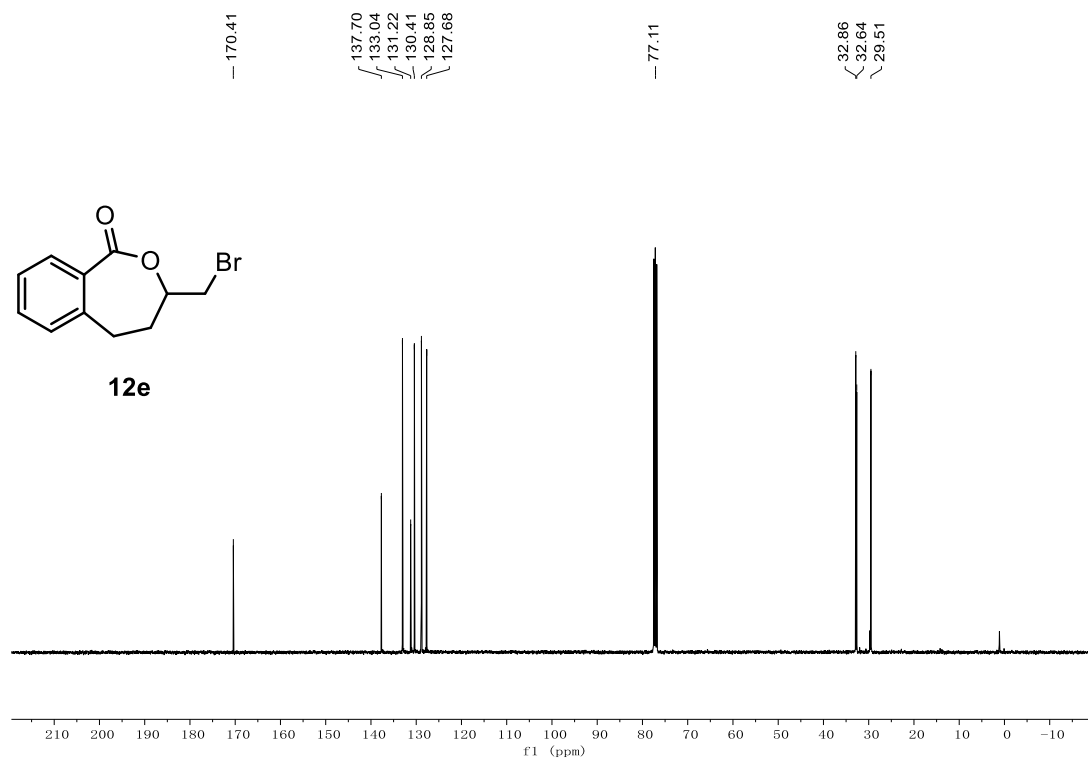

**Figure S193.**  $^{13}\text{C}$  NMR of 3-(bromomethyl)-4,5-dihydrobenzo[*c*]oxepin-1(3*H*)-one (**12e**)

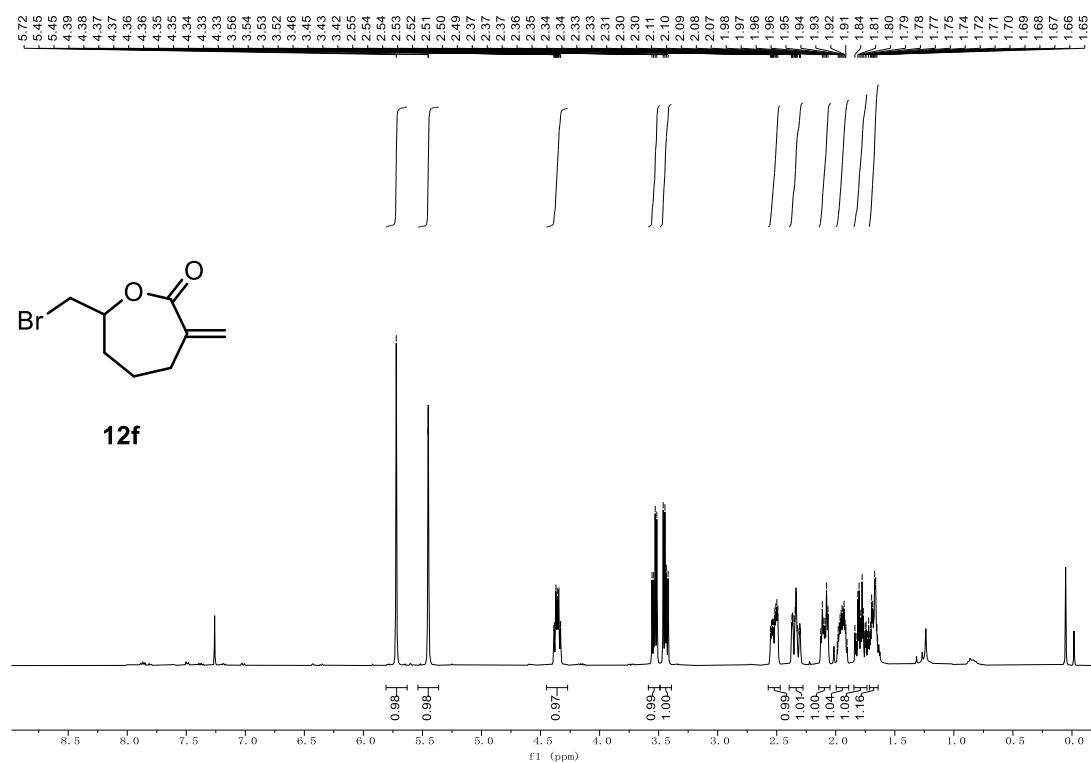

**Figure S194.**  $^1\text{H}$  NMR of 7-(bromomethyl)-3,3-diphenyloxepan-2-one (**12f**)

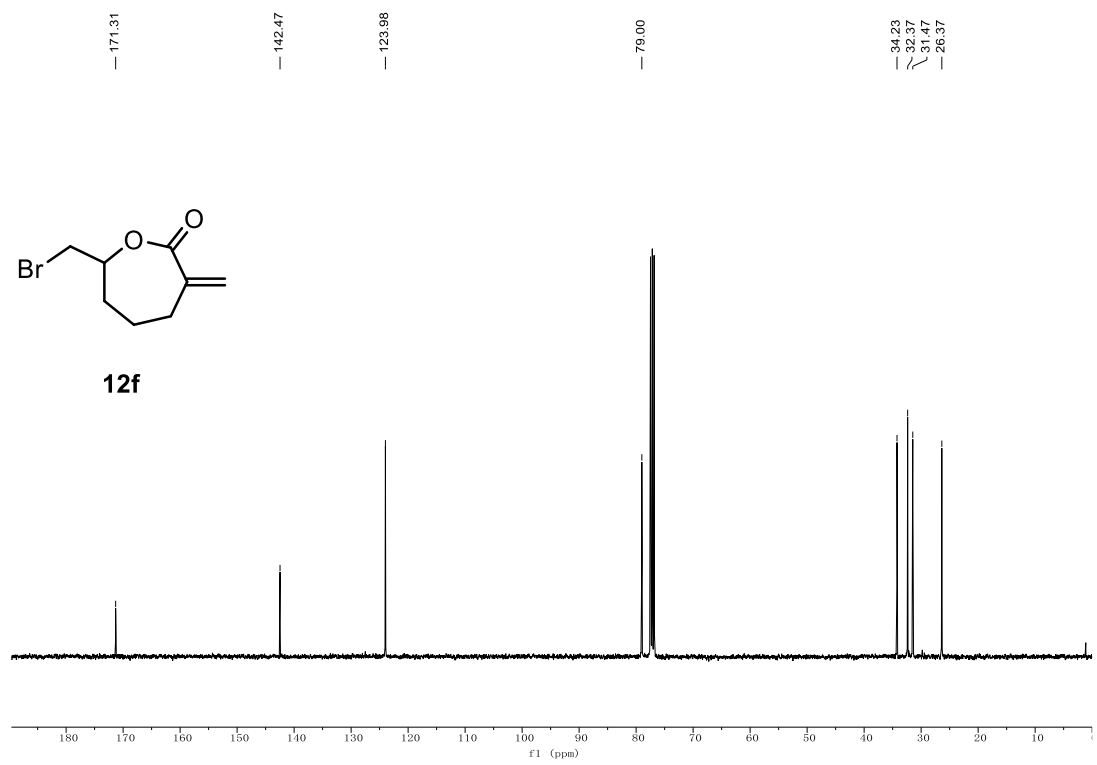

Figure S195. <sup>13</sup>C NMR of 7-(bromomethyl)-3,3-diphenyloxepan-2-one (12f)

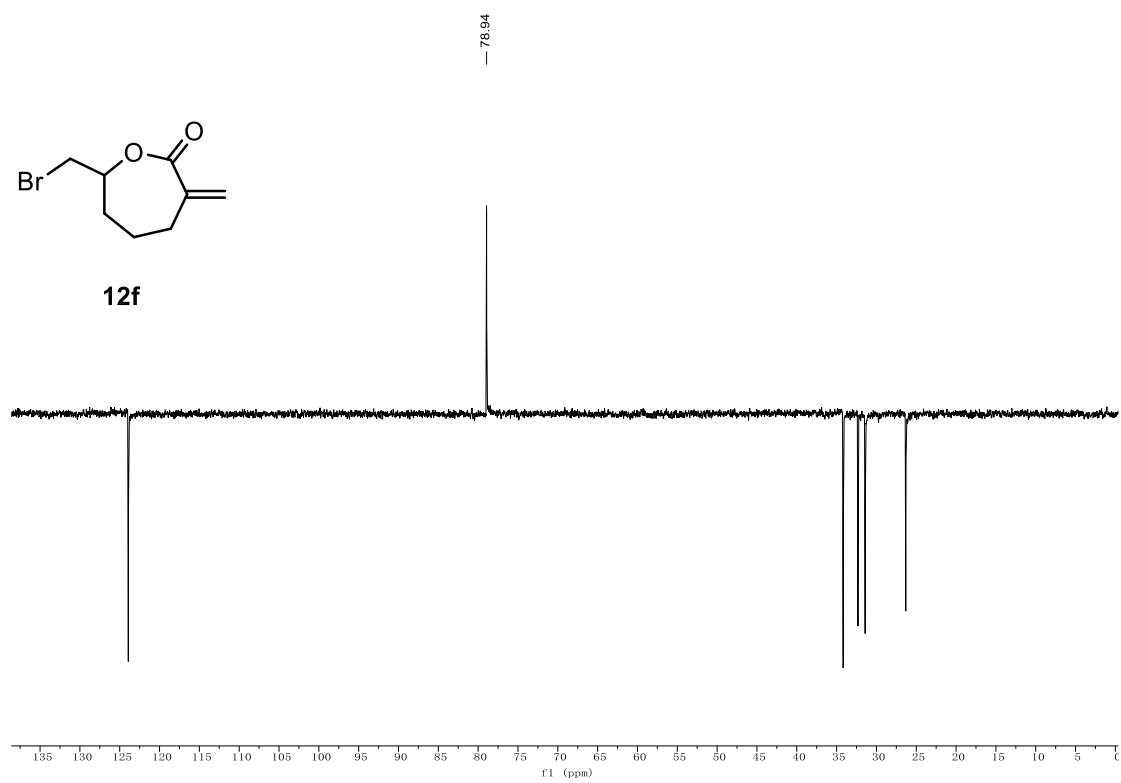

Figure S196. DEPT 135 of 7-(bromomethyl)-3,3-diphenyloxepan-2-one (12f)

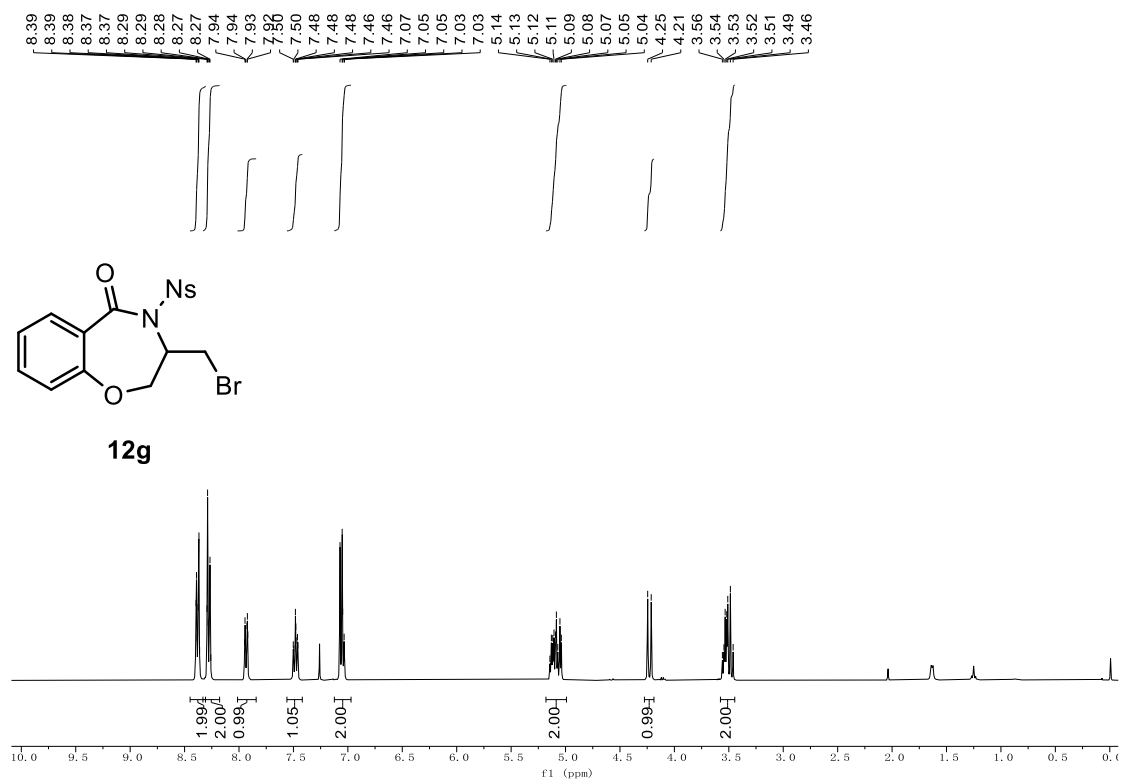

**Figure S197.**  $^1\text{H}$  NMR of 3-(bromomethyl)-4-((4-nitrophenyl)sulfonyl)-3,4-dihydrobenzo[*f*][1,4]oxazepin-5(2*H*)-one (**12g**)

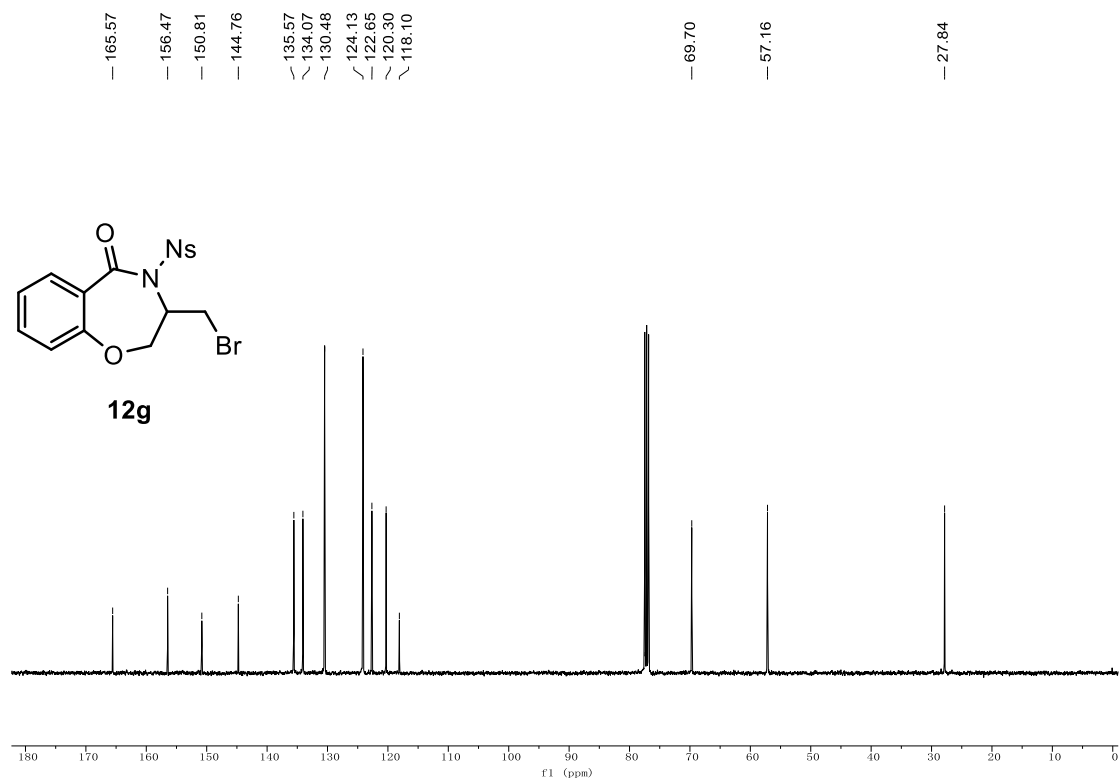

**Figure S198.**  $^{13}\text{C}$  NMR of 3-(bromomethyl)-4-((4-nitrophenyl)sulfonyl)-3,4-dihydrobenzo[*f*][1,4]oxazepin-5(2*H*)-one (**12g**)

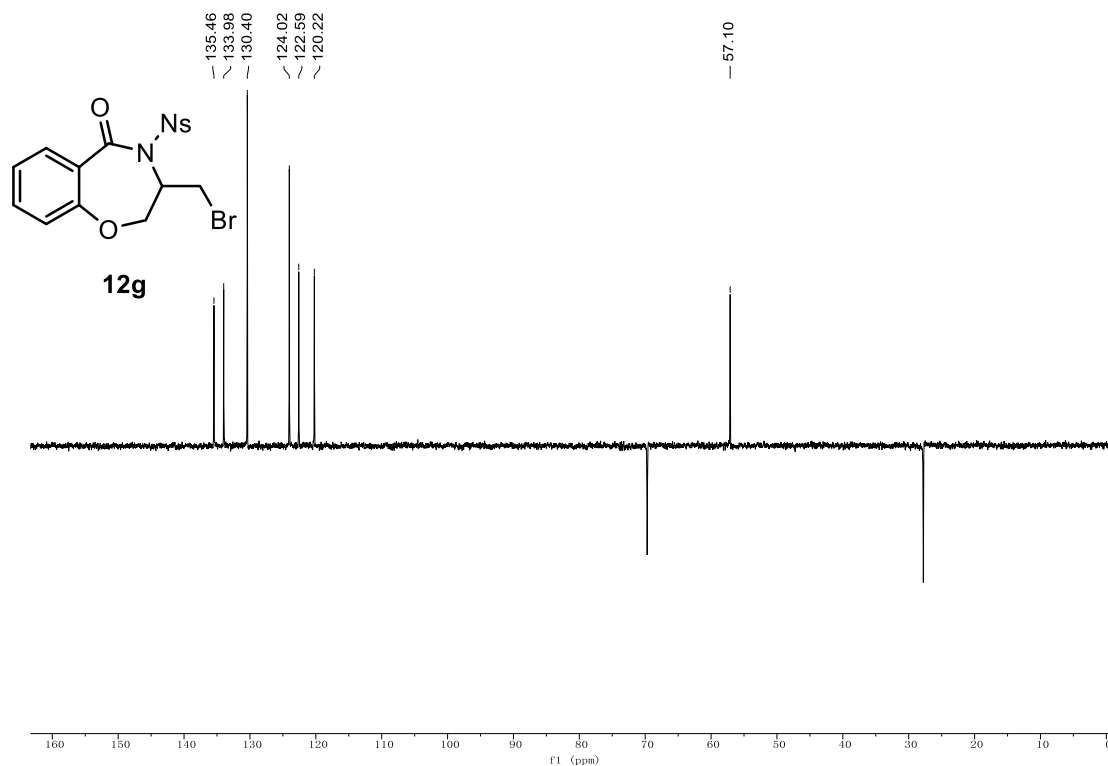

**Figure S199.** DEPT 135 of 3-(bromomethyl)-4-((4-nitrophenyl)sulfonyl)-3,4-dihydrobenzo[f][1,4]oxazepin-5(2H)-one (**12g**)

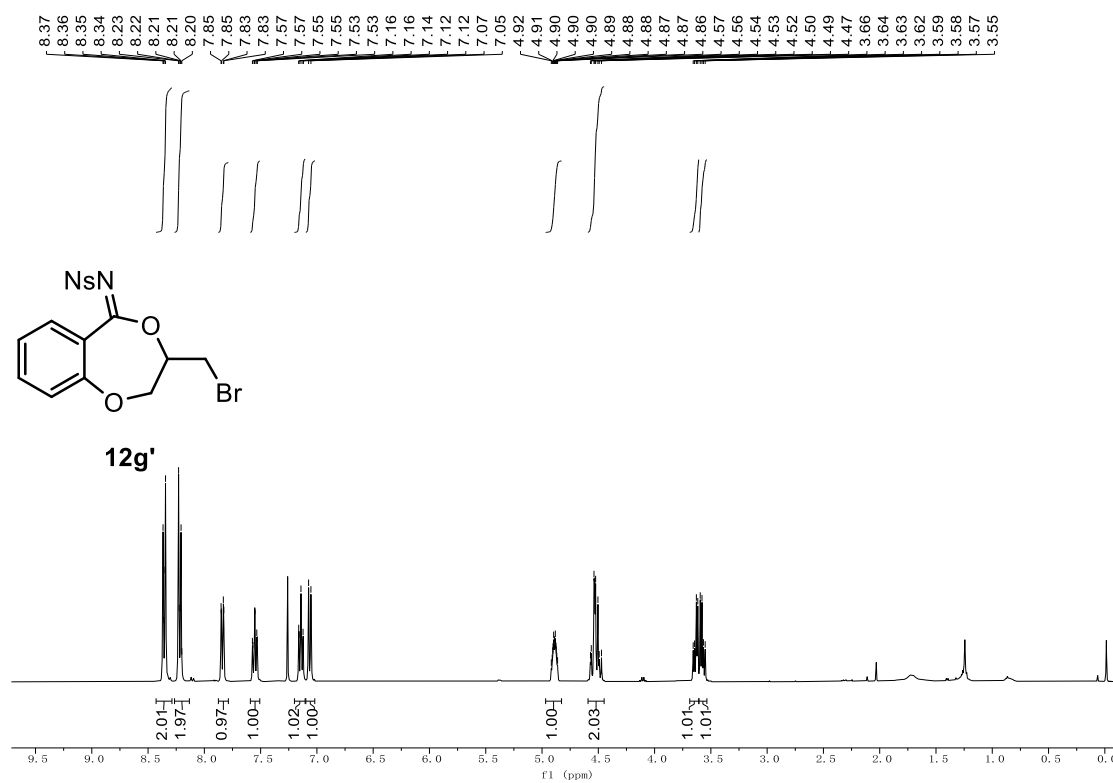

**Figure S200.** <sup>1</sup>H NMR of (Z)-N-(3-(bromomethyl)-2,3-dihydro-5H-benzo[e][1,4]dioxepin-5-ylidene)-4-nitrobenzenesulfonamide (**12g'**)

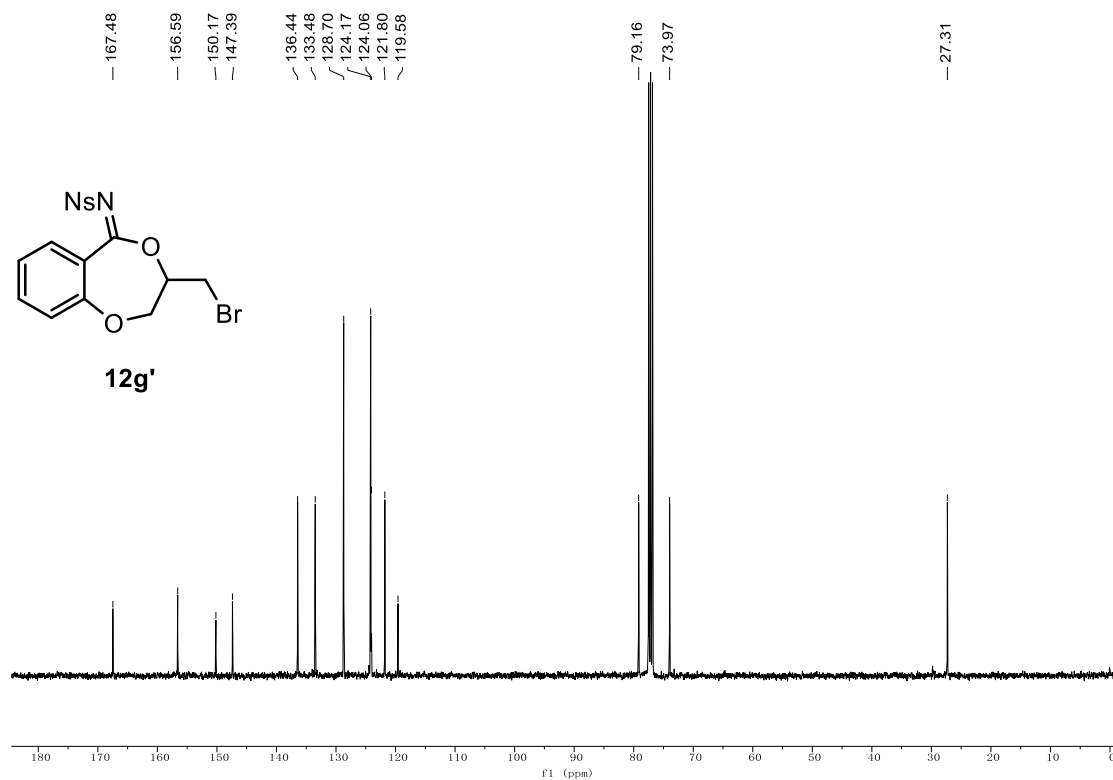

**Figure S201.**  $^{13}\text{C}$  NMR of (Z)-N-(3-(bromomethyl)-2,3-dihydro-5H-benzo[e][1,4]dioxepin-5-ylidene)-4-nitrobenzenesulfonamide (**12g'**)

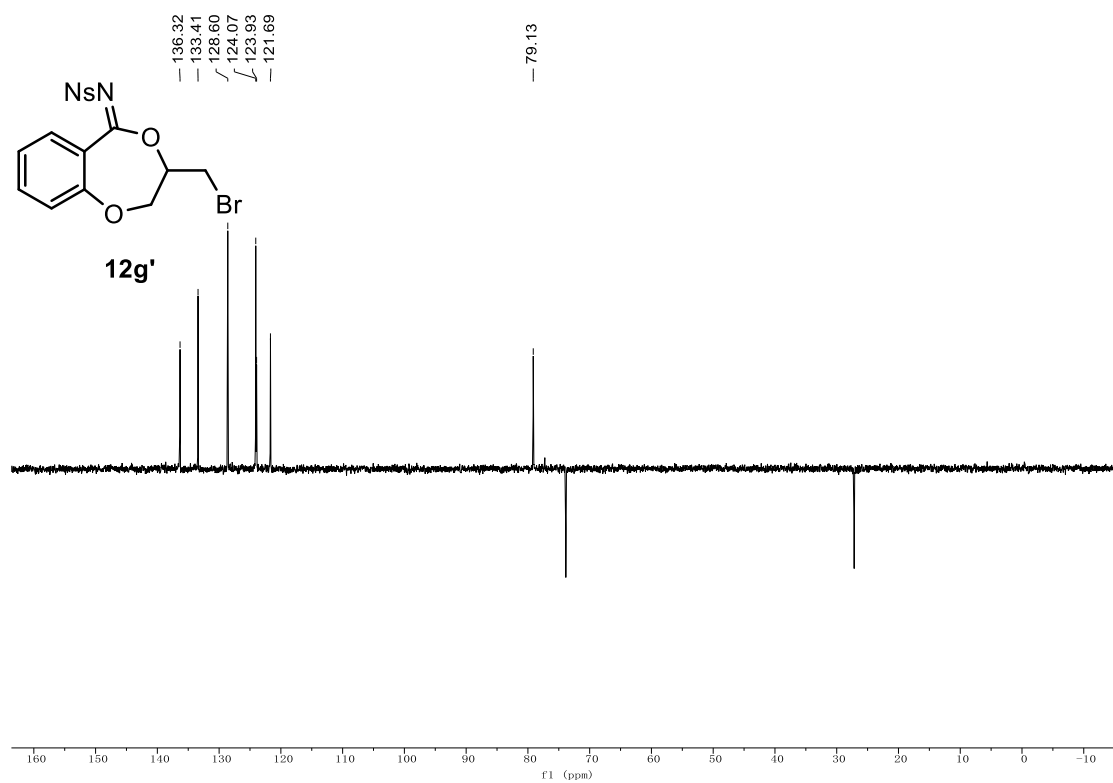

**Figure S202.** DEPT 135 of (Z)-N-(3-(bromomethyl)-2,3-dihydro-5H-benzo[e][1,4]dioxepin-5-ylidene)-4-nitrobenzenesulfonamide (**12g'**)

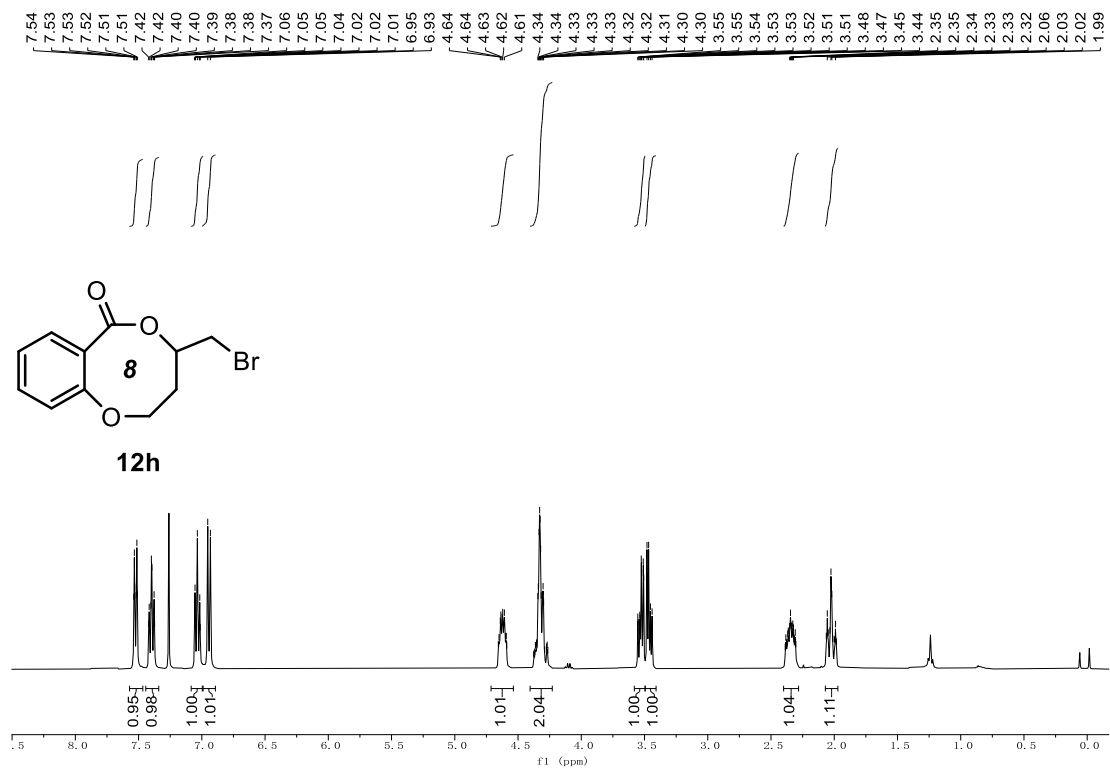

**Figure S203.**  $^1\text{H}$  NMR of 4-(bromomethyl)-3,4-dihydro-2H,6H-benzo[b][1,5]dioxocin-6-one (12h)

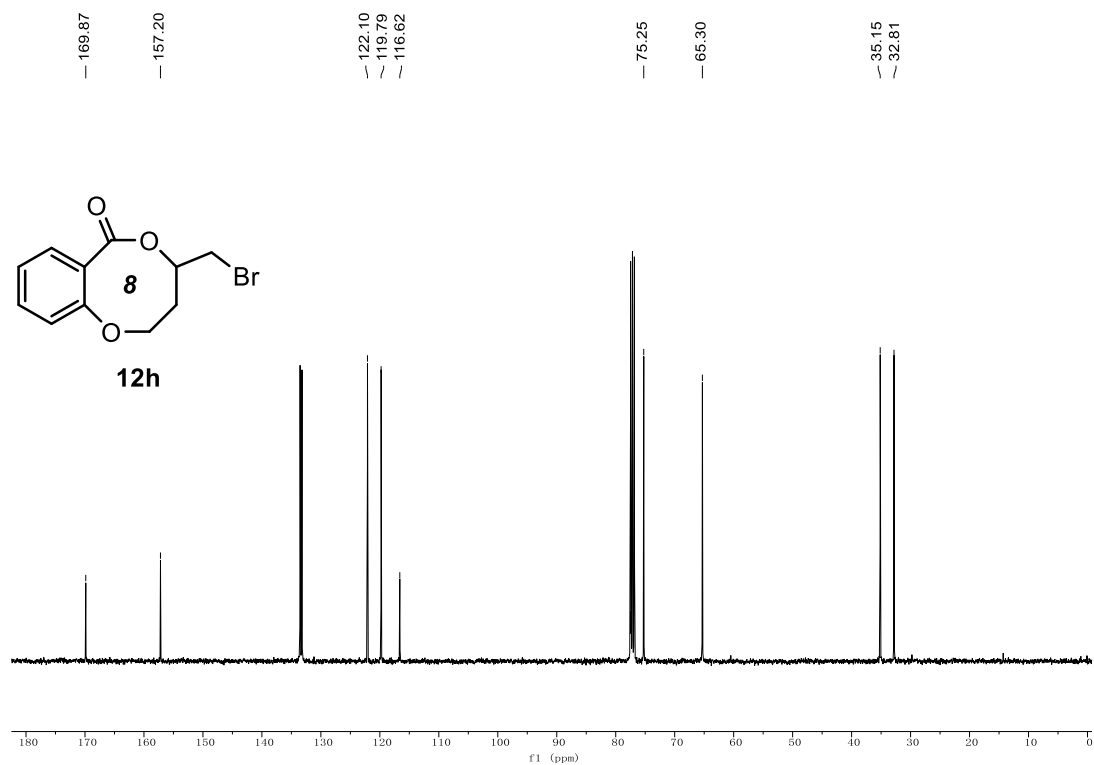

**Figure S204.**  $^{13}\text{C}$  NMR of 4-(bromomethyl)-3,4-dihydro-2H,6H-benzo[b][1,5]dioxocin-6-one (12h)

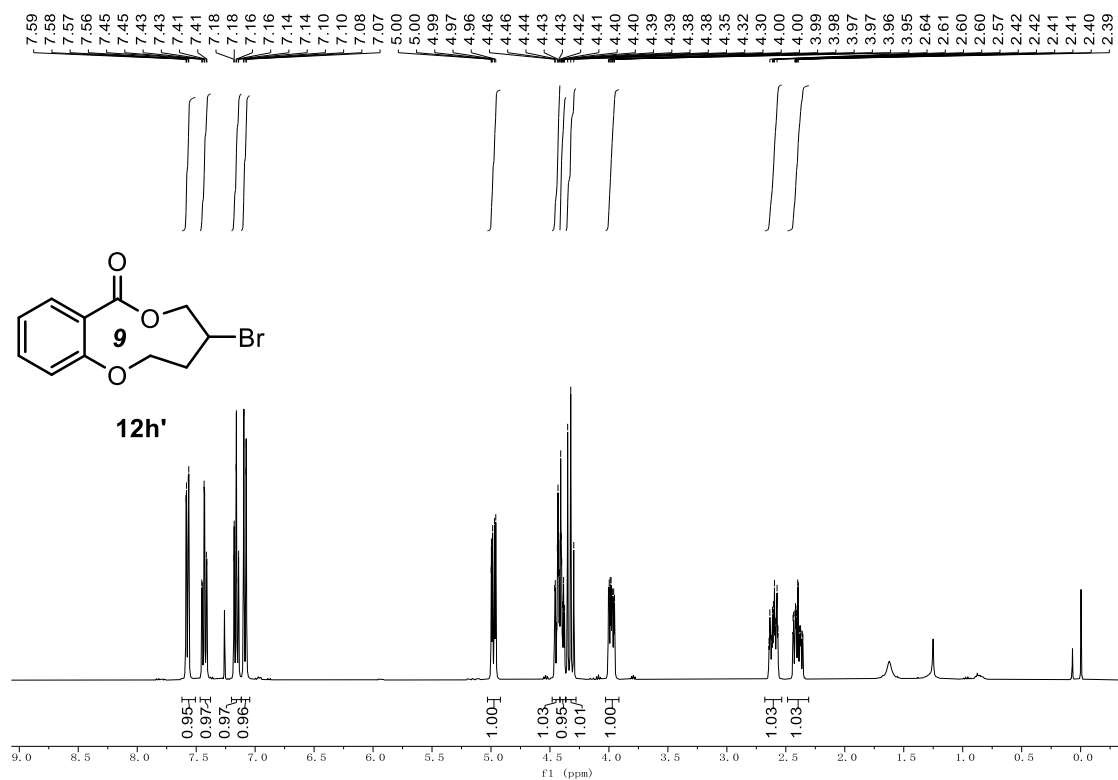

Figure S205.  $^1\text{H}$  NMR of 4-bromo-2,3,4,5-tetrahydro-7H-benzo[*b*][1,5]dioxin-7-one (**12h'**)

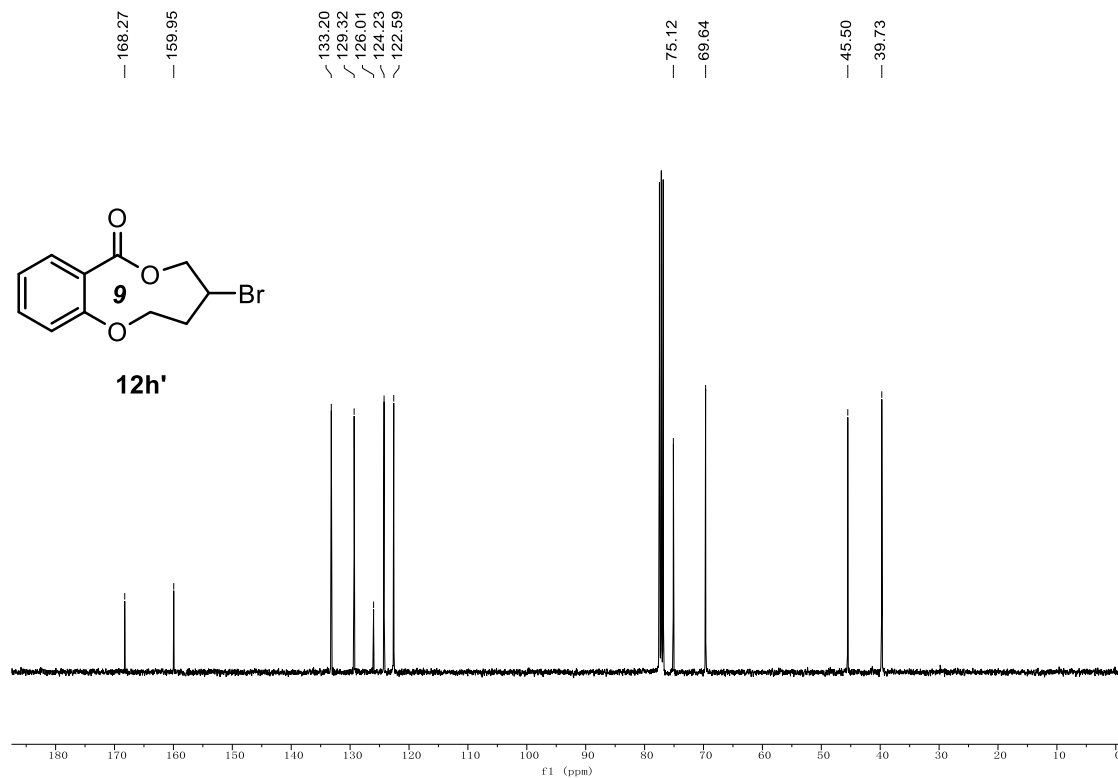

Figure S206.  $^{13}\text{C}$  NMR of 4-bromo-2,3,4,5-tetrahydro-7H-benzo[*b*][1,5]dioxin-7-one (**12h'**)



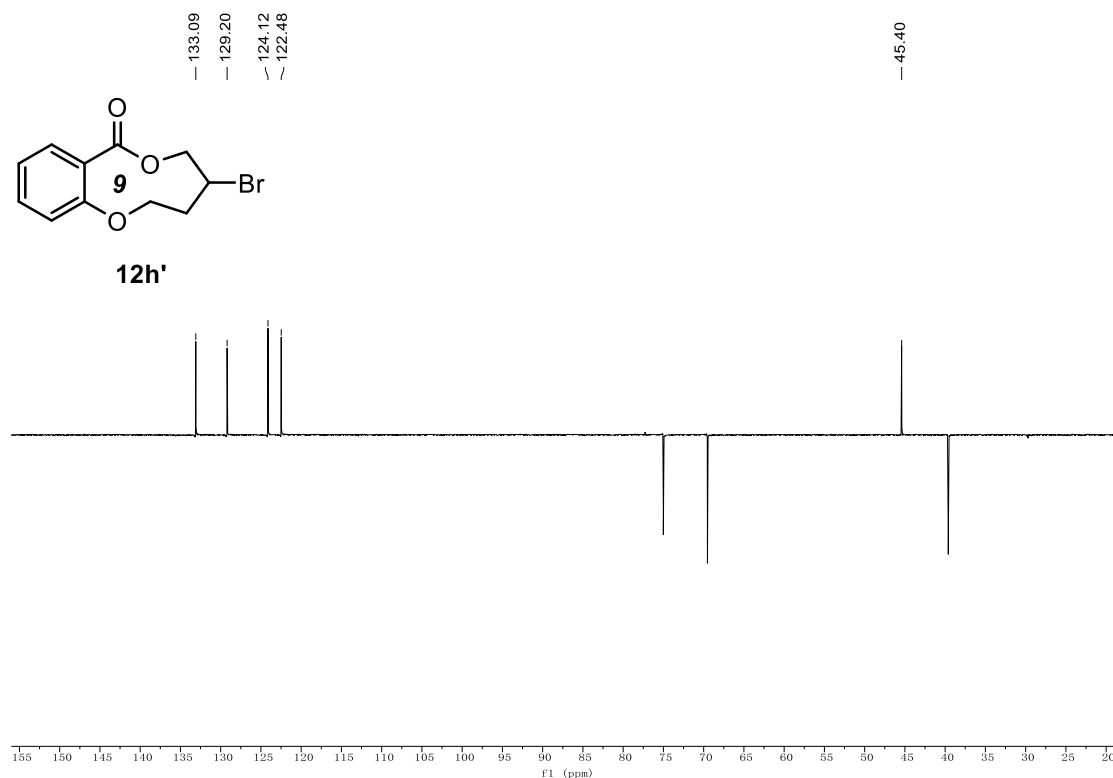

Figure S207. DEPT 135 of 4-bromo-2,3,4,5-tetrahydro-7H-benzo[*b*][1,5]dioxonin-7-one (**12h'**)

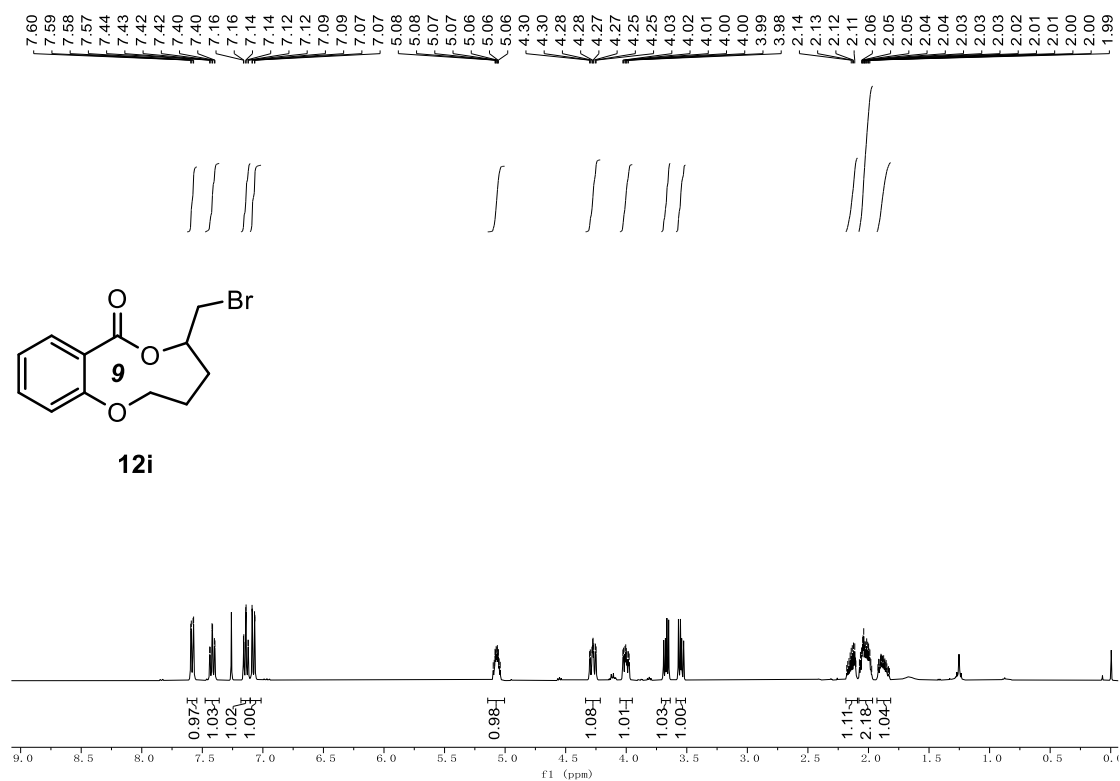

Figure S208. <sup>1</sup>H NMR of 5-(bromomethyl)-2,3,4,5-tetrahydro-7H-benzo[*b*][1,5]dioxonin-7-one (**12i**)

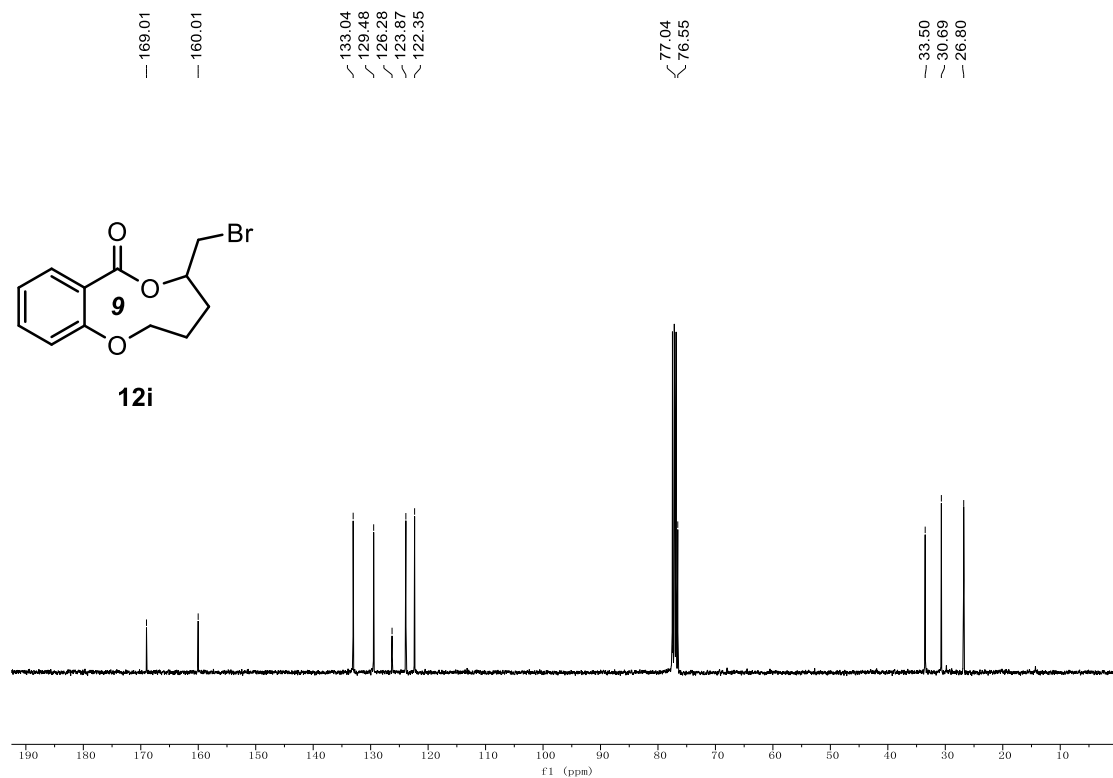

**Figure S209.** <sup>13</sup>C NMR of 5-(bromomethyl)-2,3,4,5-tetrahydro-7H-benzo[*b*][1,5]dioxonin-7-one (**12i**)

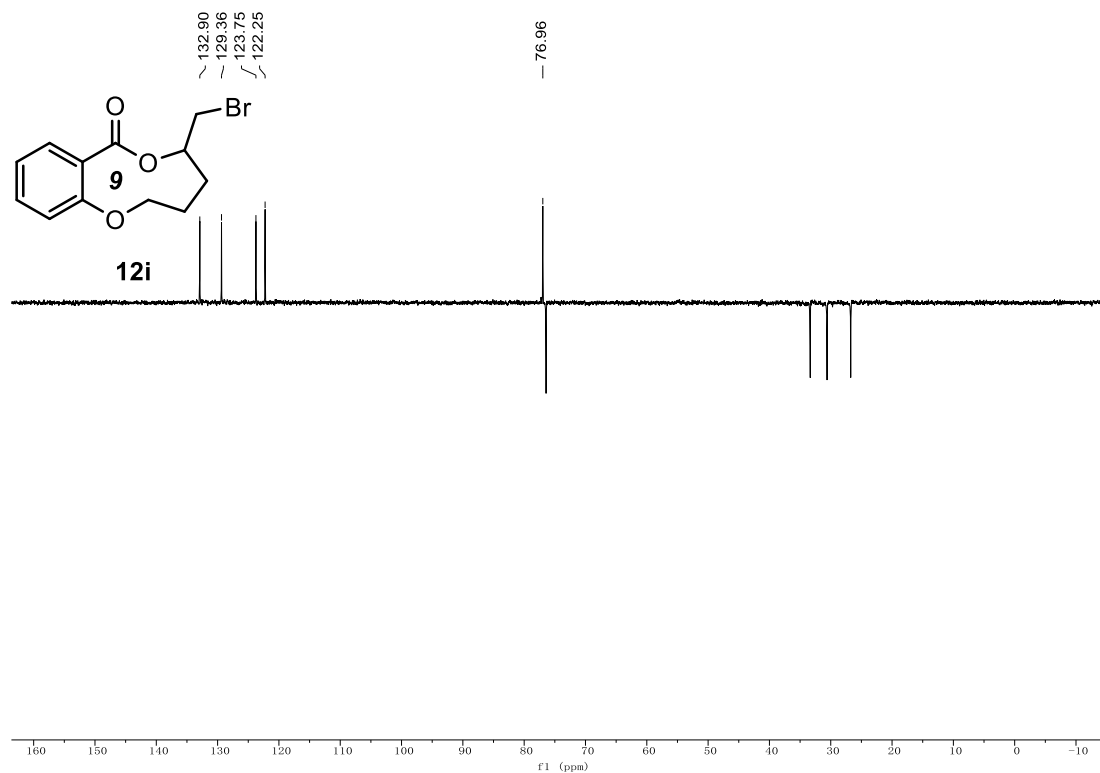

**Figure S210.** DEPT 135 of 5-(bromomethyl)-2,3,4,5-tetrahydro-7H-benzo[*b*][1,5]dioxonin-7-one (**12i**)

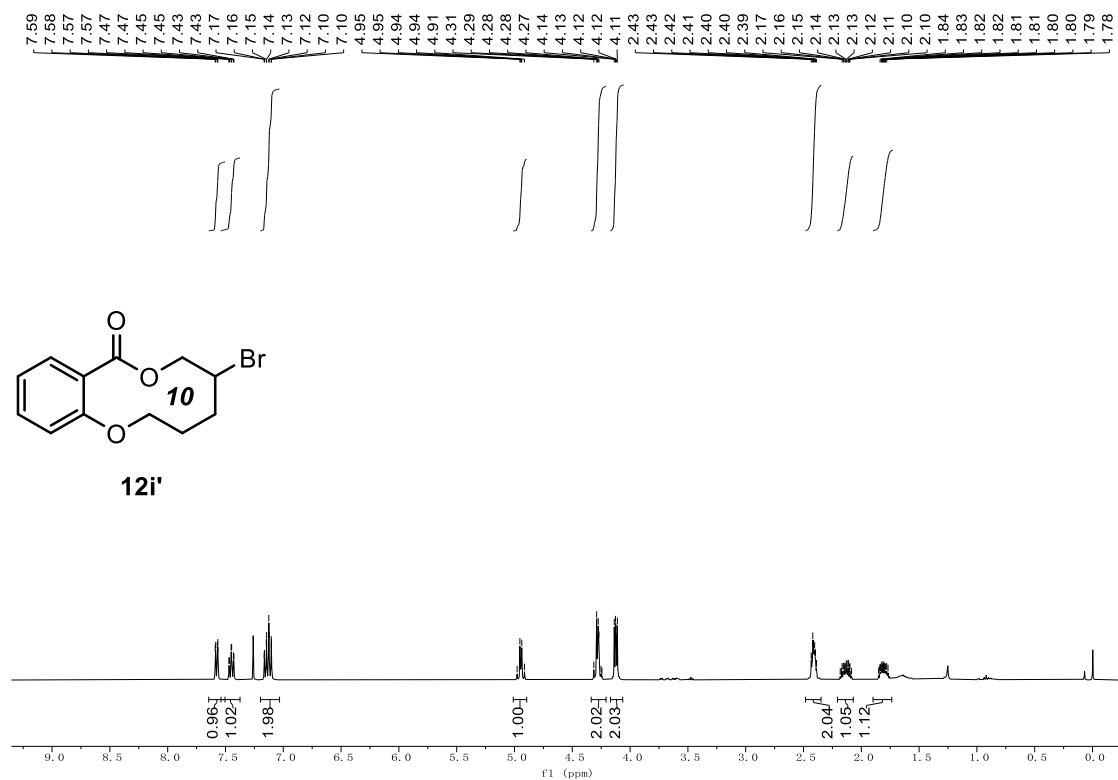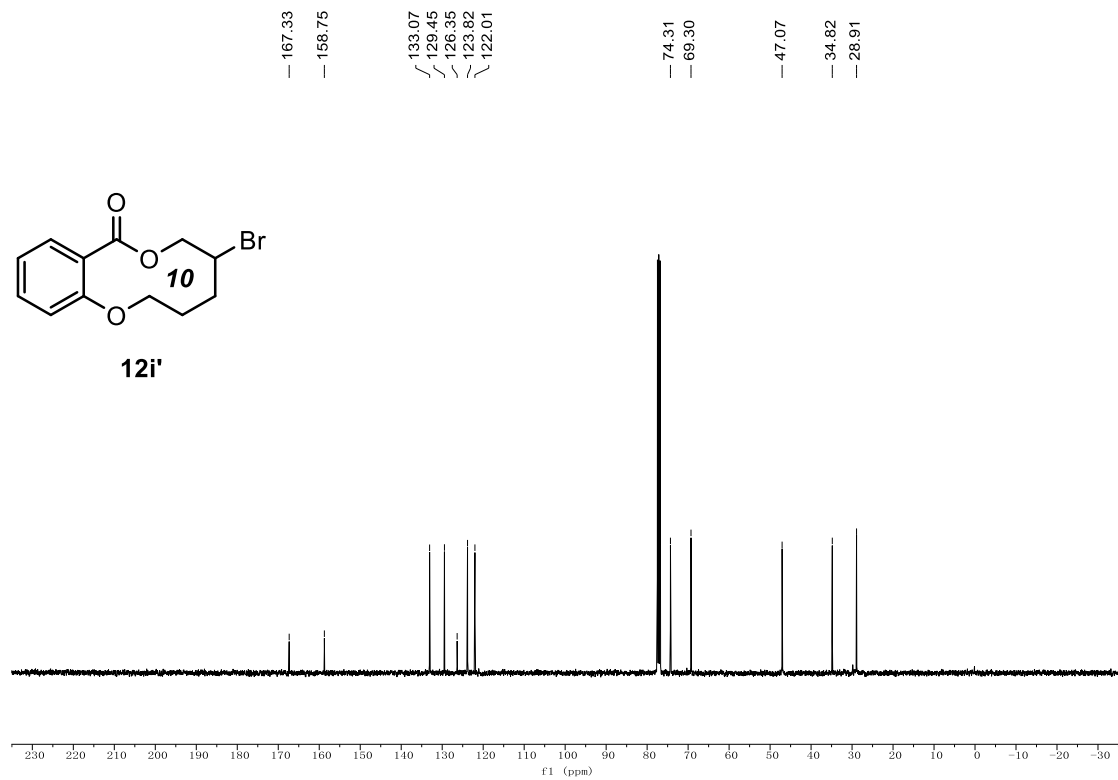

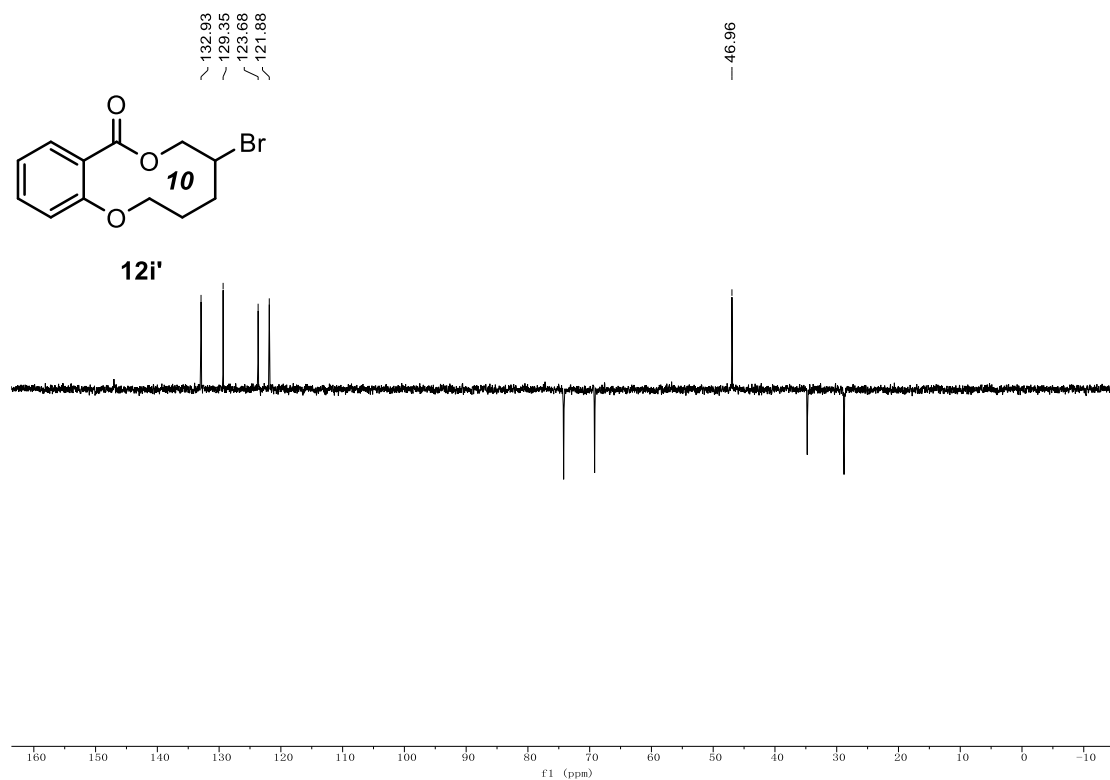

Figure S213. DEPT 135 of 5-bromo-3,4,5,6-tetrahydro-2H,8H-benzo[*b*][1,5]dioxecin-8-one (**12i'**)

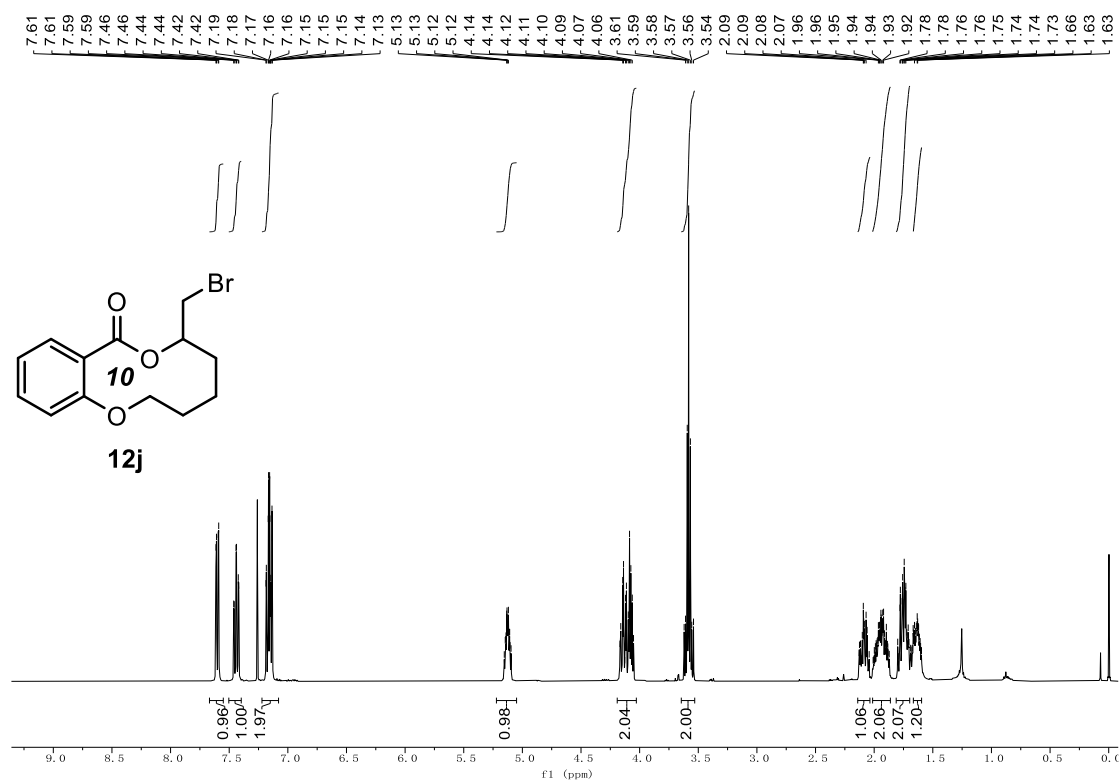

Figure S214. <sup>1</sup>H NMR of 6-(bromomethyl)-3,4,5,6-tetrahydro-2H,8H-benzo[*b*][1,5]dioxecin-8-one (**12j**)

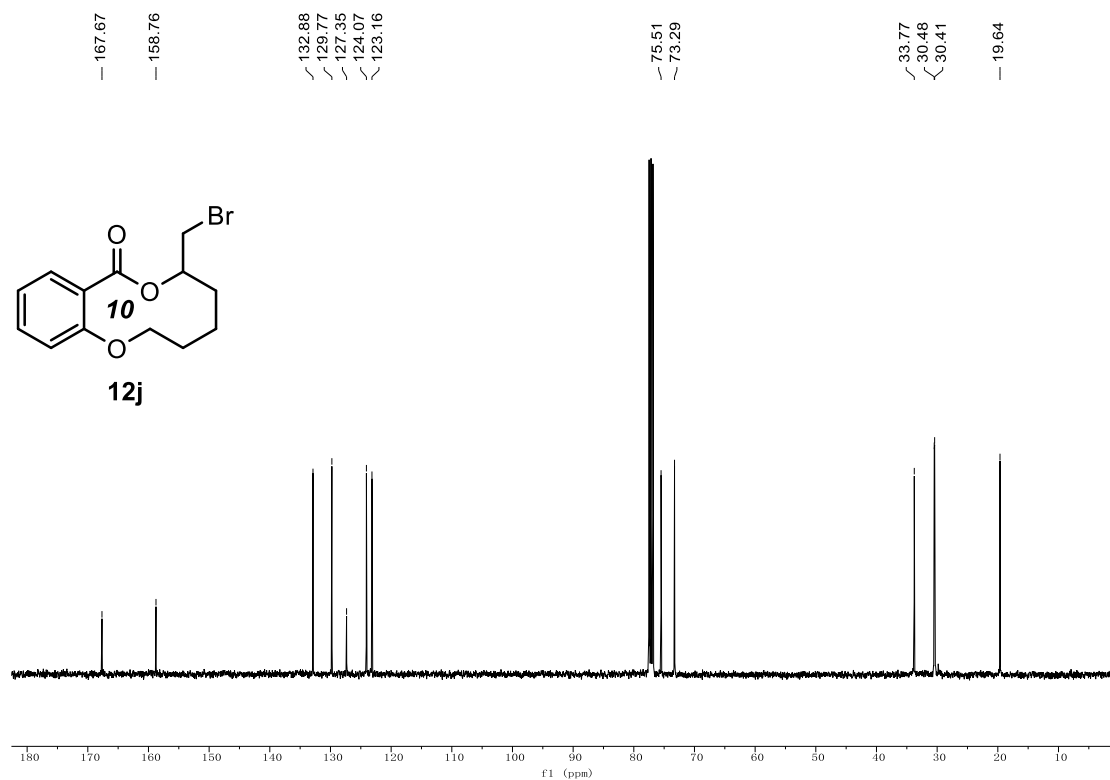

**Figure S215.** <sup>13</sup>C NMR of 6-(bromomethyl)-3,4,5,6-tetrahydro-2H,8H-benzo[b][1,5]dioxecin-8-one (**12j**)

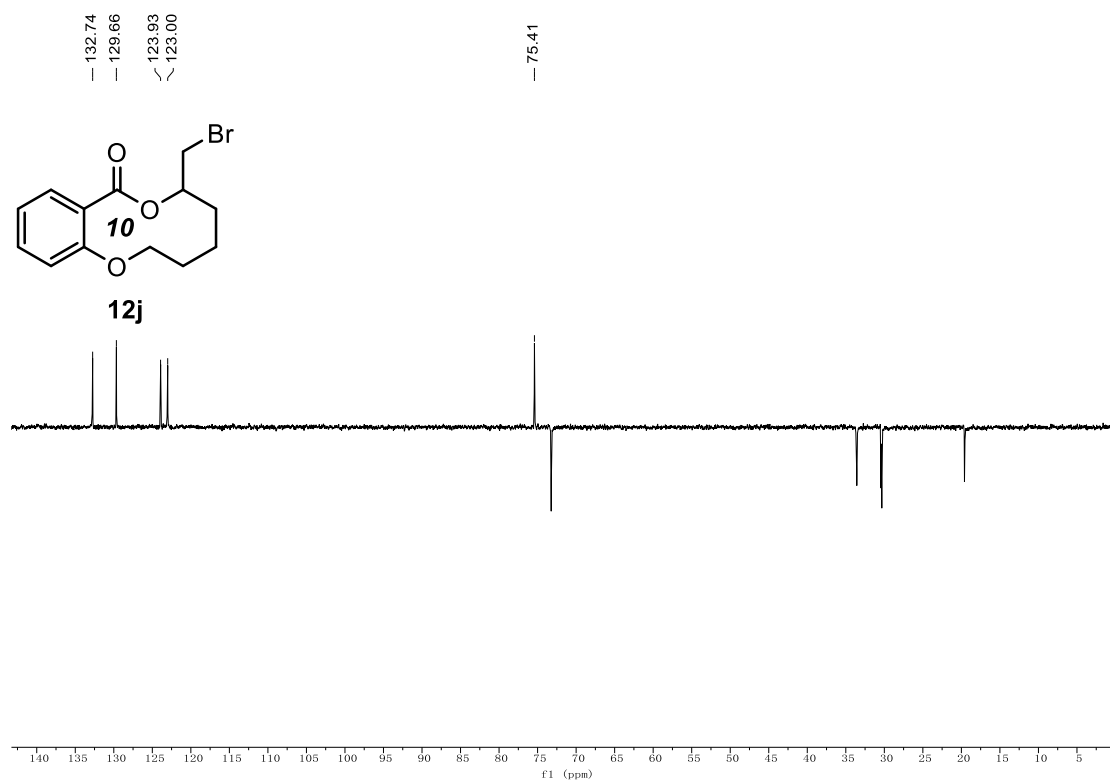

**Figure S216.** DEPT 135 of 6-(bromomethyl)-3,4,5,6-tetrahydro-2H,8H-benzo[b][1,5]dioxecin-8-one (**12j**)

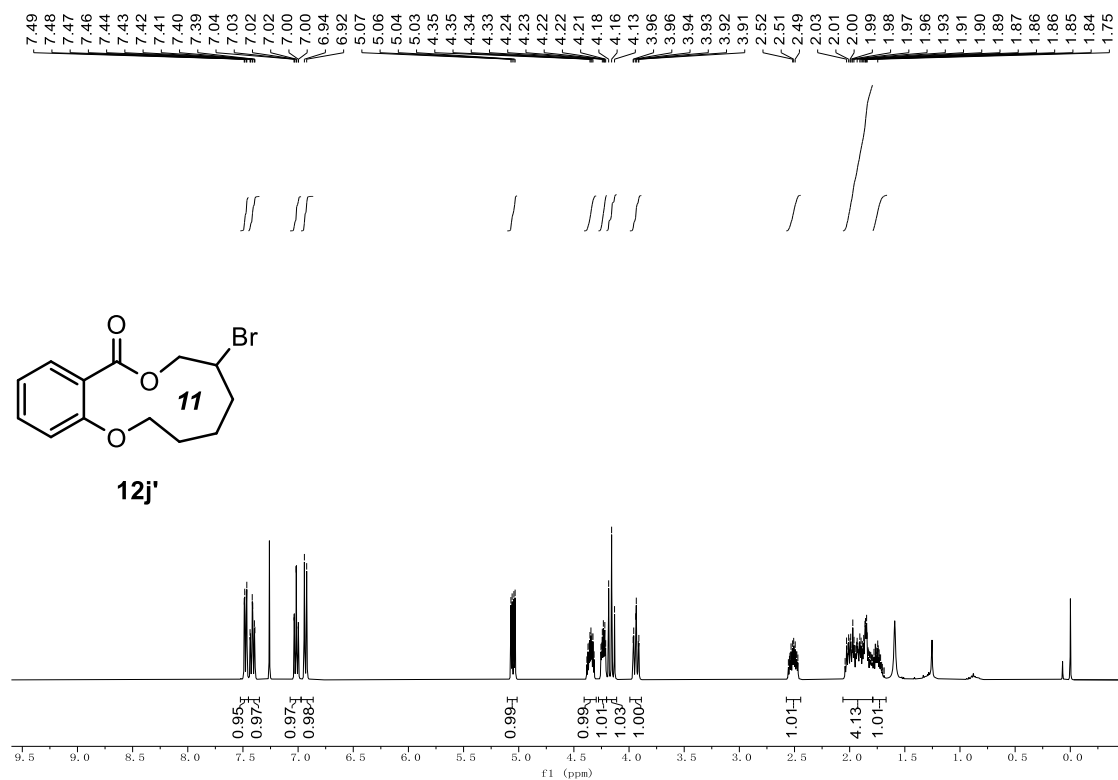

Figure S217. <sup>1</sup>H NMR of 6-bromo-2,3,4,5,6,7-hexahydro-9H-benzo[b][1,5]dioxacycloundecin-9-one (**12j'**)

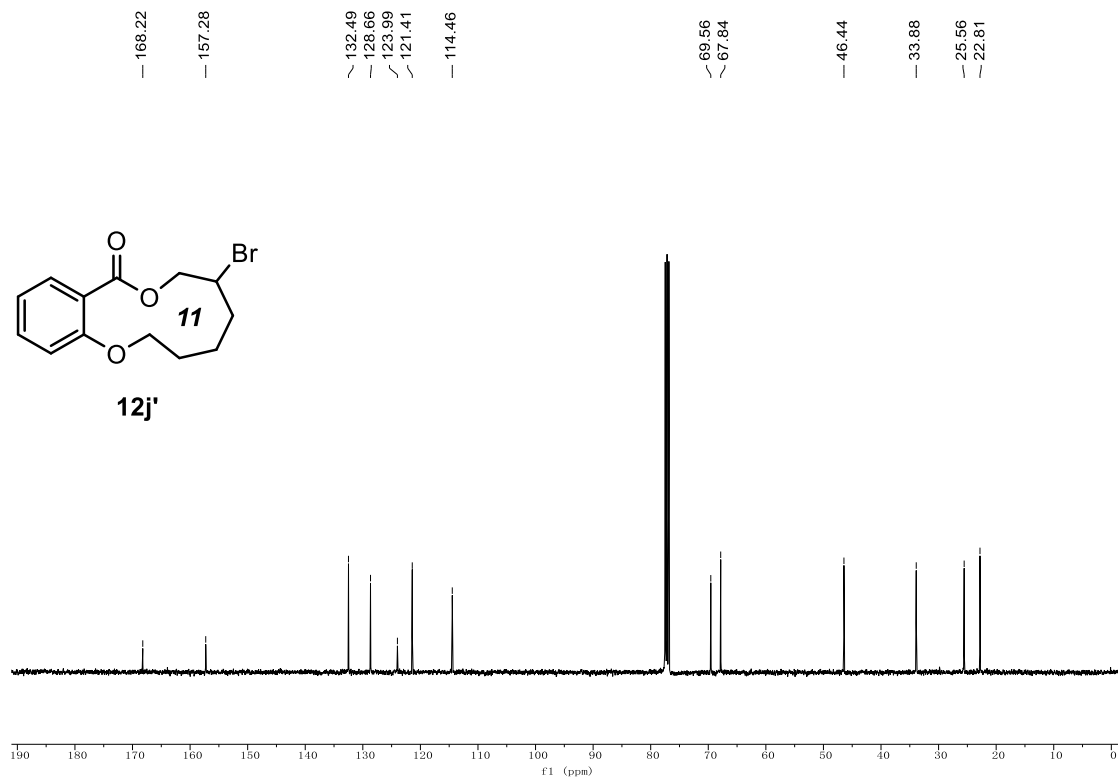

Figure S218. <sup>13</sup>C NMR of 6-bromo-2,3,4,5,6,7-hexahydro-9H-benzo[b][1,5]dioxacycloundecin-9-one (**12j'**)

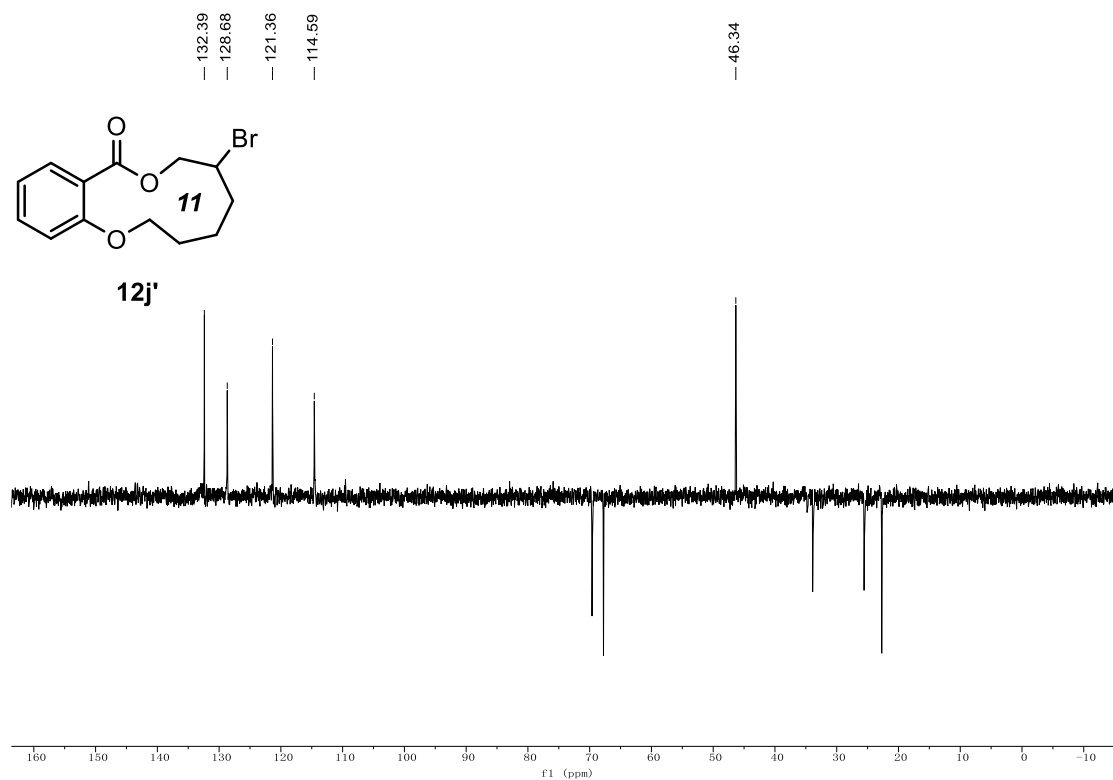

Figure S219. DEPT 135 of 6-bromo-2,3,4,5,6,7-hexahydro-9*H*-benzo[*b*][1,5]dioxacycloundecin-9-one (**12j'**)

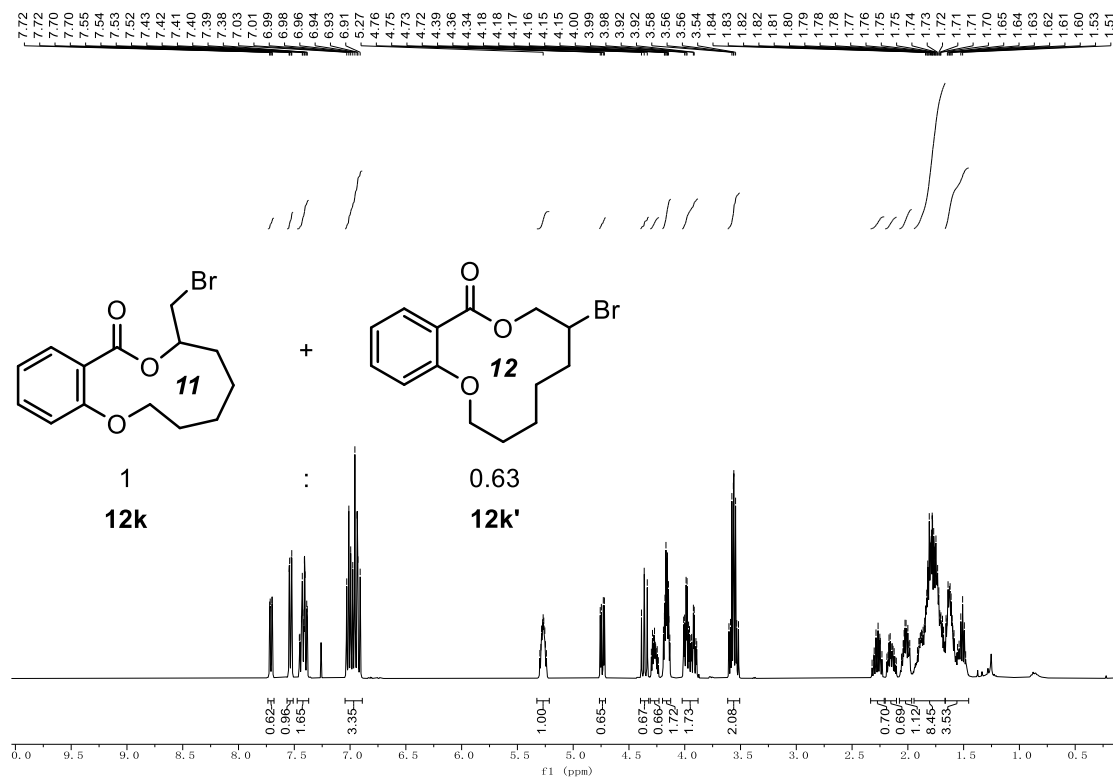

Figure S220.  $^1\text{H}$  NMR of 7-(bromomethyl)-2,3,4,5,6,7-hexahydro-9*H*-benzo[*b*][1,5]dioxacycloundecin-9-one (major) (**12k**) and 7-bromo-3,4,5,6,7,8-hexahydro-2*H*,10*H*-benzo[*b*][1,5]dioxacyclododecin-10-one (minor) (**12k'**)

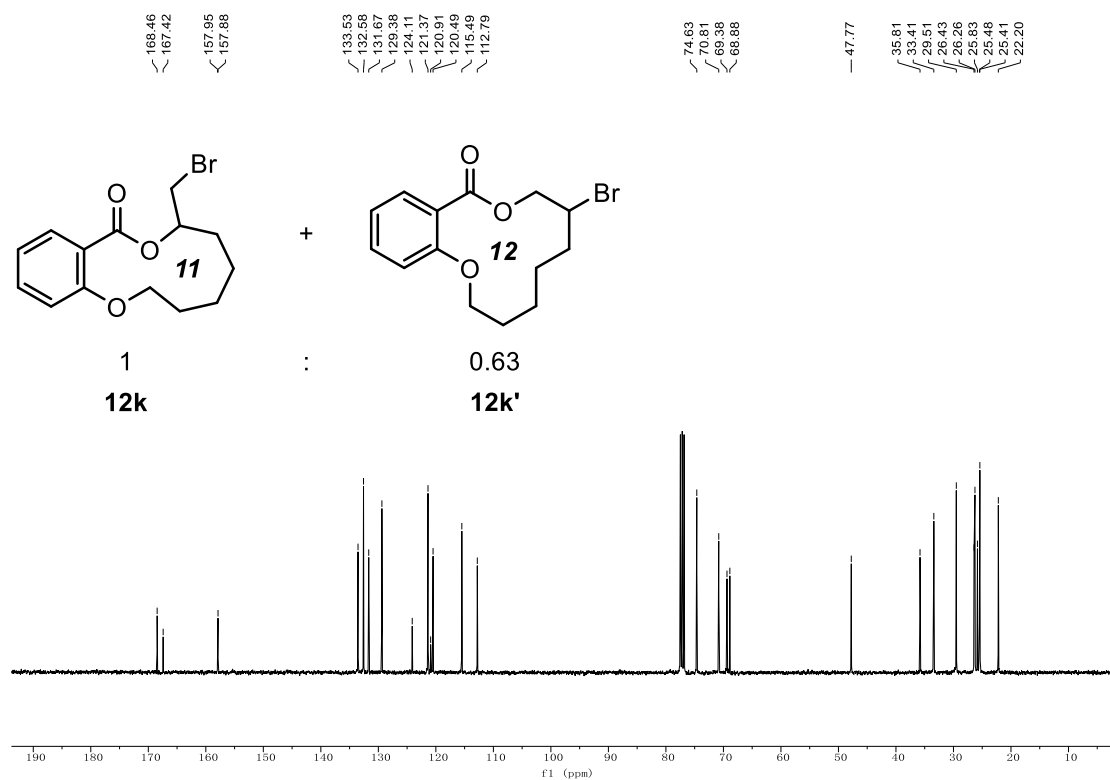

**Figure S221.**  $^{13}\text{C}$  NMR of 7-(bromomethyl)-2,3,4,5,6,7-hexahydro-9*H*-benzo[*b*][1,5]dioxacycloundecin-9-one (major) (**12k**) and 7-bromo-3,4,5,6,7,8-hexahydro-2*H*,10*H*-benzo[*b*][1,5]dioxacyclododecin-10-one (minor) (**12k'**)

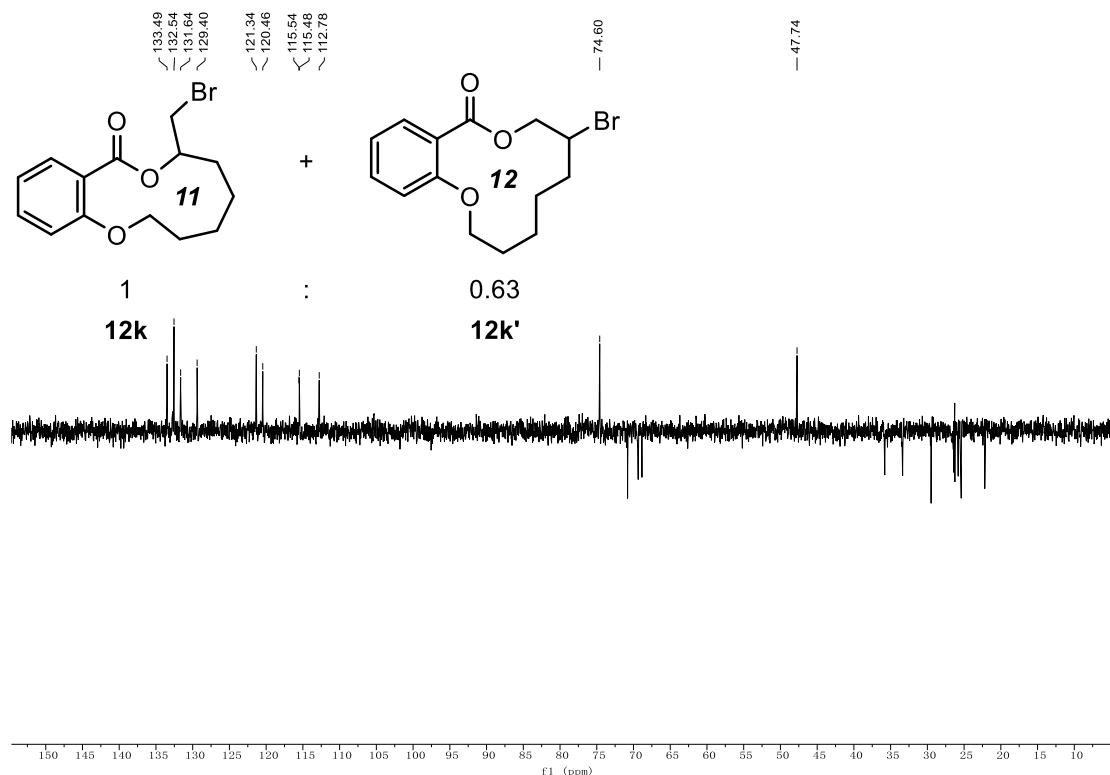

**Figure S222.** DEPT 135 of 7-(bromomethyl)-2,3,4,5,6,7-hexahydro-9*H*-benzo[*b*][1,5]dioxacycloundecin-9-one (major) (**12k**) and 7-bromo-3,4,5,6,7,8-hexahydro-2*H*,10*H*-benzo[*b*][1,5]dioxacyclododecin-10-one (minor) (**12k'**)



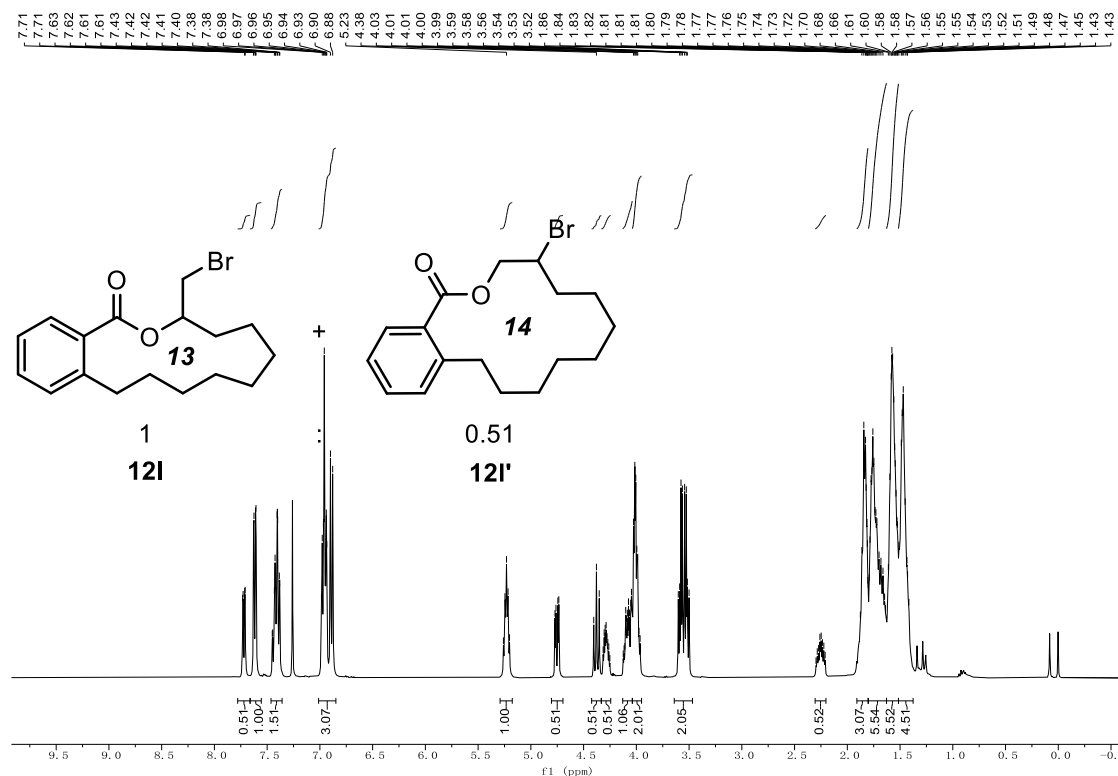

**Figure S223.** <sup>1</sup>H NMR of 3-(bromomethyl)-4,5,6,7,8,9,10,11-octahydrobenzo[*c*][1]oxacyclotridecin-1(3*H*)-one (major) (**12I**) and 4-bromo-3,4,5,6,7,8,9,10,11,12-decahydro-1*H*-benzo[*c*][1]oxacyclotetradecin-1-one (major) (**12I'**)

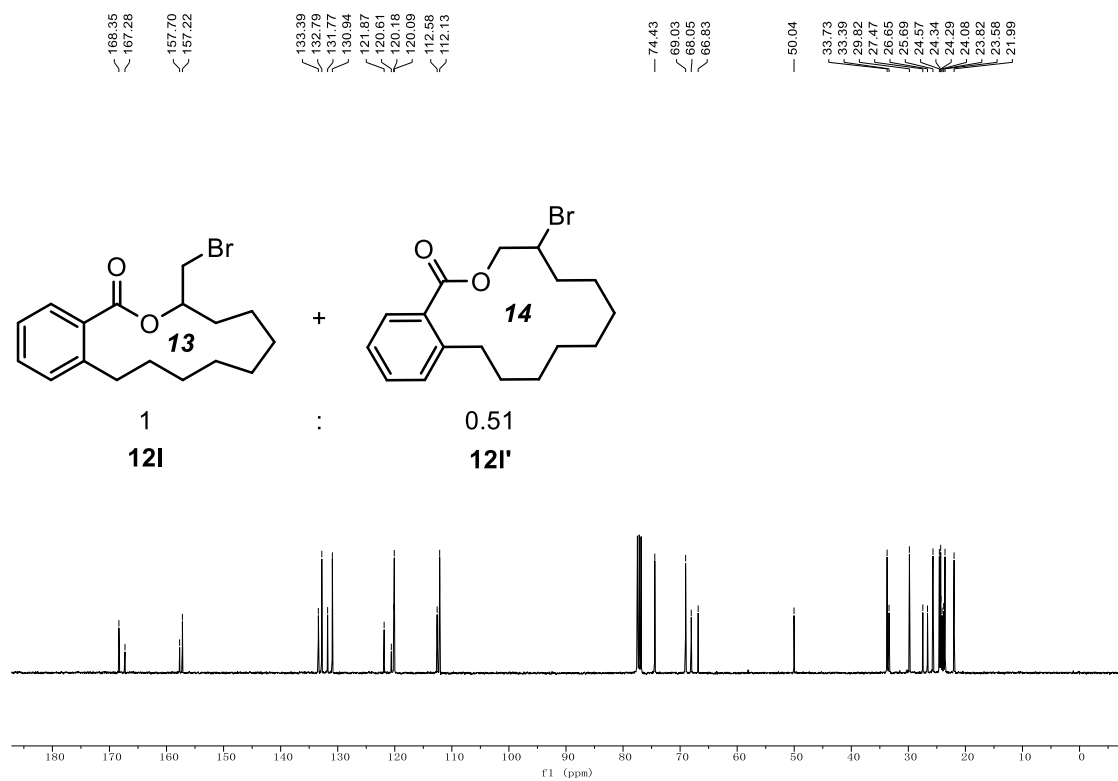

**Figure S224.** <sup>13</sup>C NMR of 3-(bromomethyl)-4,5,6,7,8,9,10,11-octahydrobenzo[*c*][1]oxacyclotridecin-1(3*H*)-one (major) (**12I**) and 4-bromo-3,4,5,6,7,8,9,10,11,12-decahydro-1*H*-benzo[*c*][1]oxacyclotetradecin-1-one (major) (**12I'**)

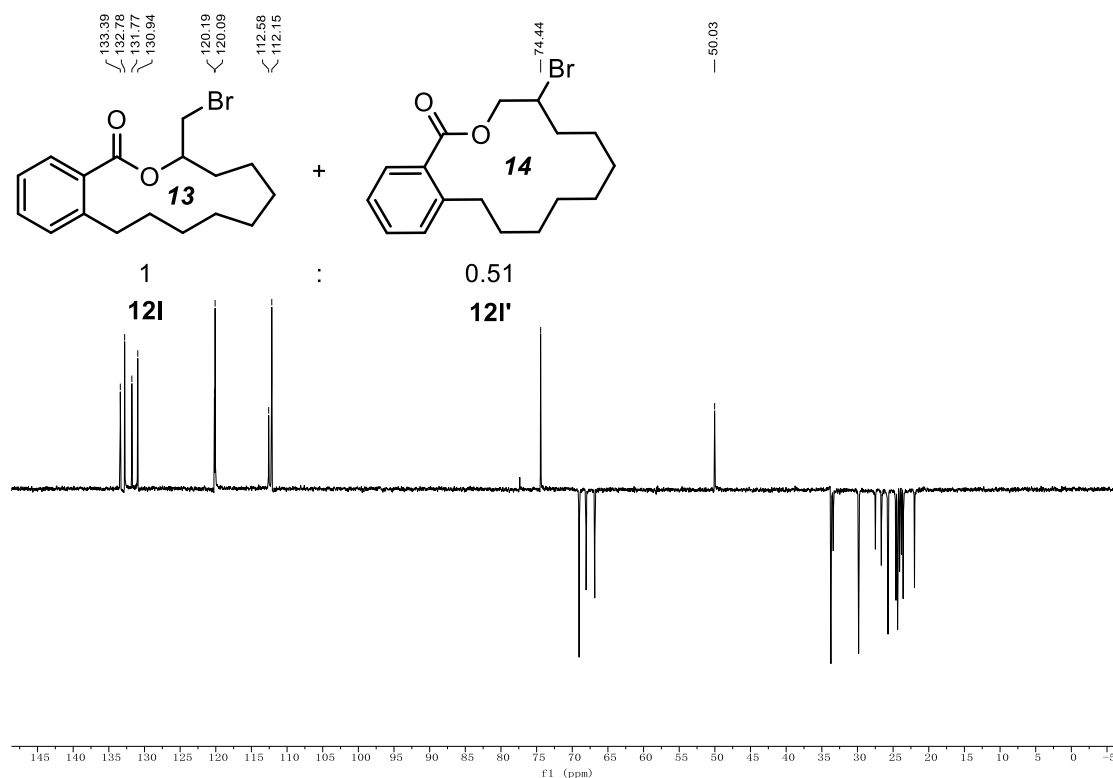

**Figure S225.** DEPT 135 of 3-(bromomethyl)-4,5,6,7,8,9,10,11-octahydrobenzo[c][1]oxacyclotridecin-1(3H)-one (major) (**12l**) and 4-bromo-3,4,5,6,7,8,9,10,11,12-decahydro-1H-benzo[c][1]oxacyclotetradecin-1-one (major) (**12l'**)

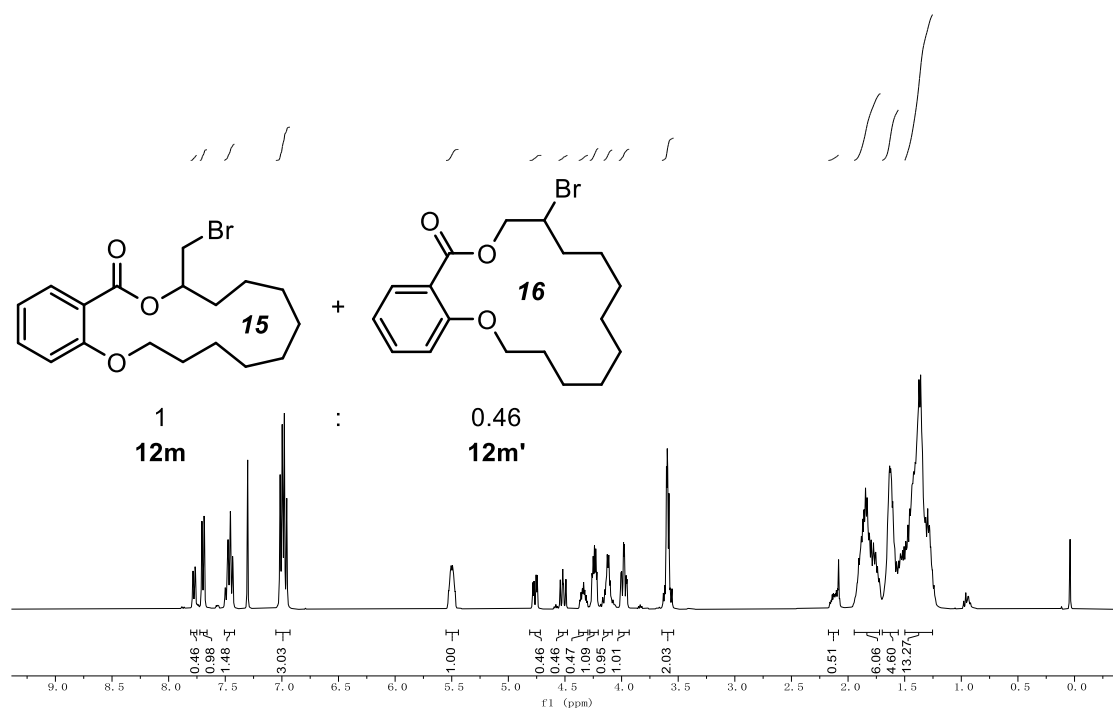

**Figure S226.** <sup>1</sup>H NMR of 11-(bromomethyl)-2,3,4,5,6,7,8,9,10,11-decahydro-13H-benzo[b][1,5]dioxacyclopentadecin-13-one (**12m**) and 11-bromo-3,4,5,6,7,8,9,10,11,12-decahydro-2H,14H-benzo[b][1,5]dioxacyclohexadecin-14-one (**12m'**)

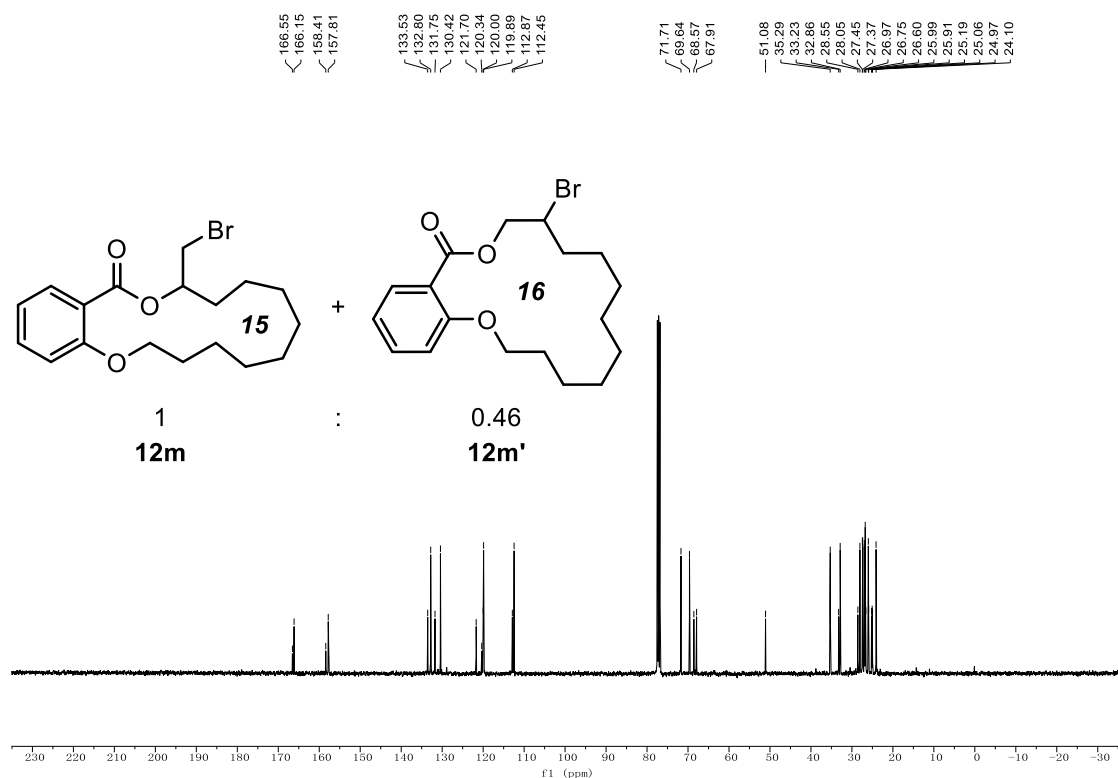

**Figure S227.** <sup>13</sup>C NMR of 11-(bromomethyl)-2,3,4,5,6,7,8,9,10,11-decahydro-13H-benzo[*b*][1,5]dioxacyclopentadecin-13-one (**12m**) and 11-bromo-3,4,5,6,7,8,9,10,11,12-decahydro-2*H*,14*H*-benzo[*b*][1,5]dioxacyclohexadecin-14-one (**12m'**)

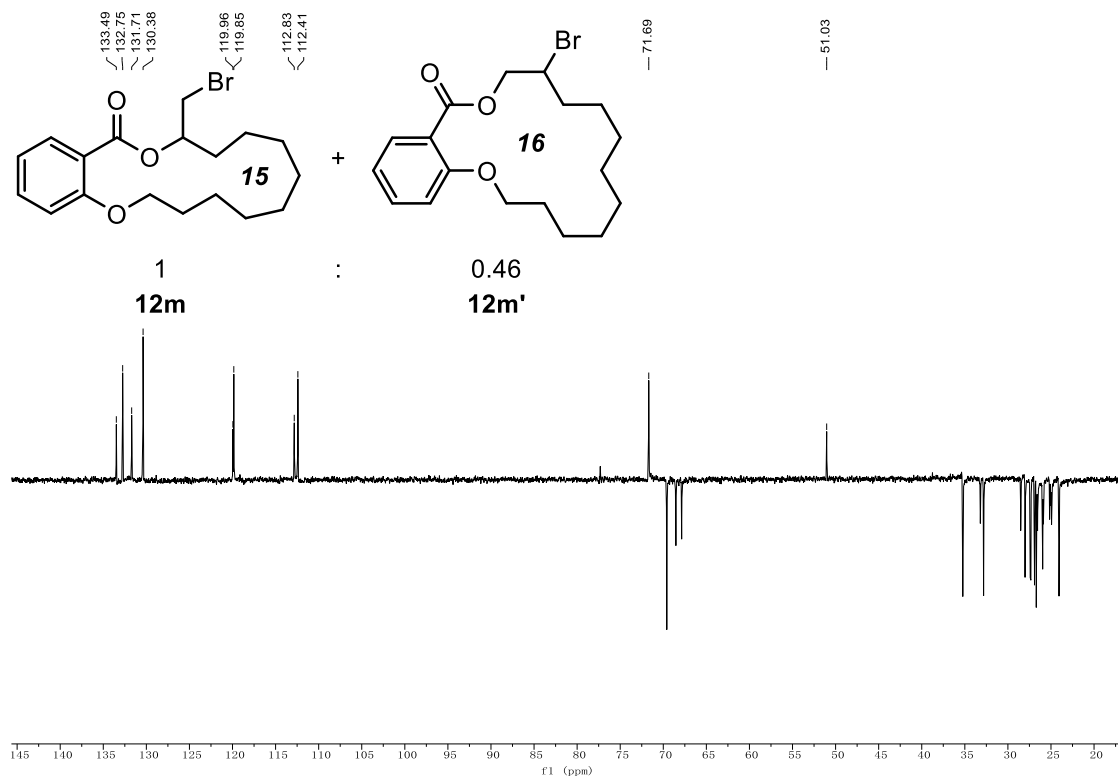

**Figure S228.** DEPT 135 of 11-(bromomethyl)-2,3,4,5,6,7,8,9,10,11-decahydro-13H-benzo[*b*][1,5]dioxacyclopentadecin-13-one (**12m**) and 11-bromo-3,4,5,6,7,8,9,10,11,12-decahydro-2*H*,14*H*-benzo[*b*][1,5]dioxacyclohexadecin-14-one (**12m'**)

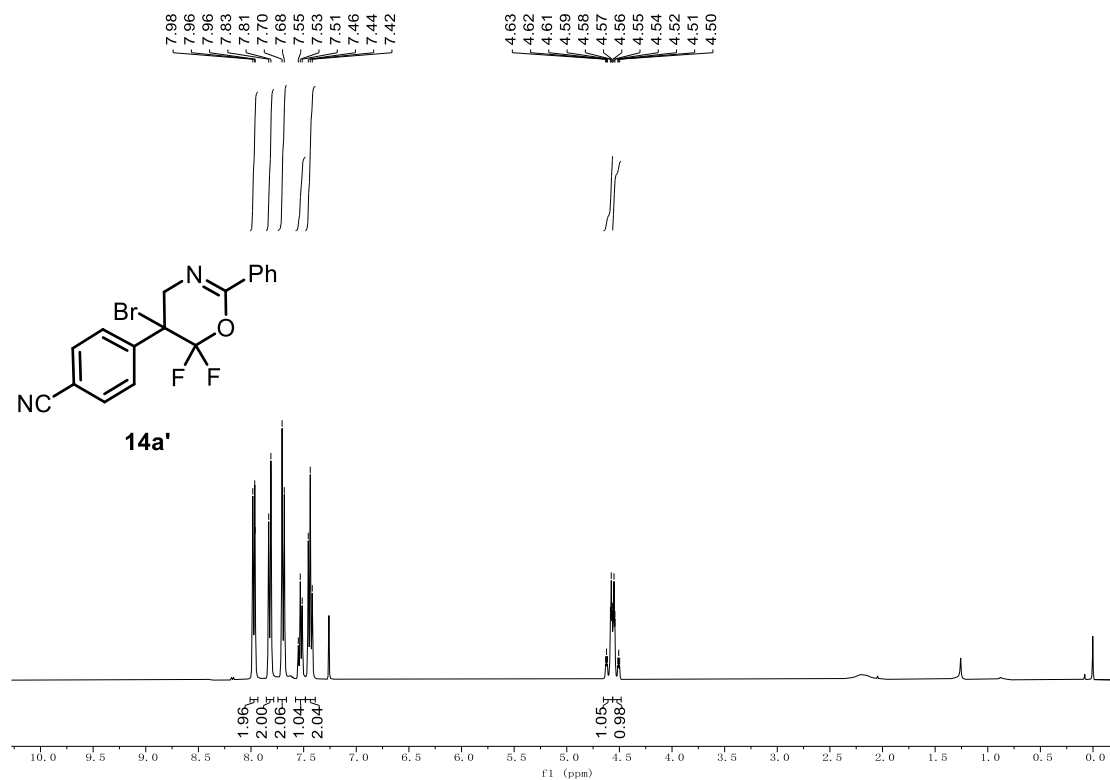

**Figure S229.** <sup>1</sup>H NMR of 4-(5-bromo-6,6-difluoro-2-phenyl-5,6-dihydro-4H-1,3-oxazin-5-yl)benzonitrile (**14a'**)

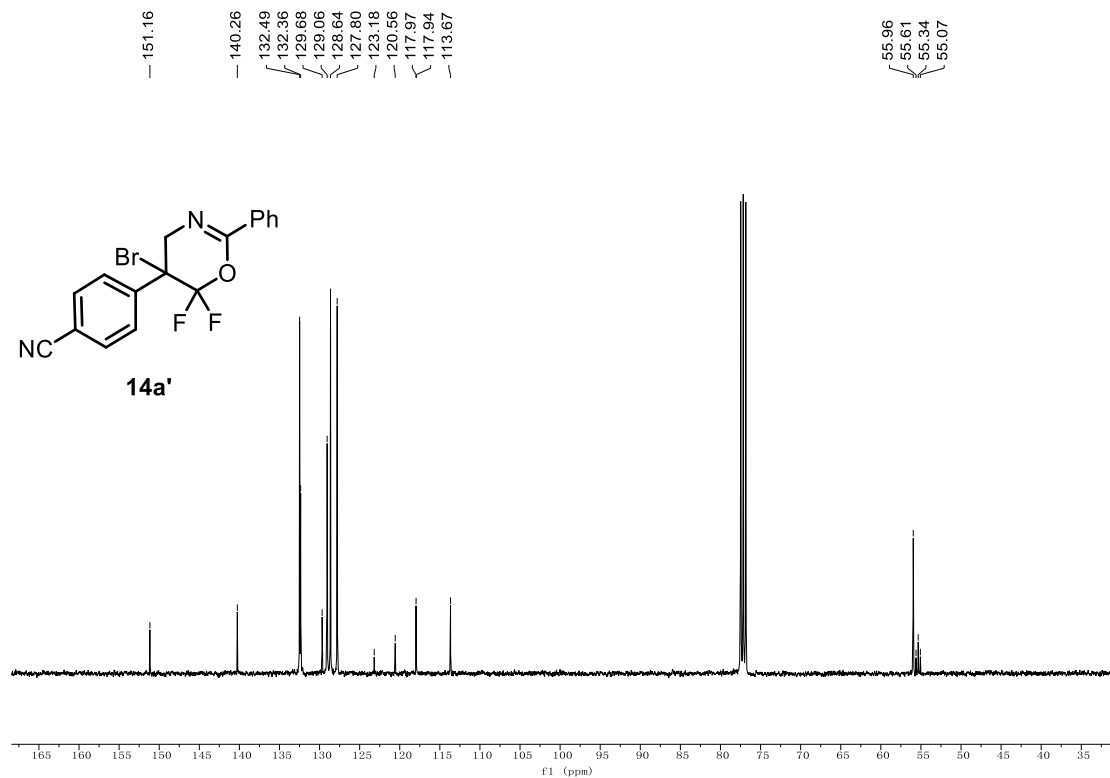

**Figure S230.** <sup>13</sup>C NMR of 4-(5-bromo-6,6-difluoro-2-phenyl-5,6-dihydro-4H-1,3-oxazin-5-yl)benzonitrile (**14a'**)

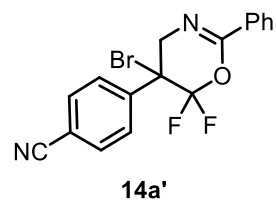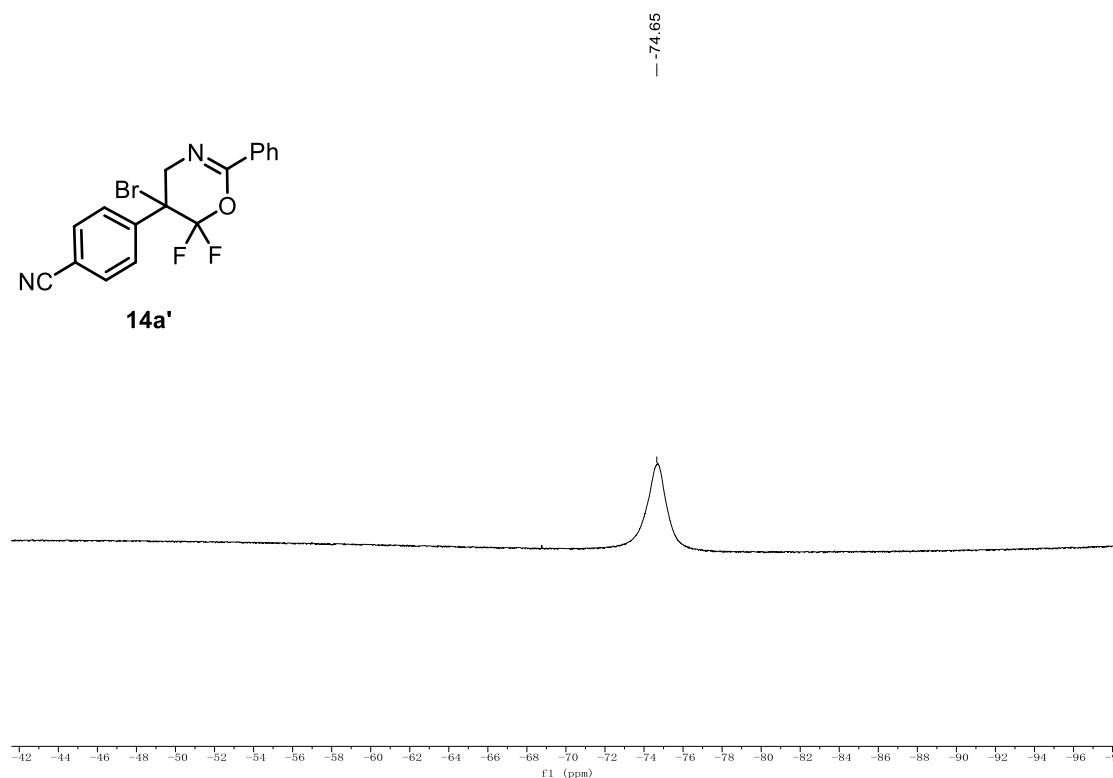

**Figure S231.**  $^{19}\text{F}$  NMR of 4-(5-bromo-6,6-difluoro-2-phenyl-5,6-dihydro-4*H*-1,3-oxazin-5-yl)benzonitrile (**14a'**)

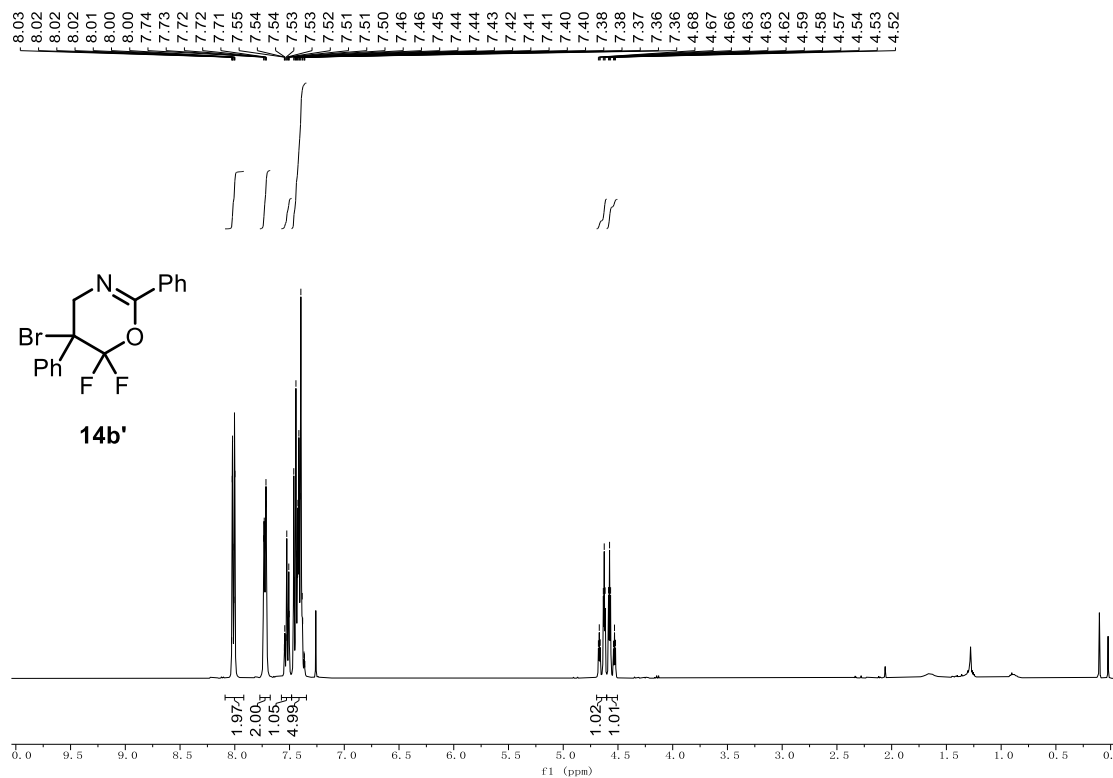

**Figure S232.**  $^1\text{H}$  NMR of 5-bromo-6,6-difluoro-2,5-diphenyl-5,6-dihydro-4*H*-1,3-oxazine (**14b'**)

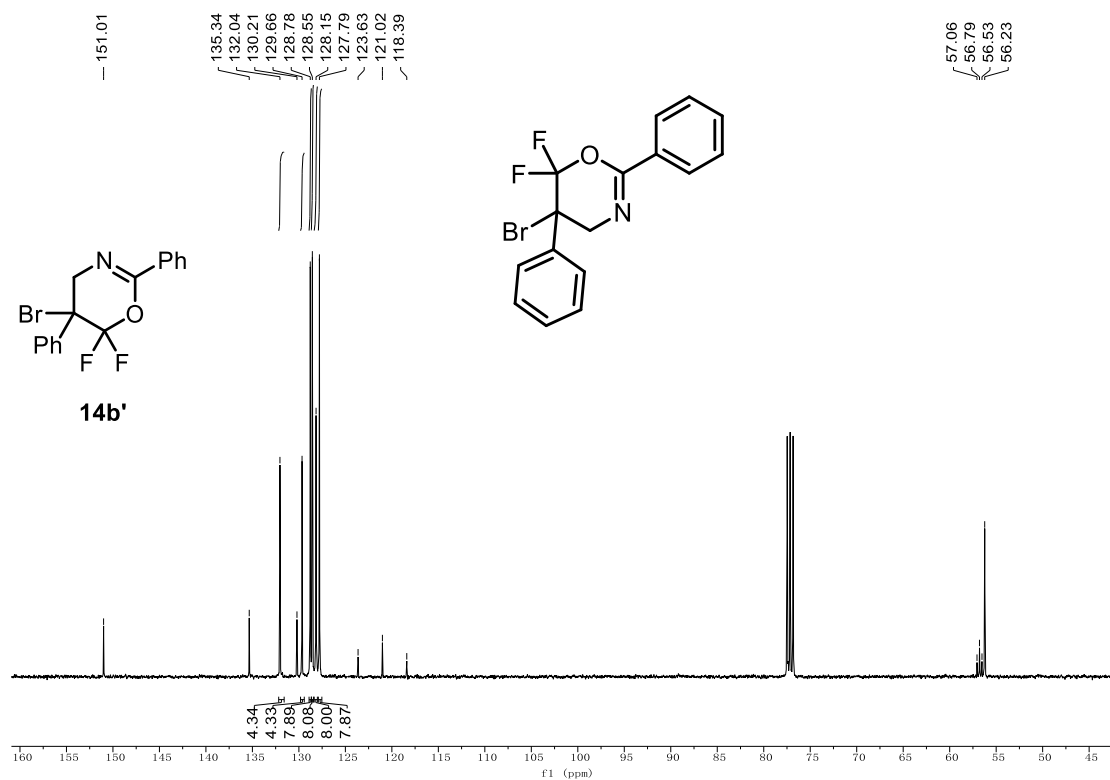

Figure S233. <sup>13</sup>C NMR of 5-bromo-6,6-difluoro-2,5-diphenyl-5,6-dihydro-4H-1,3-oxazine (**14b'**)

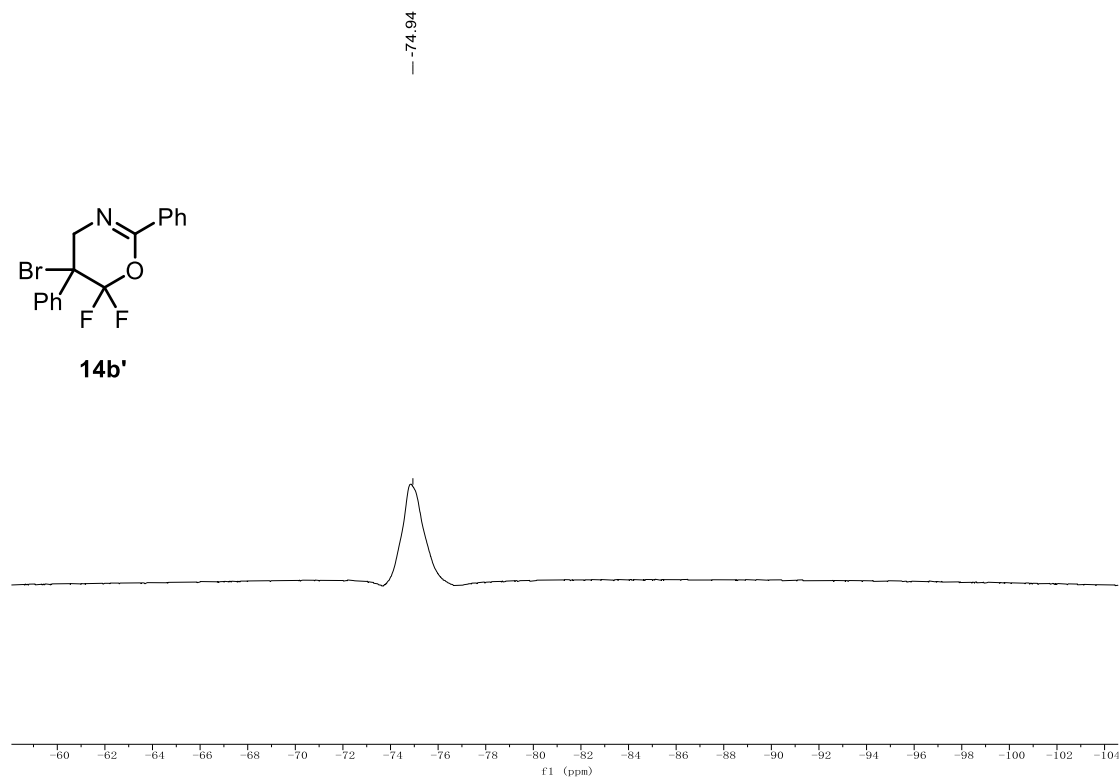

Figure S234. <sup>19</sup>F NMR of 5-bromo-6,6-difluoro-2,5-diphenyl-5,6-dihydro-4H-1,3-oxazine (**14b'**)

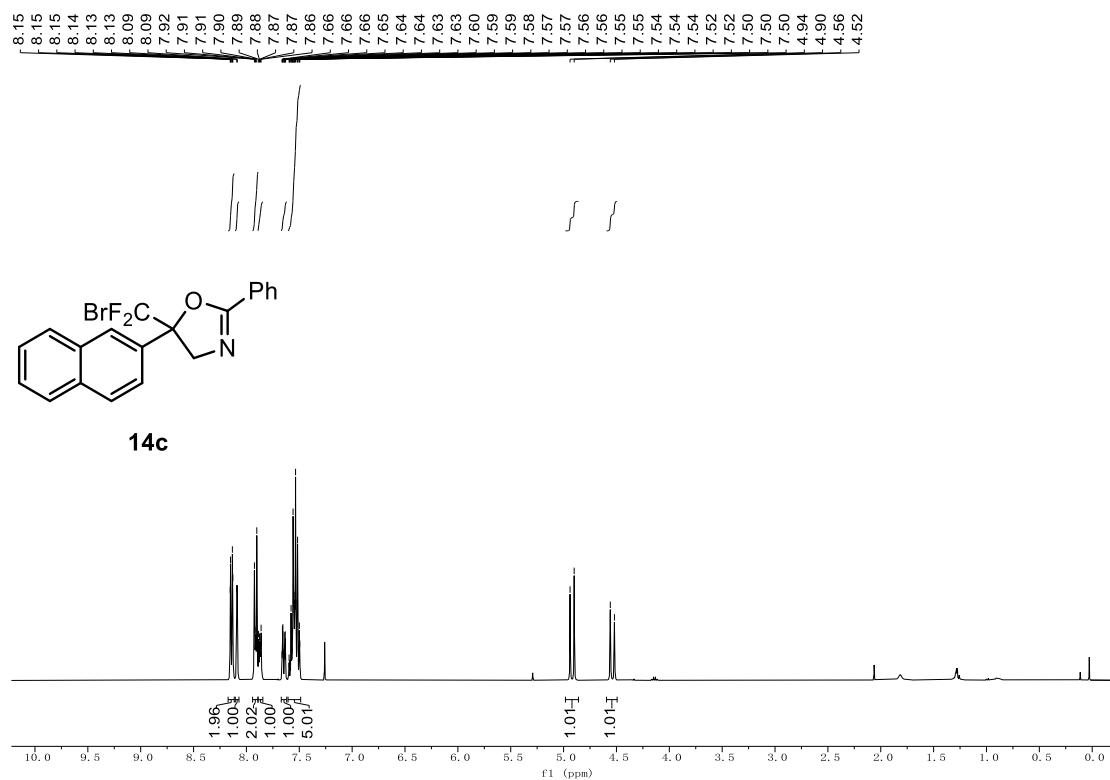

**Figure S235.**  $^1\text{H}$  NMR of 5-(bromodifluoromethyl)-5-(naphthalen-2-yl)-2-phenyl-4,5-dihydrooxazole (**14c**)

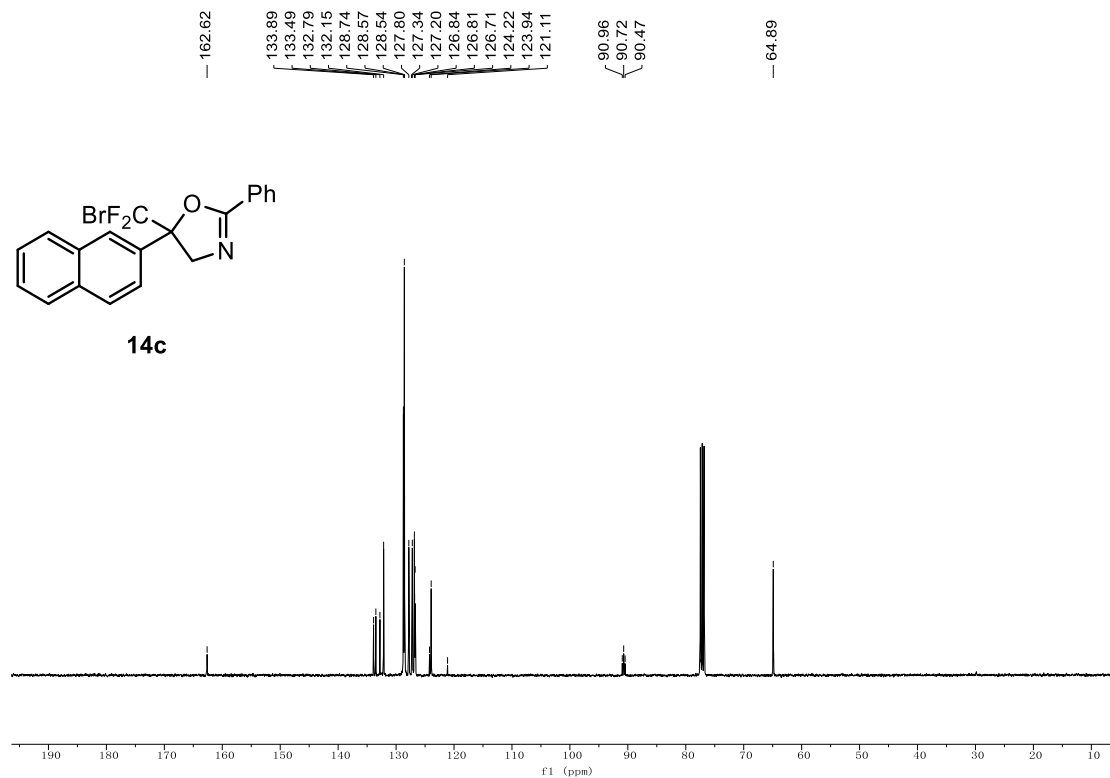

**Figure S236.**  $^{13}\text{C}$  NMR of 5-(bromodifluoromethyl)-5-(naphthalen-2-yl)-2-phenyl-4,5-dihydrooxazole (**14c**)

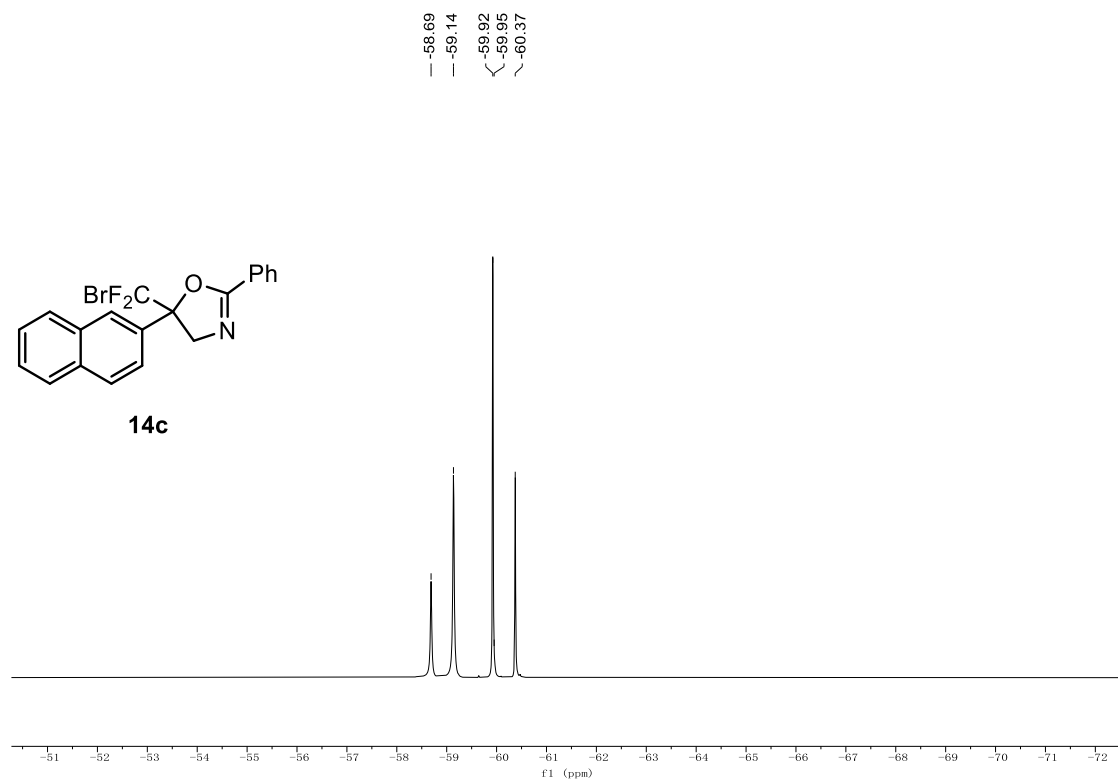

**Figure S237.**  $^{19}\text{F}$  NMR of 5-(bromodifluoromethyl)-5-(naphthalen-2-yl)-2-phenyl-4,5-dihydrooxazole (**14c**)

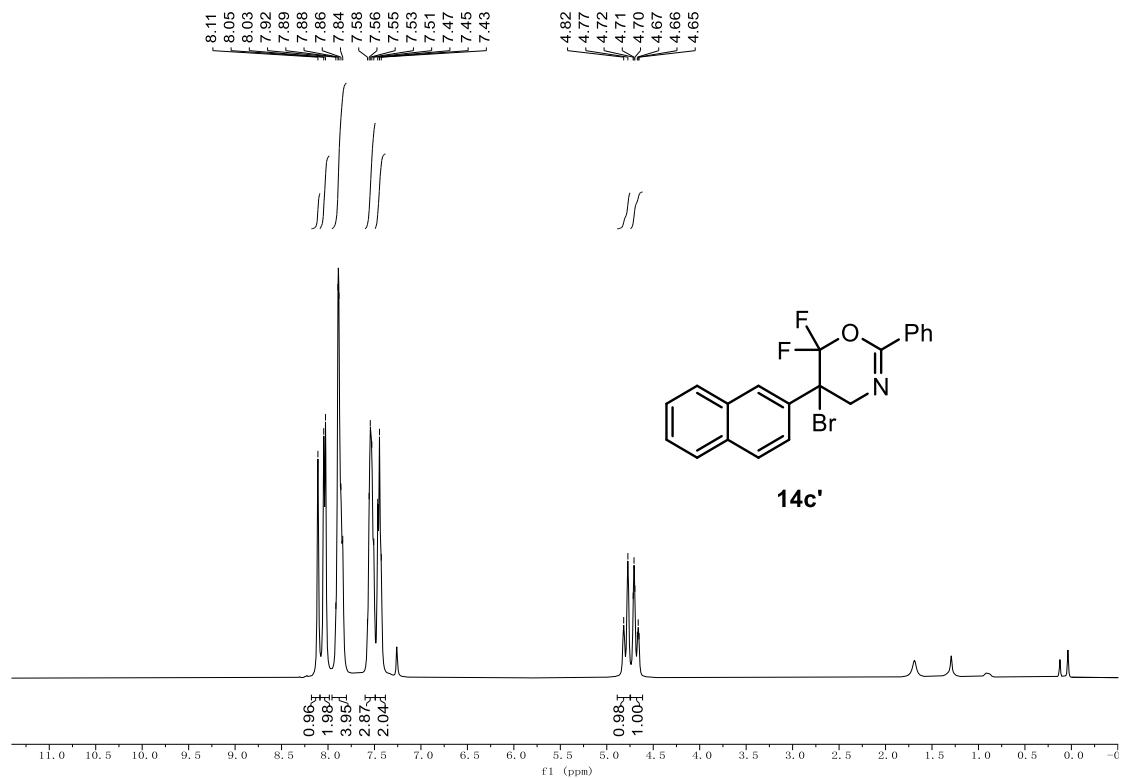

**Figure S238.**  $^1\text{H}$  NMR of 5-bromo-6,6-difluoro-5-(naphthalen-2-yl)-2-phenyl-5,6-dihydro-4H-1,3-oxazine (**14c'**)



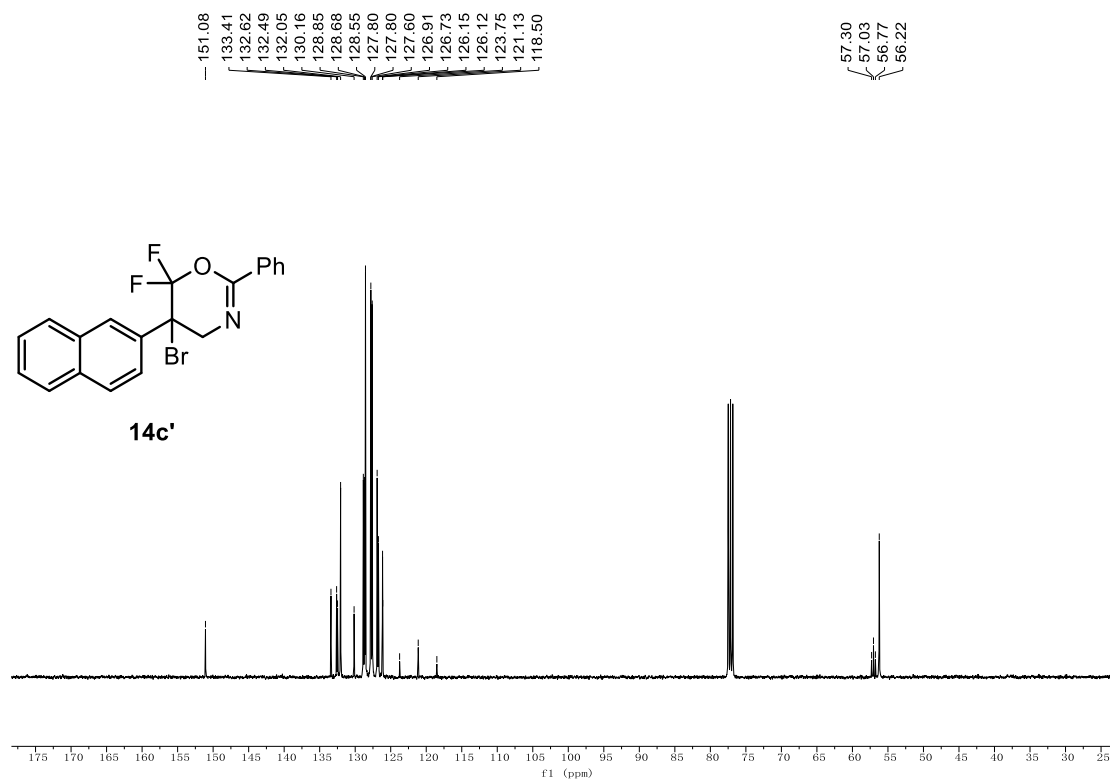

**Figure S239.** <sup>13</sup>C NMR of 5-bromo-6,6-difluoro-5-(naphthalen-2-yl)-2-phenyl-5,6-dihydro-4H-1,3-oxazine (**14c'**)

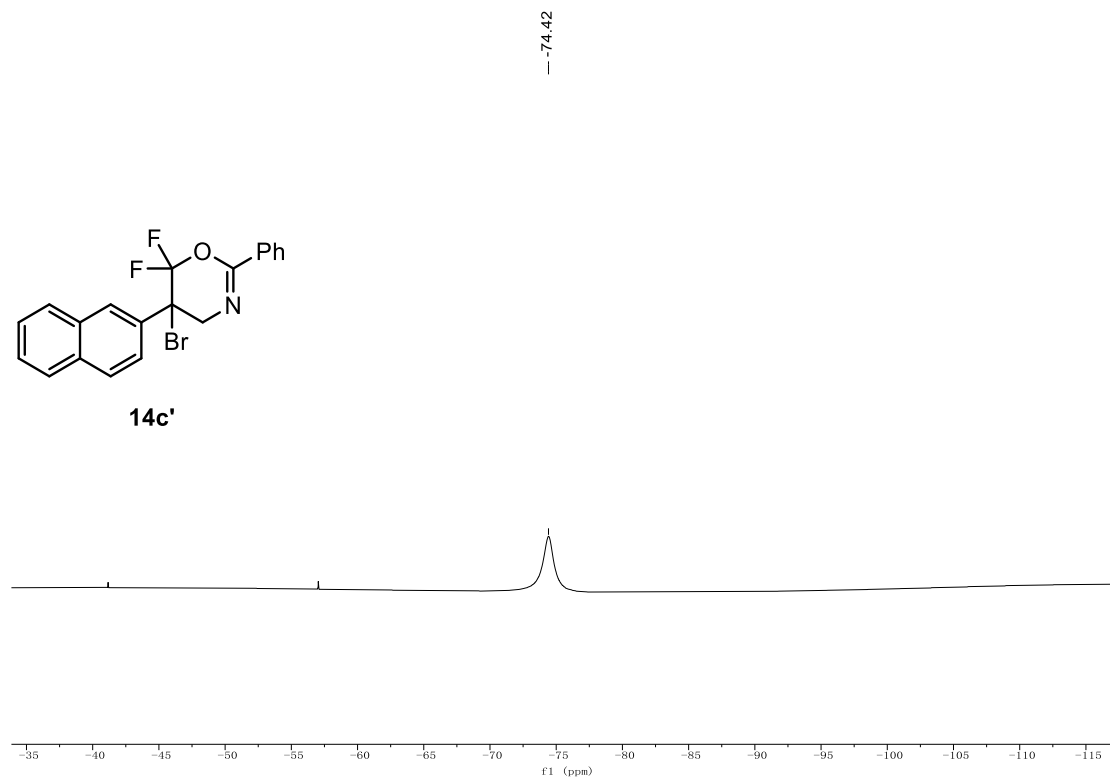

**Figure S240.** <sup>19</sup>F NMR of 5-bromo-6,6-difluoro-5-(naphthalen-2-yl)-2-phenyl-5,6-dihydro-4H-1,3-oxazine (**14c'**)

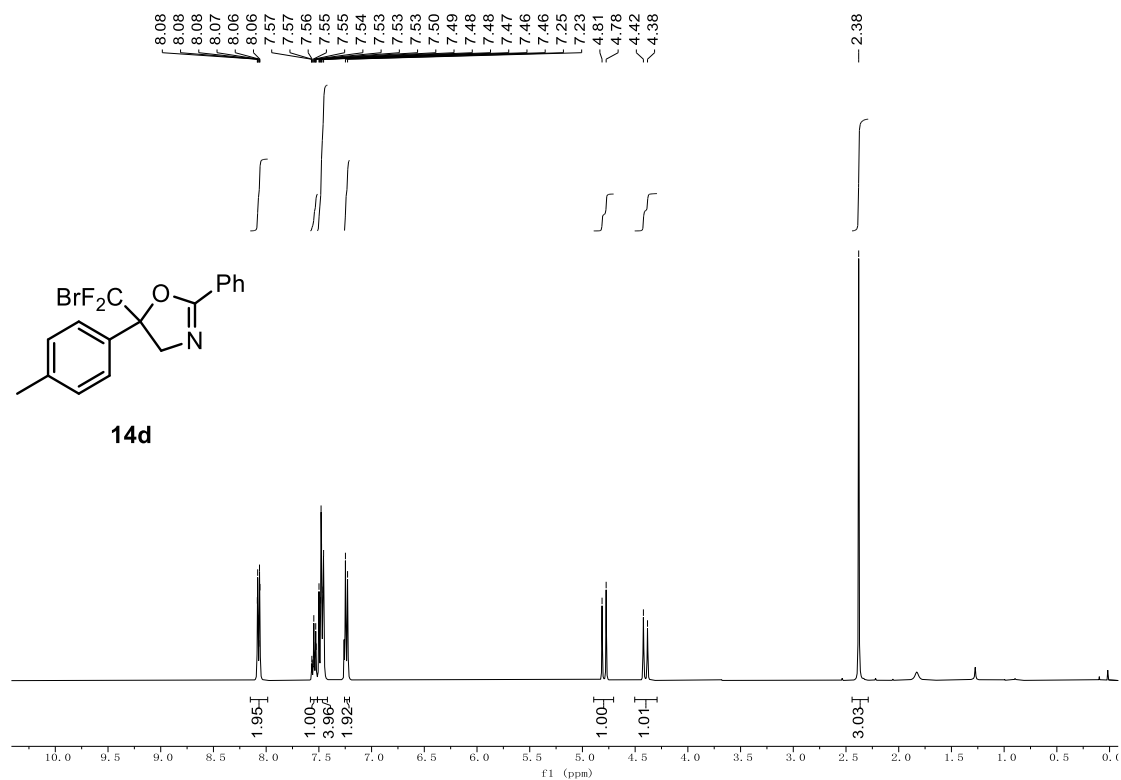

**Figure S241.** <sup>1</sup>H NMR of 5-(bromodifluoromethyl)-2-phenyl-5-(*p*-tolyl)-4,5-dihydrooxazole (**14d**)

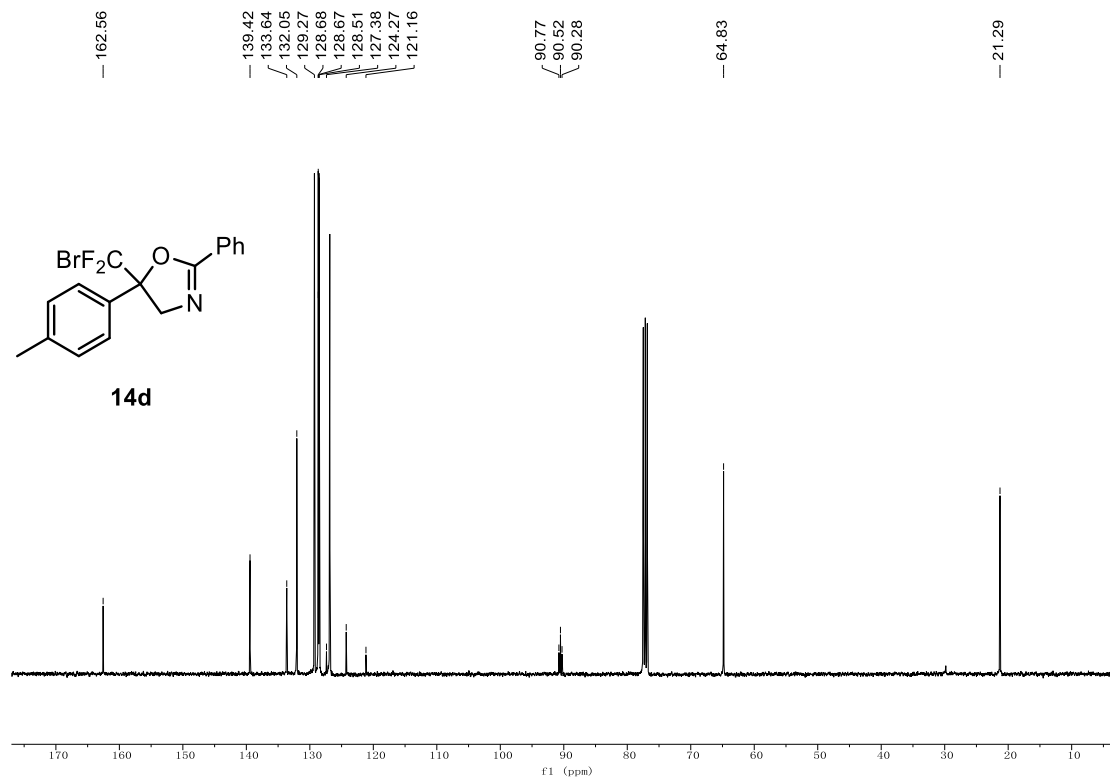

**Figure S242.** <sup>13</sup>C NMR of 5-(bromodifluoromethyl)-2-phenyl-5-(*p*-tolyl)-4,5-dihydrooxazole (**14d**)

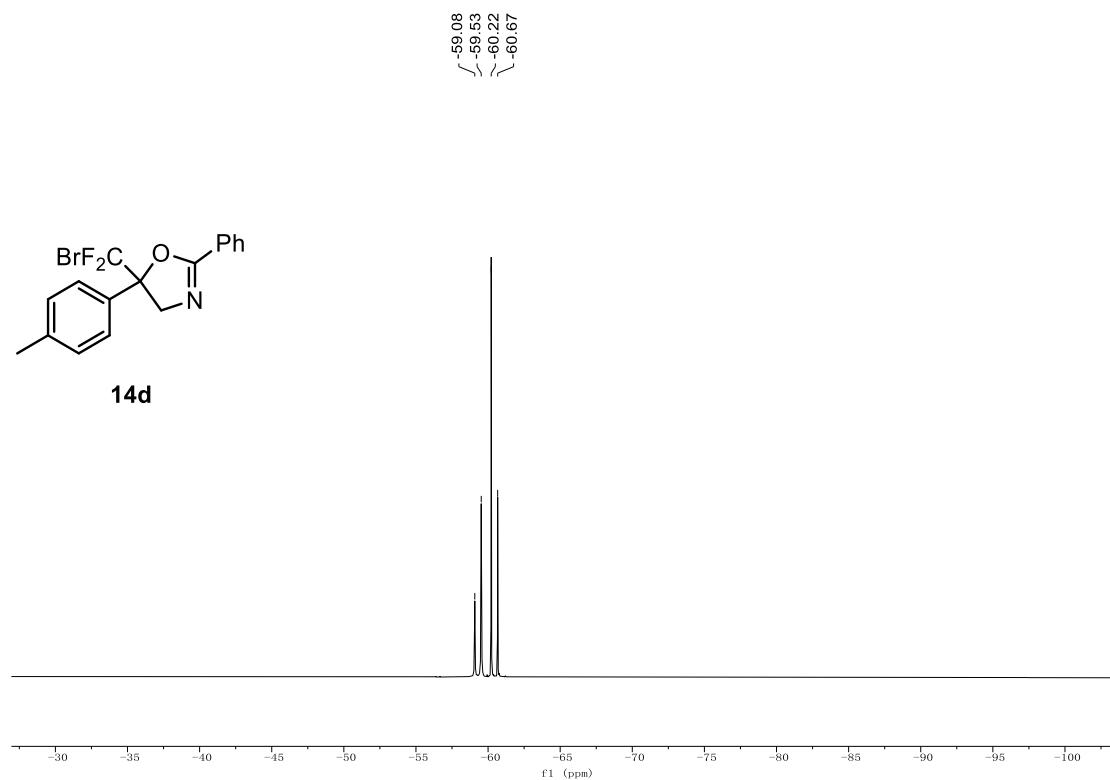

**Figure S243.** <sup>19</sup>F NMR of 5-(bromodifluoromethyl)-2-phenyl-5-(*p*-tolyl)-4,5-dihydrooxazole (**14d**)

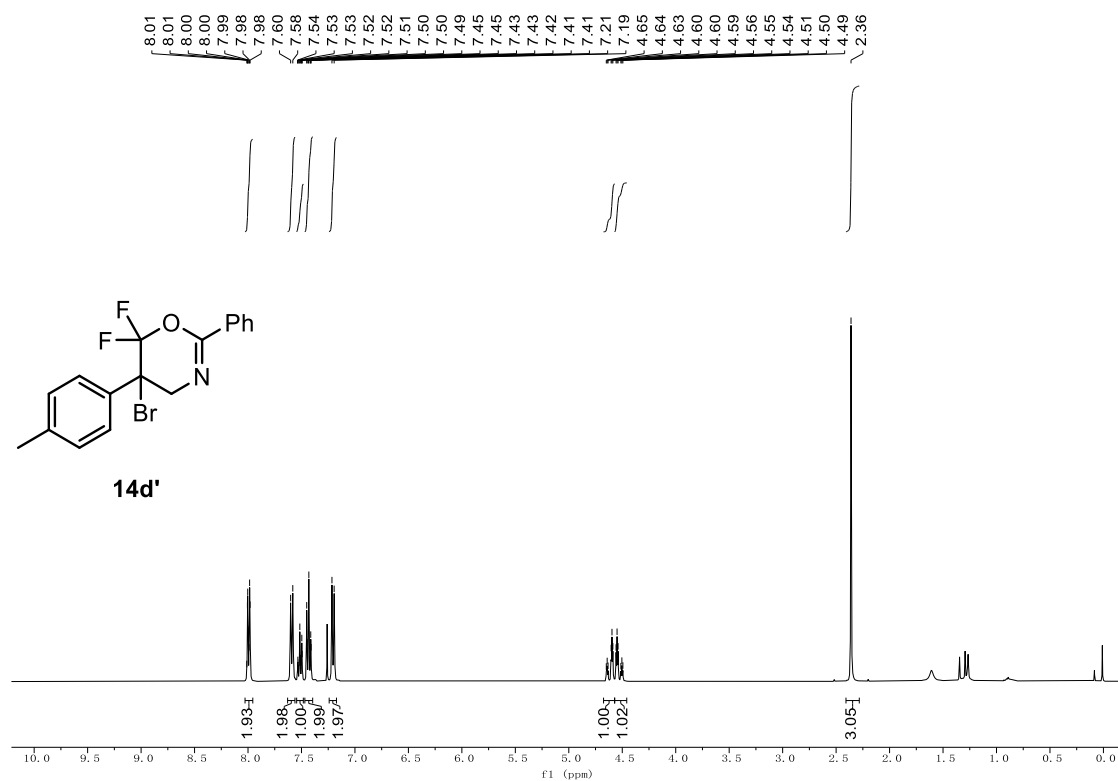

**Figure S244.** <sup>1</sup>H NMR of 5-bromo-6,6-difluoro-2-phenyl-5-(*p*-tolyl)-5,6-dihydro-4H-1,3-oxazine (**14d'**)

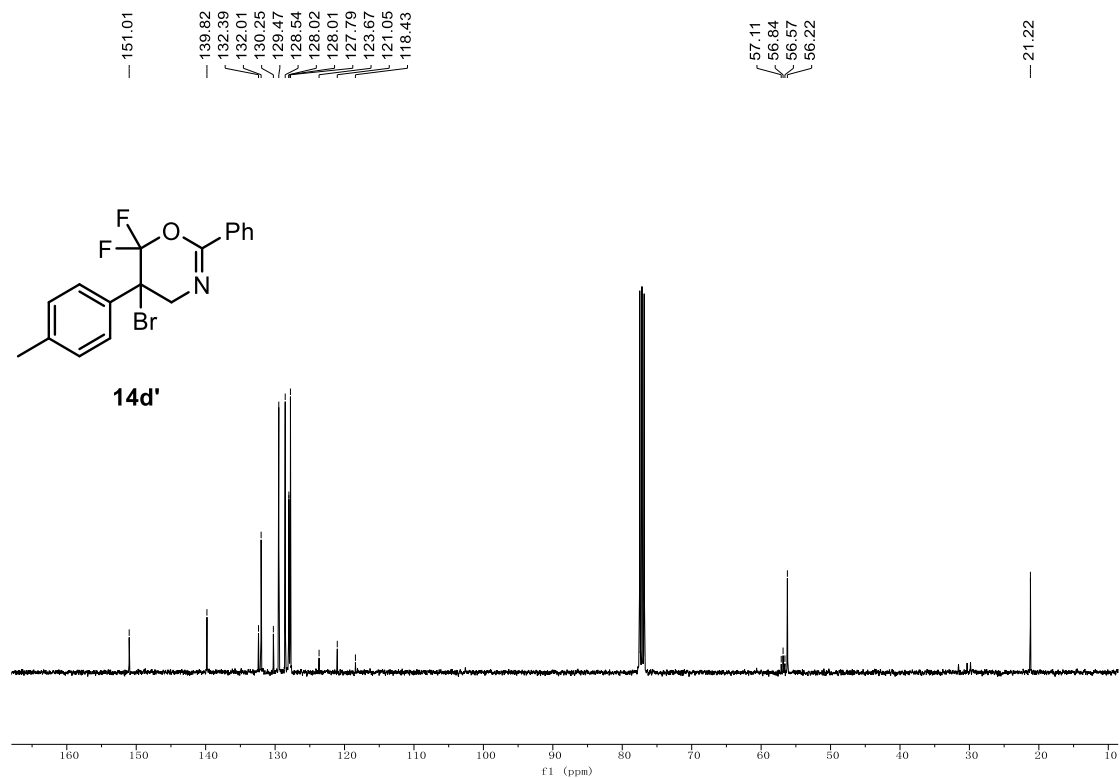

Figure S245.  $^{13}\text{C}$  NMR of 5-bromo-6,6-difluoro-2-phenyl-5-(*p*-tolyl)-5,6-dihydro-4*H*-1,3-oxazine (**14d'**)

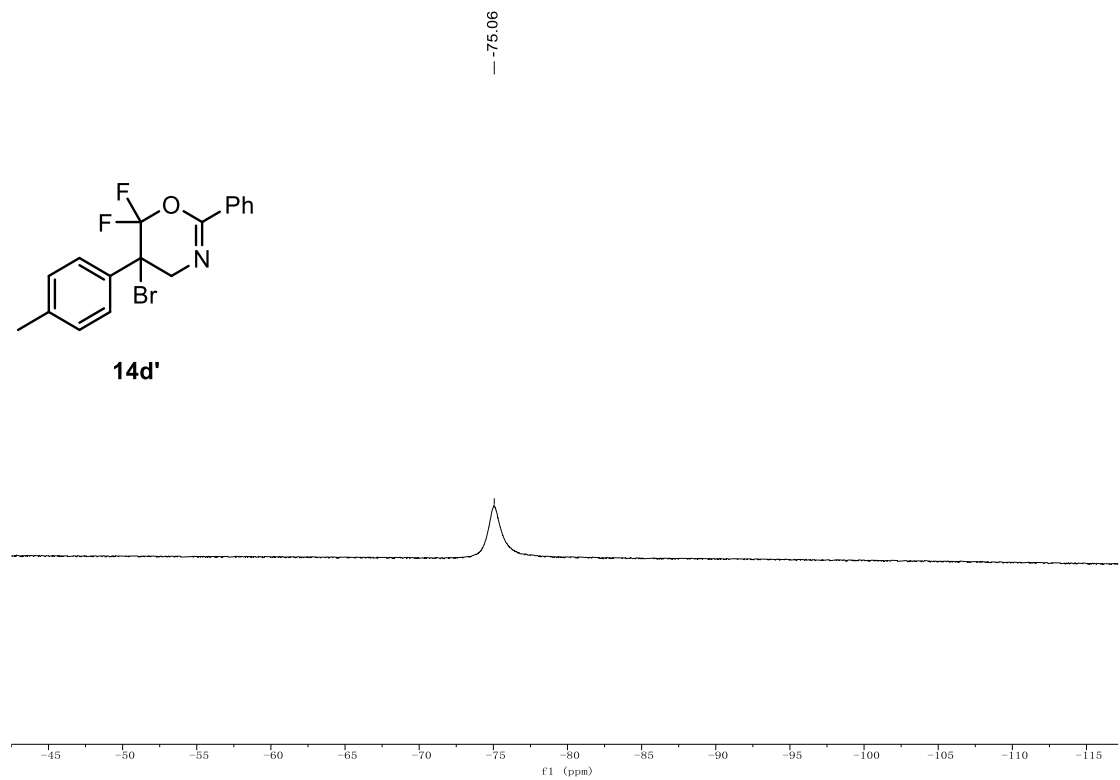

Figure S246.  $^{19}\text{F}$  NMR of 5-bromo-6,6-difluoro-2-phenyl-5-(*p*-tolyl)-5,6-dihydro-4*H*-1,3-oxazine (**14d'**)

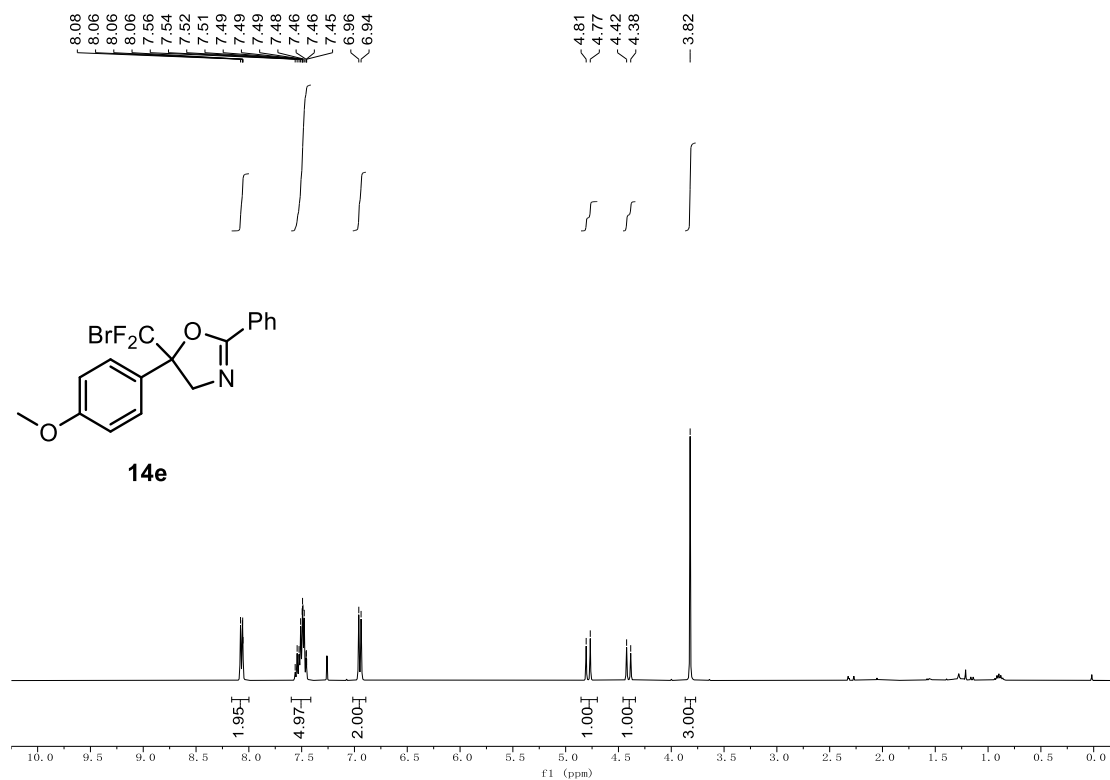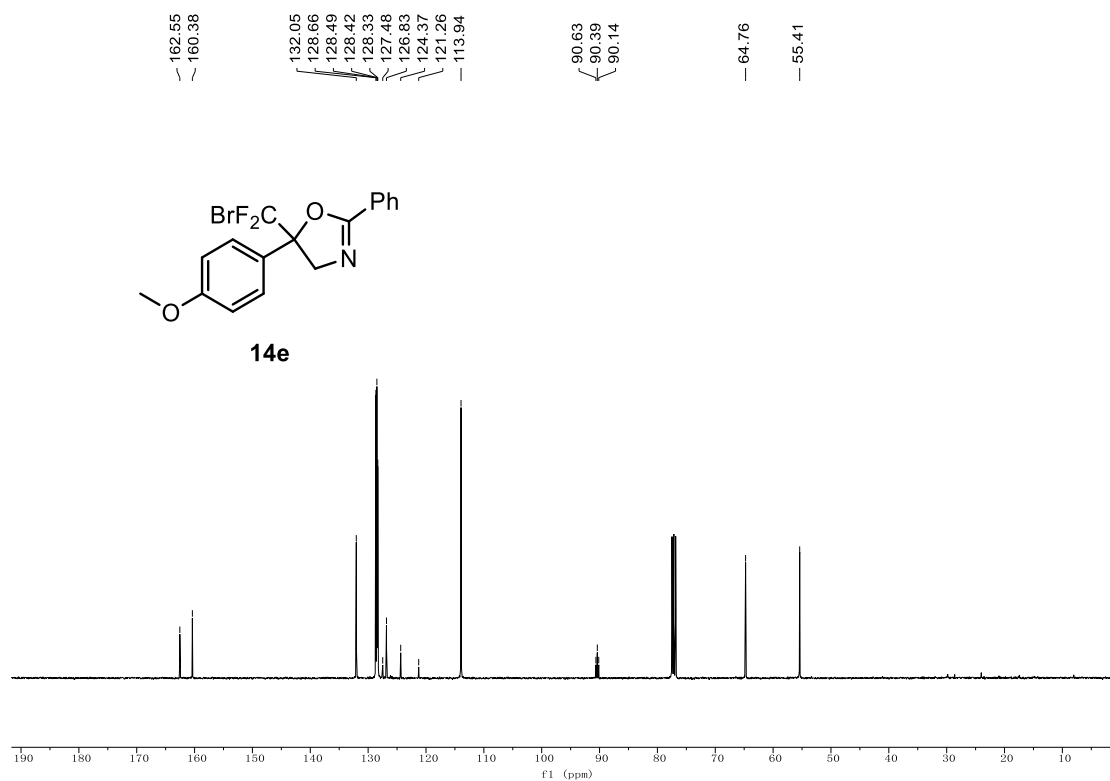

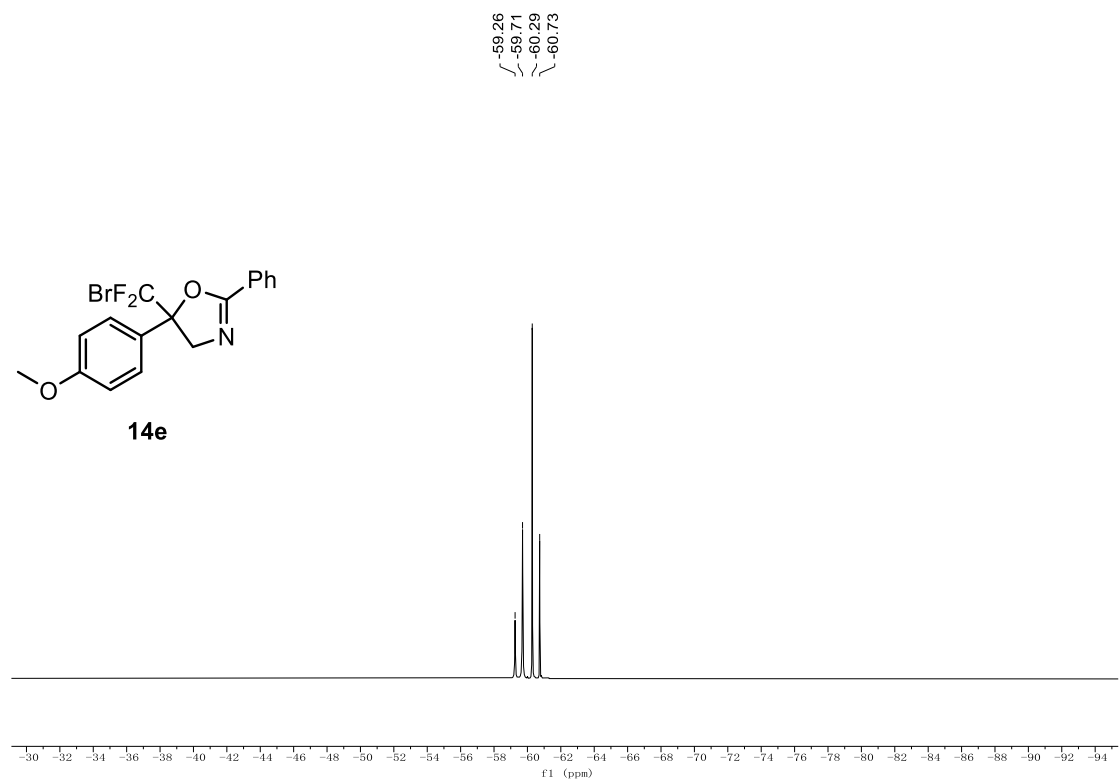

## NMR Spectra of New Substrates

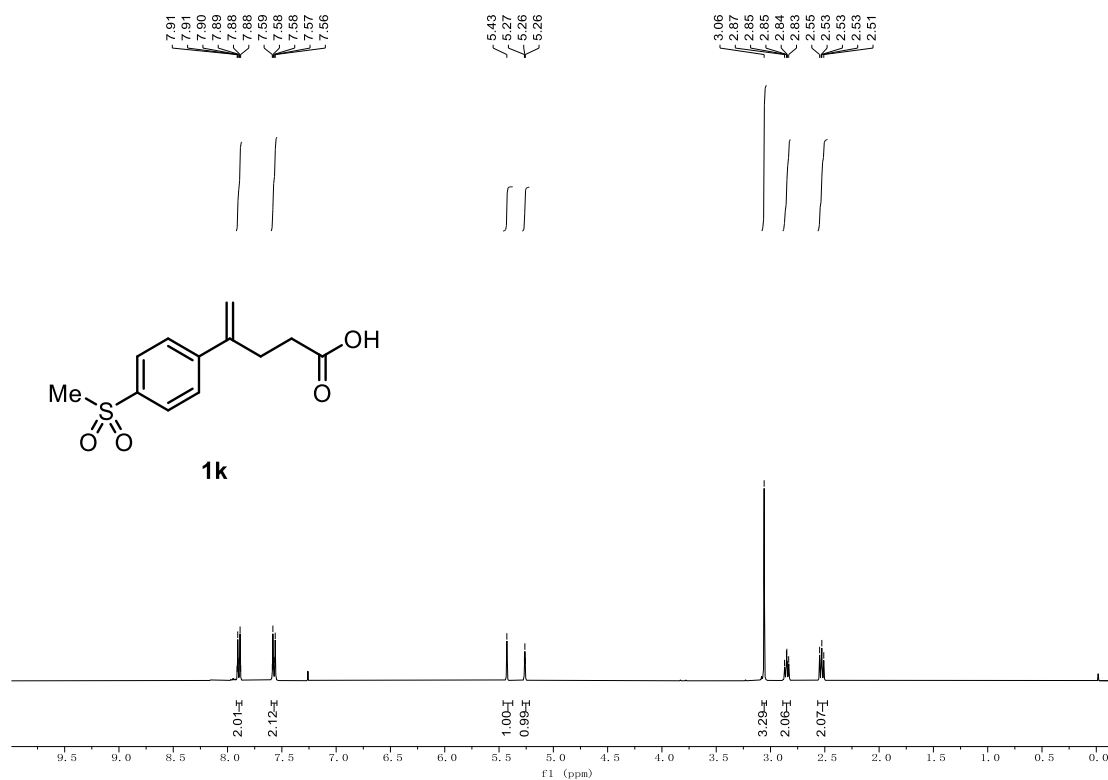

Figure S250. <sup>1</sup>H MNR of 4-(4-(methylsulfonyl)phenyl)pent-4-enoic acid (**1k**)

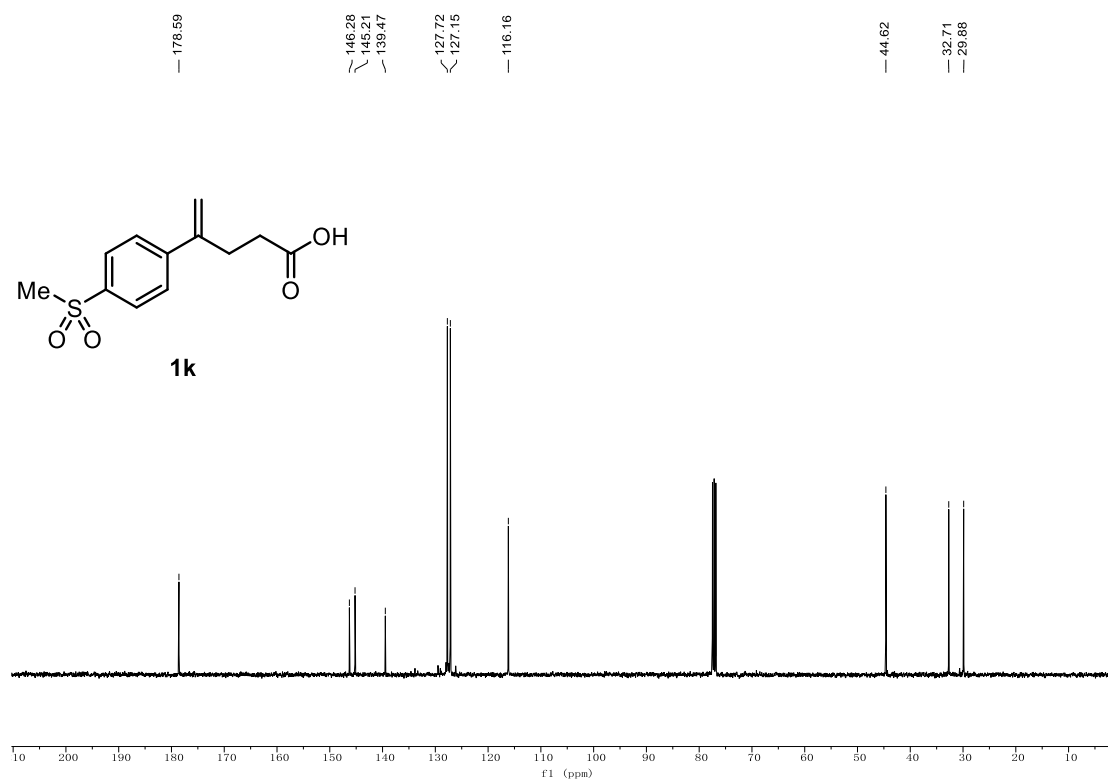

Figure S251. <sup>13</sup>C MNR of 4-(4-(methylsulfonyl)phenyl)pent-4-enoic acid (**1k**)

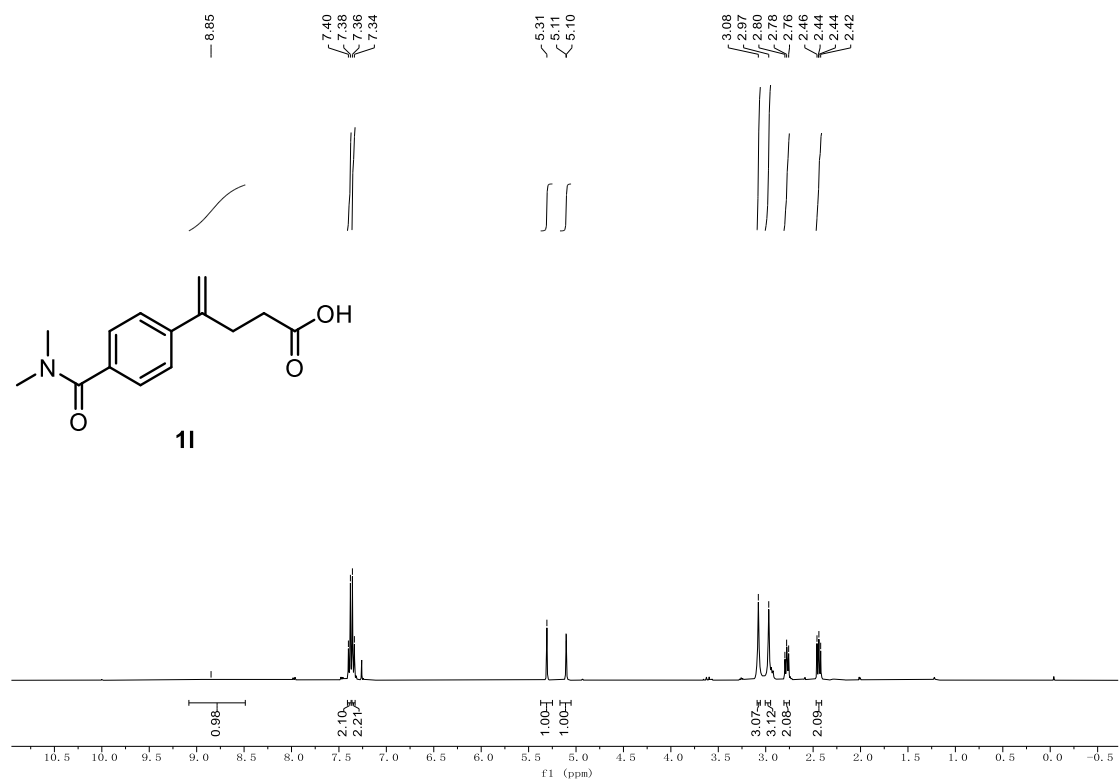

**Figure S252.** <sup>1</sup>H NMR of 4-(4-(dimethylcarbamoyl)phenyl)pent-4-enoic acid (**11**)

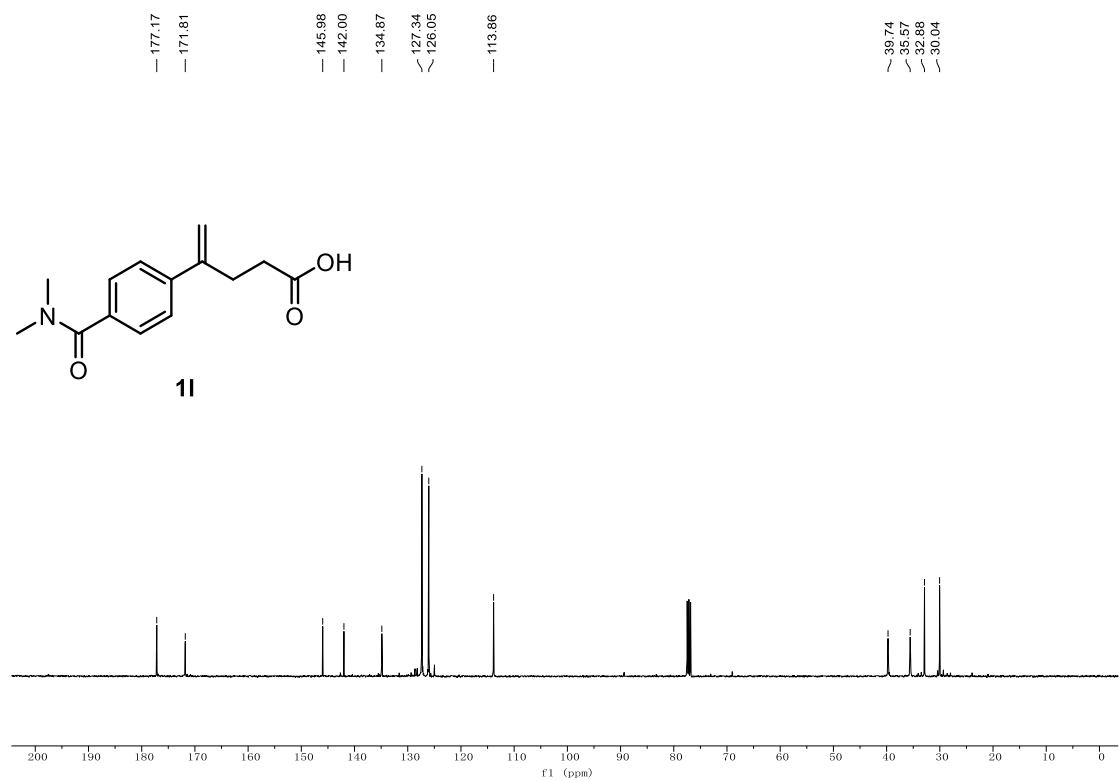

**Figure S253.** <sup>13</sup>C NMR of 4-(4-(dimethylcarbamoyl)phenyl)pent-4-enoic acid (**11**)



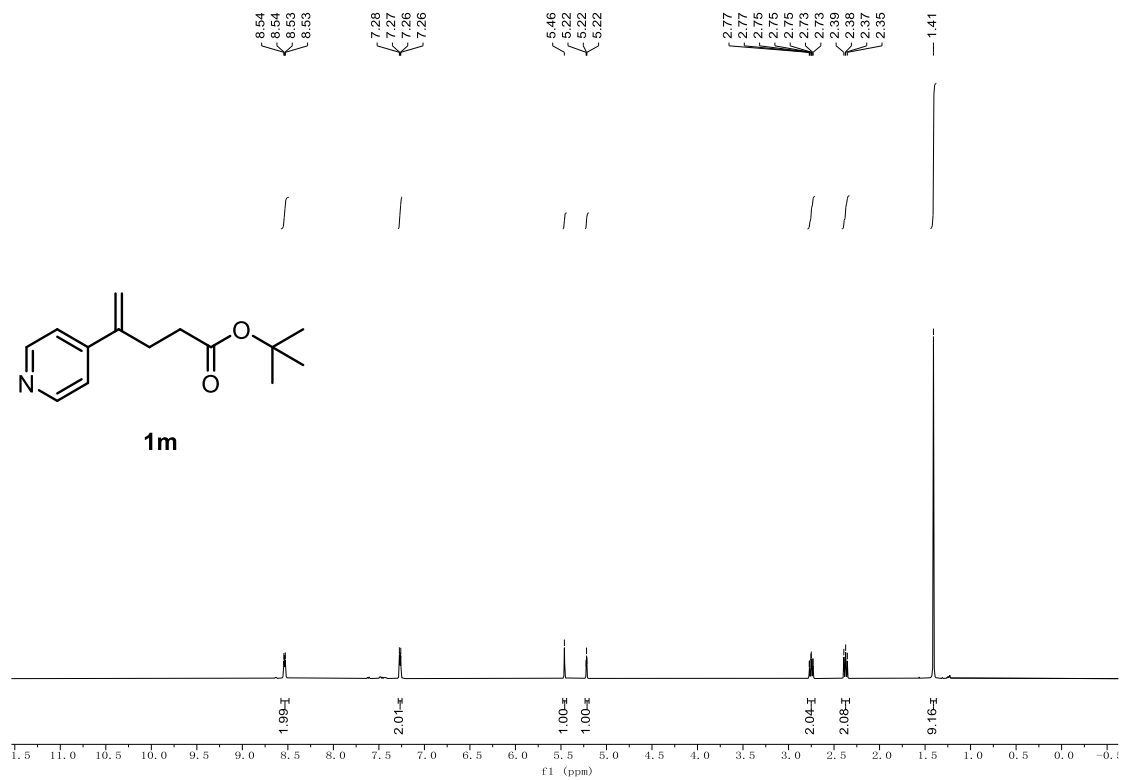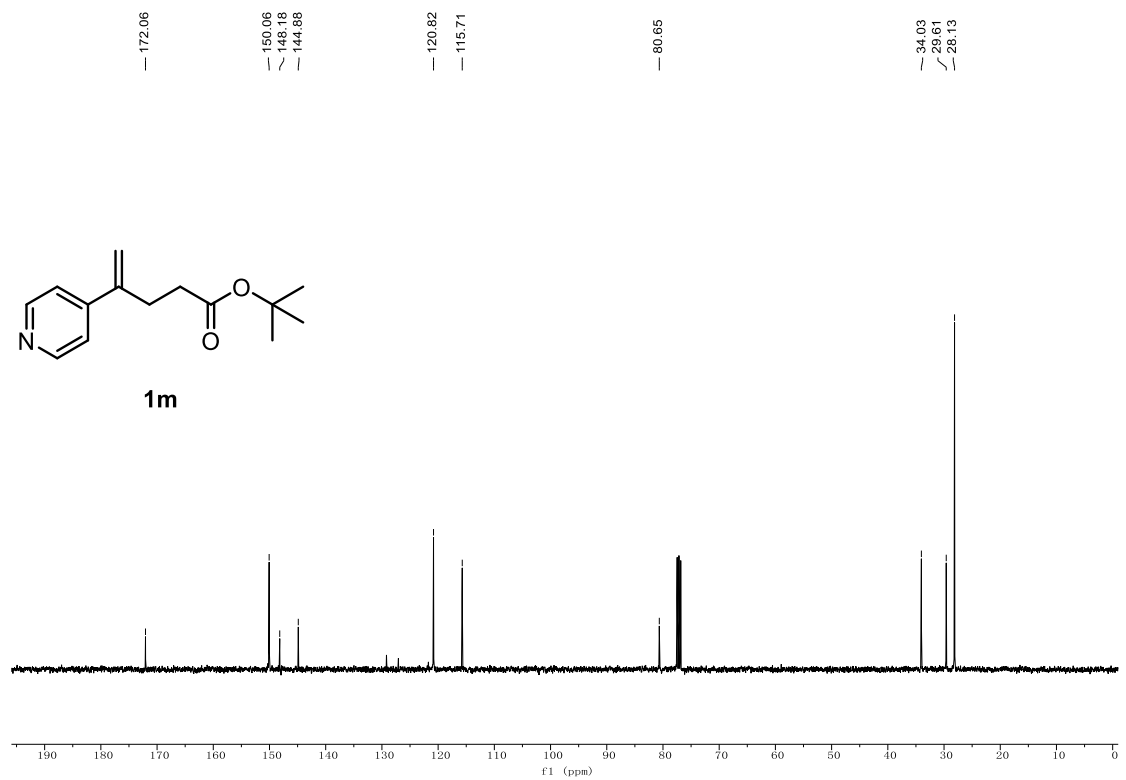

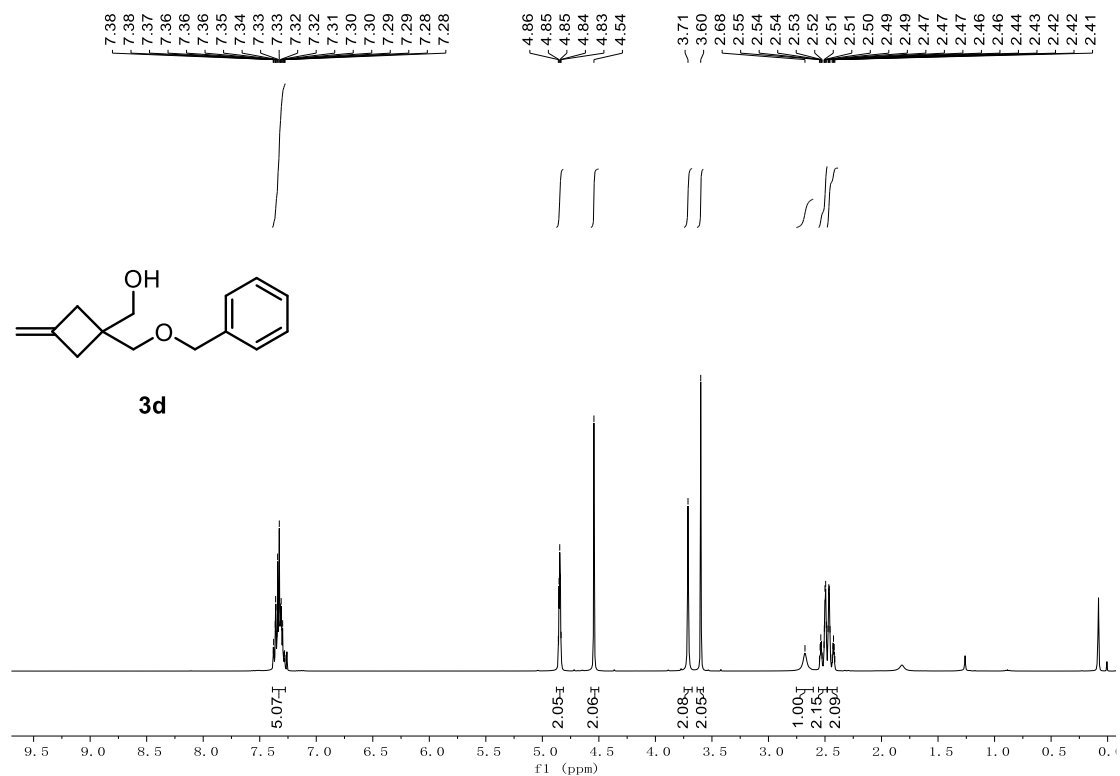

Figure S256. <sup>1</sup>H NMR of (1-((benzyloxy)methyl)-3-methylenecyclobutyl)methanol (**3d**)

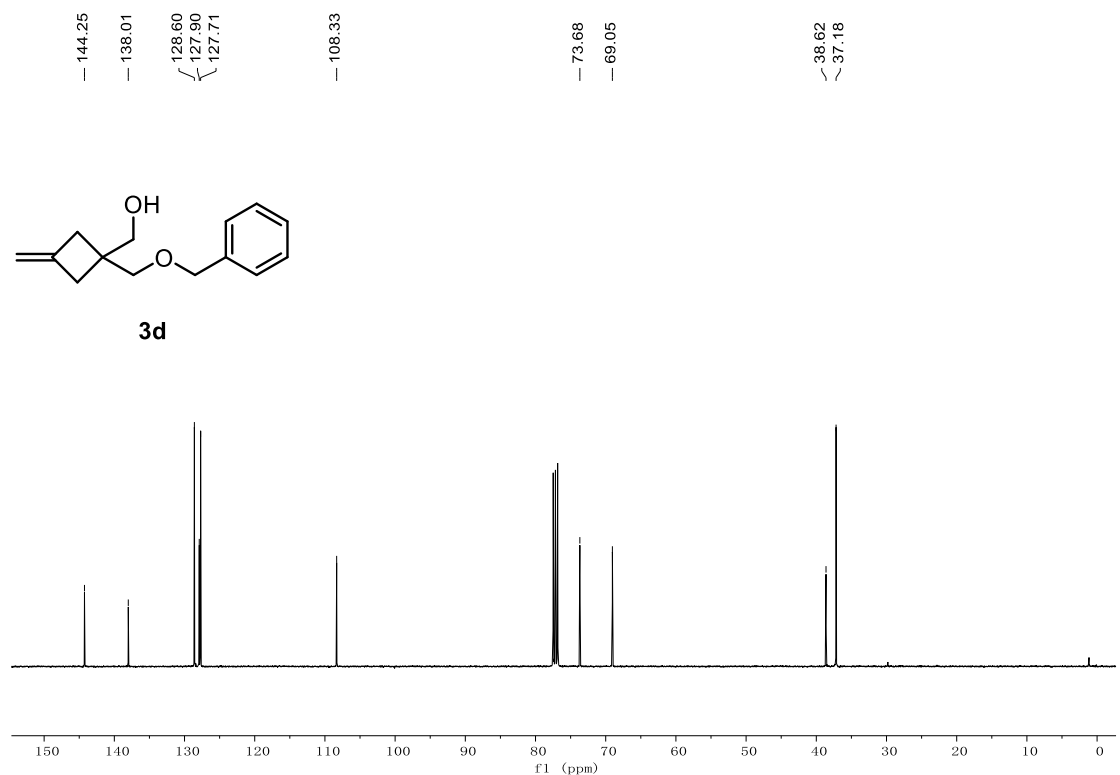

Figure S257. <sup>13</sup>C NMR of (1-((benzyloxy)methyl)-3-methylenecyclobutyl)methanol (**3d**)



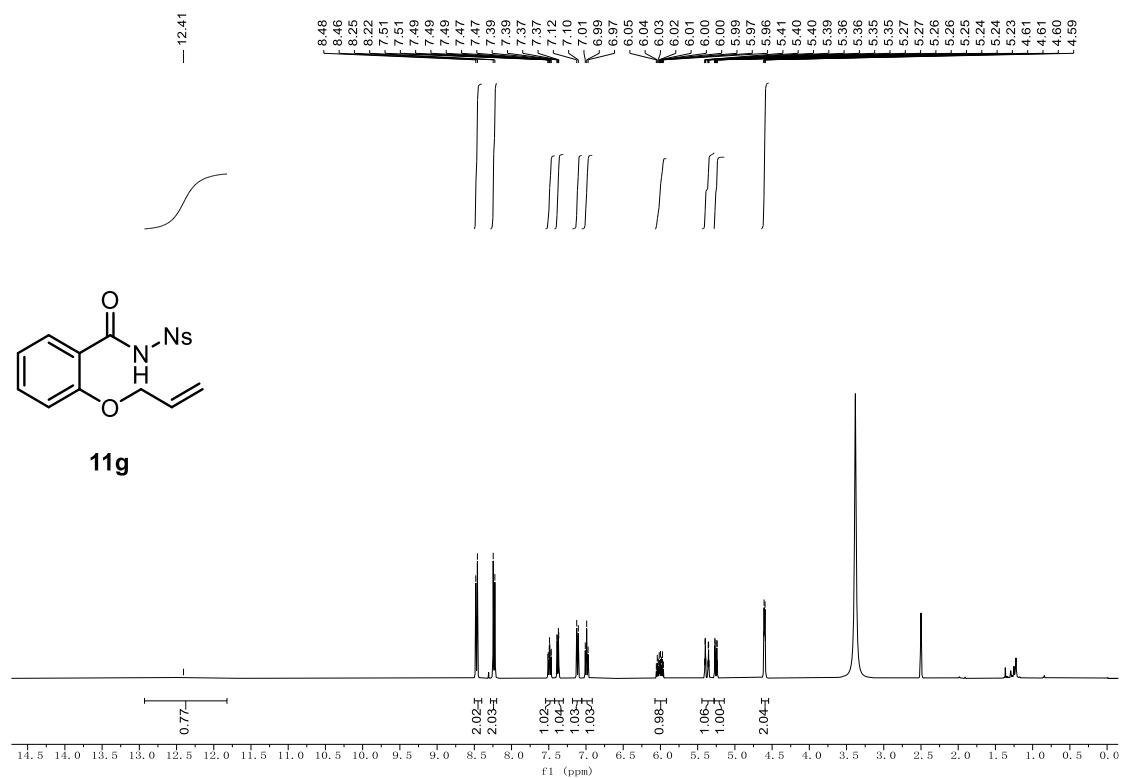

Figure S260.  $^1\text{H}$  MNR of 2-(allyloxy)-*N*-((4-nitrophenyl)sulfonyl)benzamide (**11g**)

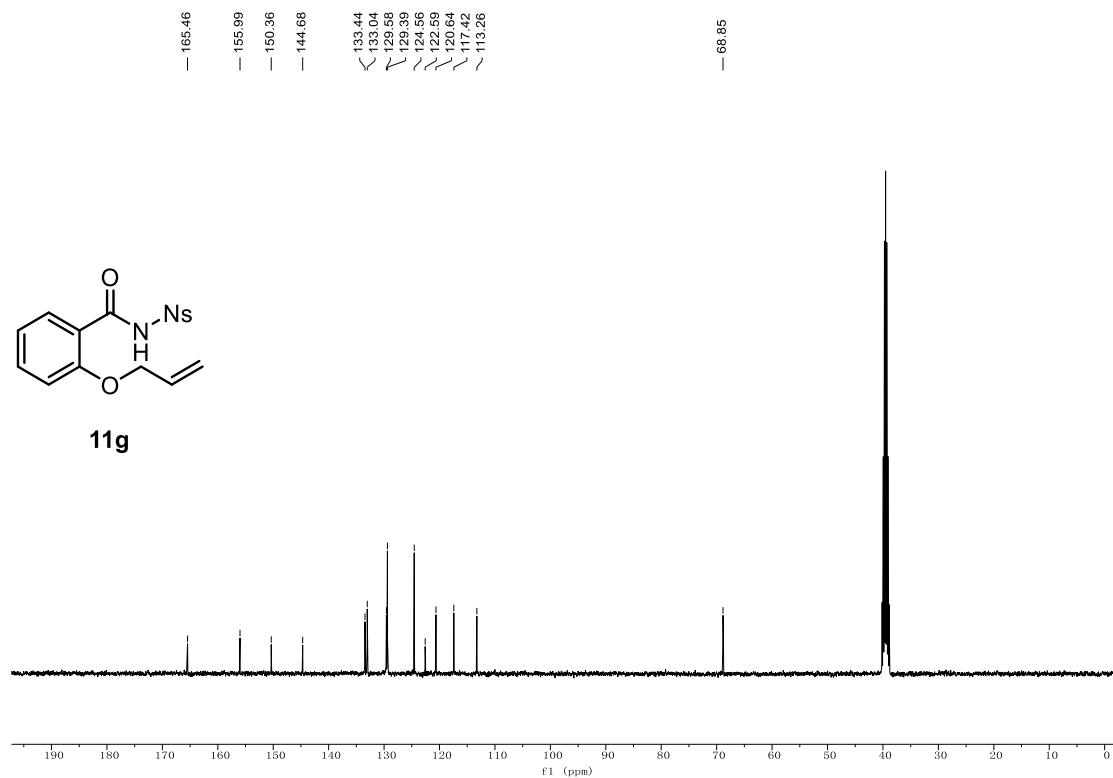

Figure S261.  $^{13}\text{C}$  MNR of 2-(allyloxy)-*N*-((4-nitrophenyl)sulfonyl)benzamide (**11g**)

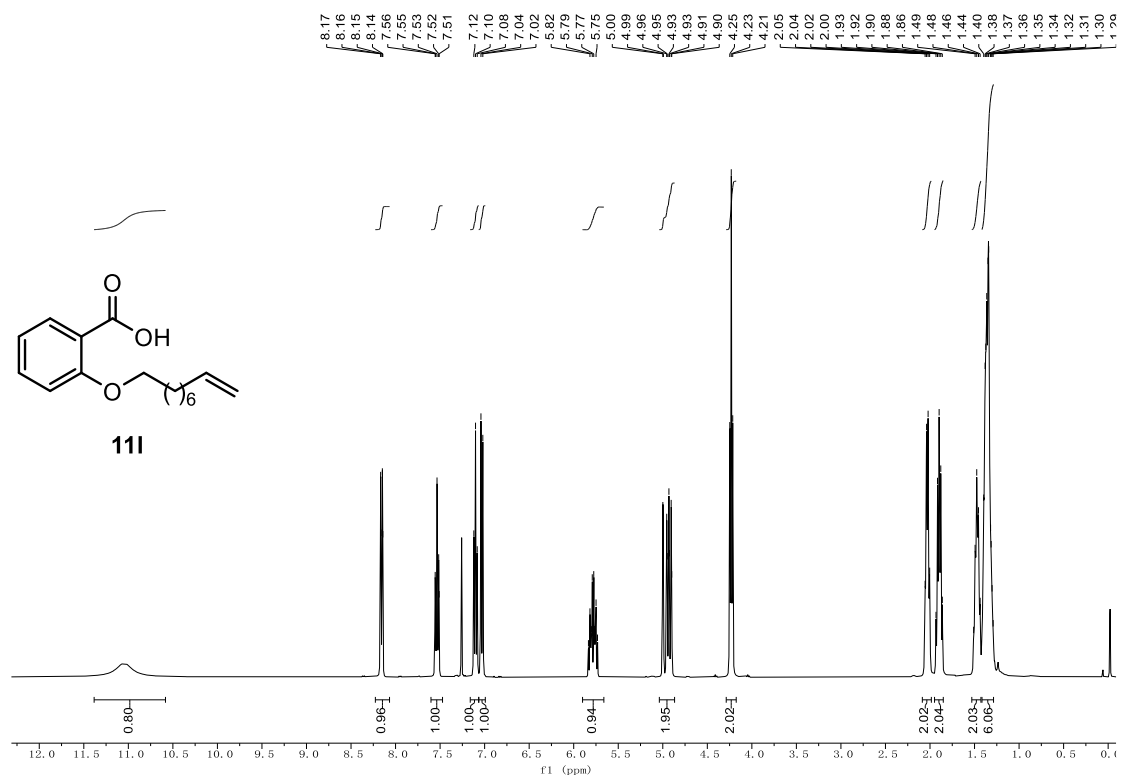

Figure S262. <sup>1</sup>H MNR of 2-(non-8-en-1-yloxy)benzoic acid (**111**)

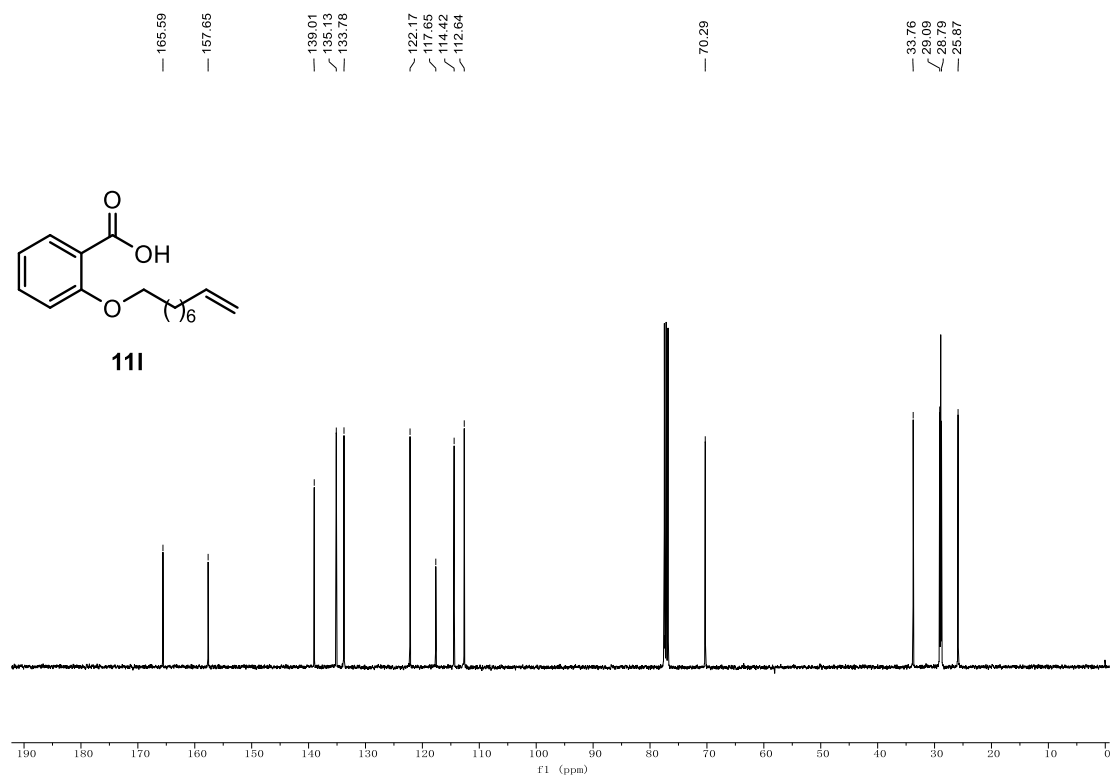

Figure S263. <sup>13</sup>C MNR of 2-(non-8-en-1-yloxy)benzoic acid (**111**)

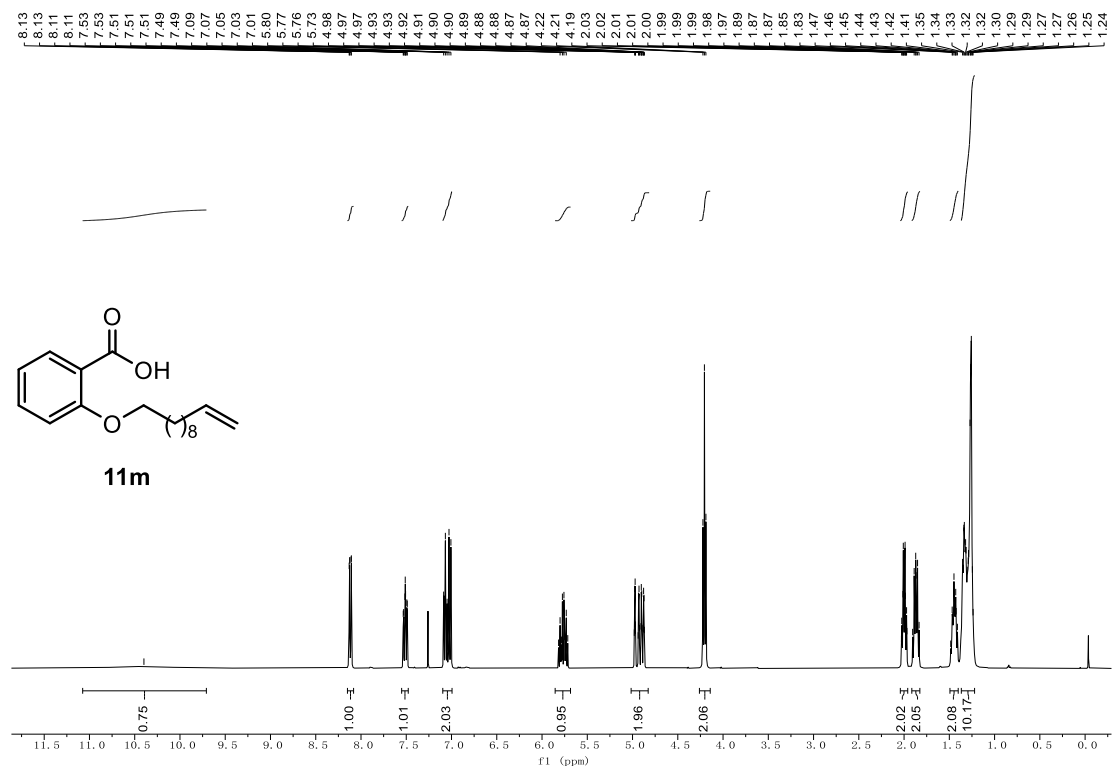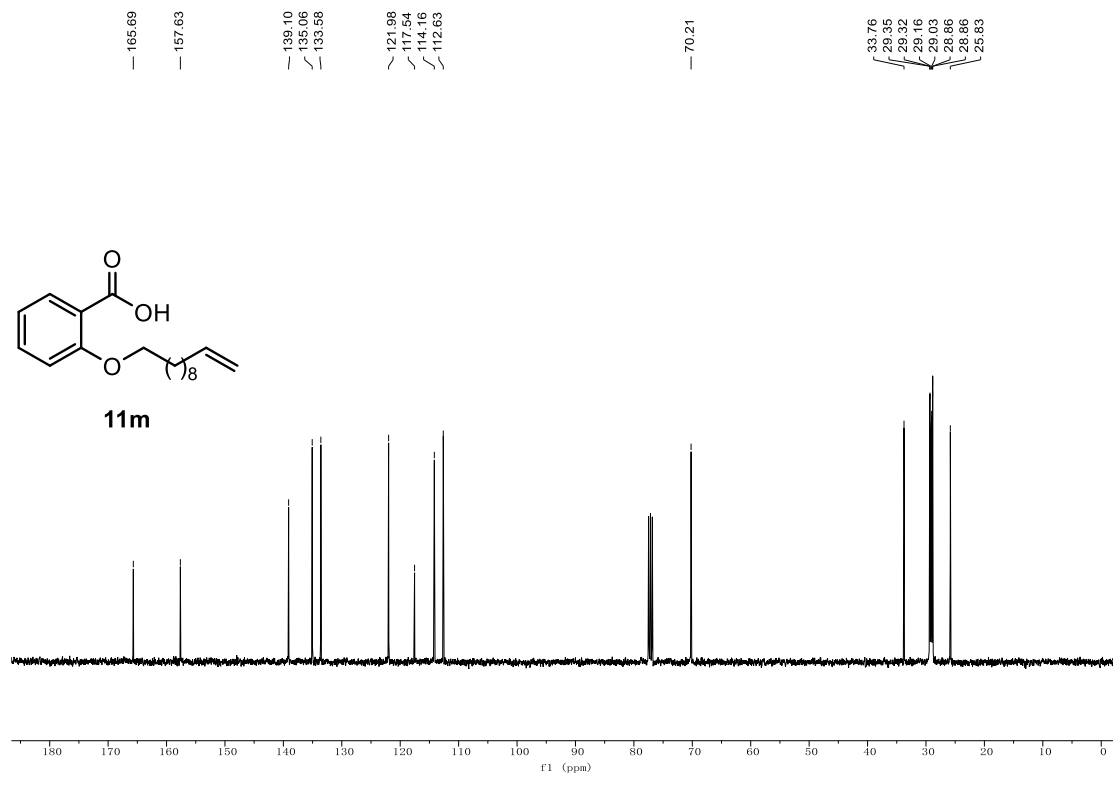

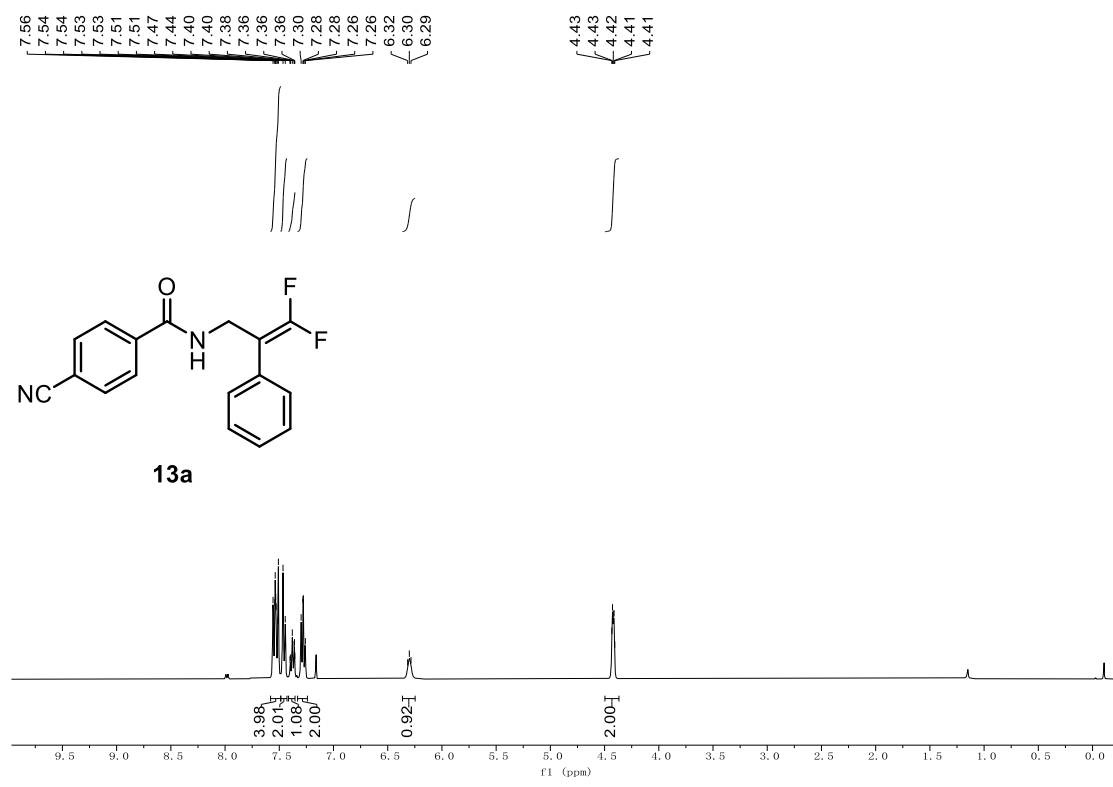

Figure S266. <sup>1</sup>H NMR of 4-cyano-N-(3,3-difluoro-2-phenylallyl)benzamide (13a)

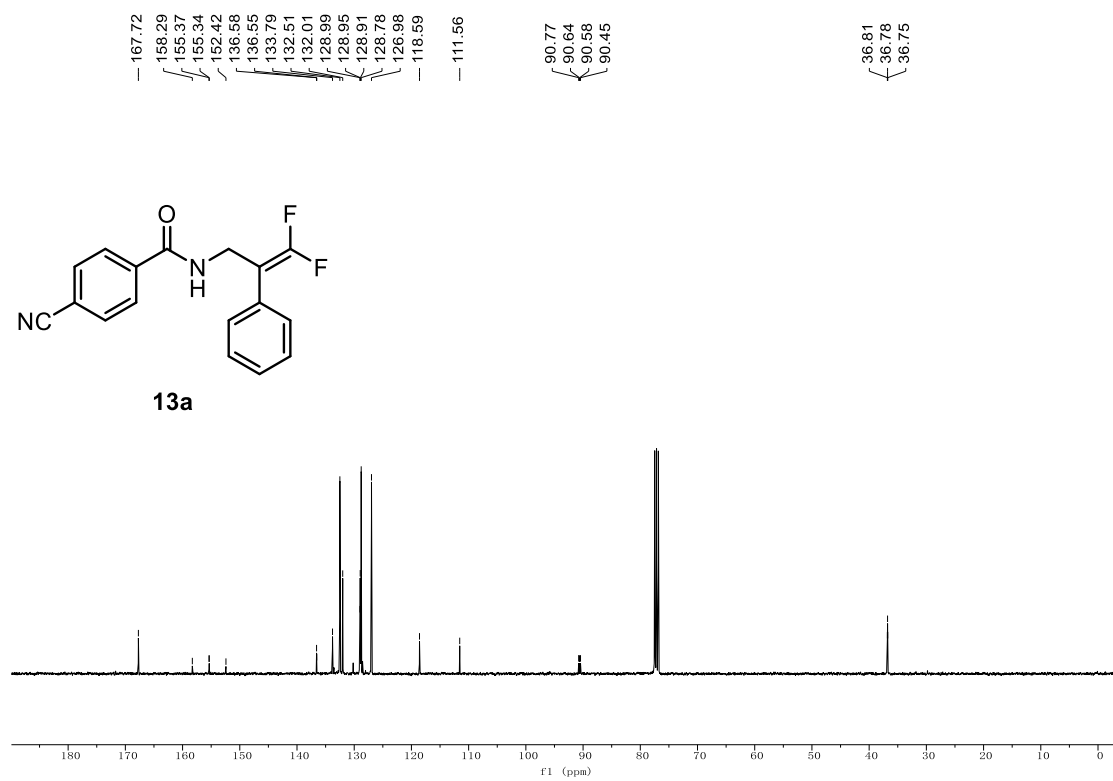

Figure S267. <sup>13</sup>C NMR of 4-cyano-N-(3,3-difluoro-2-phenylallyl)benzamide (13a)

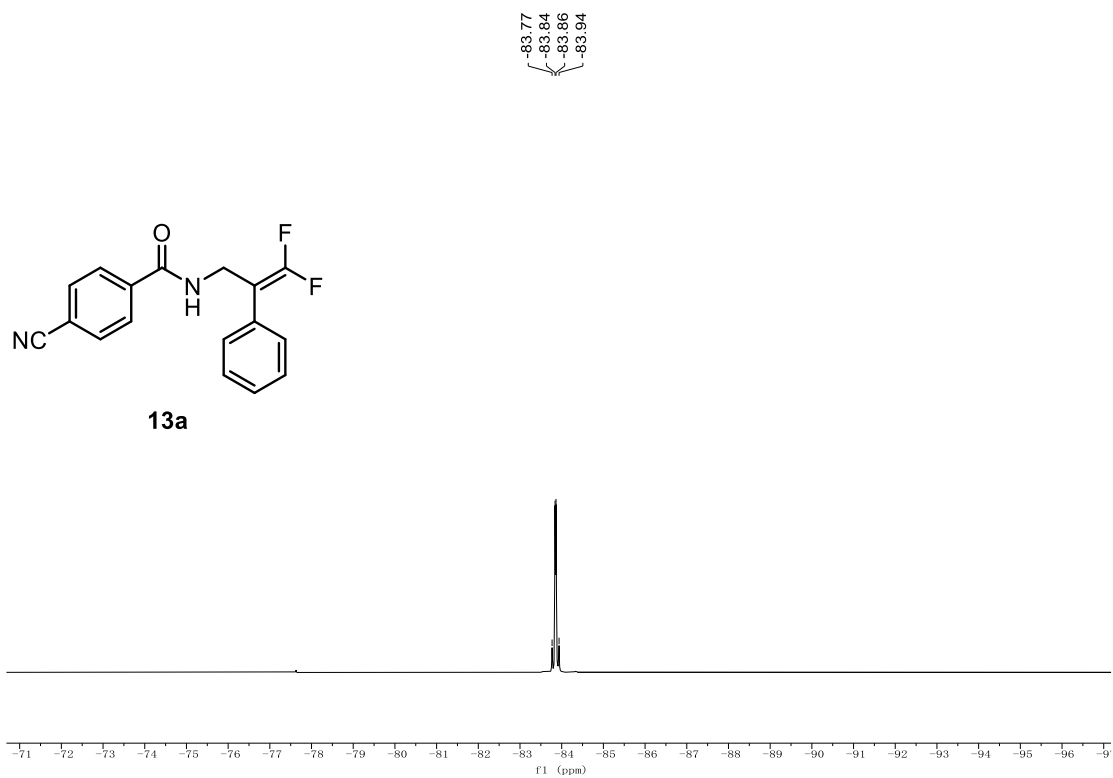

**Figure S268.**  $^{19}\text{F}$  MNR of 4-cyano-*N*-(3,3-difluoro-2-phenylallyl)benzamide (**13a**)

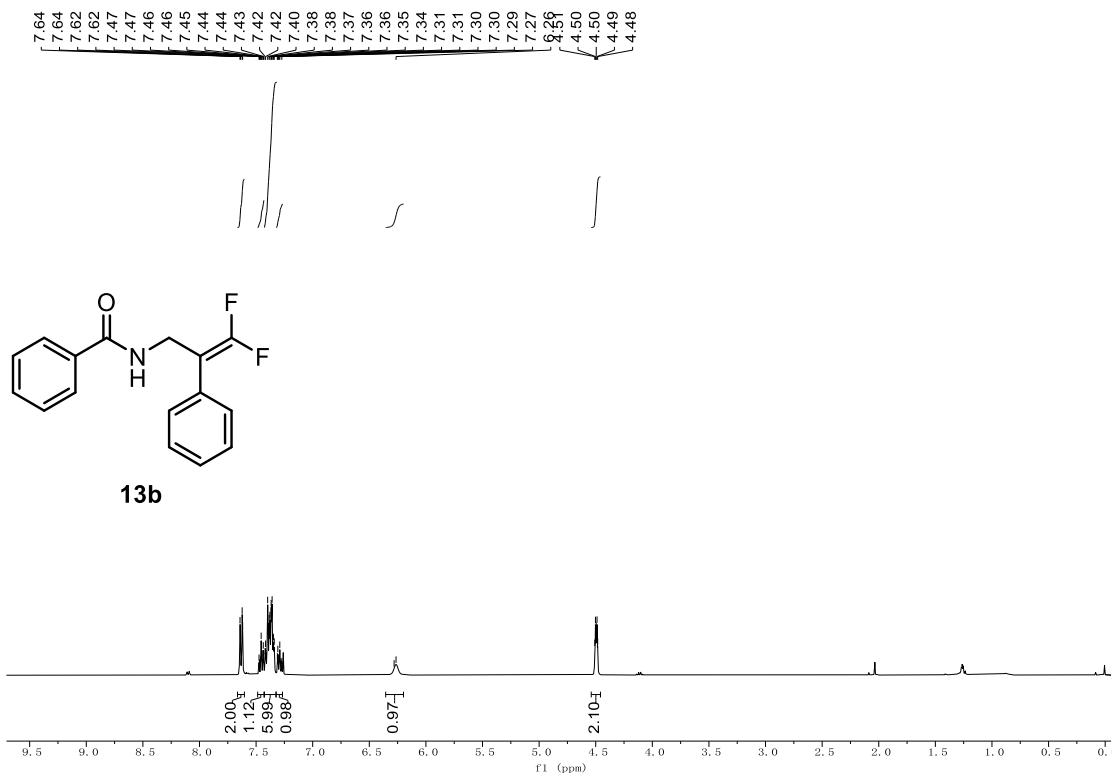

**Figure S269.**  $^1\text{H}$  MNR of *N*-(3,3-difluoro-2-phenylallyl)benzamide (**13b**)



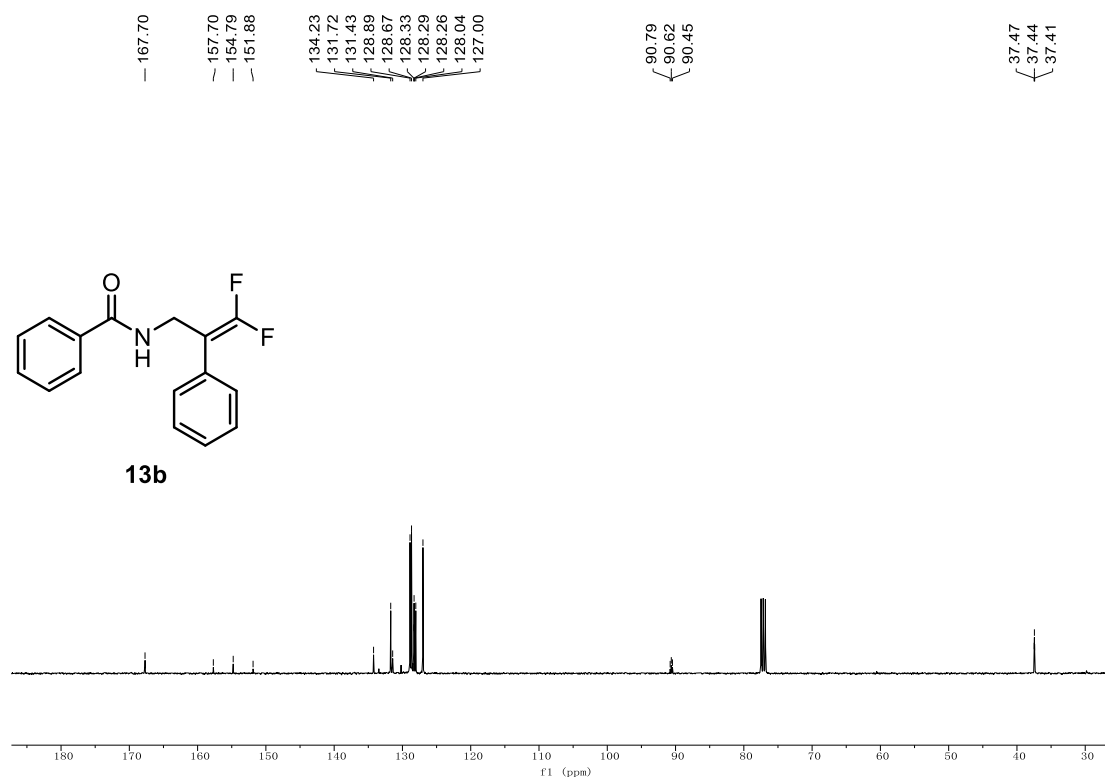

**Figure S270.**  $^{13}\text{C}$  MNR of *N*-(3,3-difluoro-2-phenylallyl)benzamide (**13b**)

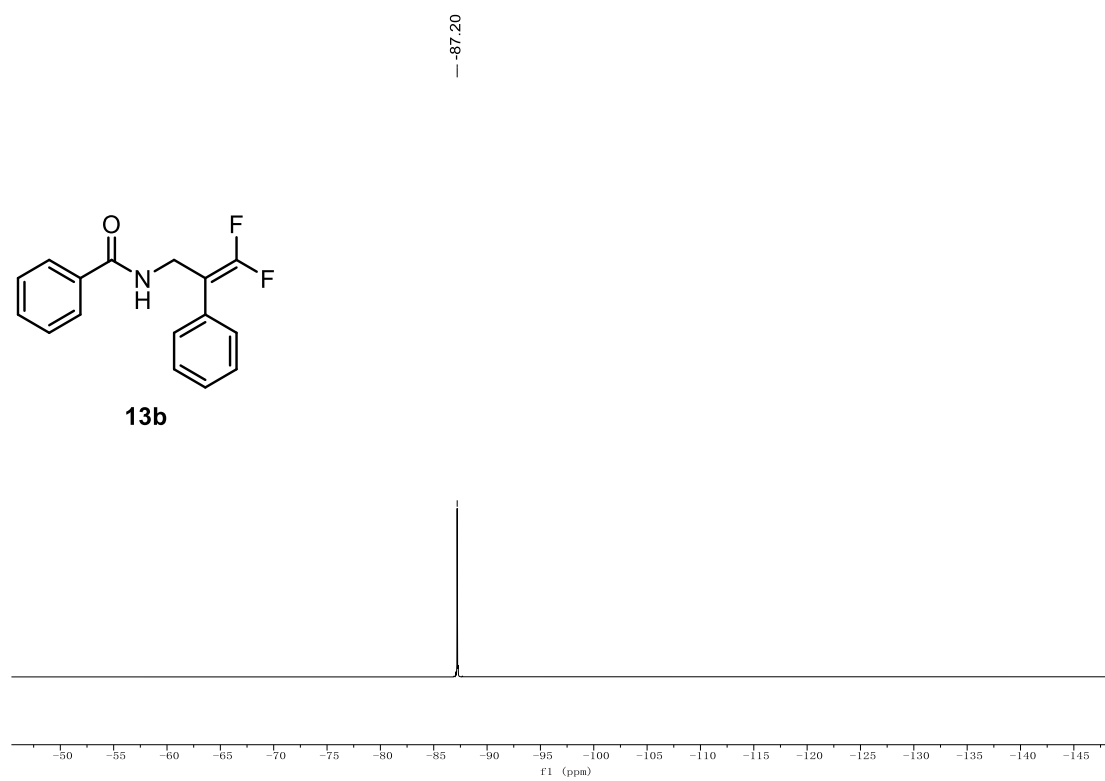

**Figure S271.**  $^{19}\text{F}$  MNR of *N*-(3,3-difluoro-2-phenylallyl)benzamide (**13b**)
